# Supplementary material for: Extensive Evolutionary Changes in Regulatory Element Activity during Human Origins Are Associated with Altered Gene Expression and Positive Selection
Source: PLOS journal article supplement (doi:10.1371/journal.pgen.1002789), 2012-06-28

## Human DHS Gains

human vs chimp

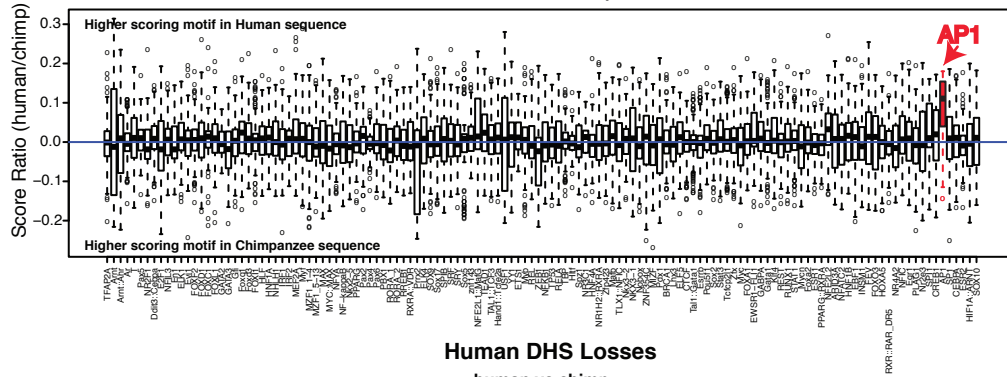

## Human DHS Losses

human vs chimp

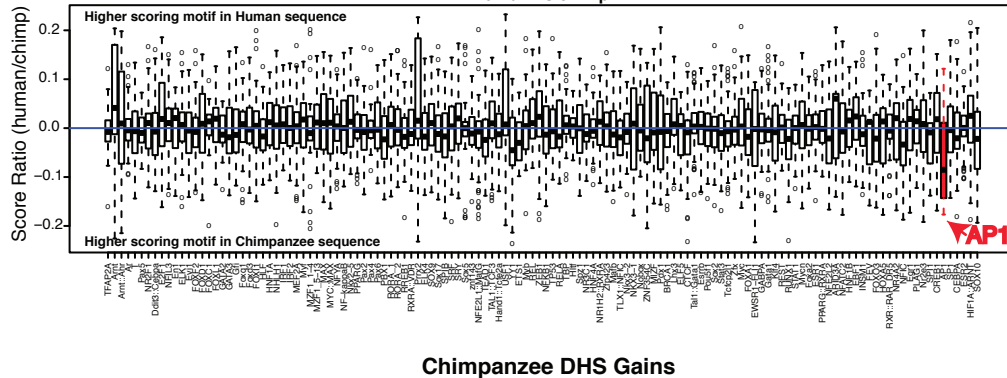

## Chimpanzee DHS Gains

human vs chimp

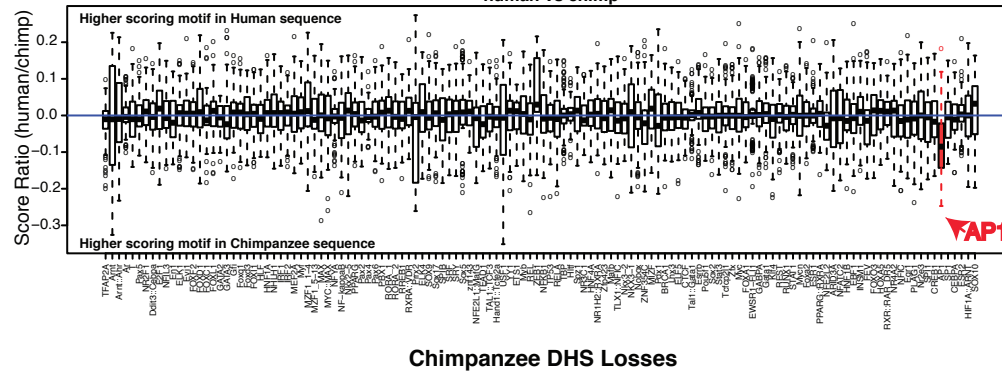

## Chimpanzee DHS Losses

human vs chimp

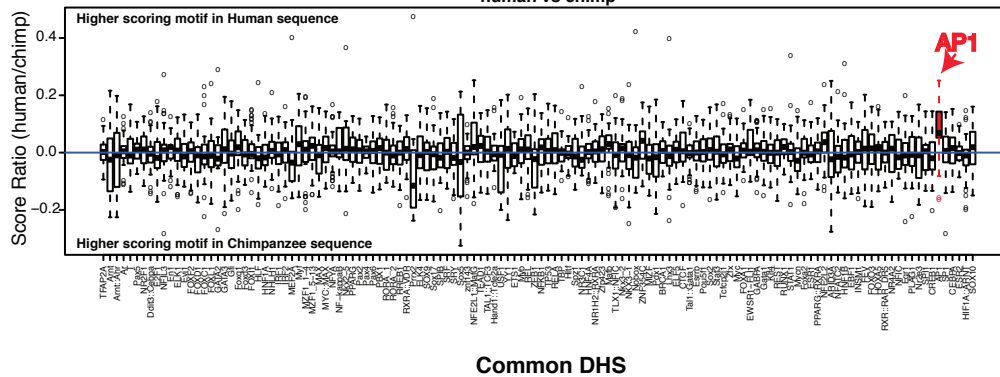

## Common DHS

human vs chimp

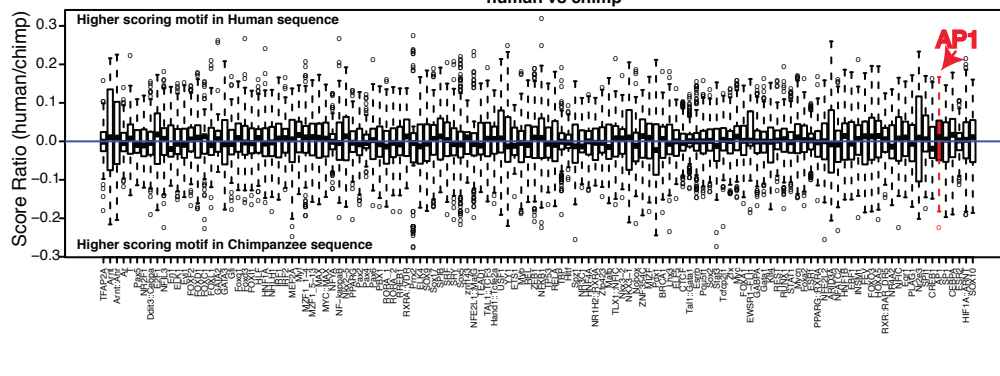

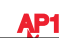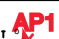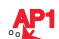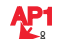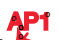

## chimp vs macaque

Score Ratio (chimp/macaque)

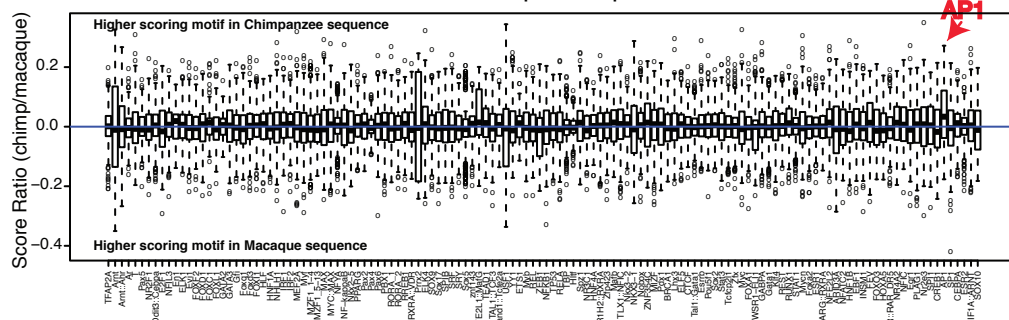

## chimp vs macaque

Score Ratio (chimp/macaque)

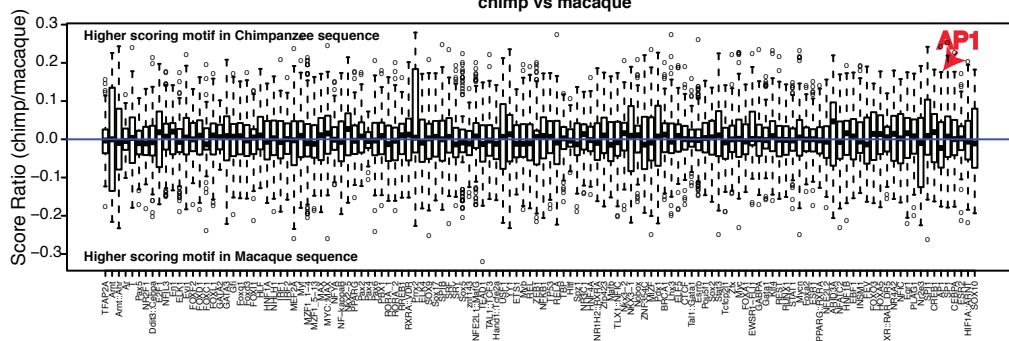

## chimp vs macaque

Score Ratio (chimp/macaque)

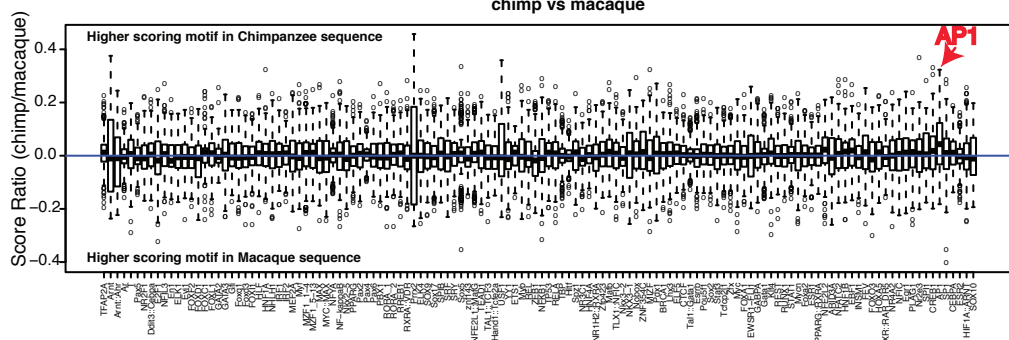

## chimp vs macaque

Score Ratio (chimp/macaque)

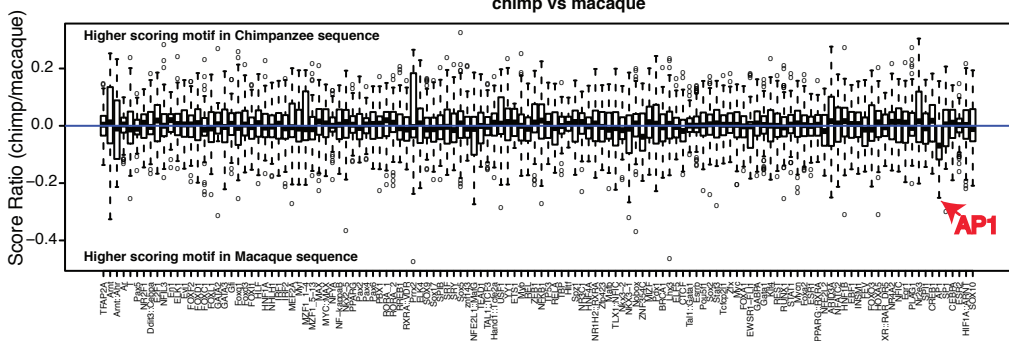

## chimp vs macaque

Score Ratio (chimp/macaque)

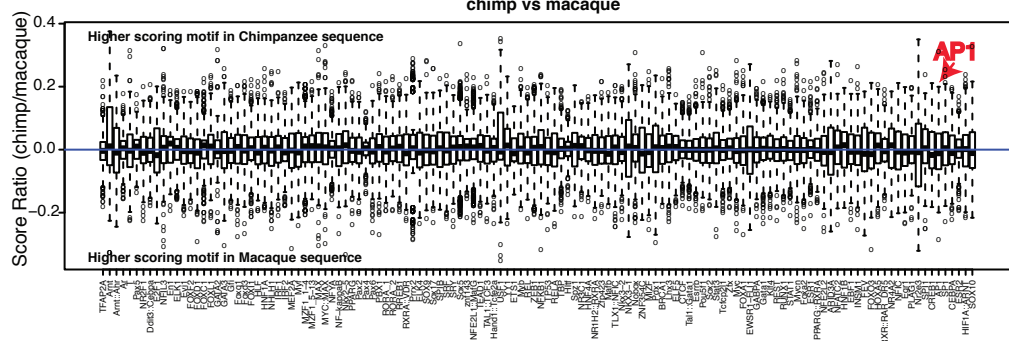

Supplement: S1 (10.1371/journal.pgen.1002789.s001) [file journal.pgen.1002789.s001]
