# Supplementary material for: Extensive Evolutionary Changes in Regulatory Element Activity during Human Origins Are Associated with Altered Gene Expression and Positive Selection
Source: PLOS journal article supplement (doi:10.1371/journal.pgen.1002789), 2012-06-28

1 HumanUpFibroblast.final.bed

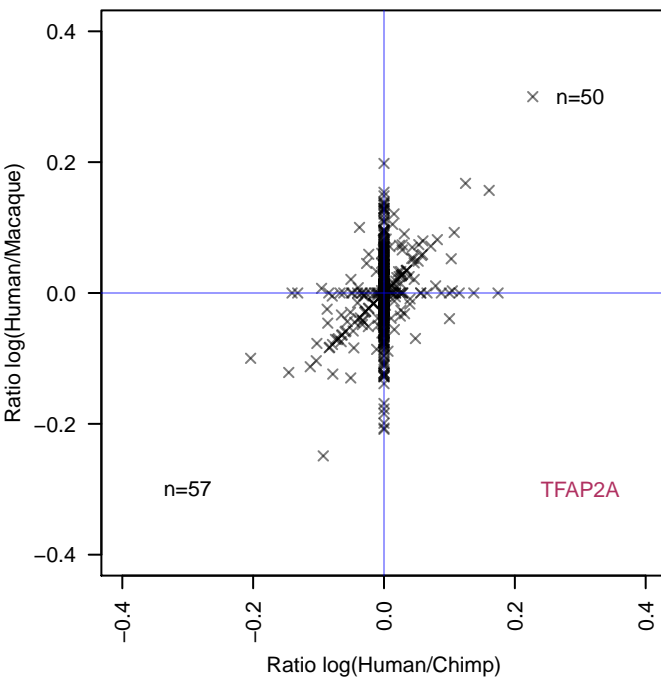

HumanDownFibroblast.final.bed

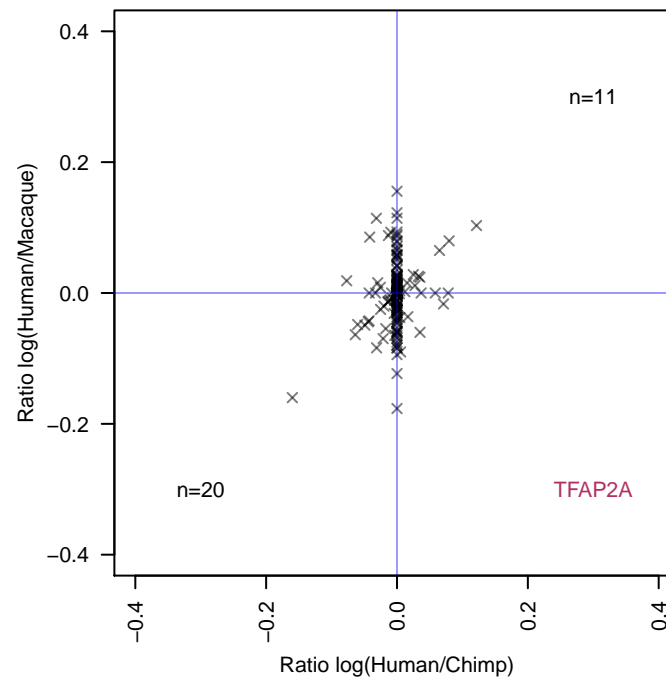

commonFibroblast.final.bed

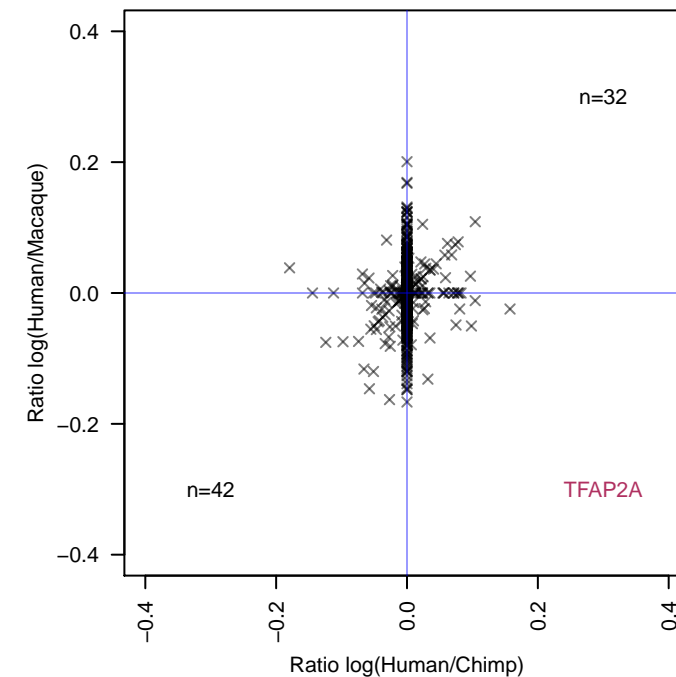

ChimpUpFibroblast.final.bed

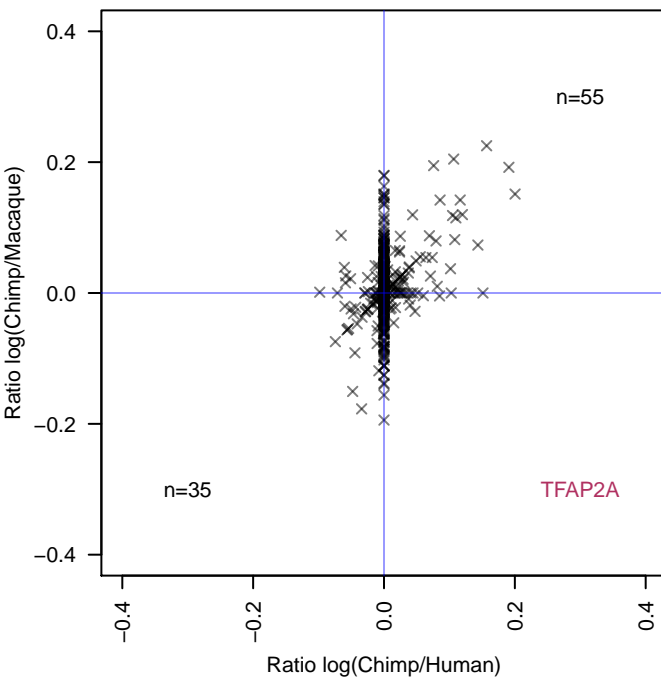

ChimpDownFibroblast.final.bed

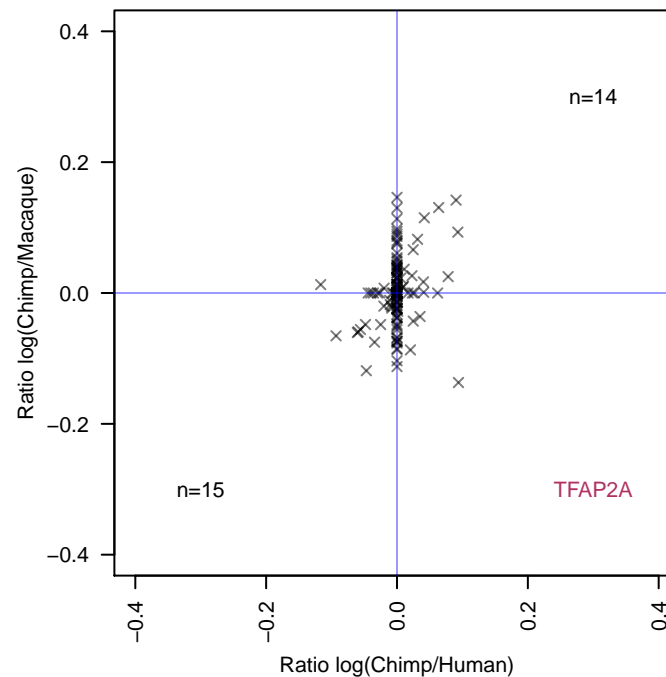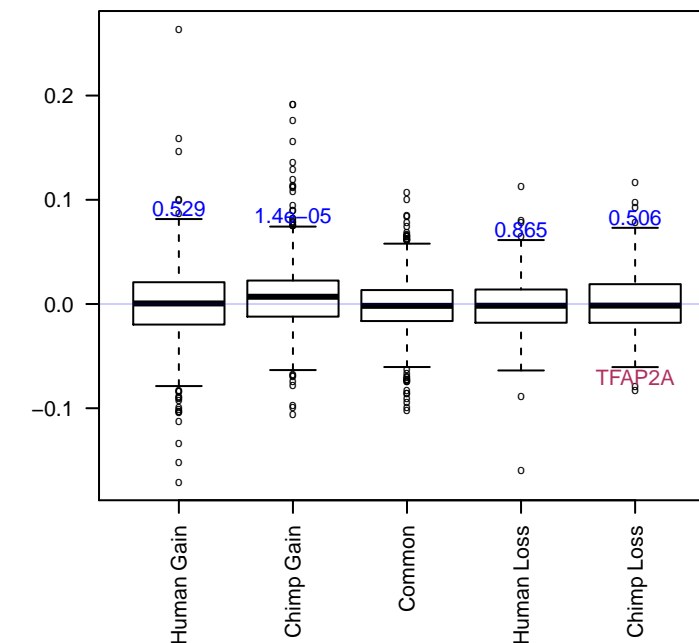

2

HumanUpFibroblast.final.bed

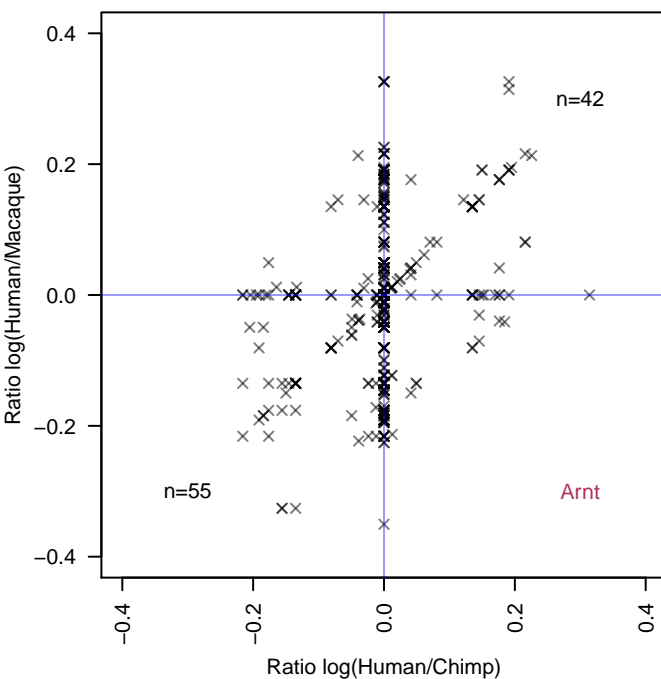

HumanDownFibroblast.final.bed

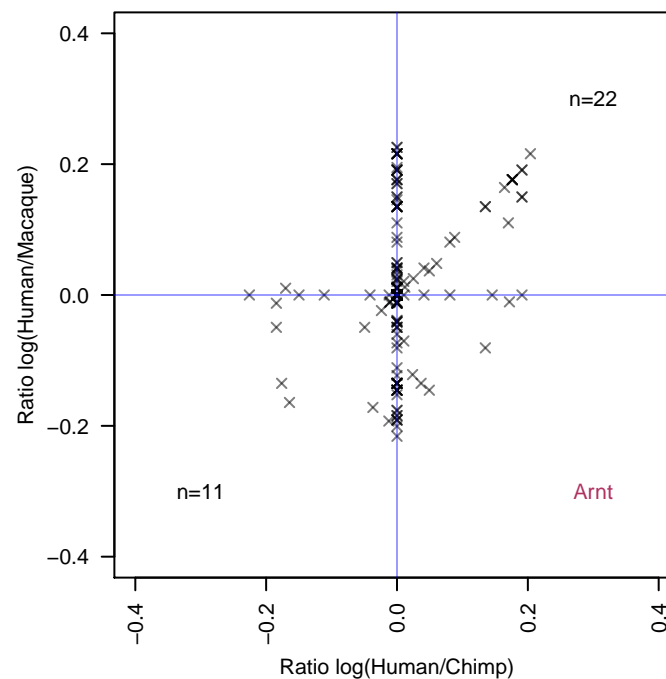

commonFibroblast.final.bed

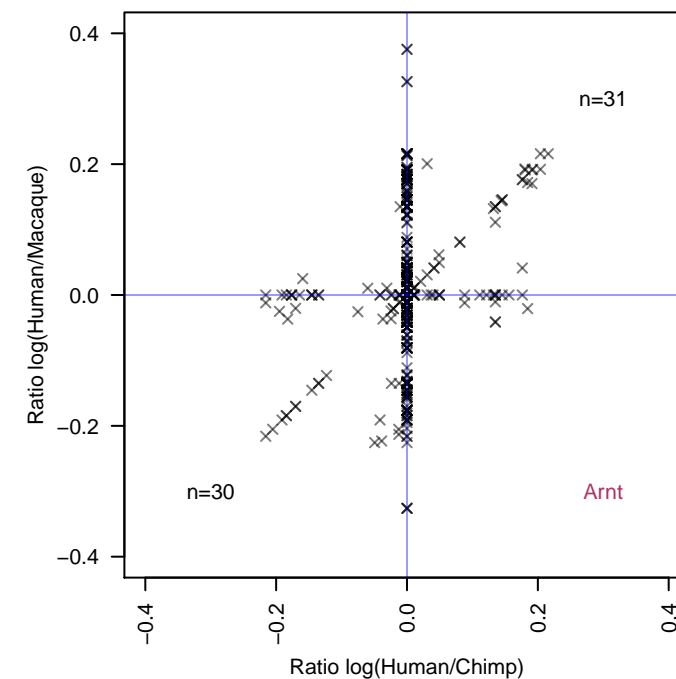

ChimpUpFibroblast.final.bed

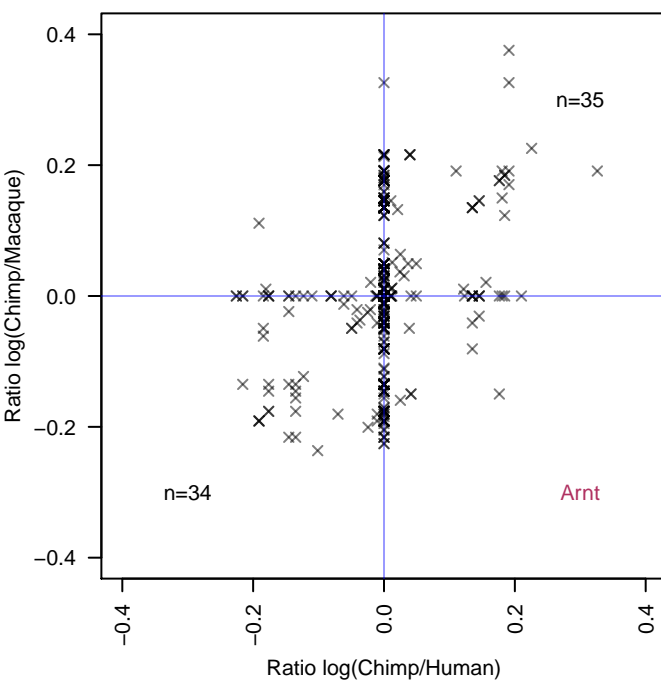

ChimpDownFibroblast.final.bed

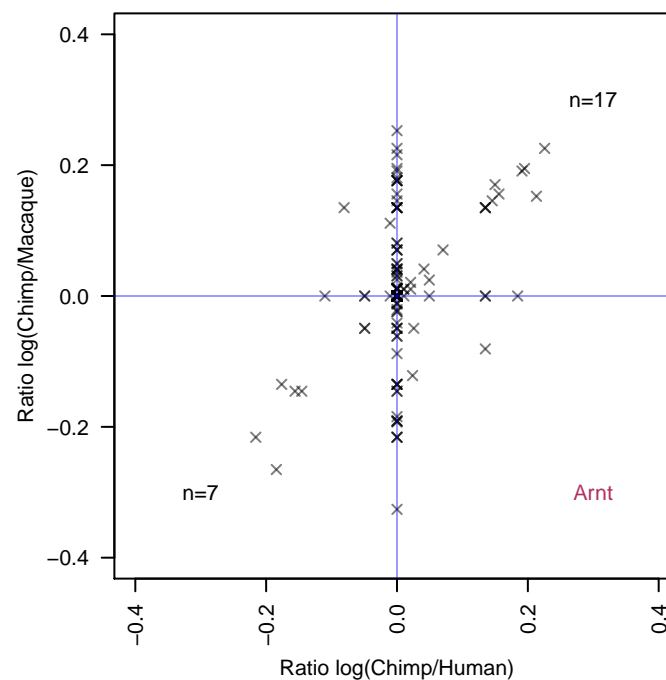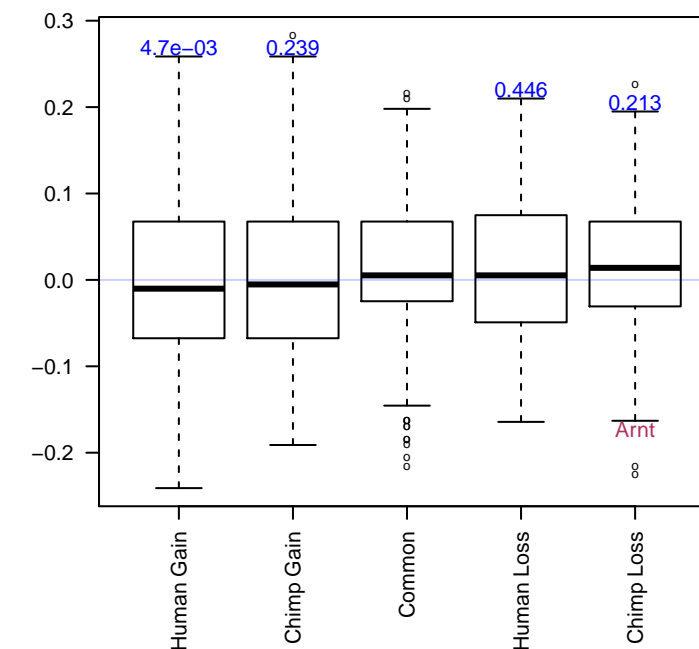

3

HumanUpFibroblast.final.bed

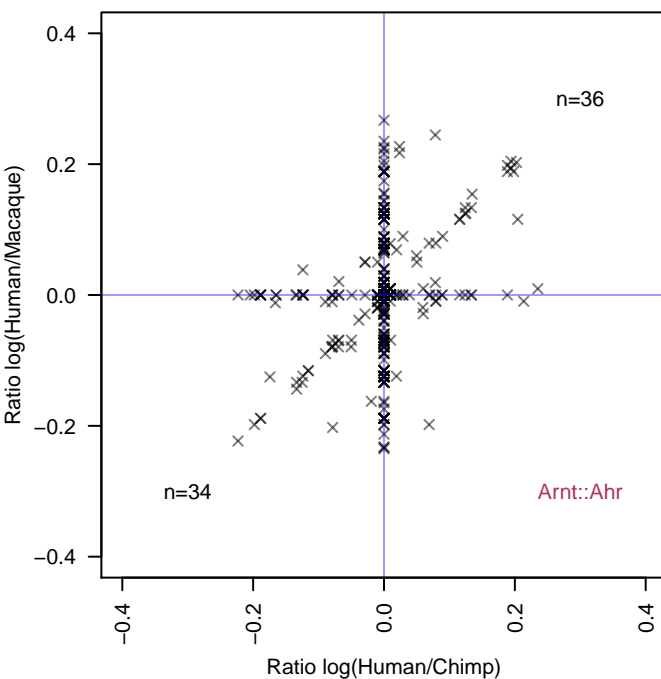

HumanDownFibroblast.final.bed

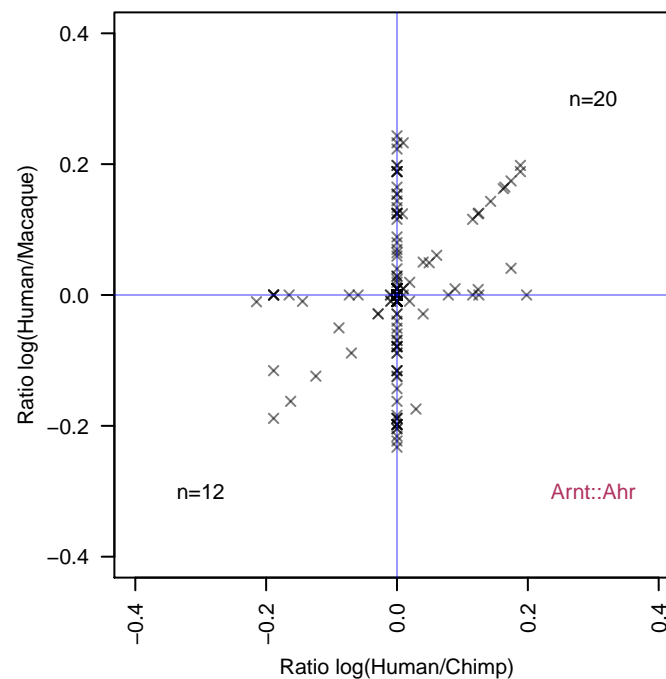

commonFibroblast.final.bed

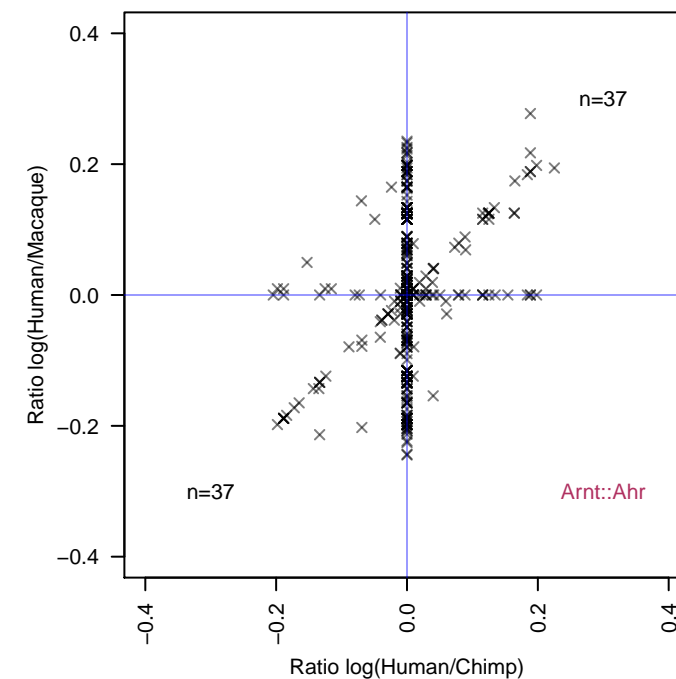

ChimpUpFibroblast.final.bed

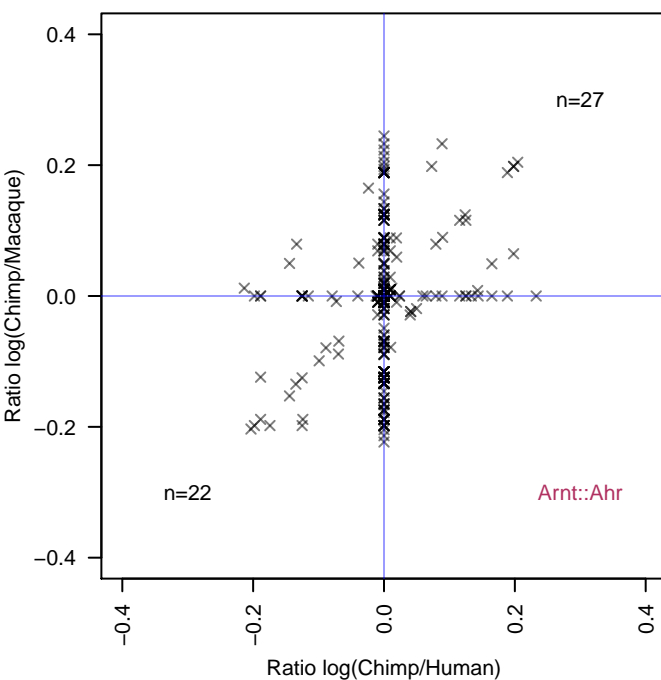

ChimpDownFibroblast.final.bed

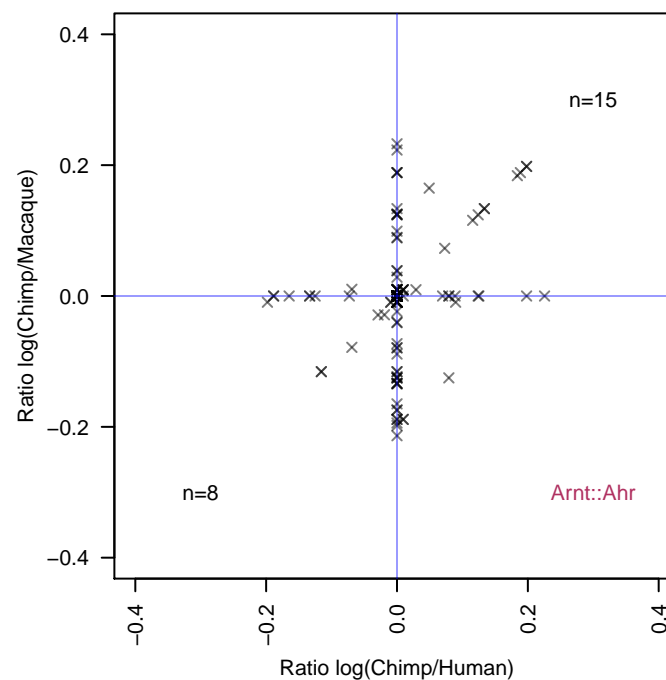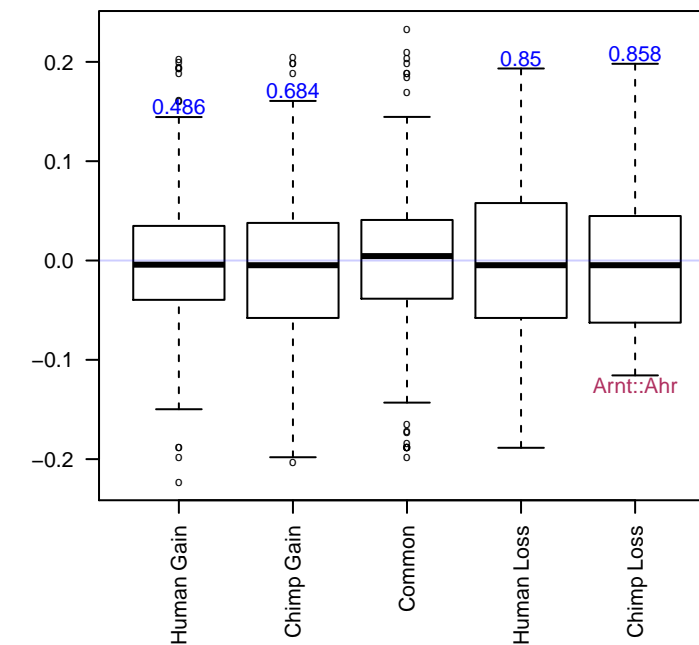

4

HumanUpFibroblast.final.bed

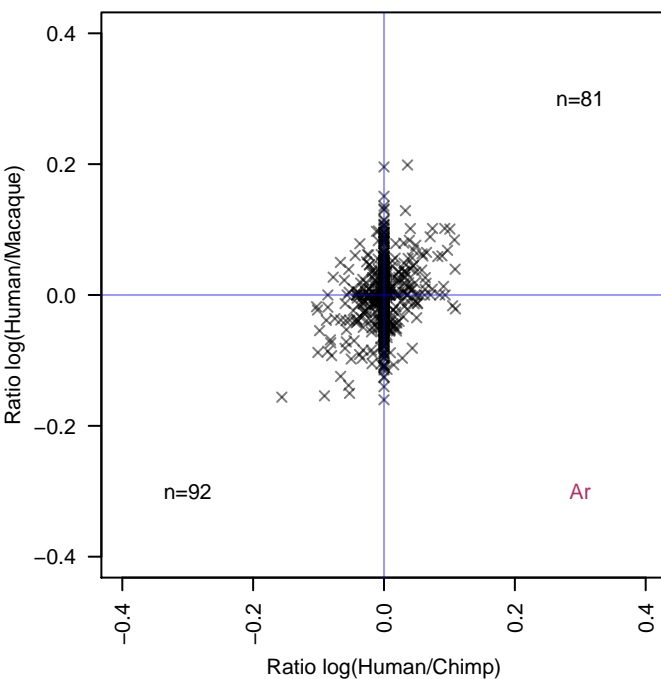

HumanDownFibroblast.final.bed

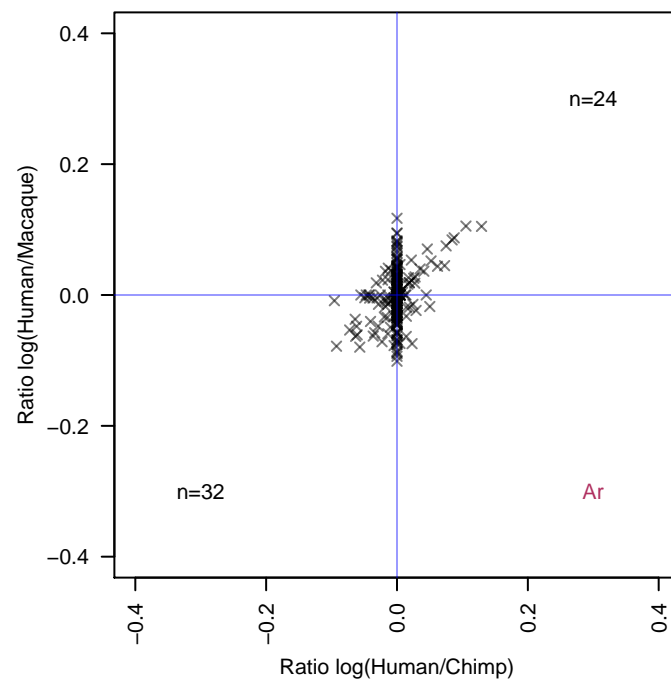

commonFibroblast.final.bed

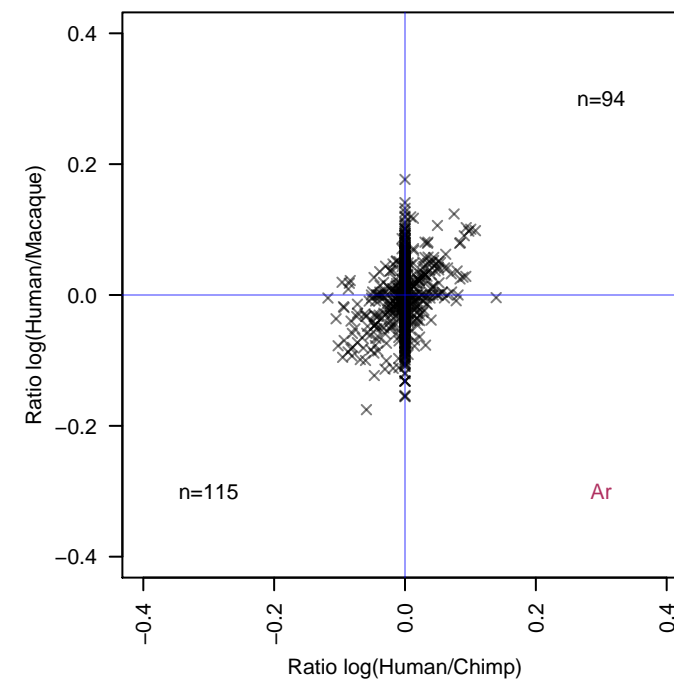

ChimpUpFibroblast.final.bed

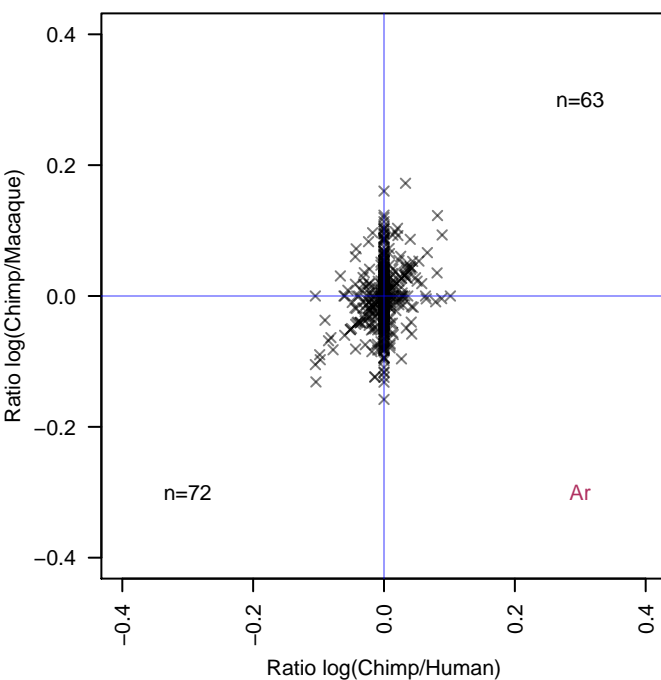

ChimpDownFibroblast.final.bed

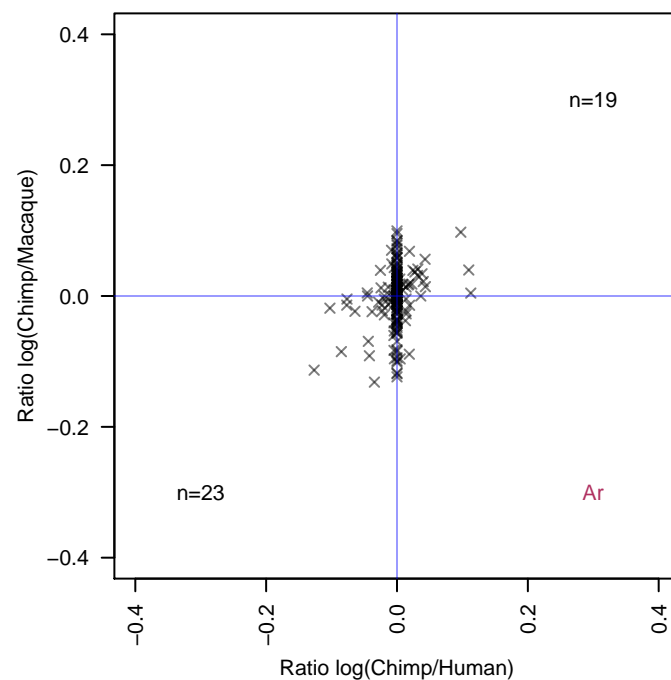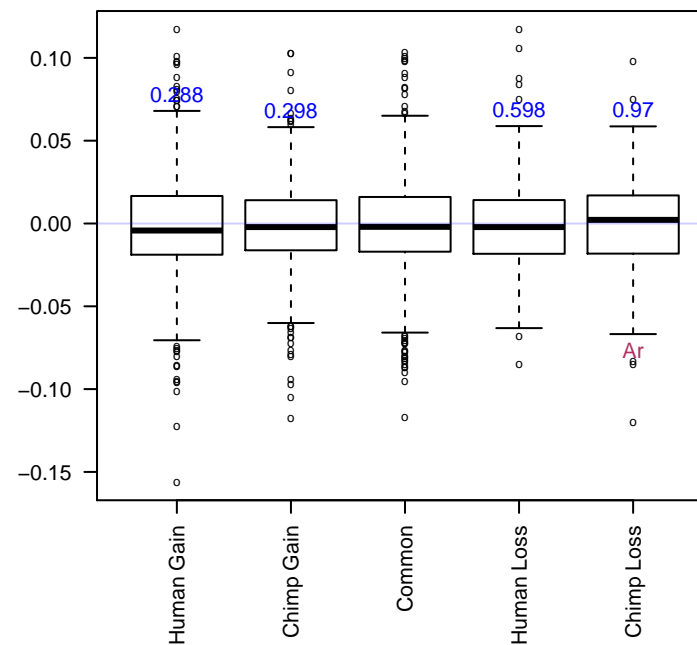

5

HumanUpFibroblast.final.bed

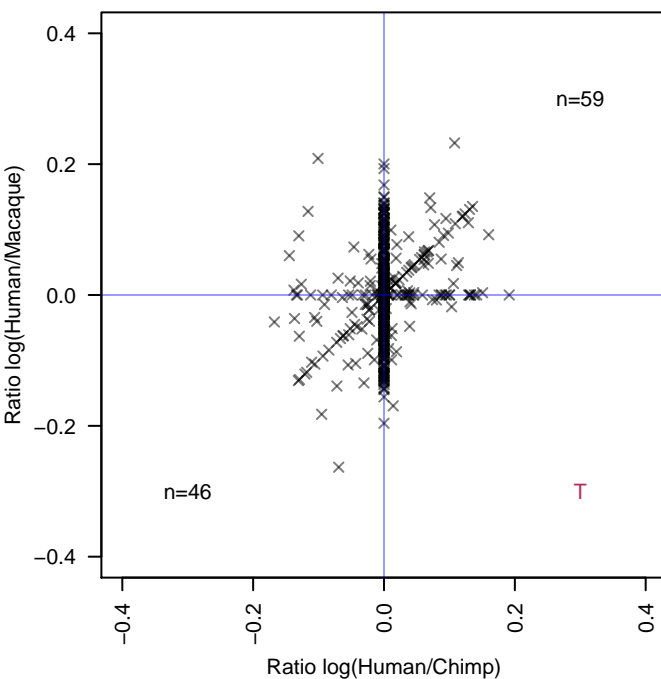

HumanDownFibroblast.final.bed

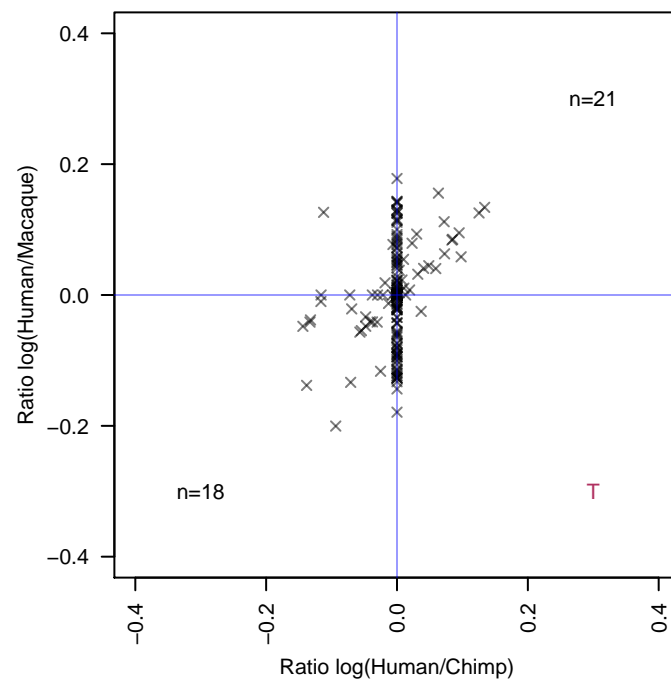

commonFibroblast.final.bed

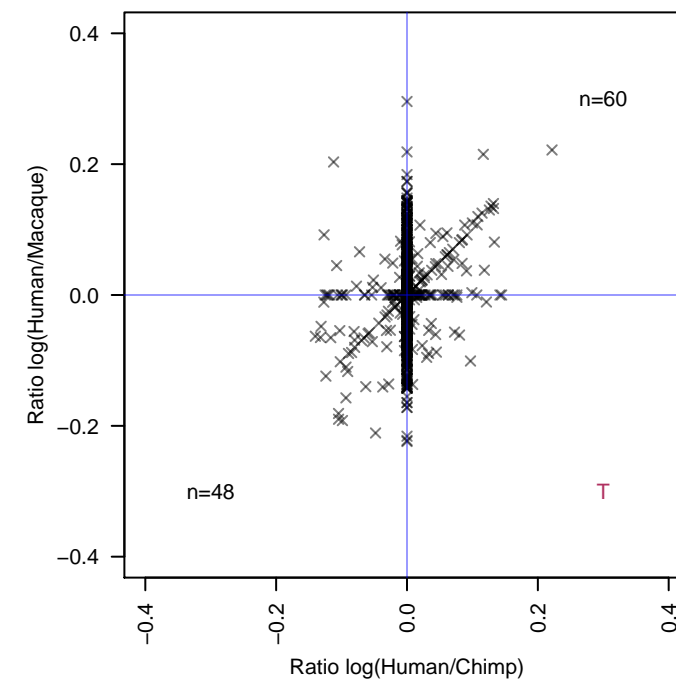

ChimpUpFibroblast.final.bed

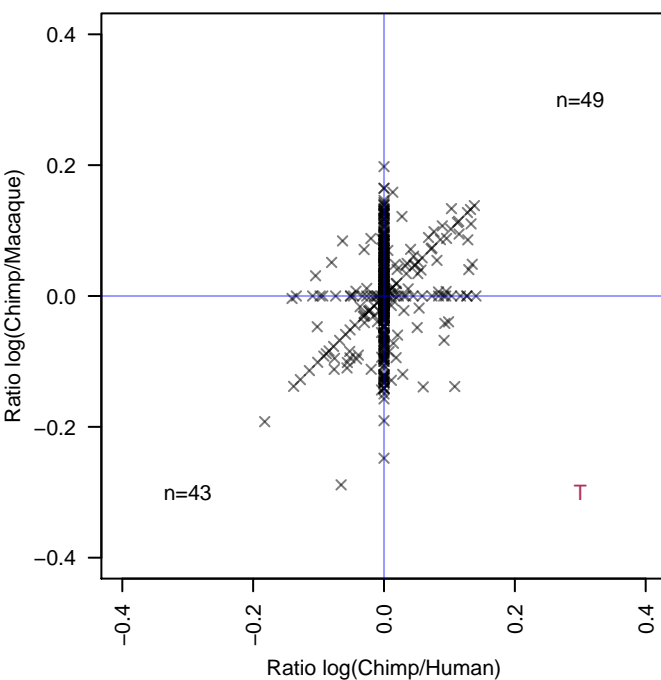

ChimpDownFibroblast.final.bed

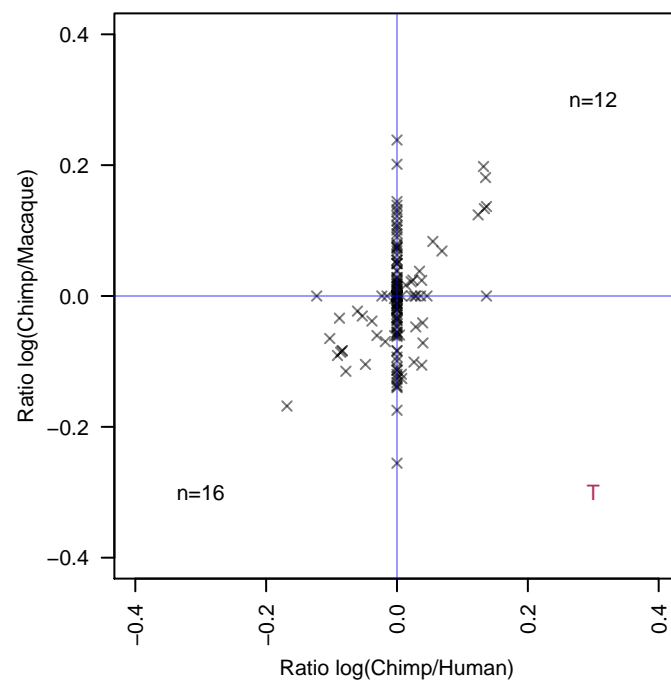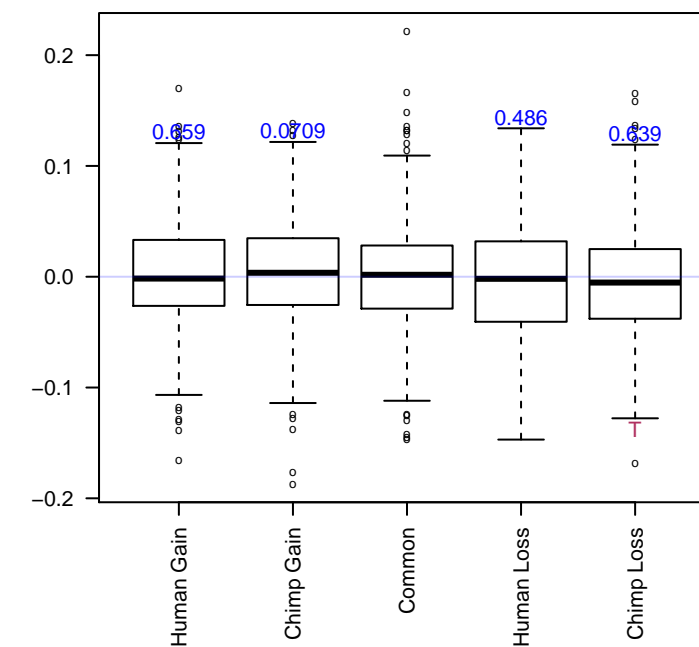

6

HumanUpFibroblast.final.bed

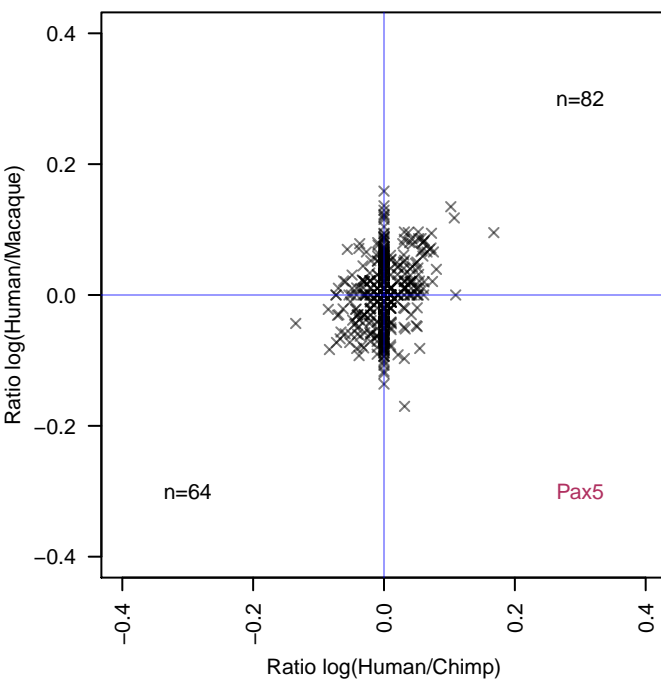

HumanDownFibroblast.final.bed

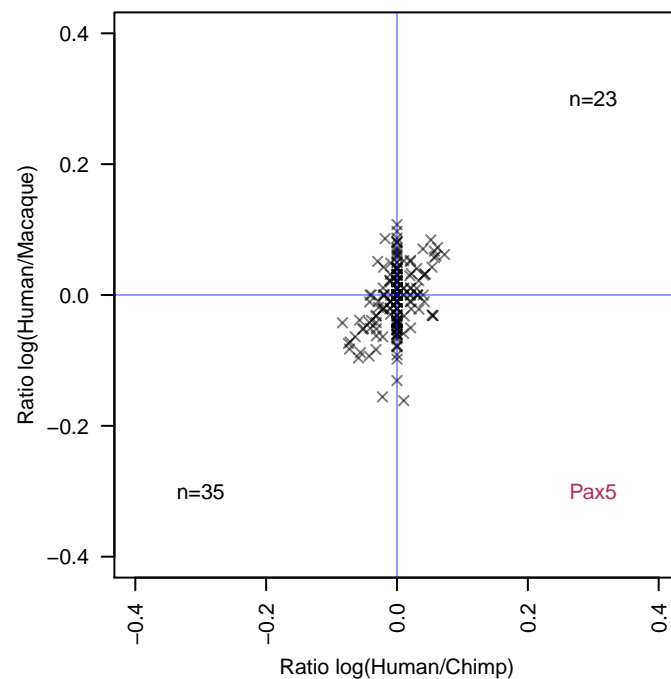

commonFibroblast.final.bed

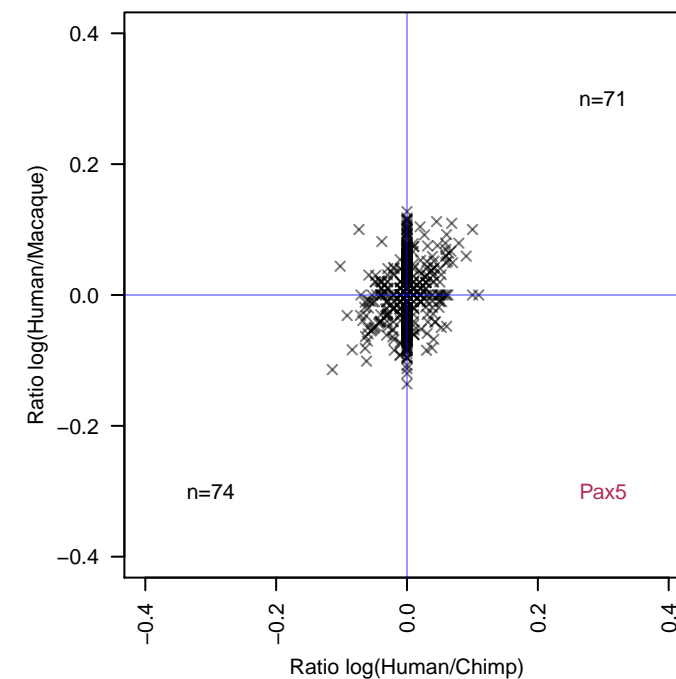

ChimpUpFibroblast.final.bed

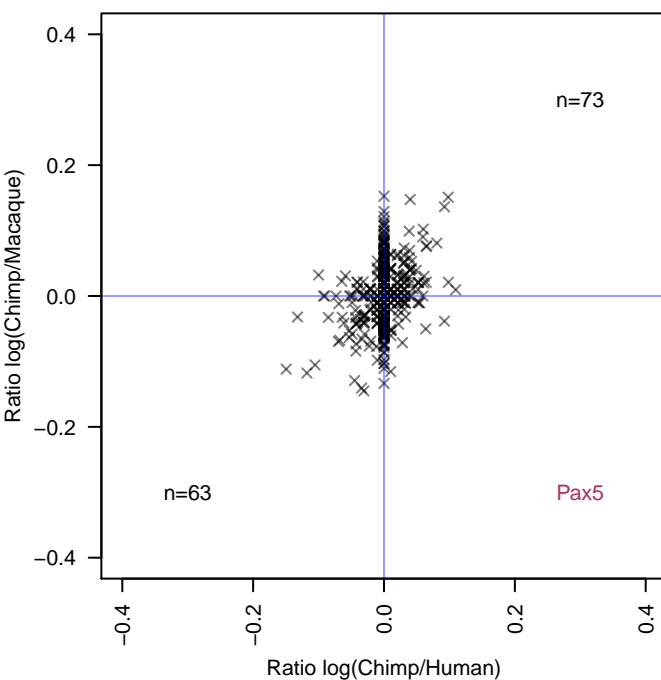

ChimpDownFibroblast.final.bed

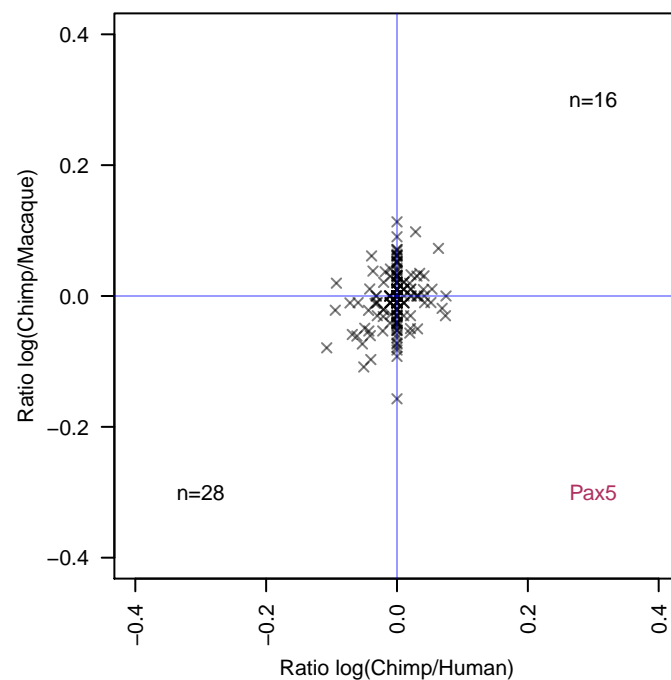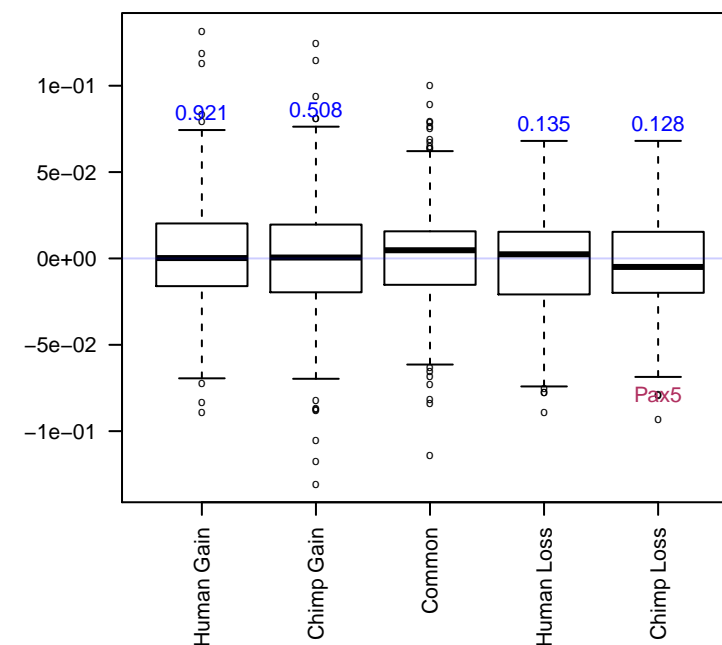

7

HumanUpFibroblast.final.bed

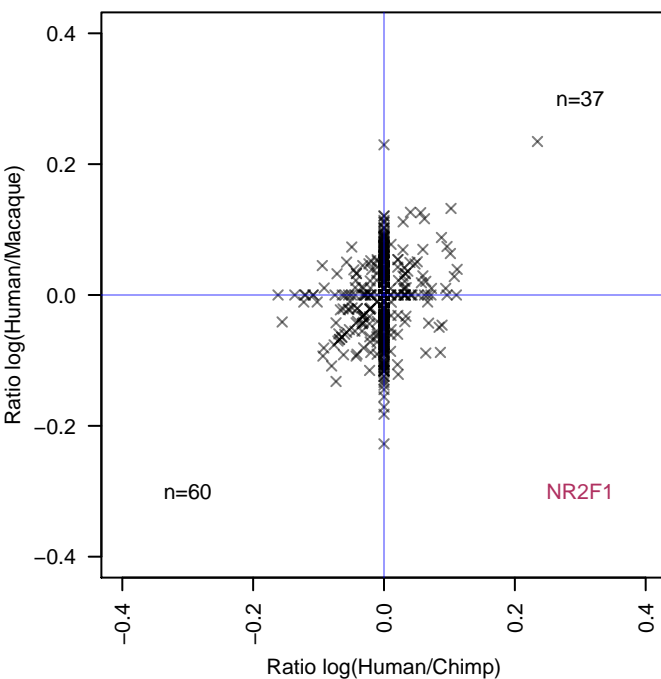

HumanDownFibroblast.final.bed

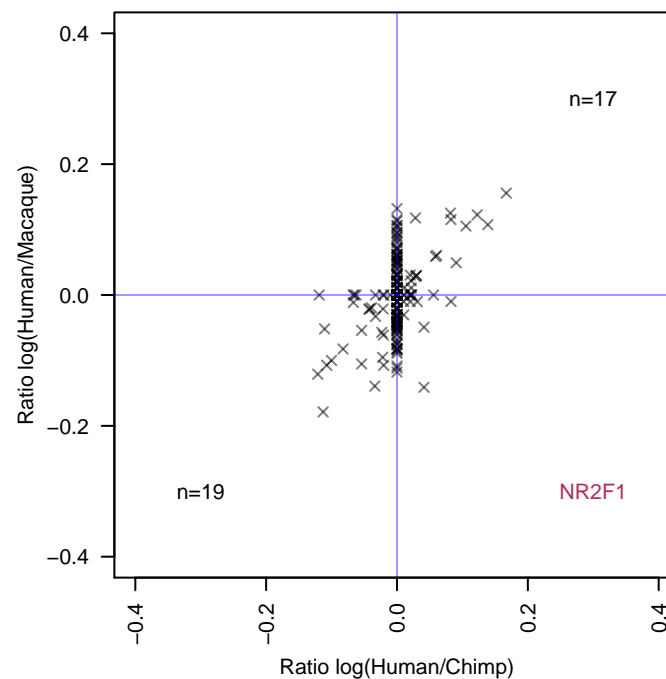

commonFibroblast.final.bed

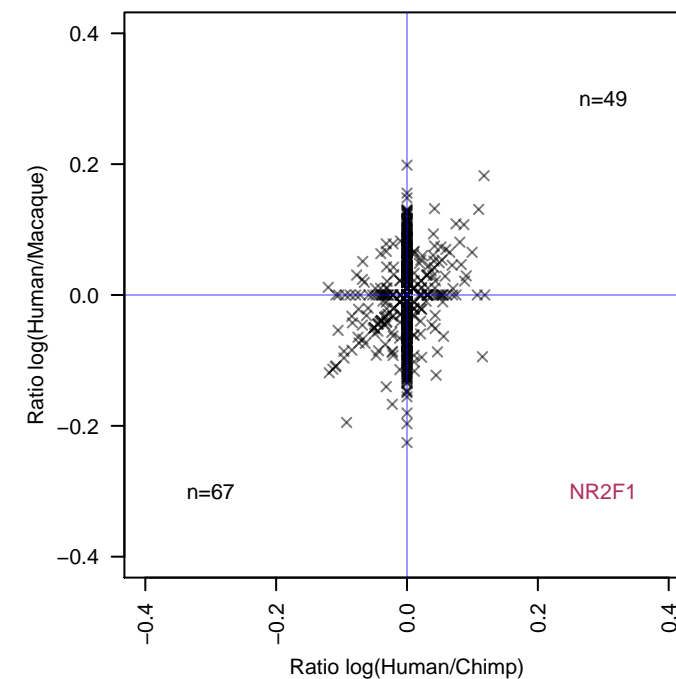

ChimpUpFibroblast.final.bed

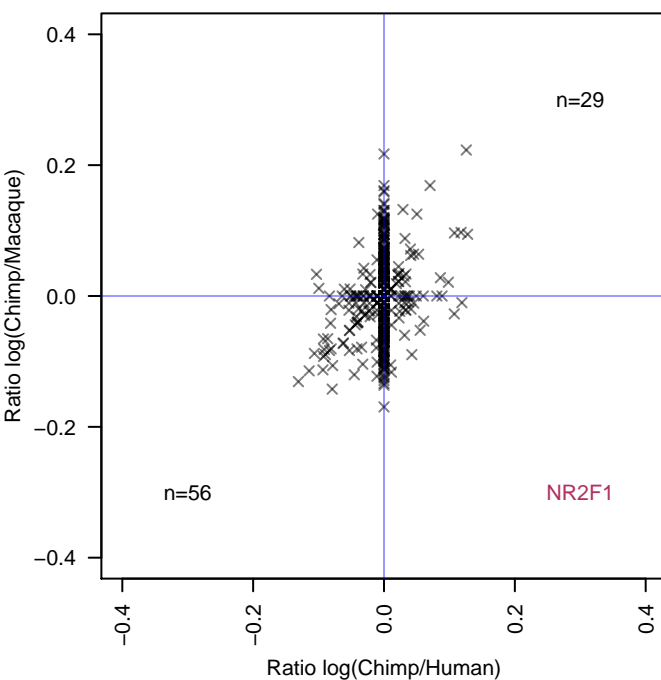

ChimpDownFibroblast.final.bed

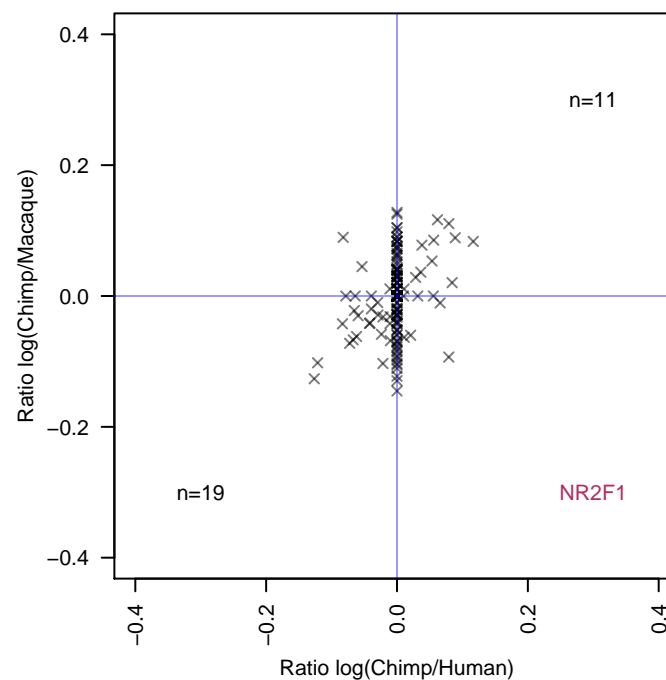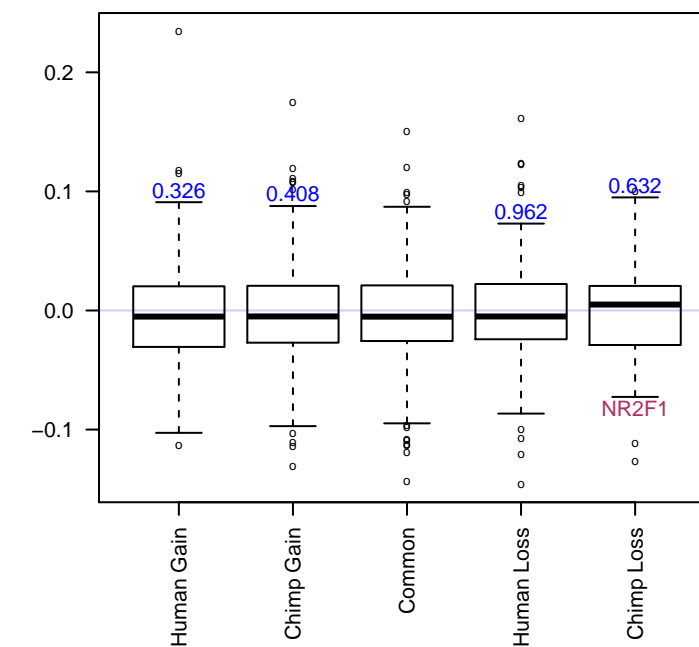

8

HumanUpFibroblast.final.bed

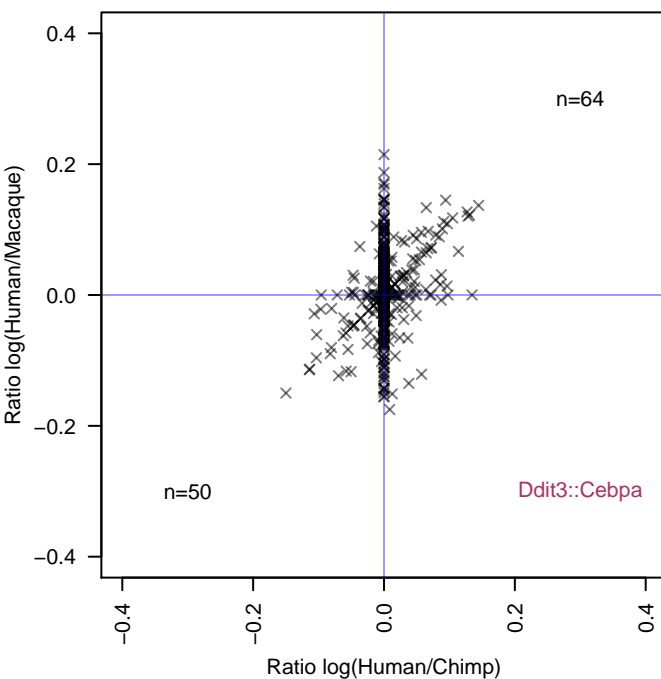

HumanDownFibroblast.final.bed

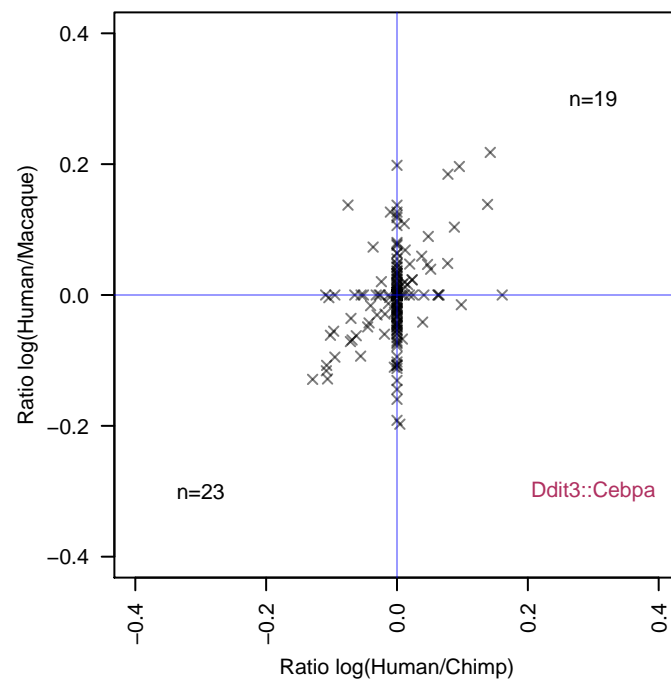

commonFibroblast.final.bed

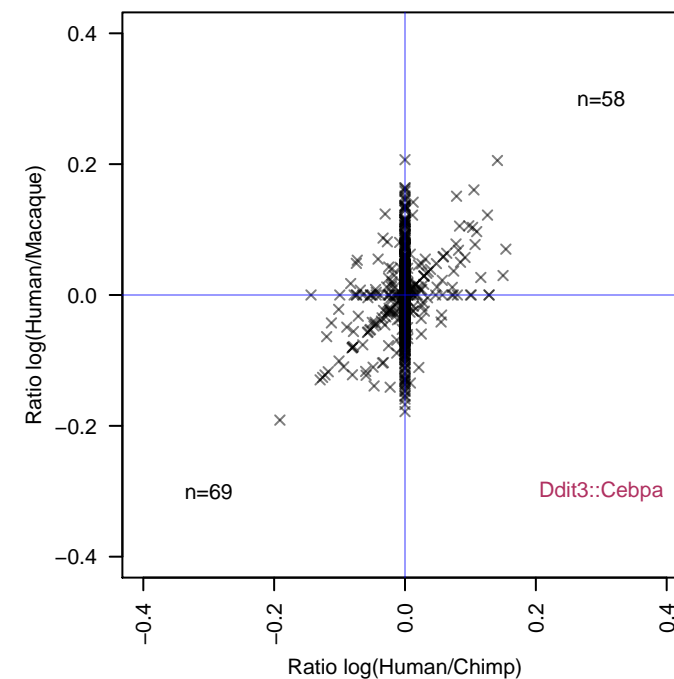

ChimpUpFibroblast.final.bed

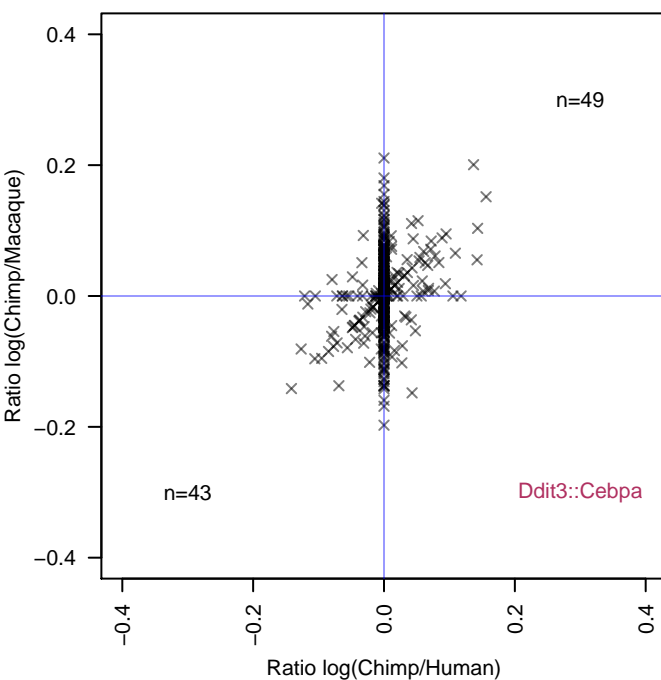

ChimpDownFibroblast.final.bed

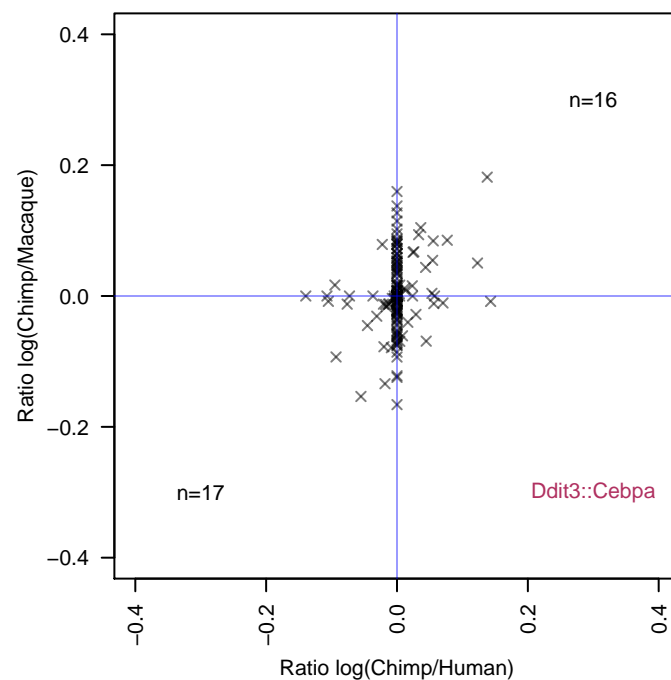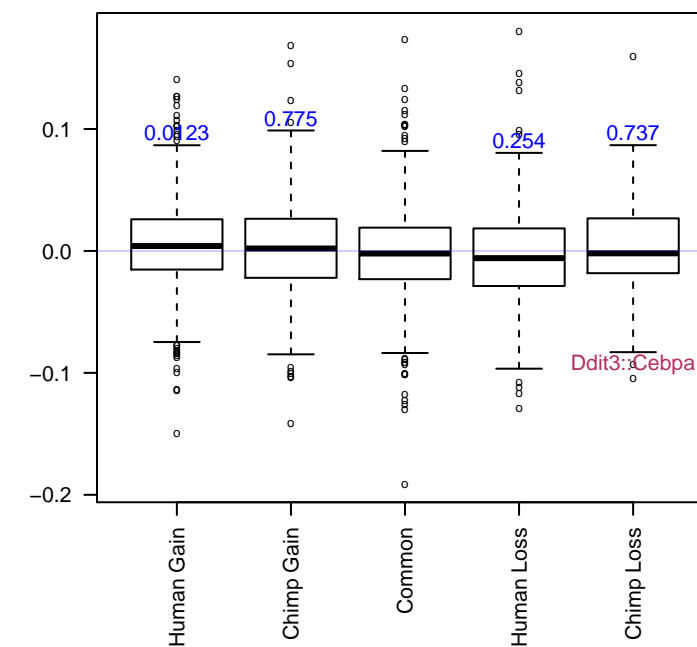

9

HumanUpFibroblast.final.bed

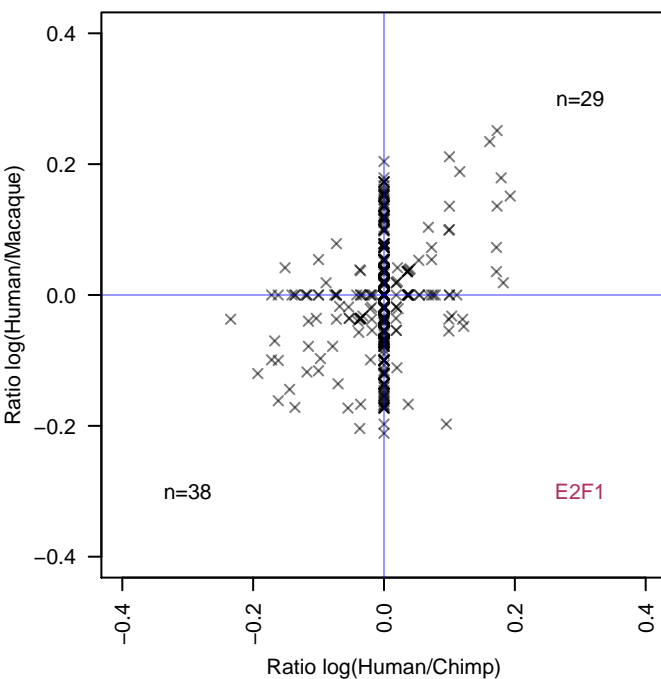

HumanDownFibroblast.final.bed

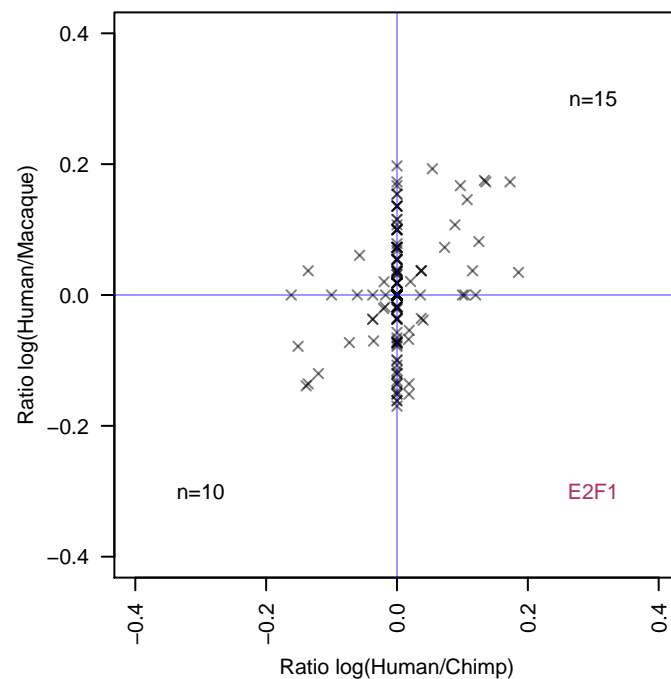

commonFibroblast.final.bed

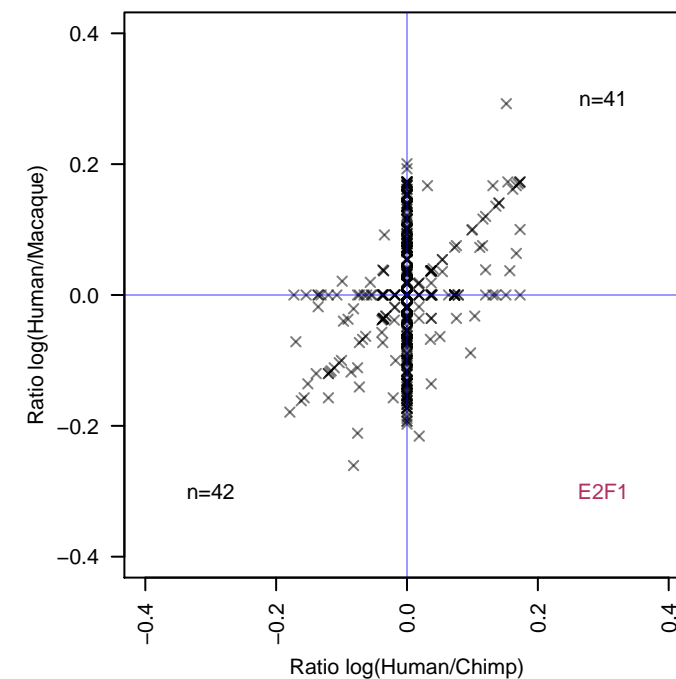

ChimpUpFibroblast.final.bed

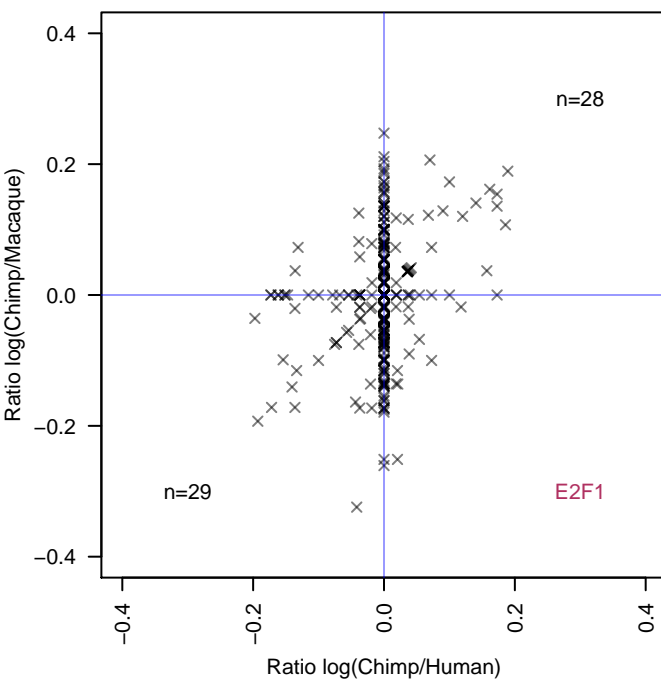

ChimpDownFibroblast.final.bed

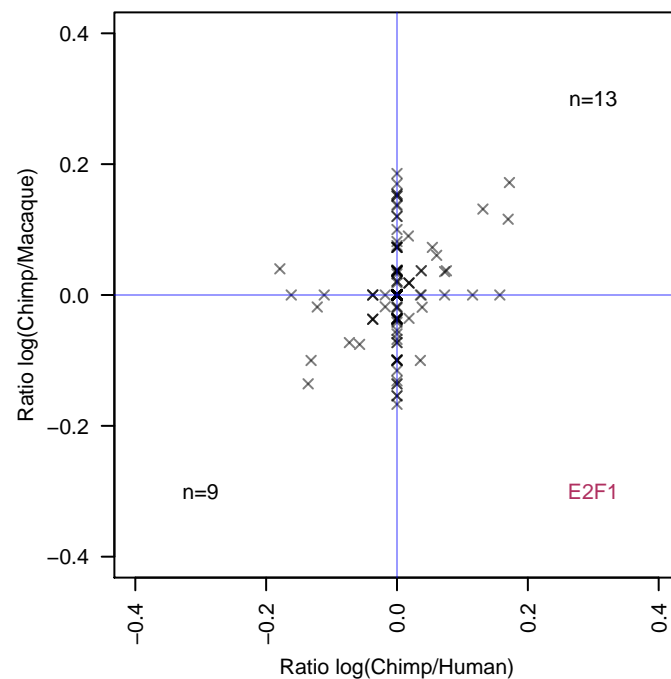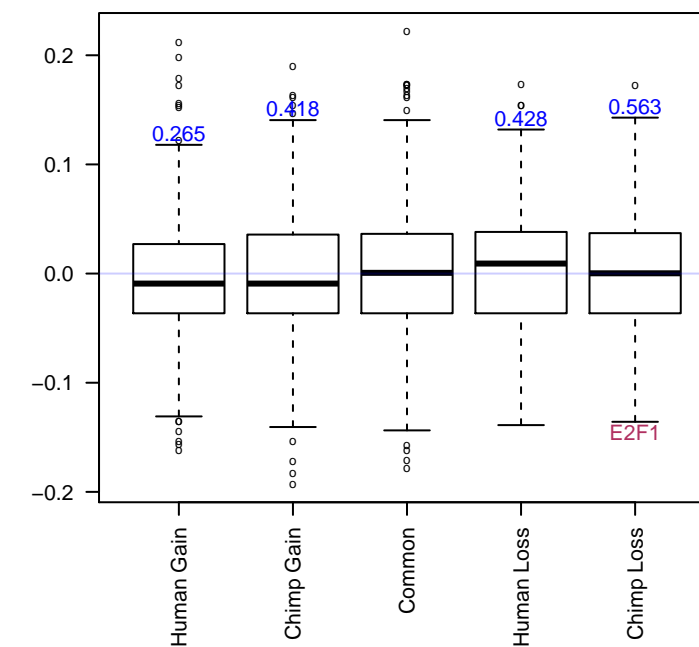

10

HumanUpFibroblast.final.bed

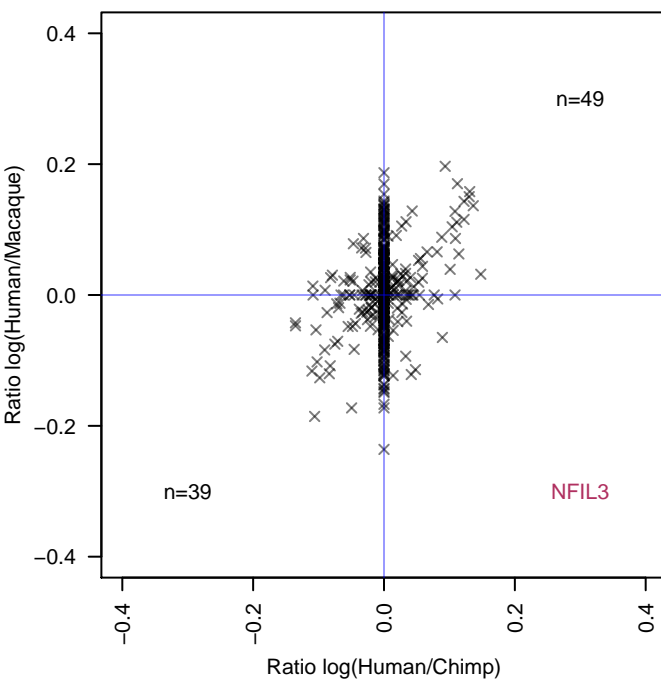

HumanDownFibroblast.final.bed

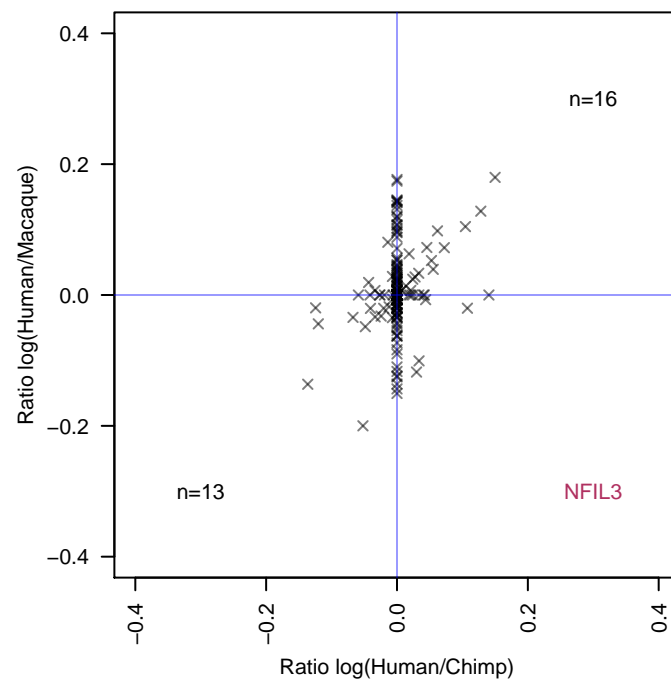

commonFibroblast.final.bed

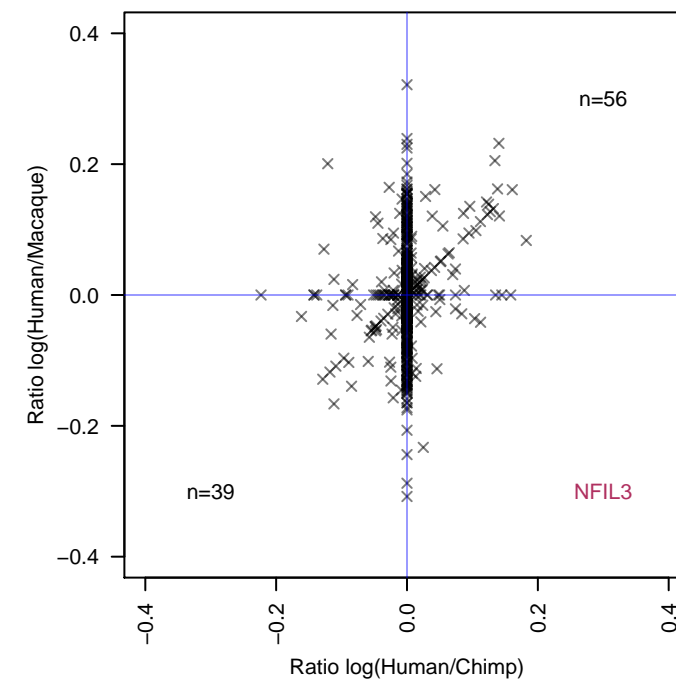

ChimpUpFibroblast.final.bed

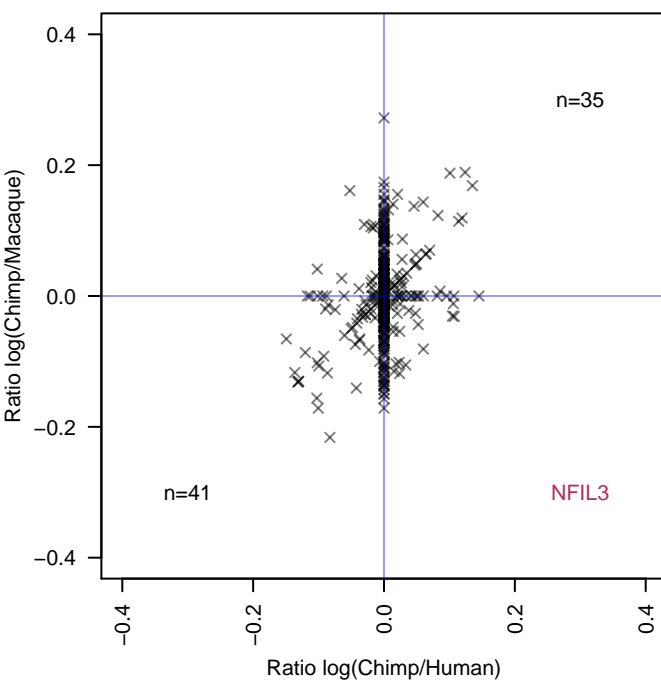

ChimpDownFibroblast.final.bed

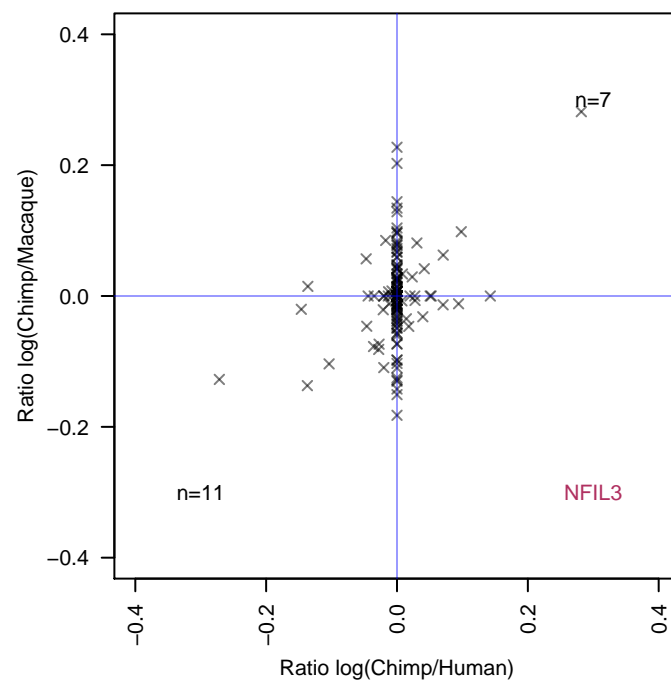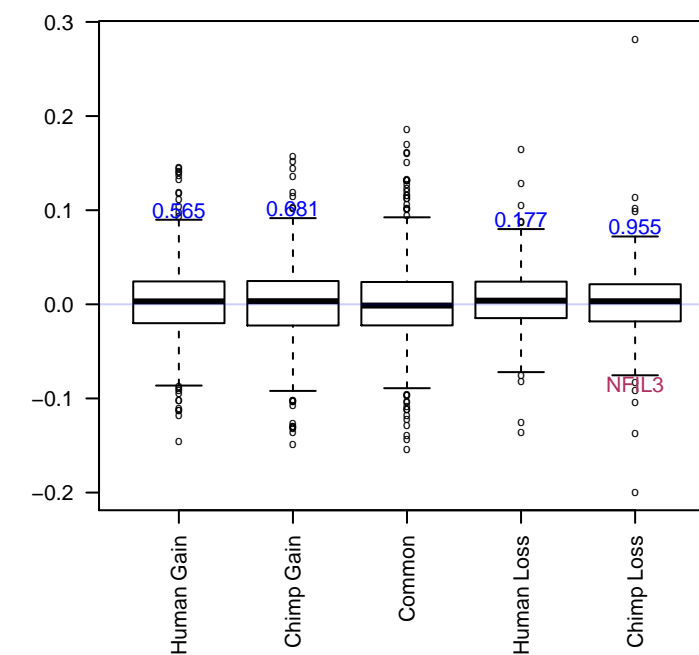

11

HumanUpFibroblast.final.bed

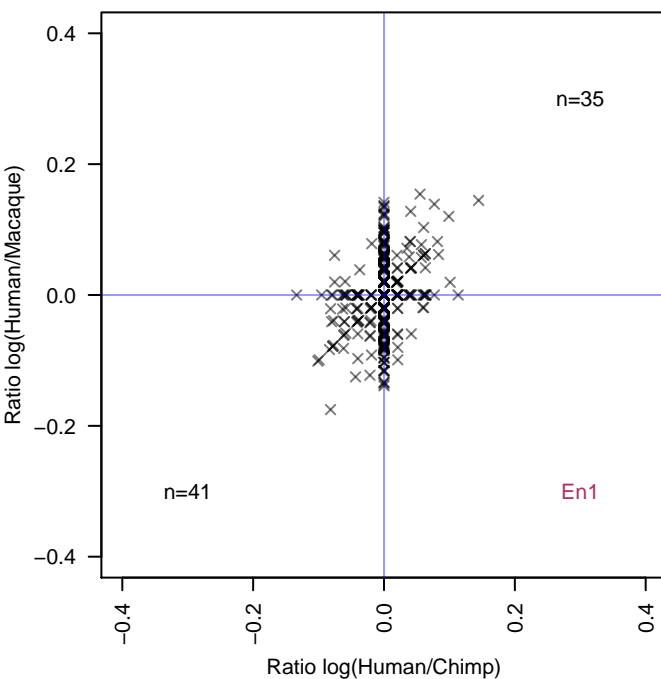

HumanDownFibroblast.final.bed

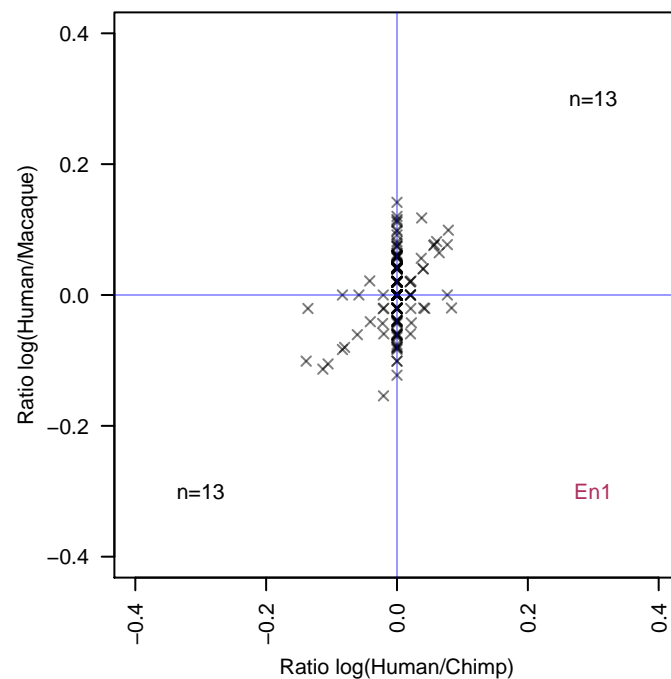

commonFibroblast.final.bed

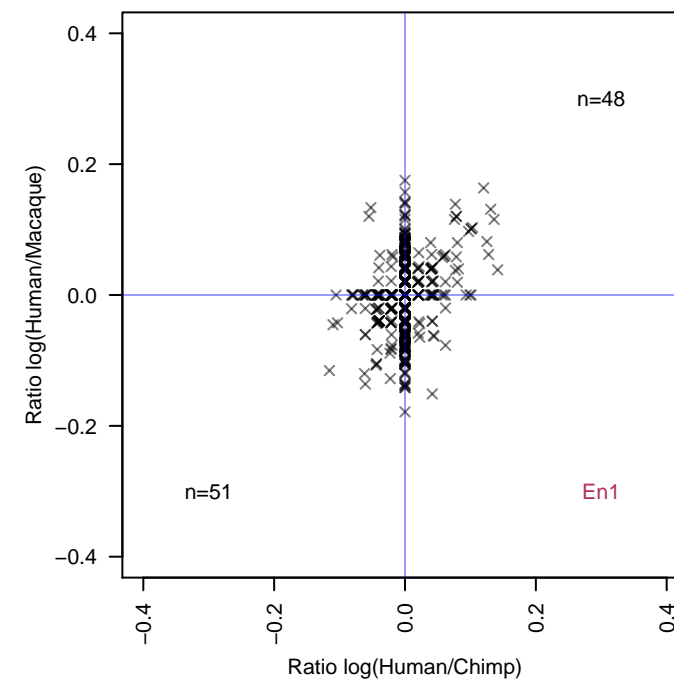

ChimpUpFibroblast.final.bed

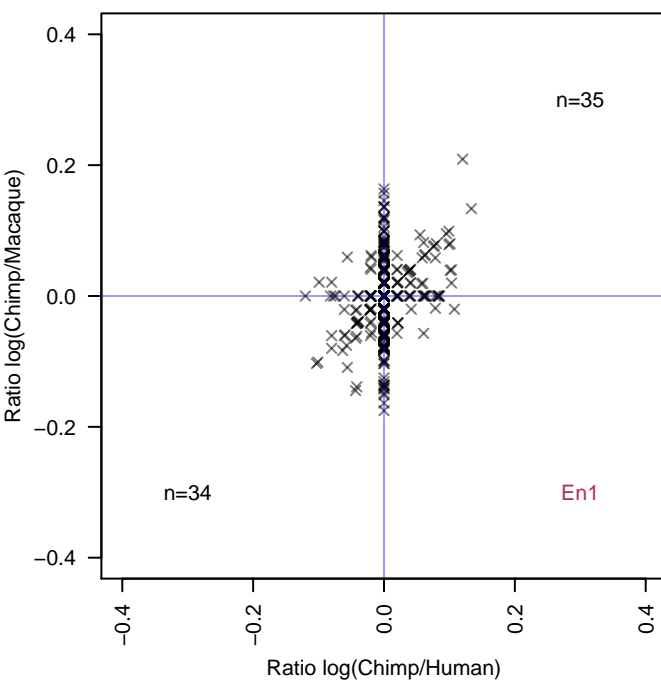

ChimpDownFibroblast.final.bed

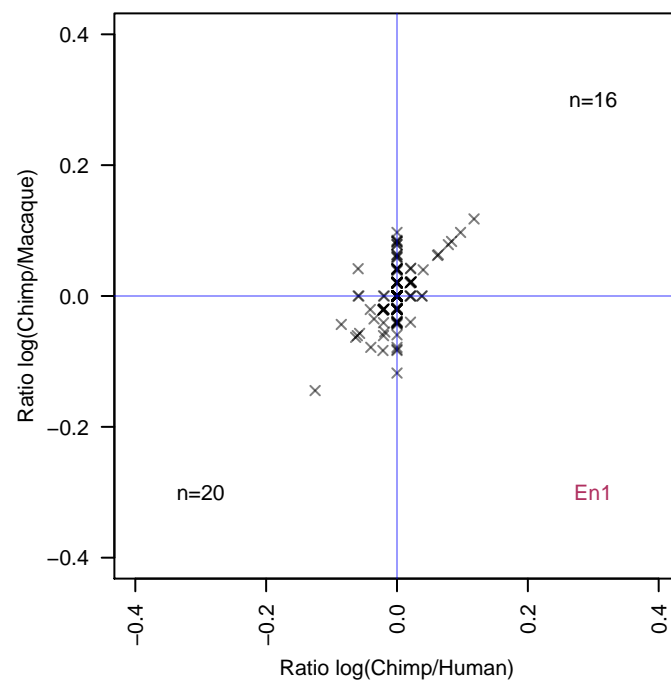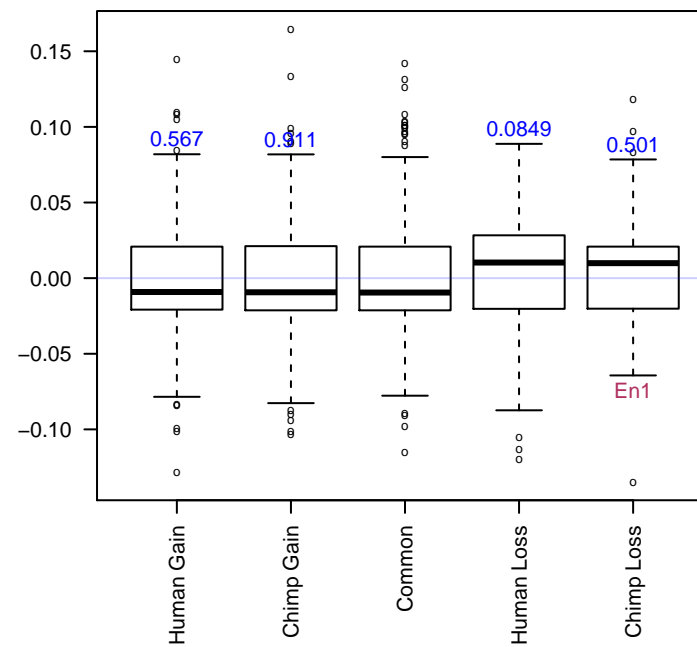

12

HumanUpFibroblast.final.bed

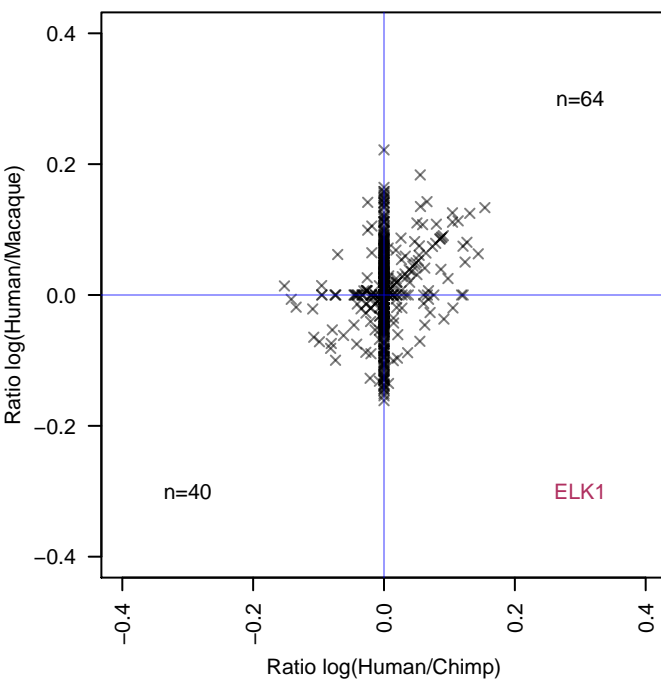

HumanDownFibroblast.final.bed

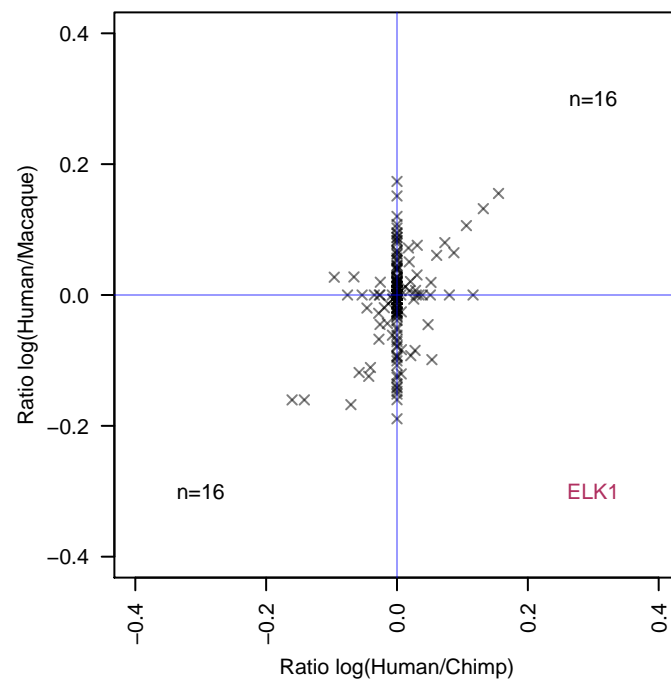

commonFibroblast.final.bed

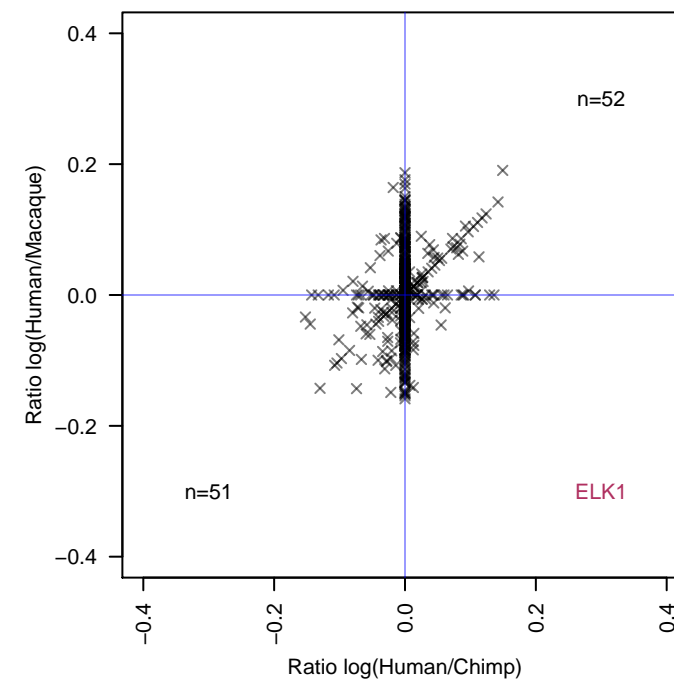

ChimpUpFibroblast.final.bed

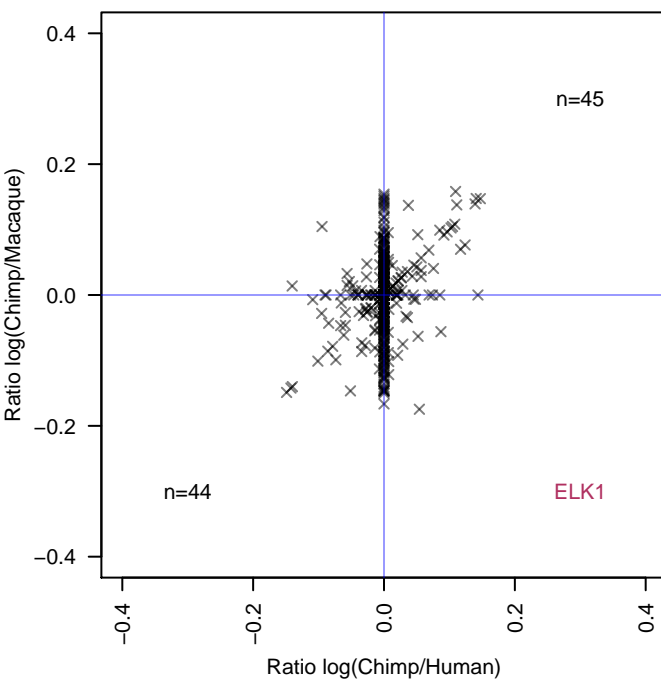

ChimpDownFibroblast.final.bed

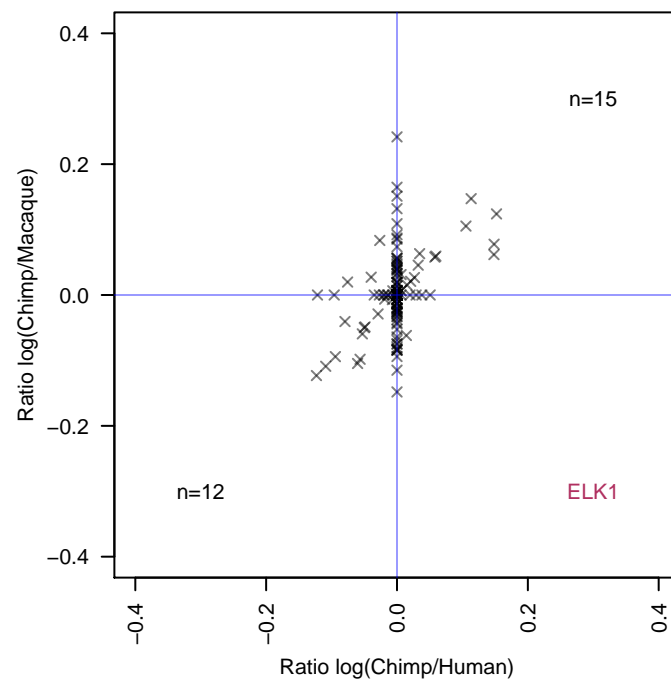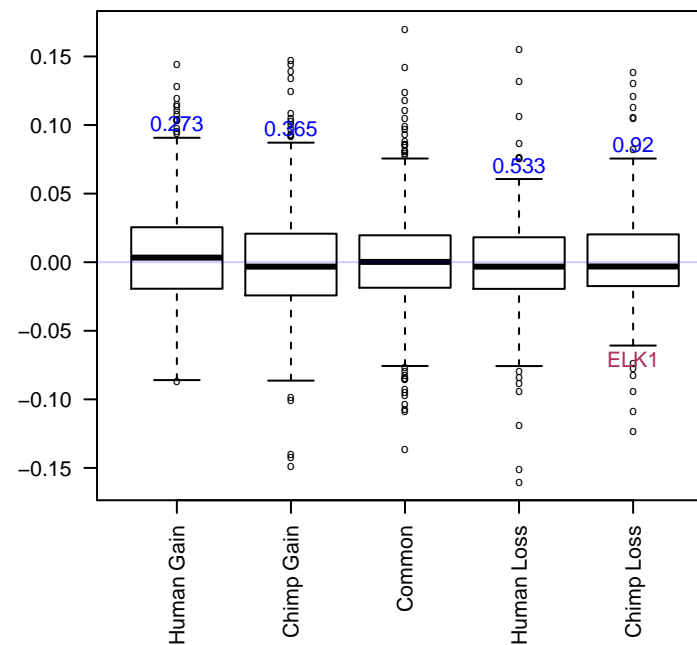

13 HumanUpFibroblast.final.bed

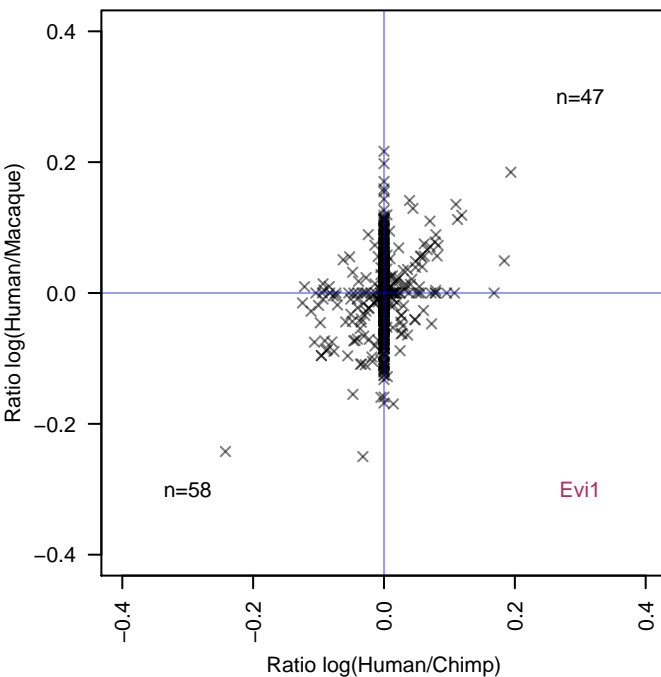

HumanDownFibroblast.final.bed

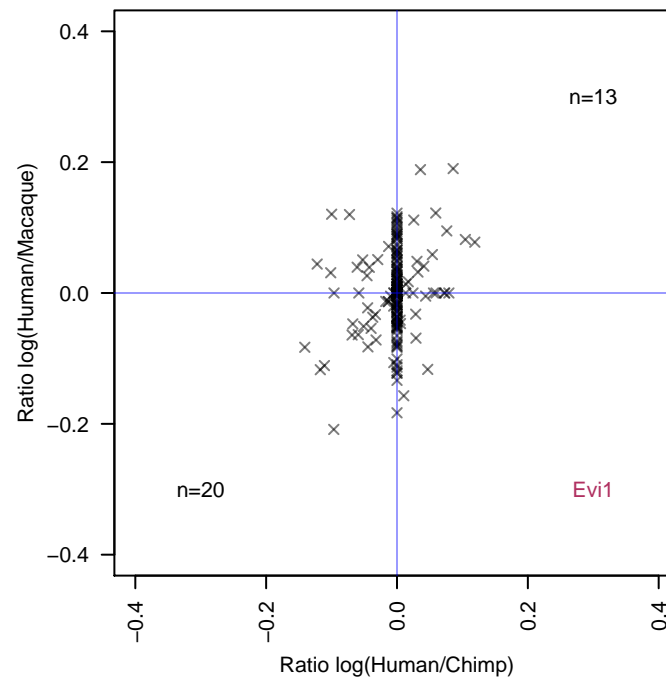

commonFibroblast.final.bed

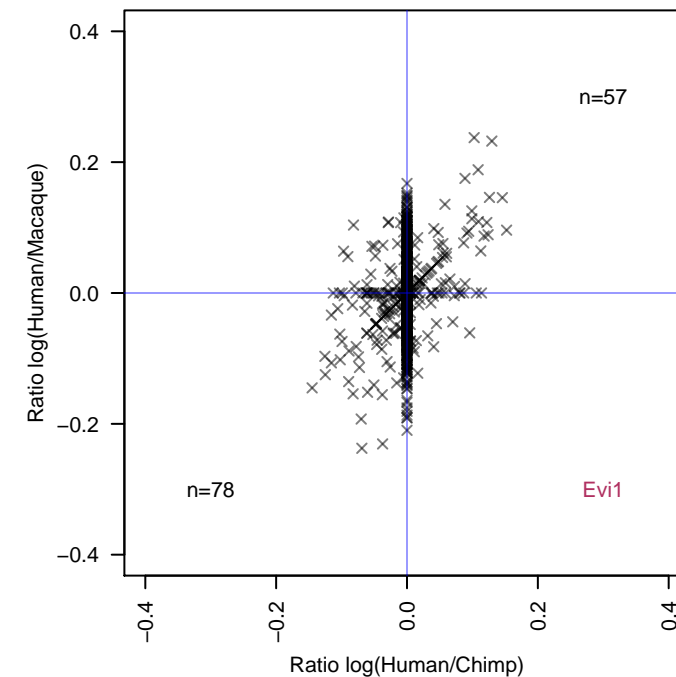

ChimpUpFibroblast.final.bed

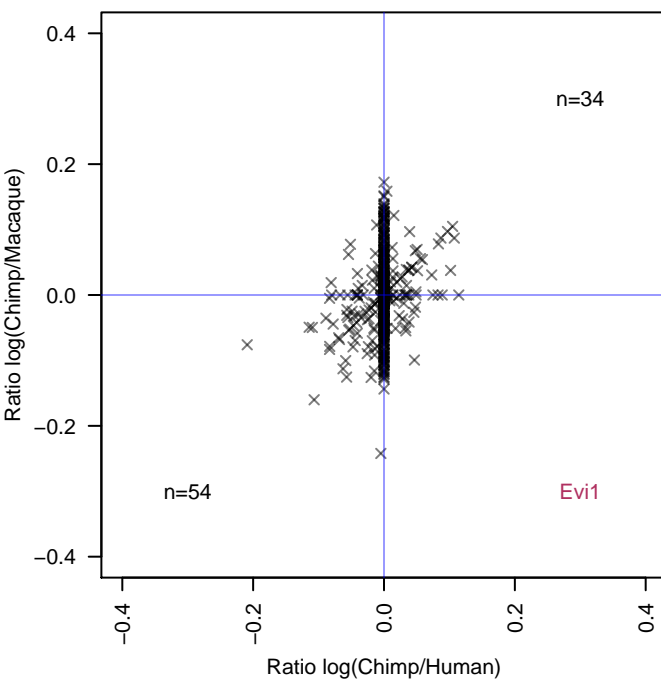

ChimpDownFibroblast.final.bed

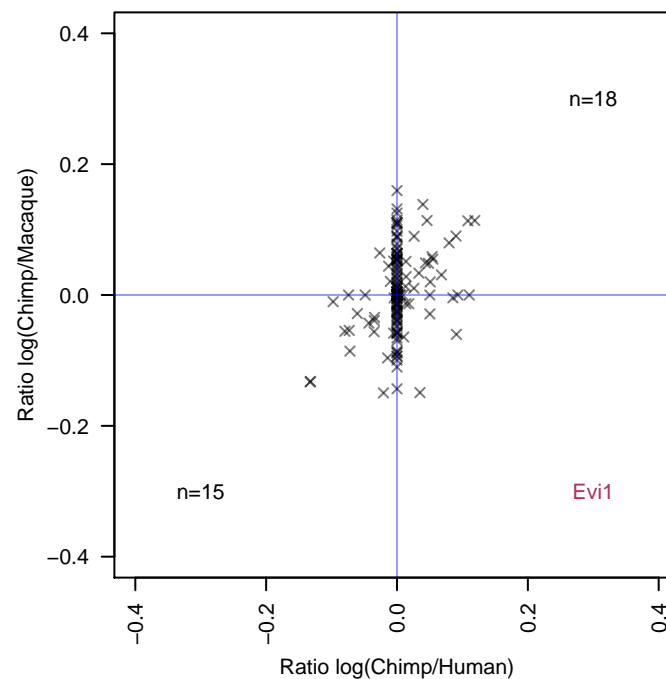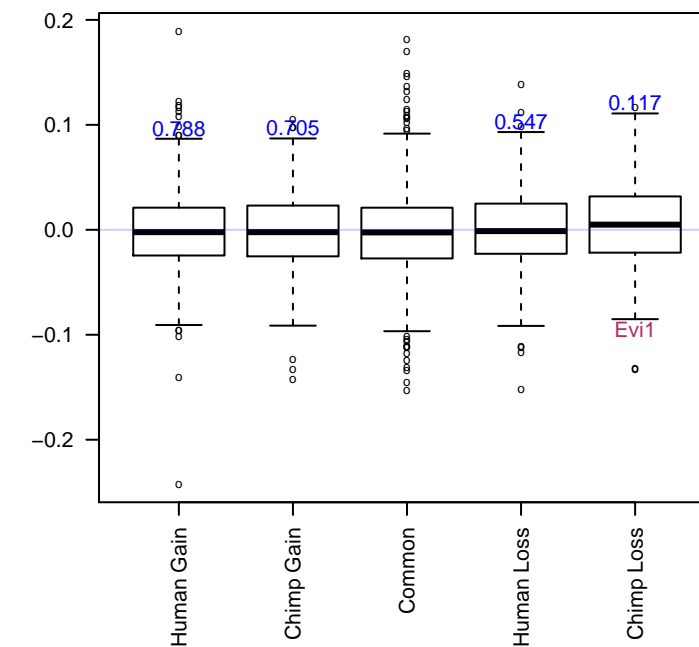

14

HumanUpFibroblast.final.bed

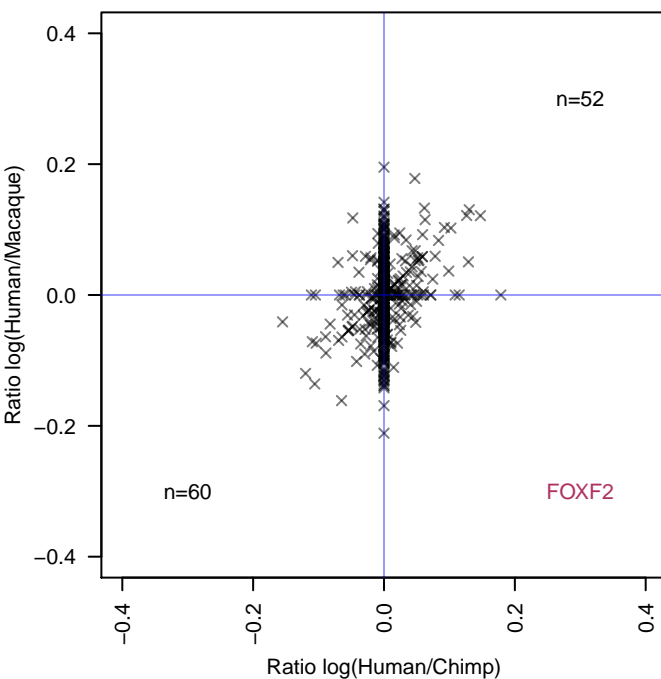

HumanDownFibroblast.final.bed

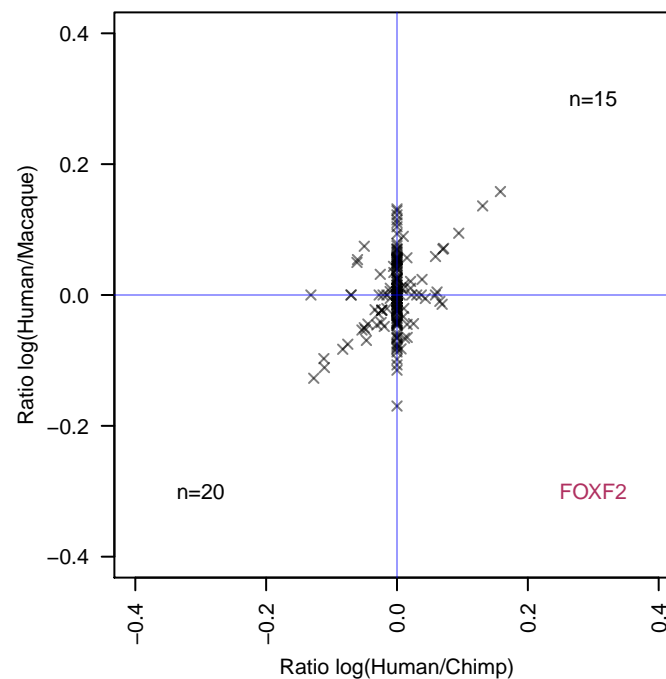

commonFibroblast.final.bed

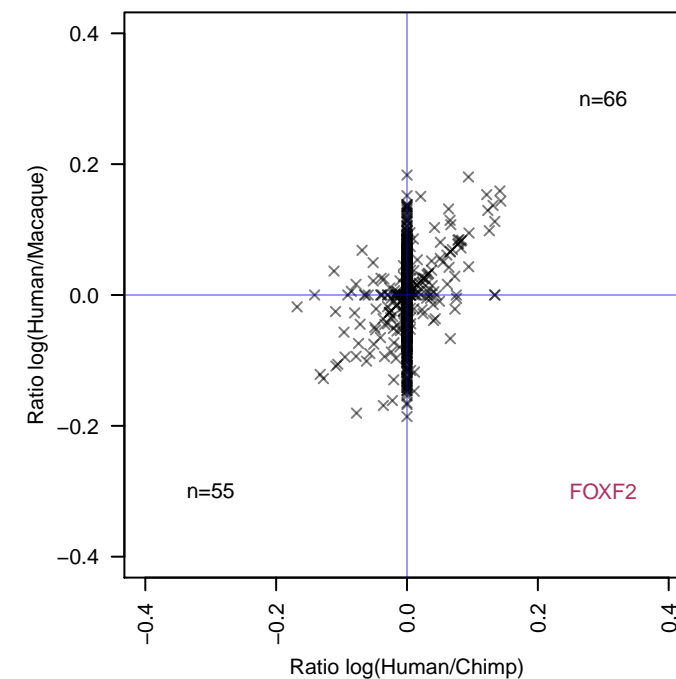

ChimpUpFibroblast.final.bed

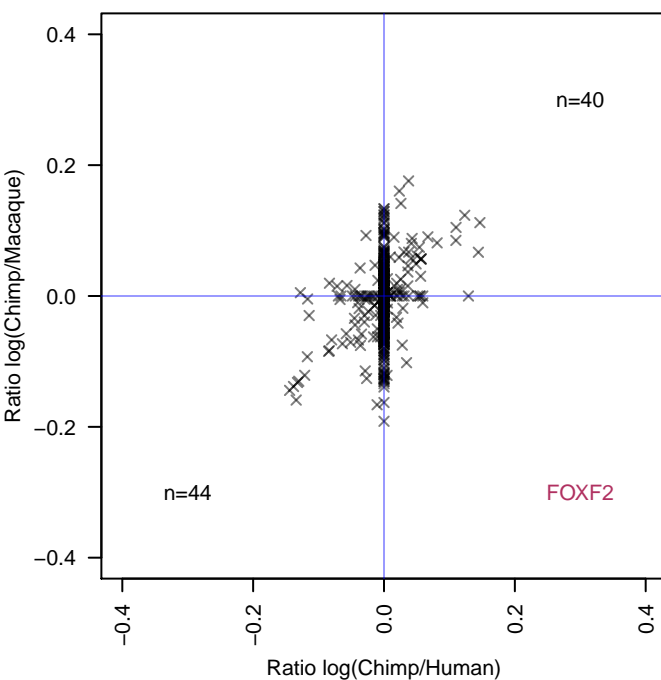

ChimpDownFibroblast.final.bed

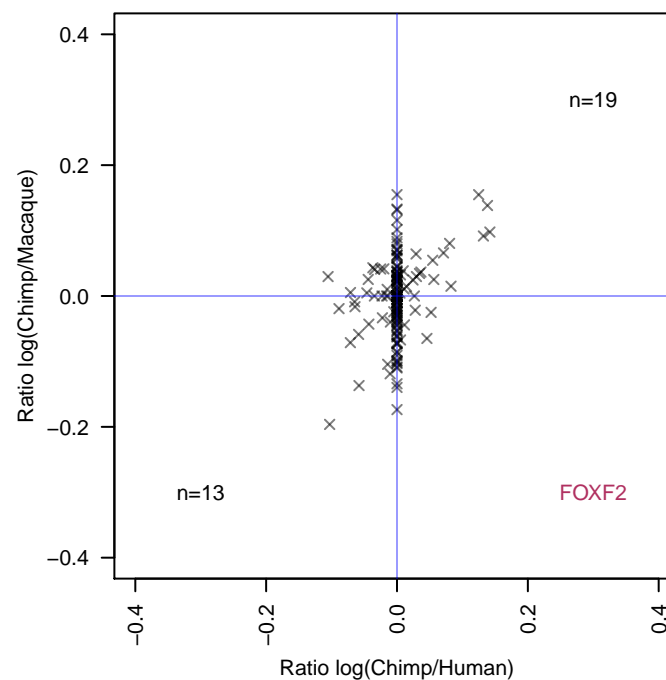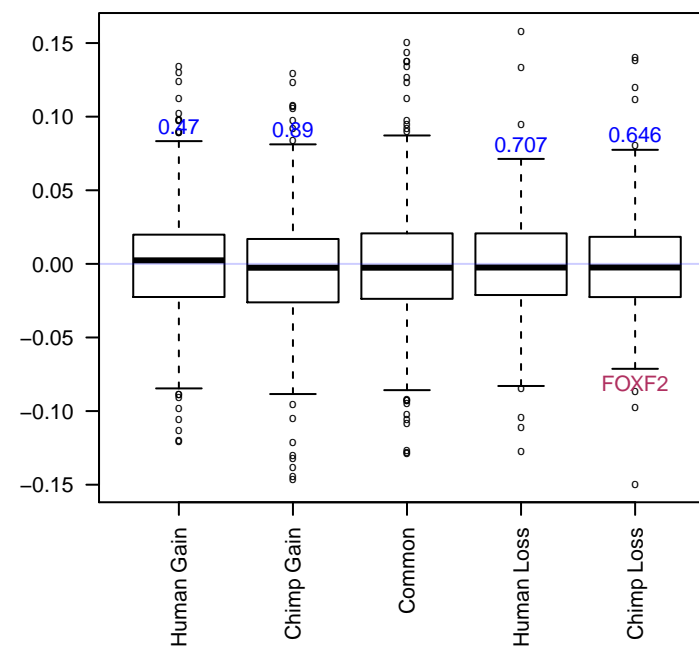

15

HumanUpFibroblast.final.bed

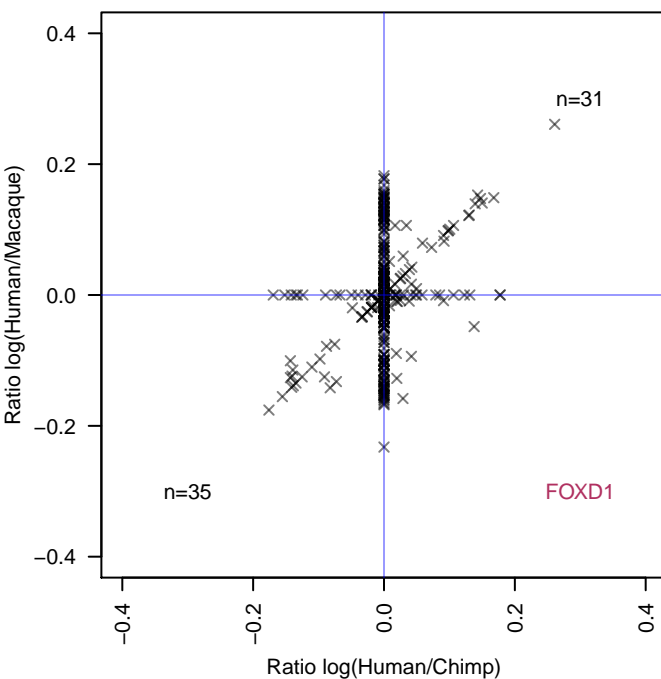

HumanDownFibroblast.final.bed

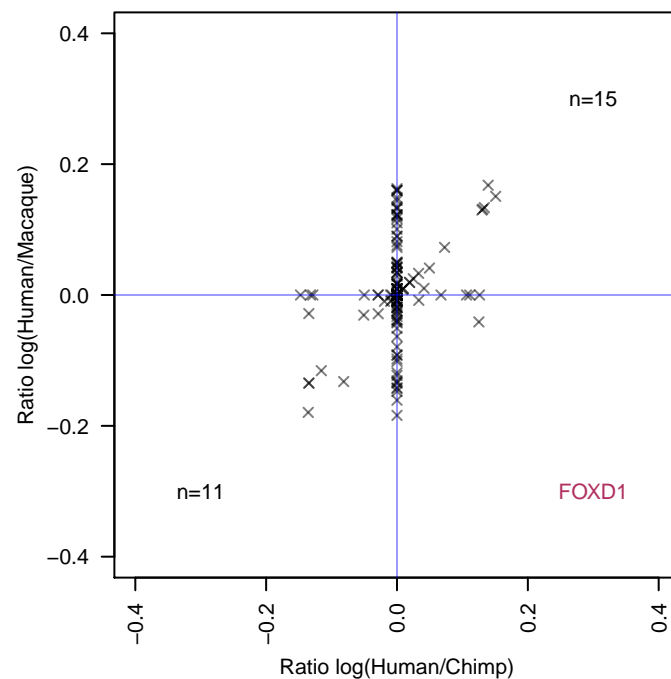

commonFibroblast.final.bed

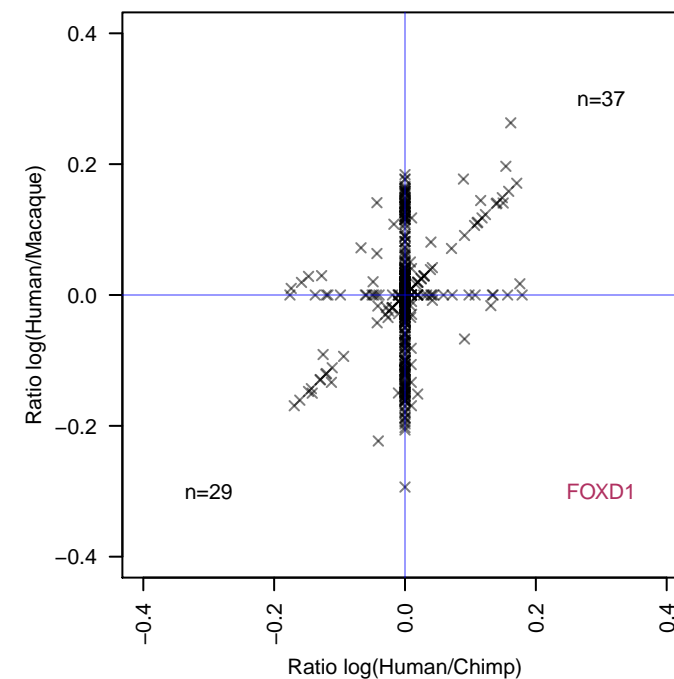

ChimpUpFibroblast.final.bed

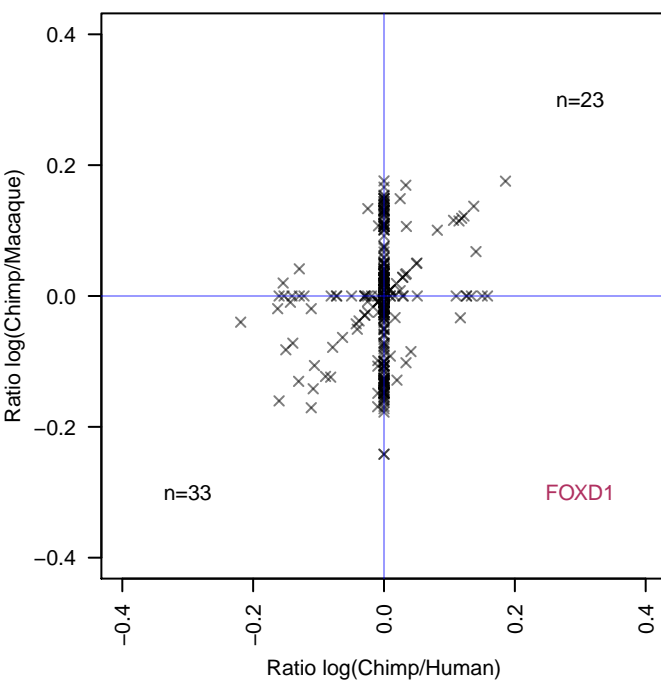

ChimpDownFibroblast.final.bed

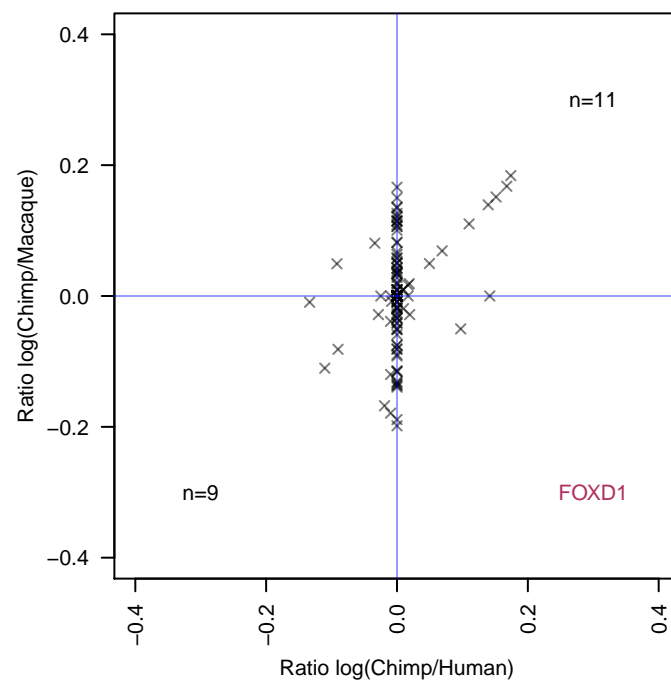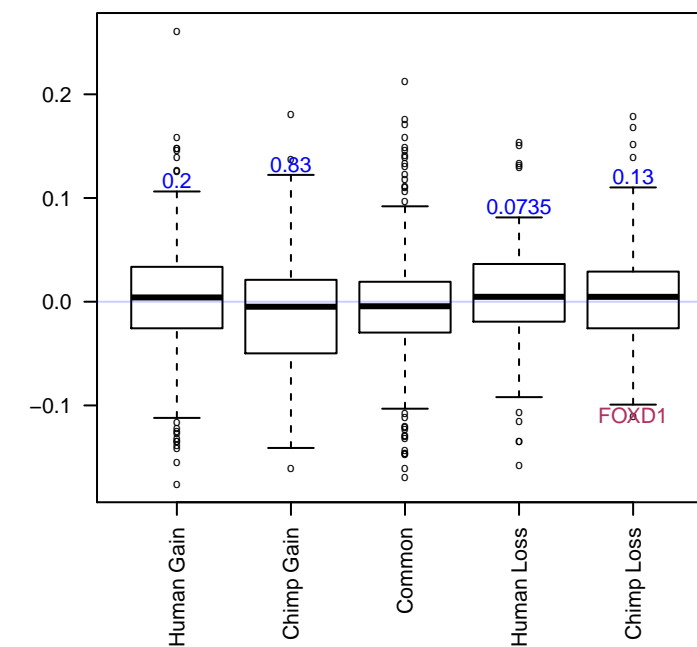

16

HumanUpFibroblast.final.bed

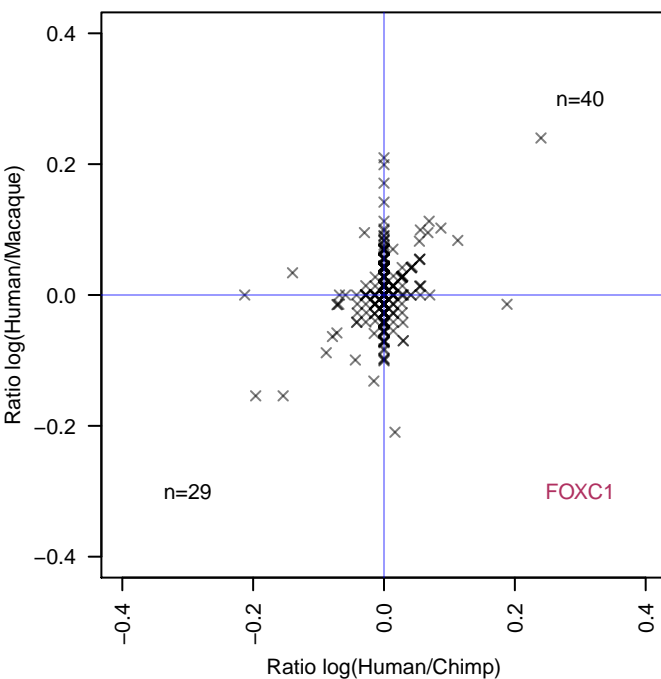

HumanDownFibroblast.final.bed

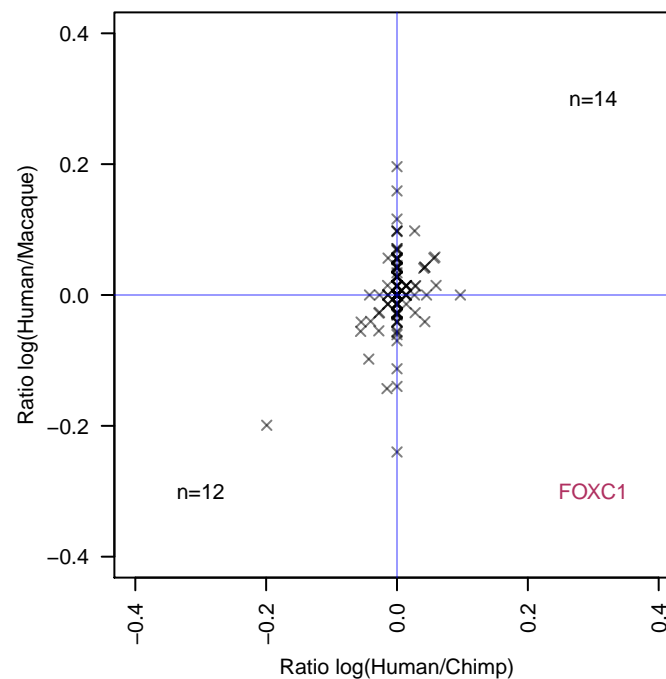

commonFibroblast.final.bed

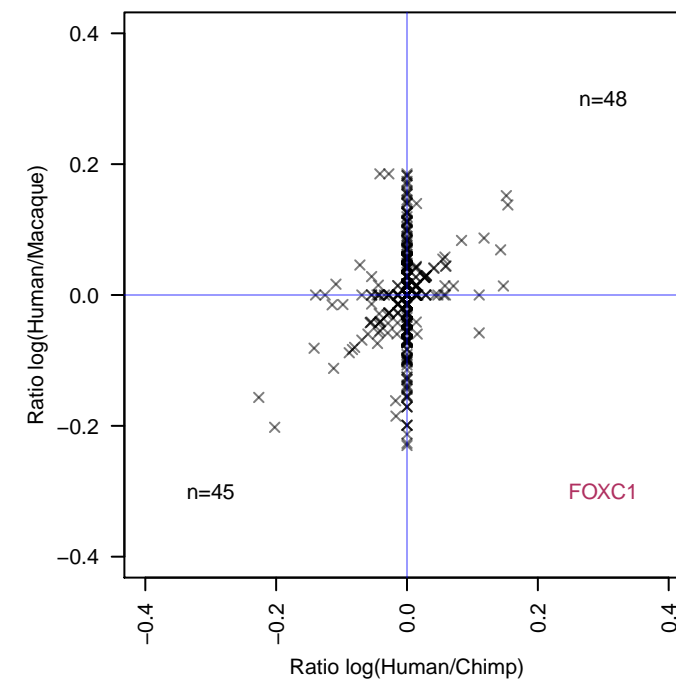

ChimpUpFibroblast.final.bed

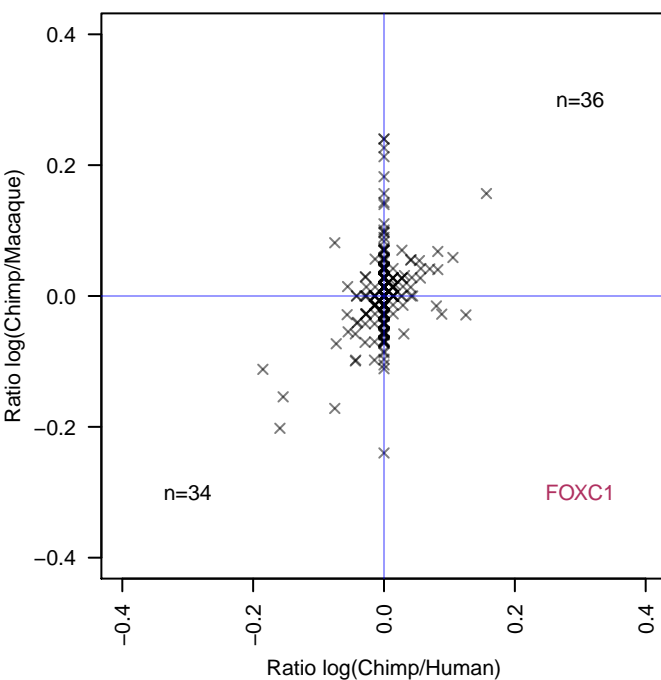

ChimpDownFibroblast.final.bed

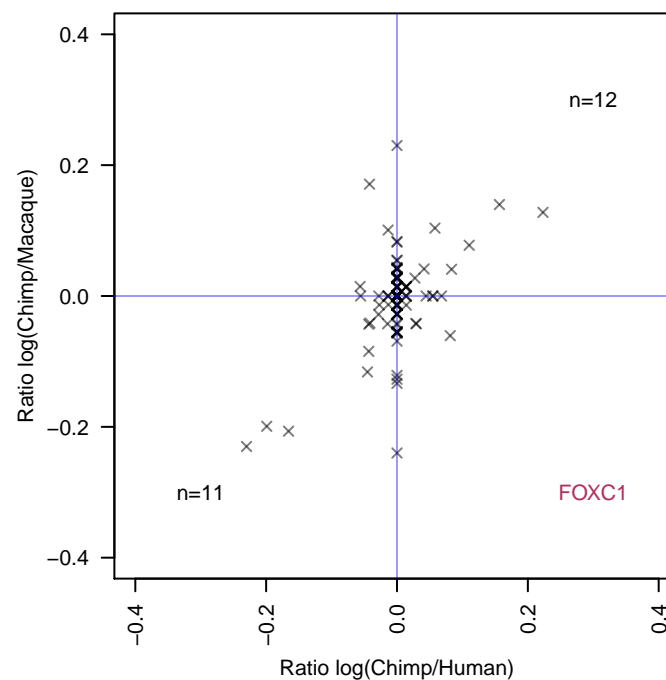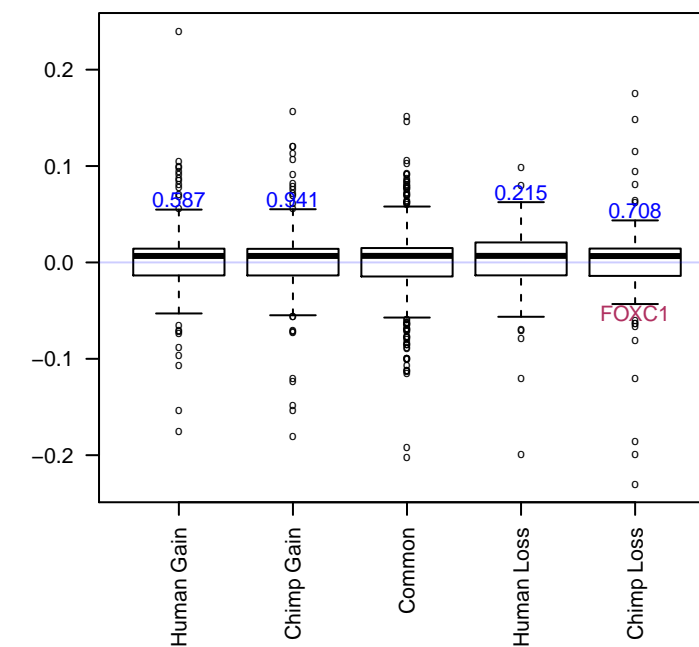

17

HumanUpFibroblast.final.bed

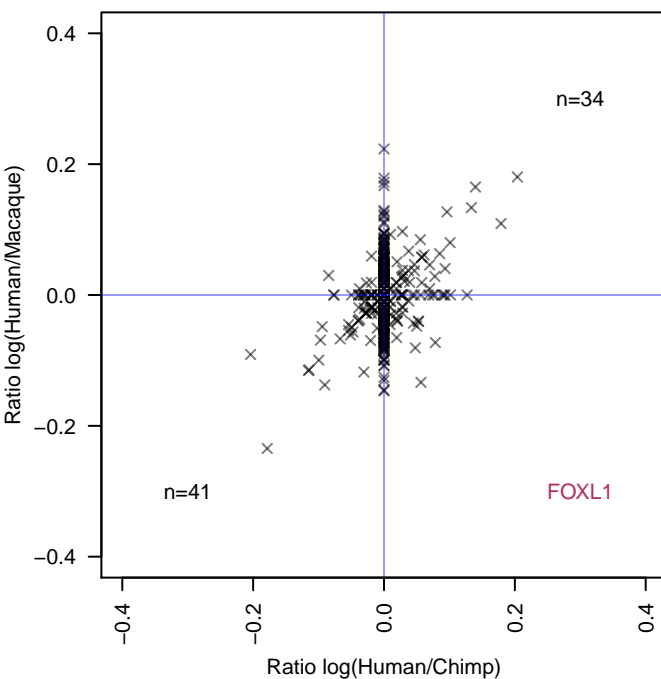

HumanDownFibroblast.final.bed

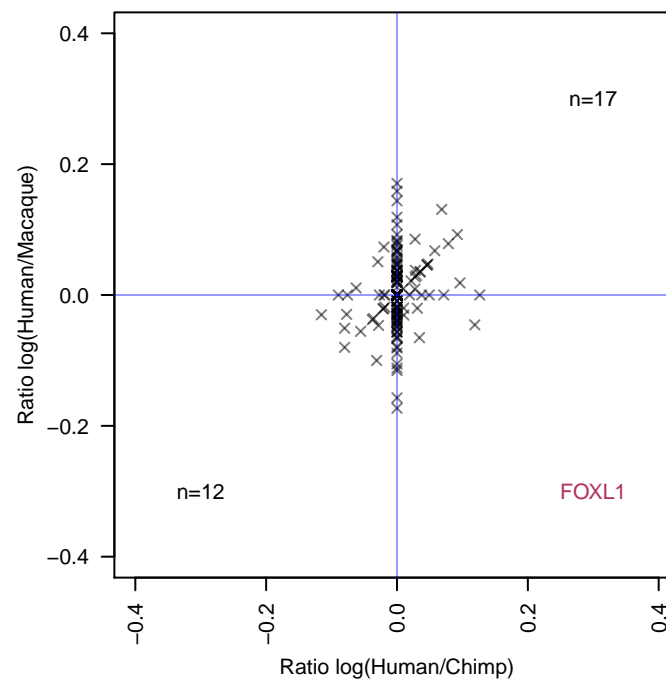

commonFibroblast.final.bed

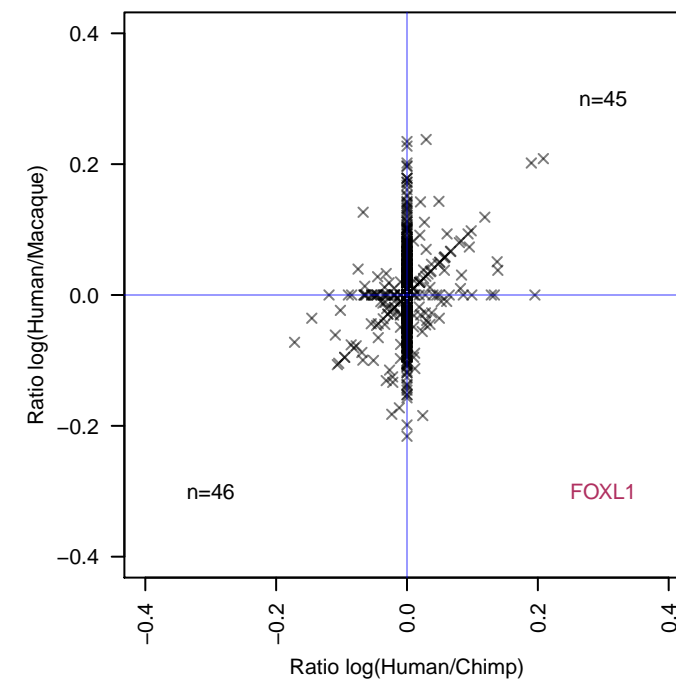

ChimpUpFibroblast.final.bed

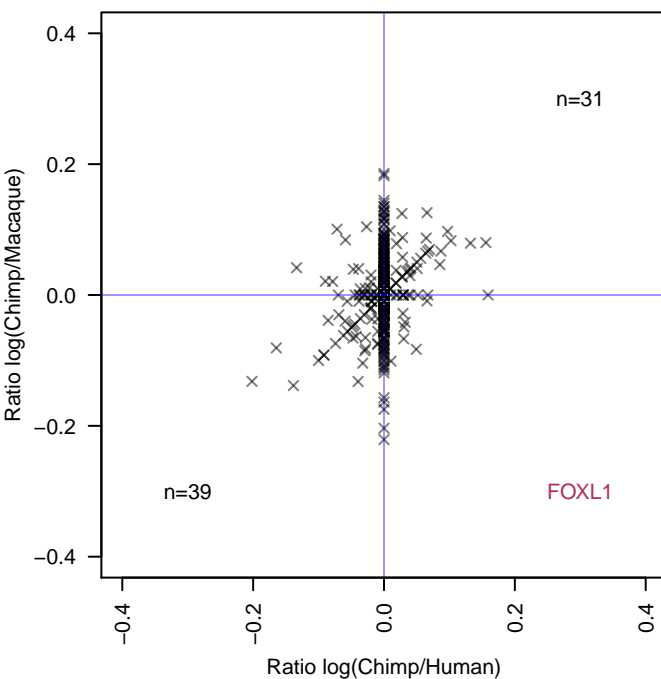

ChimpDownFibroblast.final.bed

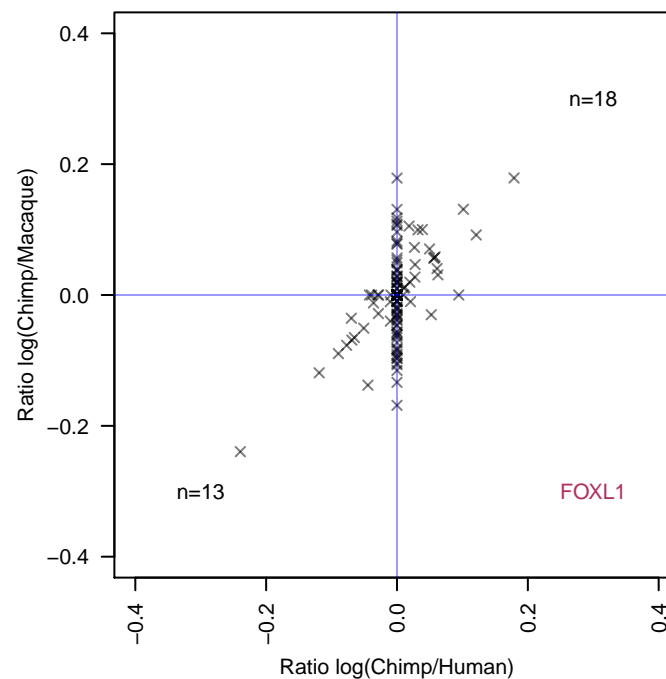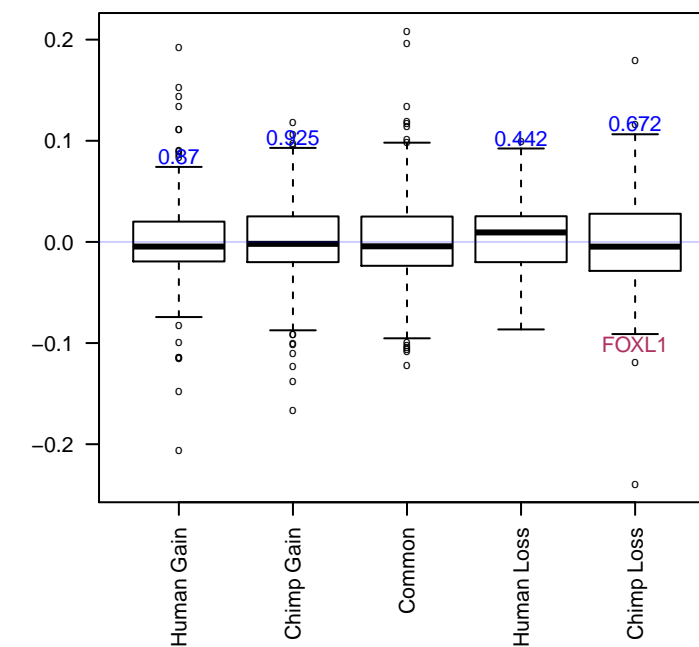

18

HumanUpFibroblast.final.bed

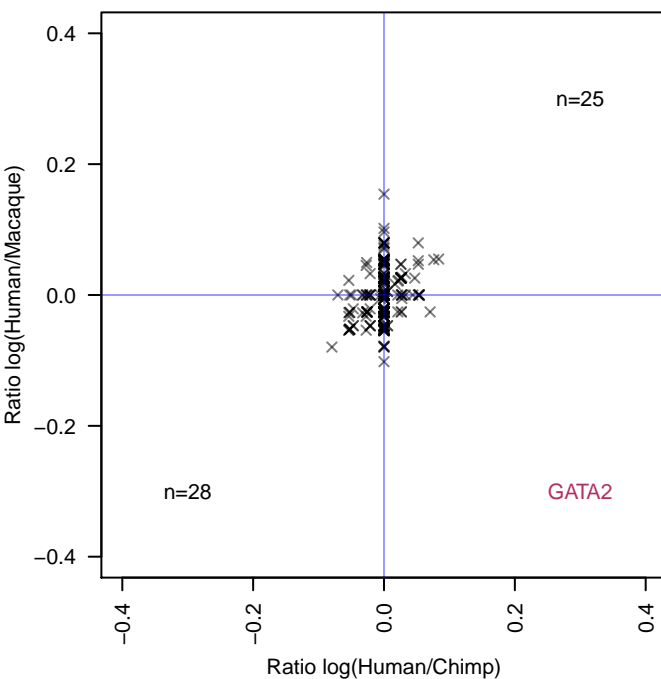

HumanDownFibroblast.final.bed

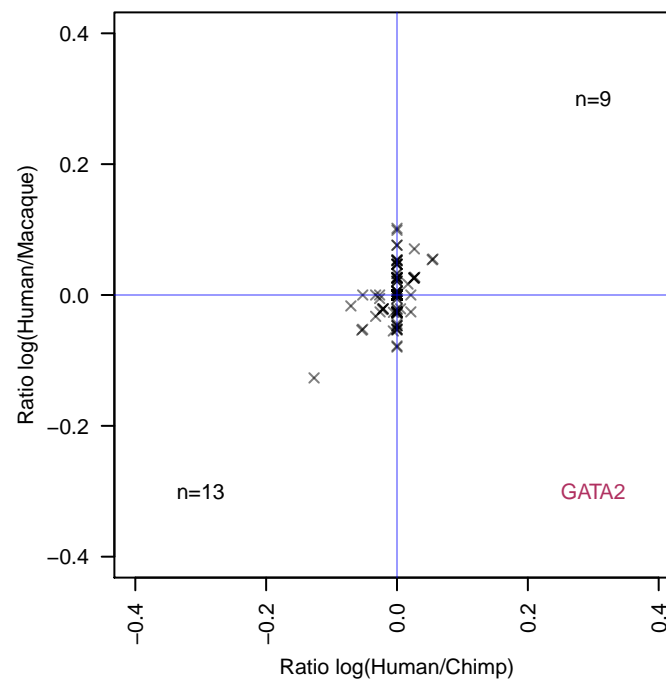

commonFibroblast.final.bed

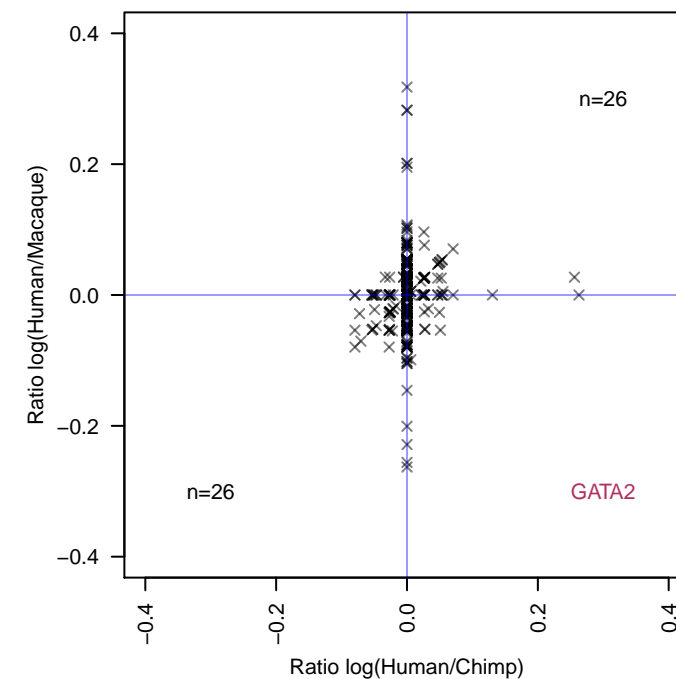

ChimpUpFibroblast.final.bed

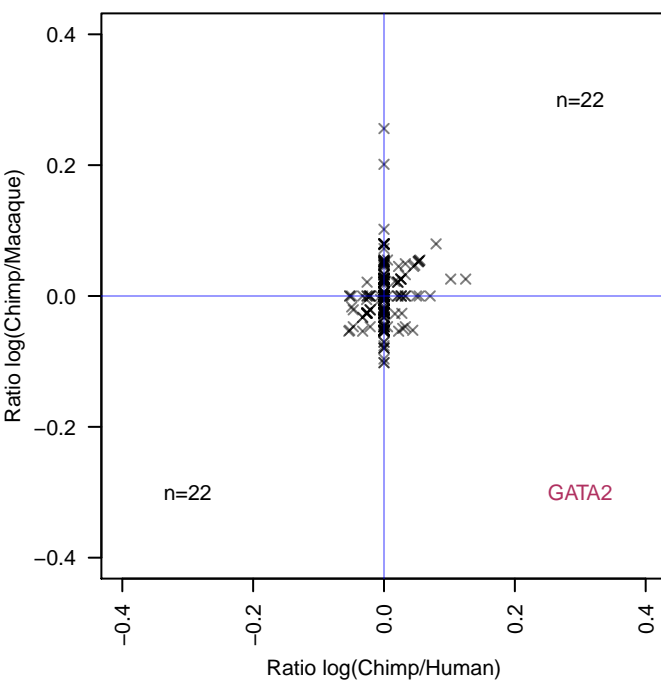

ChimpDownFibroblast.final.bed

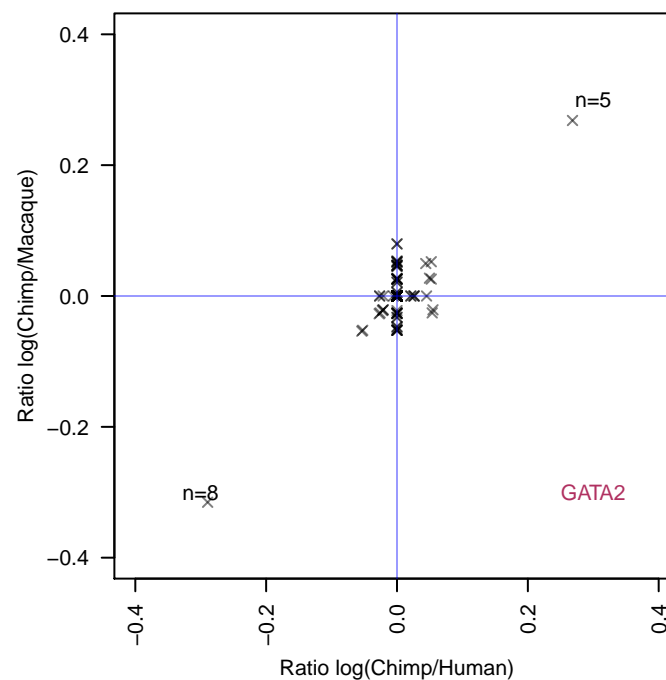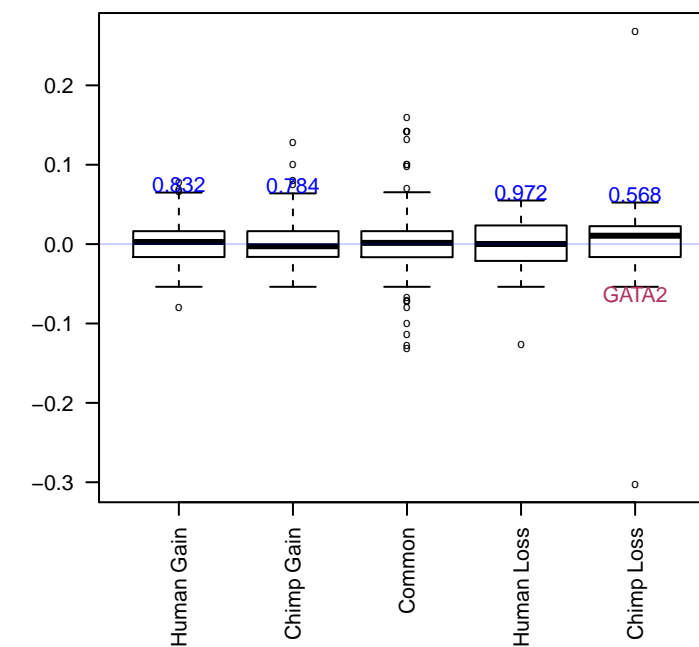

19 HumanUpFibroblast.final.bed

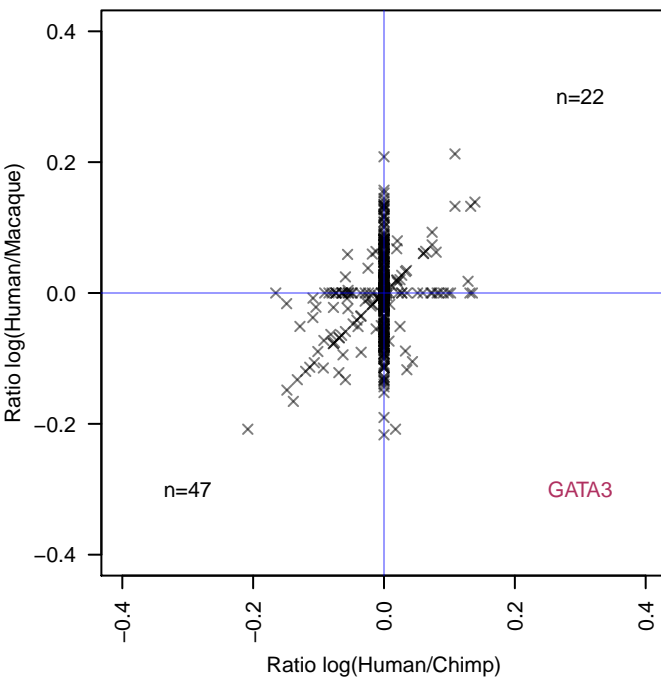

HumanDownFibroblast.final.bed

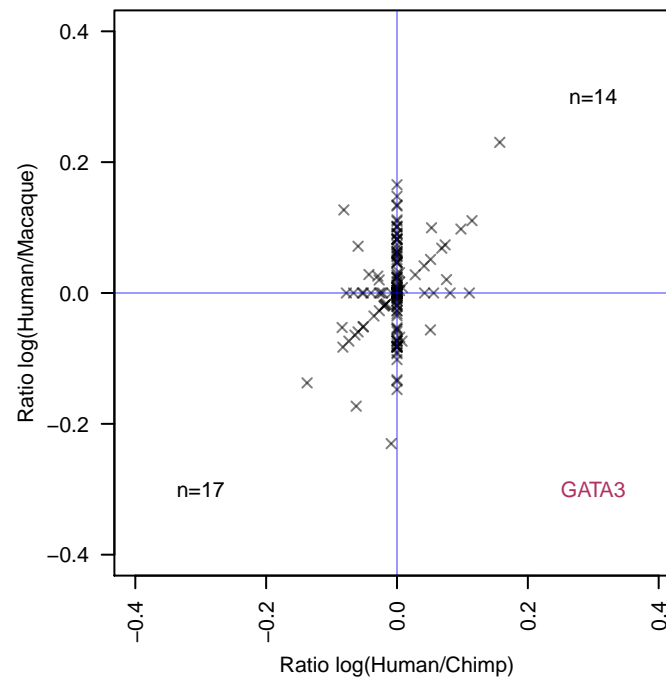

commonFibroblast.final.bed

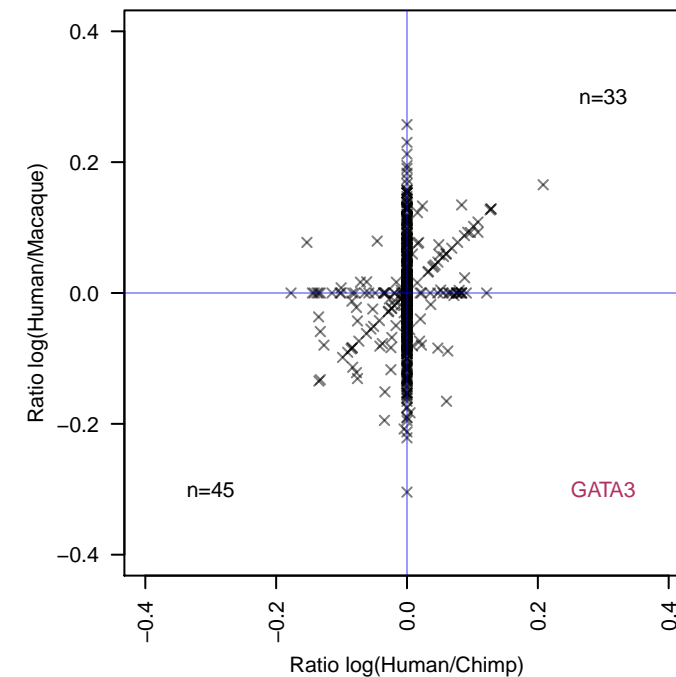

ChimpUpFibroblast.final.bed

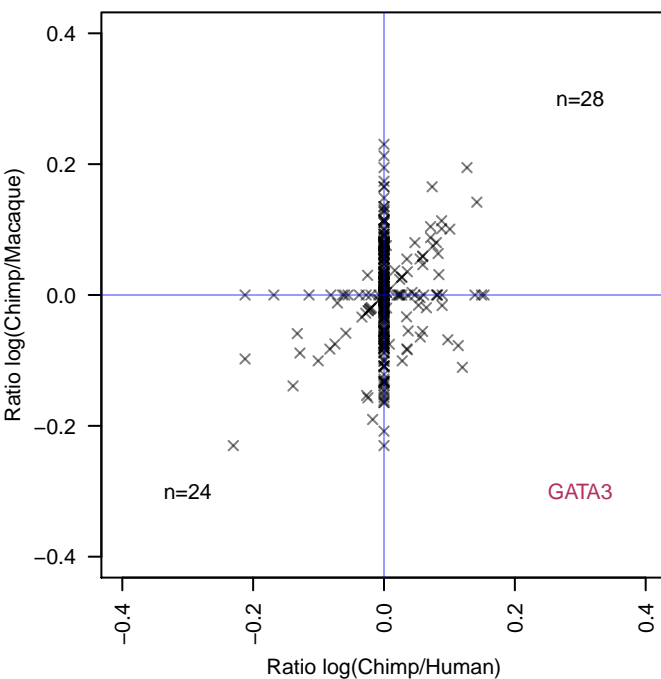

ChimpDownFibroblast.final.bed

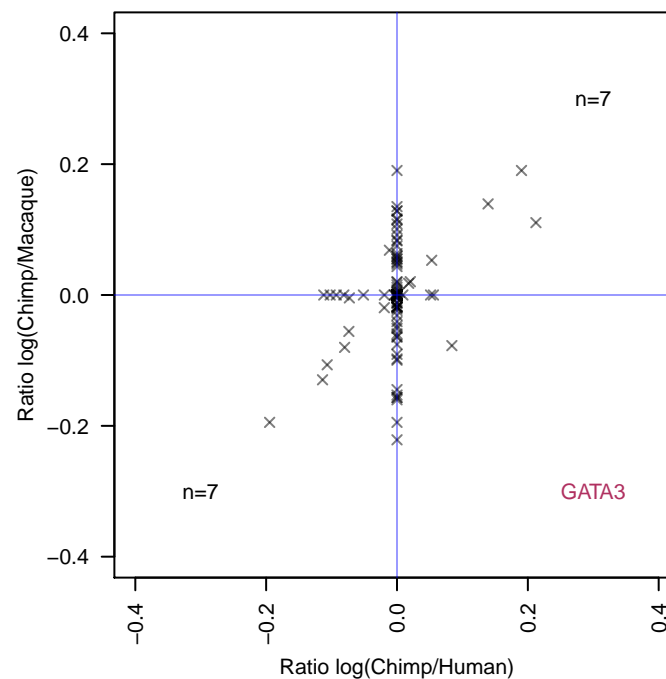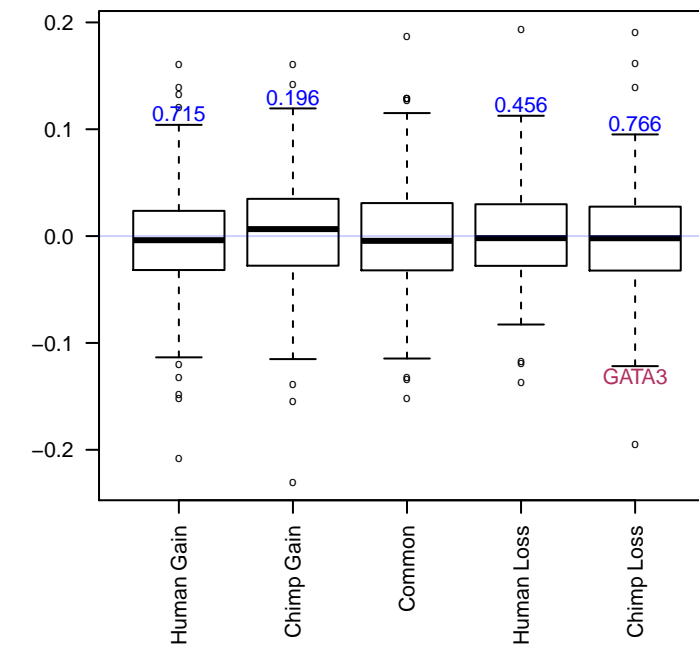

20

HumanUpFibroblast.final.bed

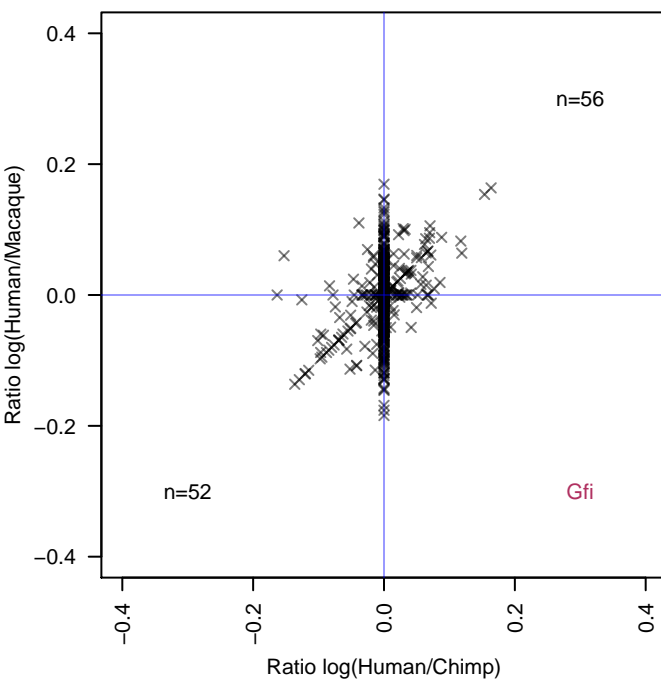

HumanDownFibroblast.final.bed

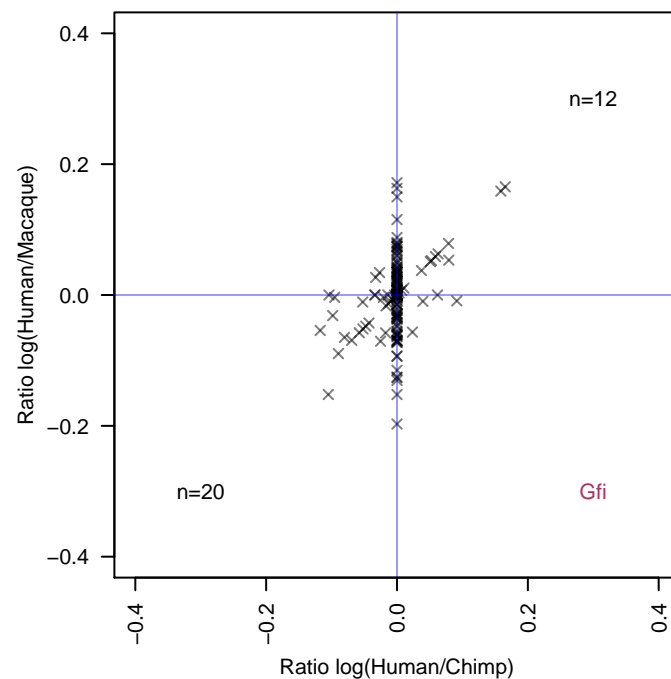

commonFibroblast.final.bed

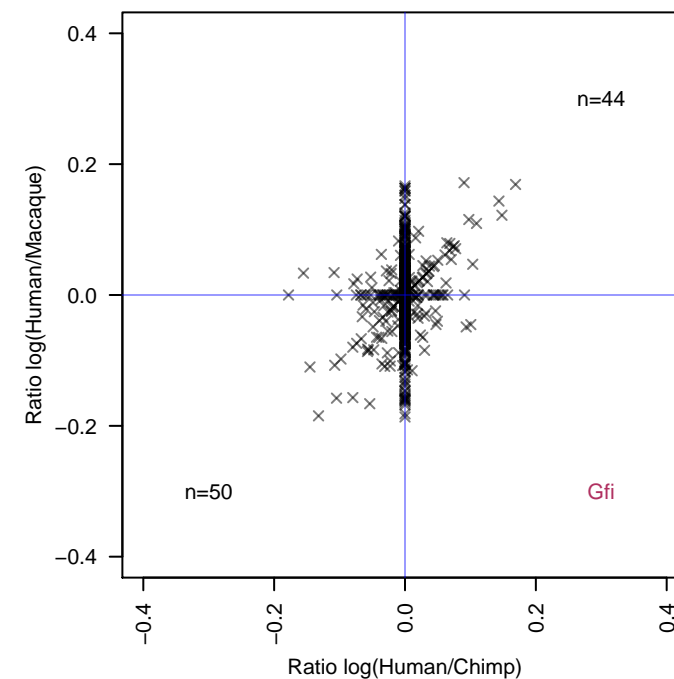

ChimpUpFibroblast.final.bed

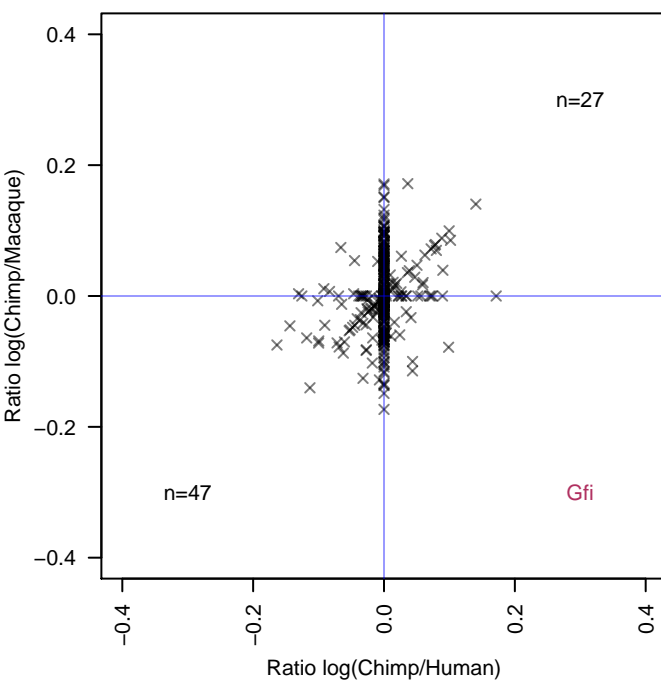

ChimpDownFibroblast.final.bed

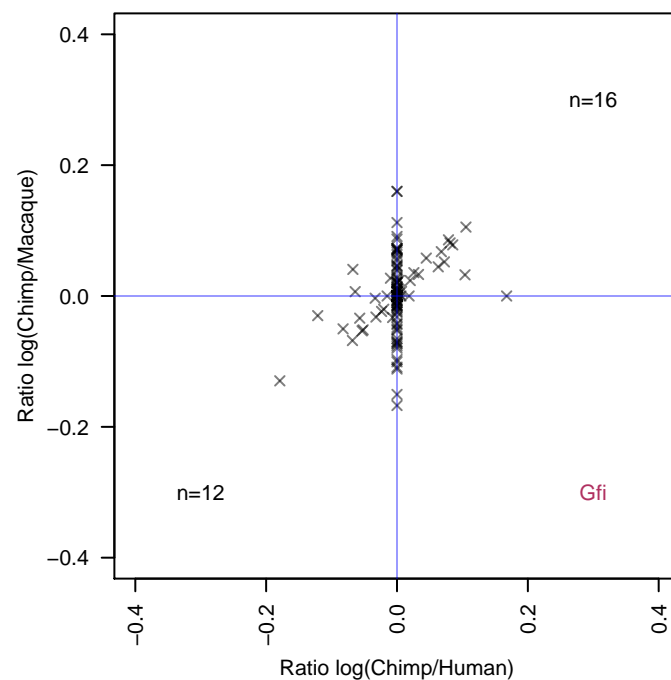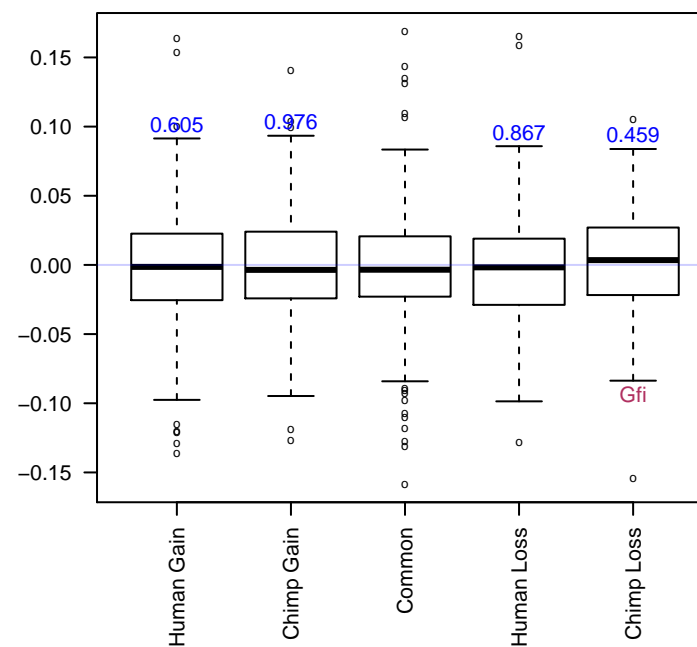

21

HumanUpFibroblast.final.bed

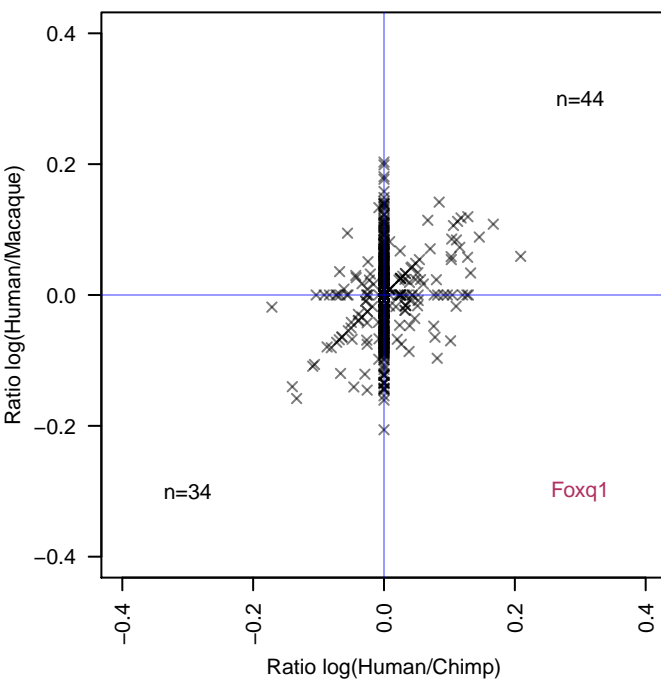

HumanDownFibroblast.final.bed

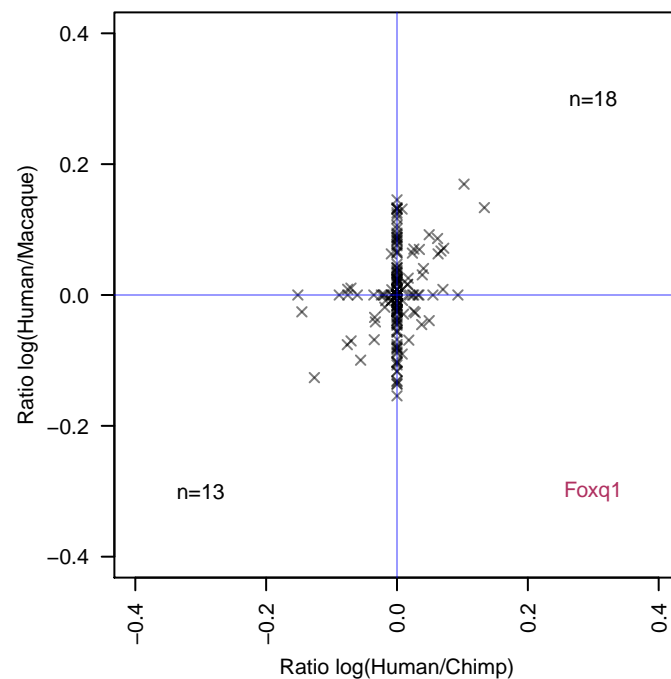

commonFibroblast.final.bed

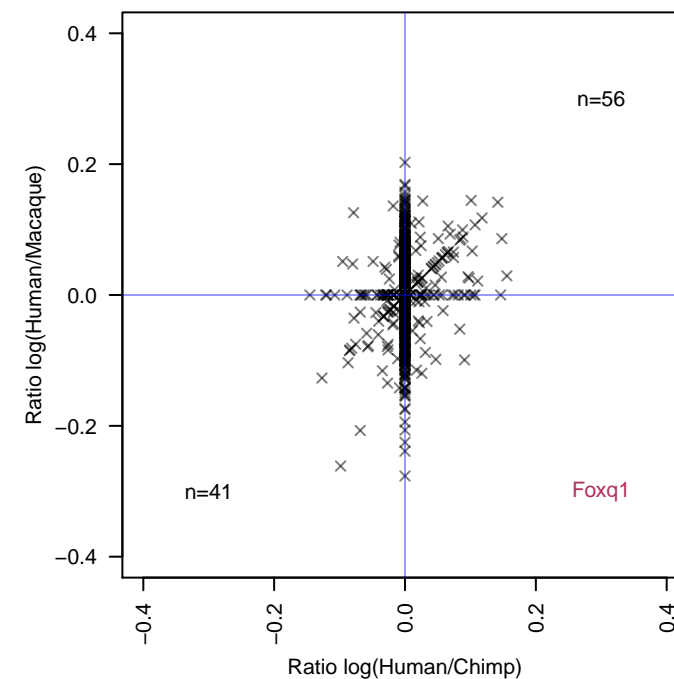

ChimpUpFibroblast.final.bed

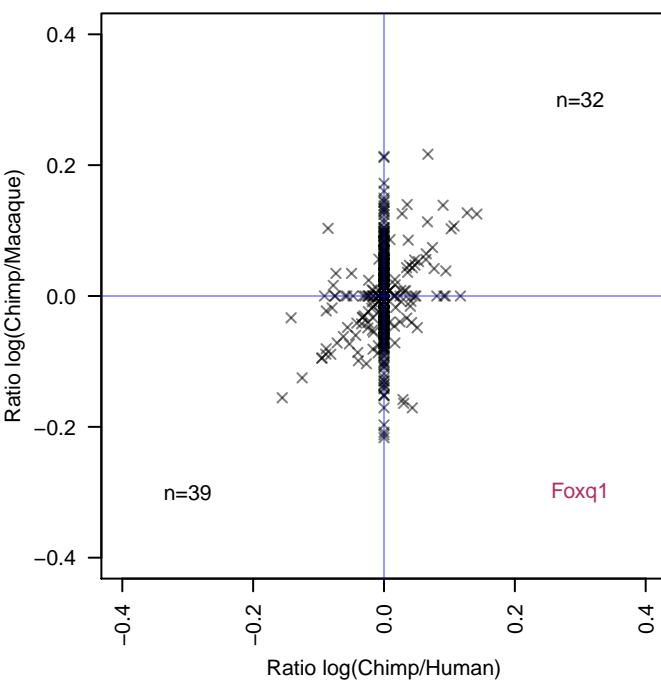

ChimpDownFibroblast.final.bed

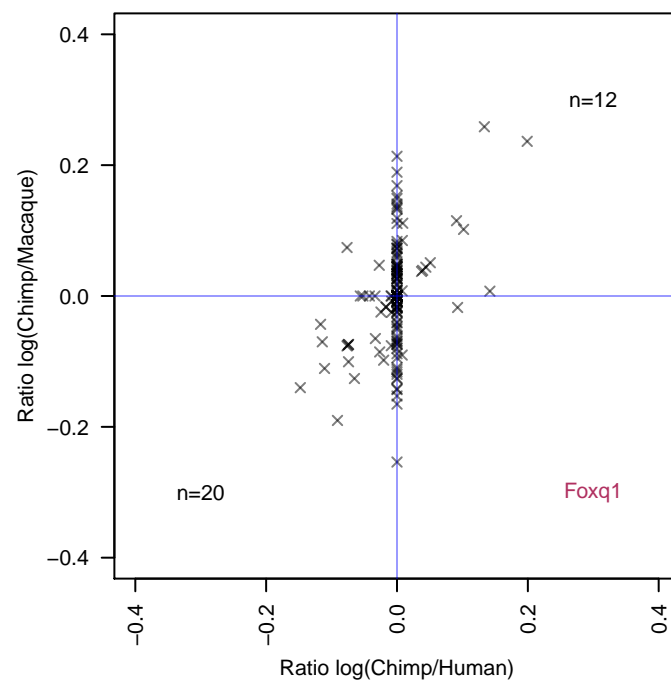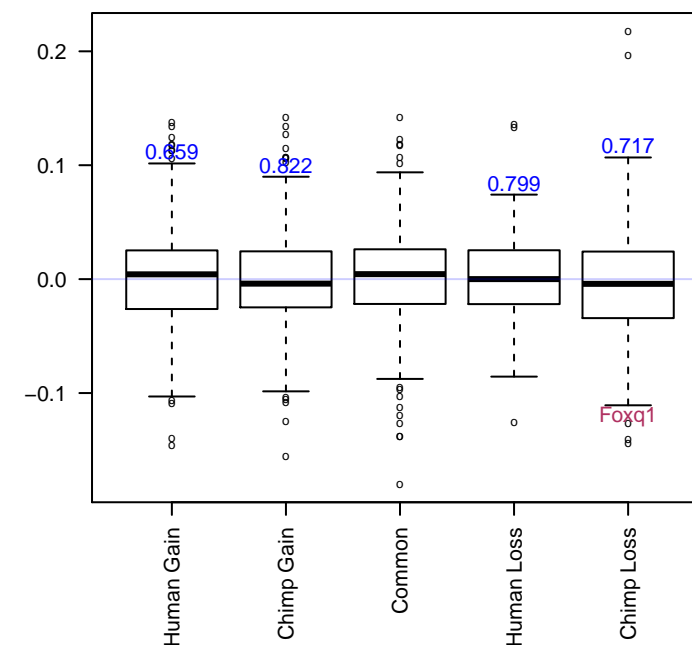

22

HumanUpFibroblast.final.bed

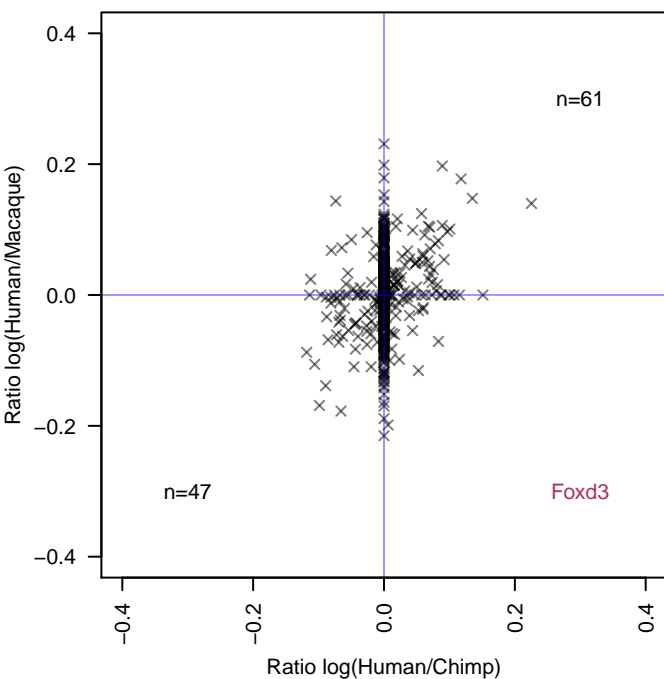

HumanDownFibroblast.final.bed

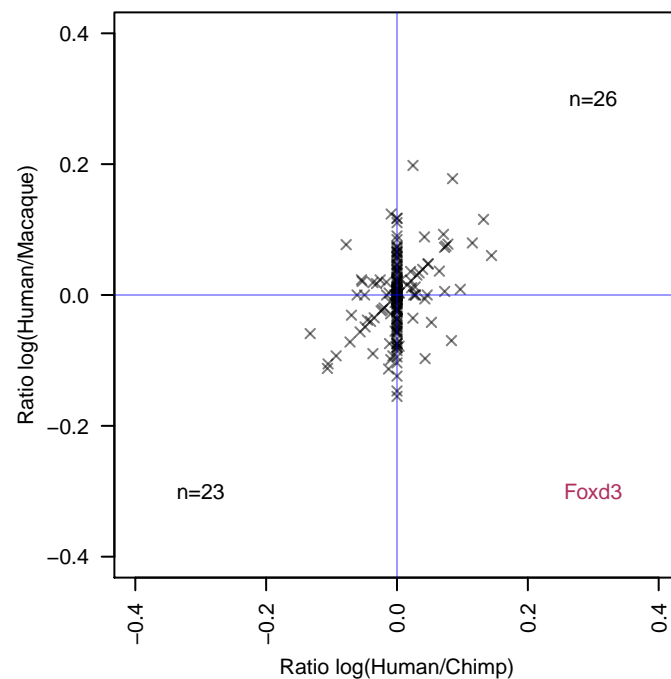

commonFibroblast.final.bed

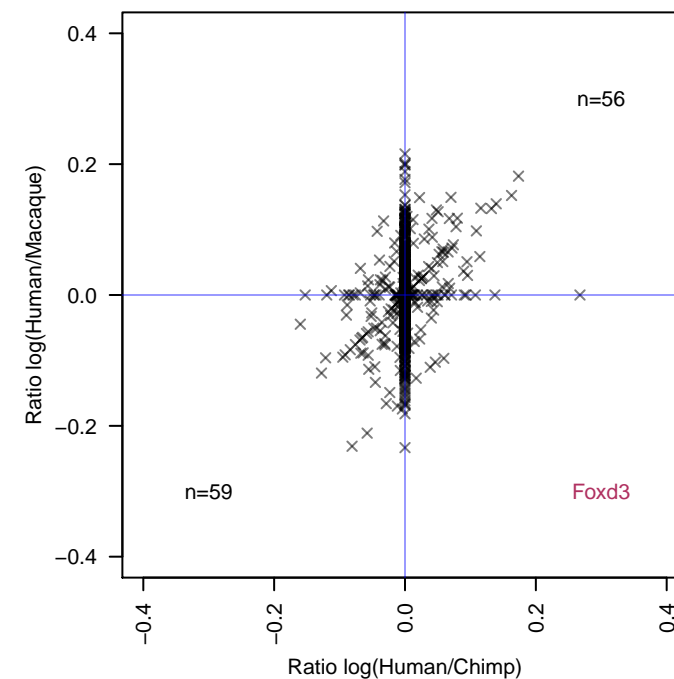

ChimpUpFibroblast.final.bed

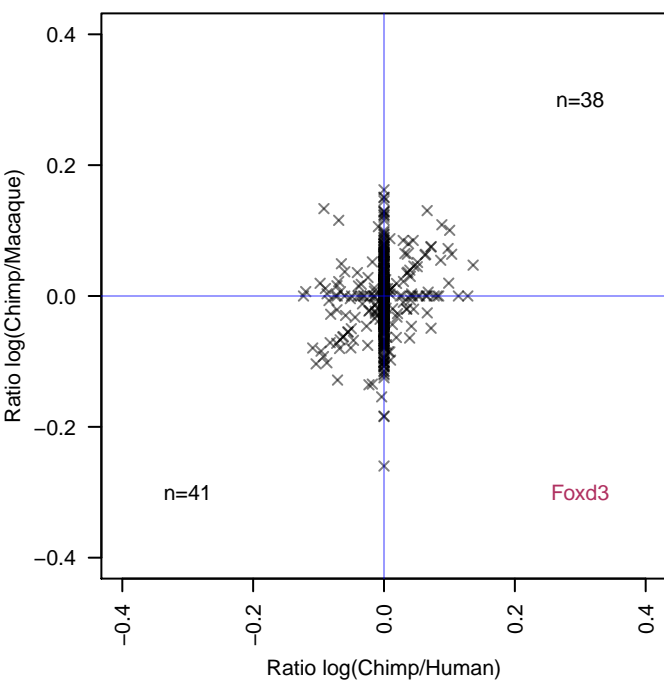

ChimpDownFibroblast.final.bed

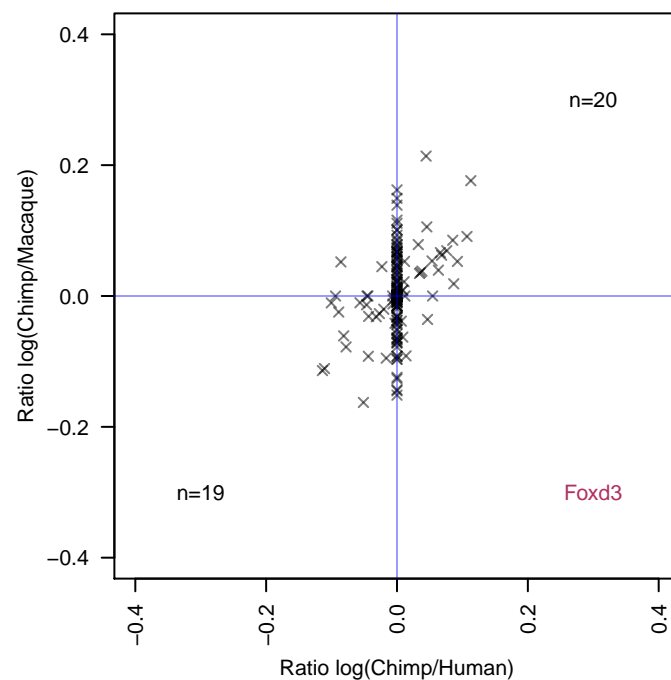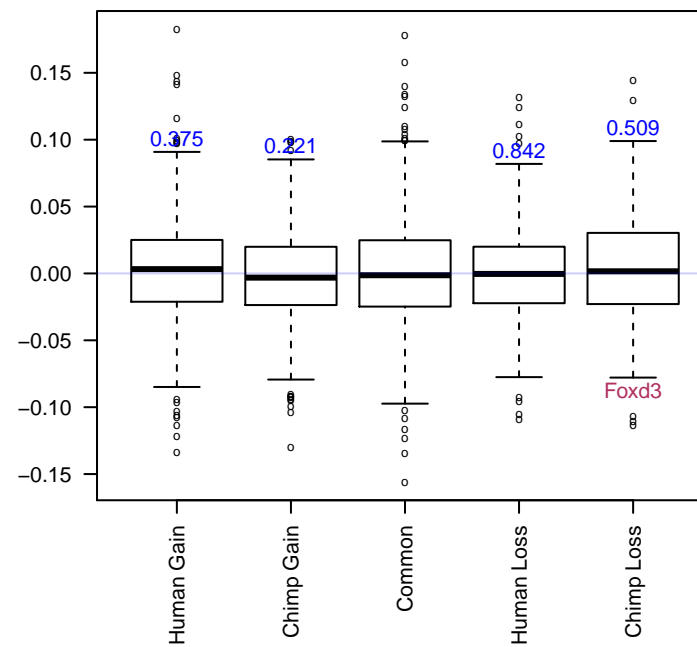

23

HumanUpFibroblast.final.bed

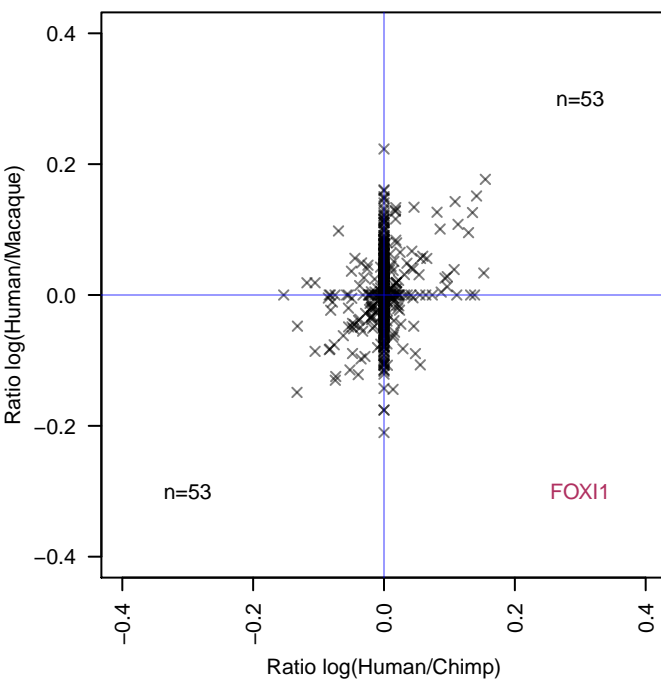

HumanDownFibroblast.final.bed

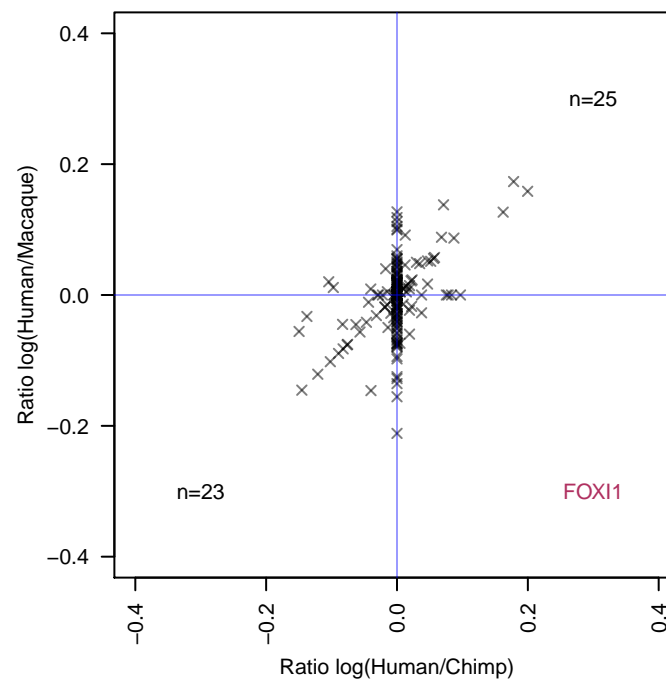

commonFibroblast.final.bed

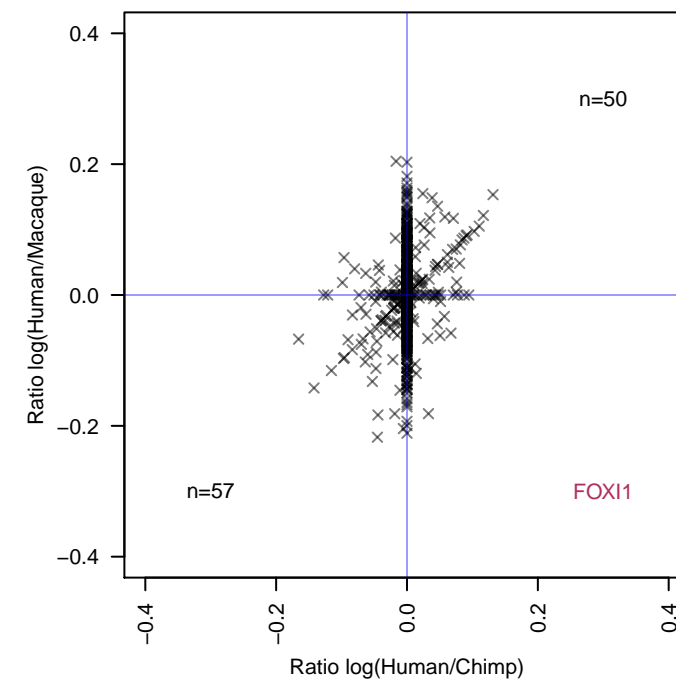

ChimpUpFibroblast.final.bed

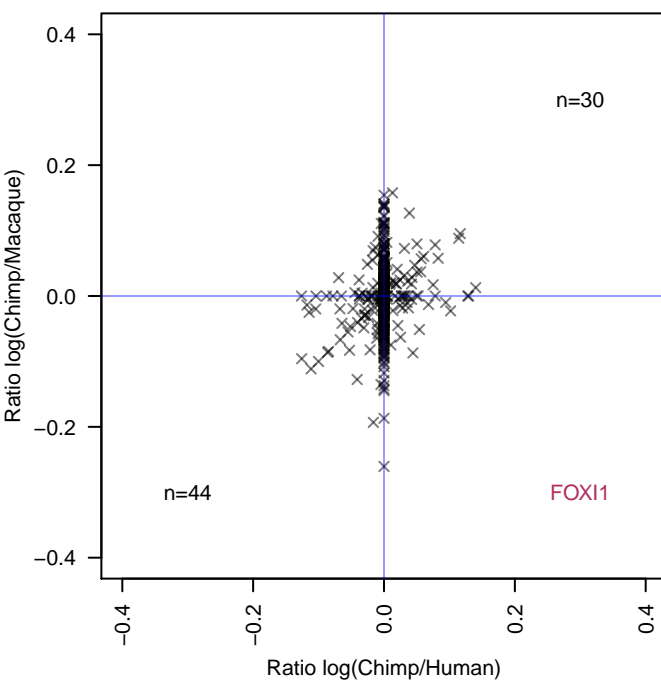

ChimpDownFibroblast.final.bed

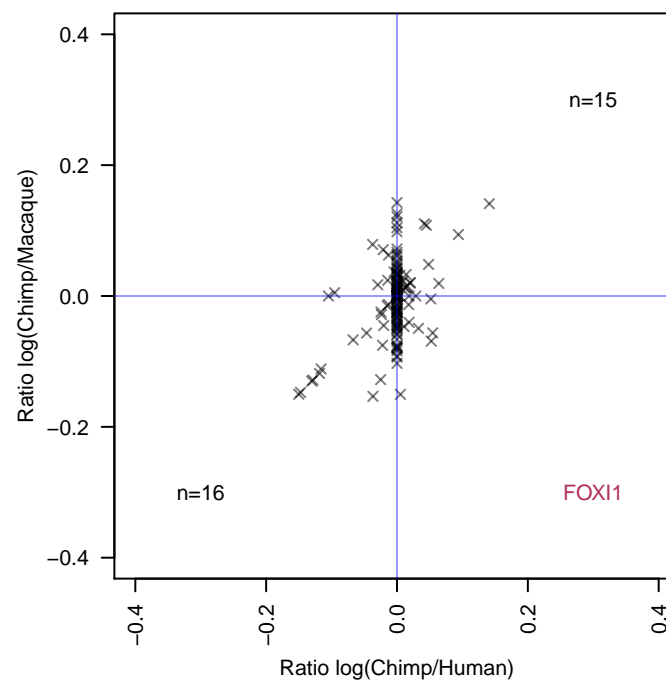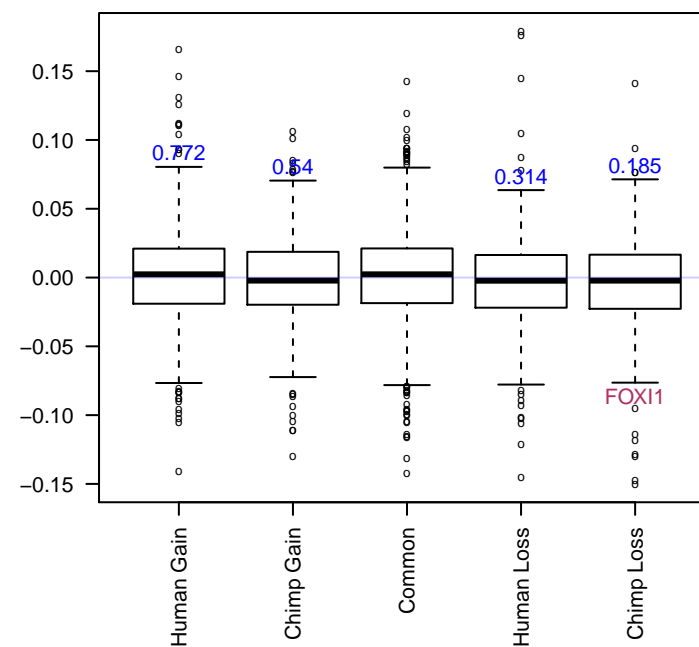

24

HumanUpFibroblast.final.bed

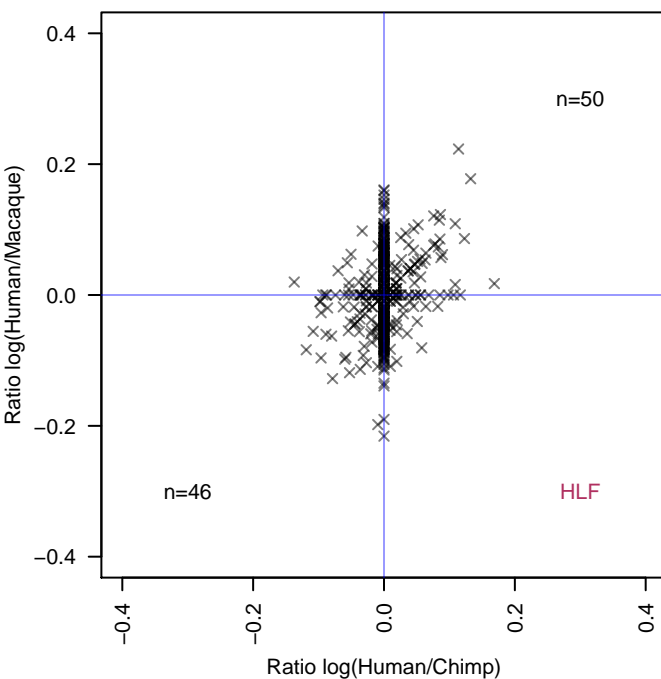

HumanDownFibroblast.final.bed

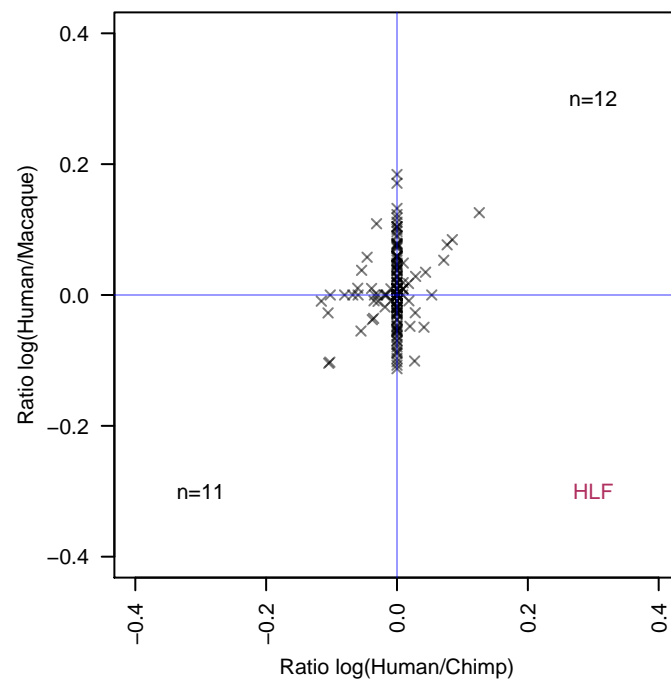

commonFibroblast.final.bed

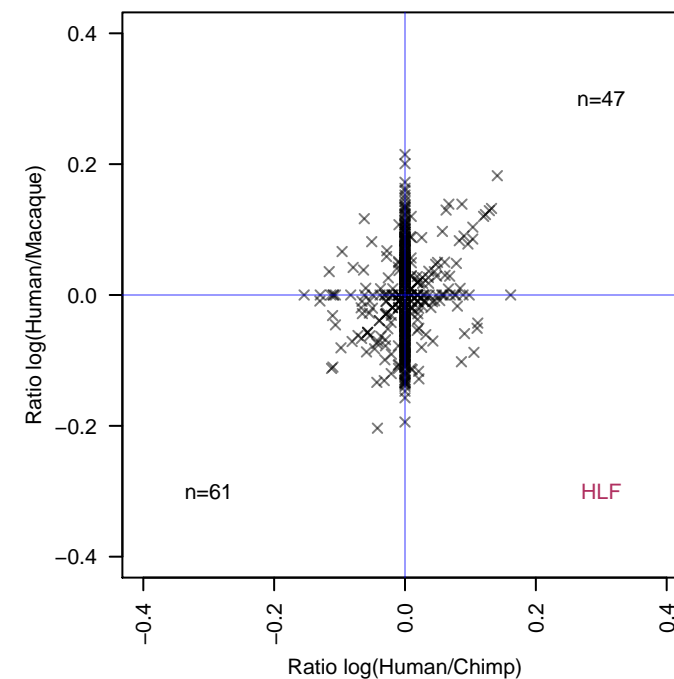

ChimpUpFibroblast.final.bed

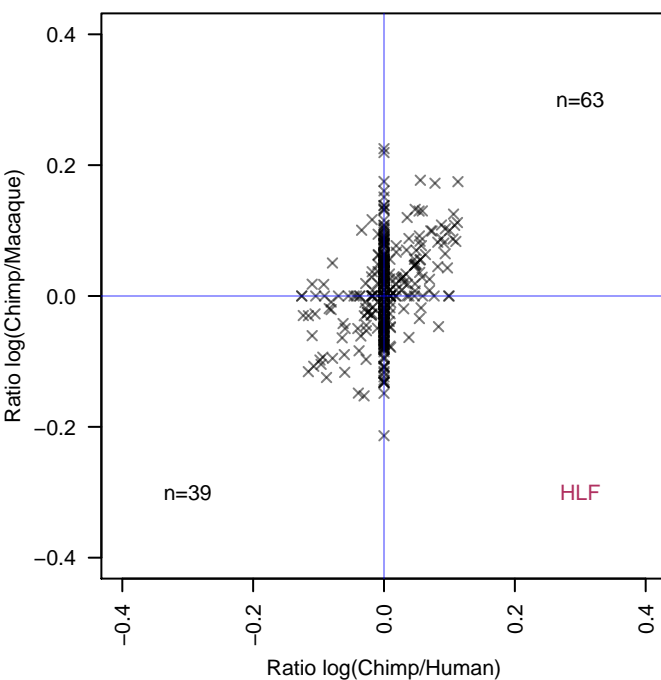

ChimpDownFibroblast.final.bed

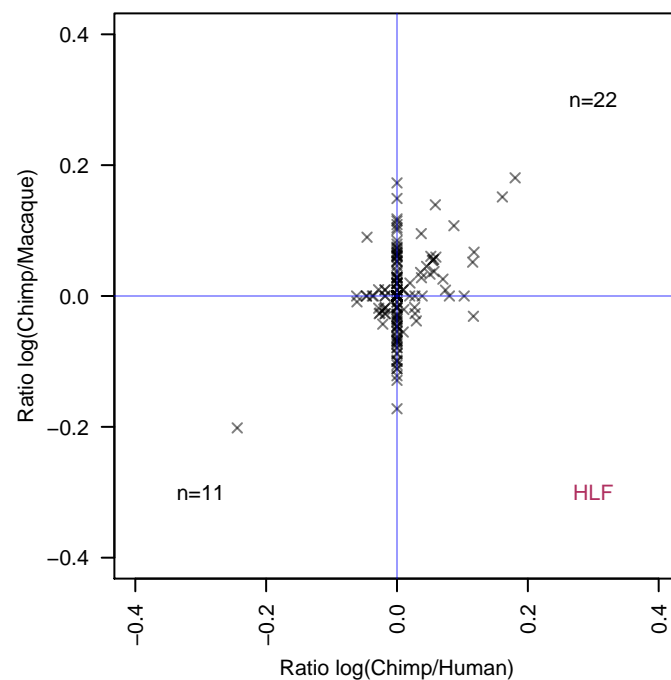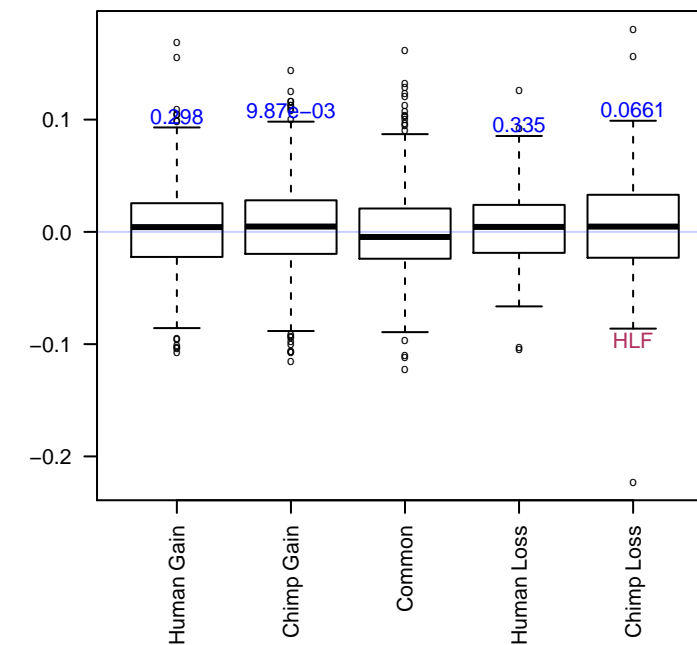

25 HumanUpFibroblast.final.bed

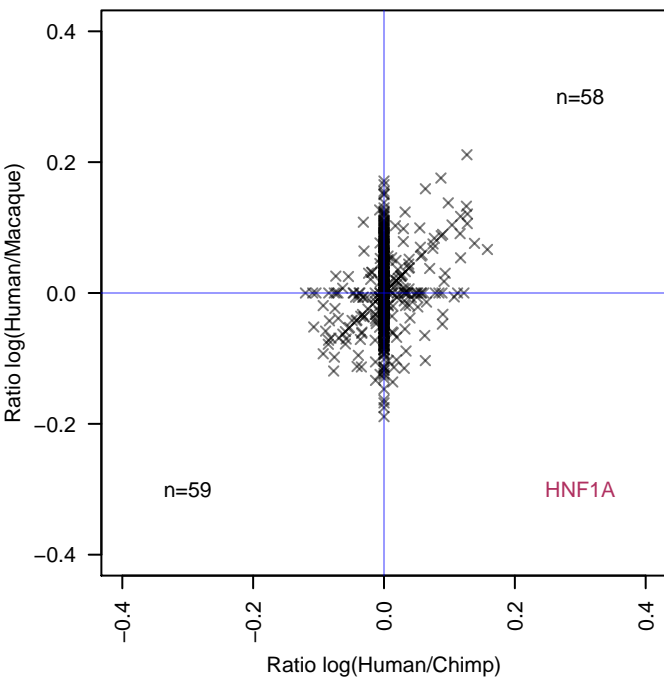

HumanDownFibroblast.final.bed

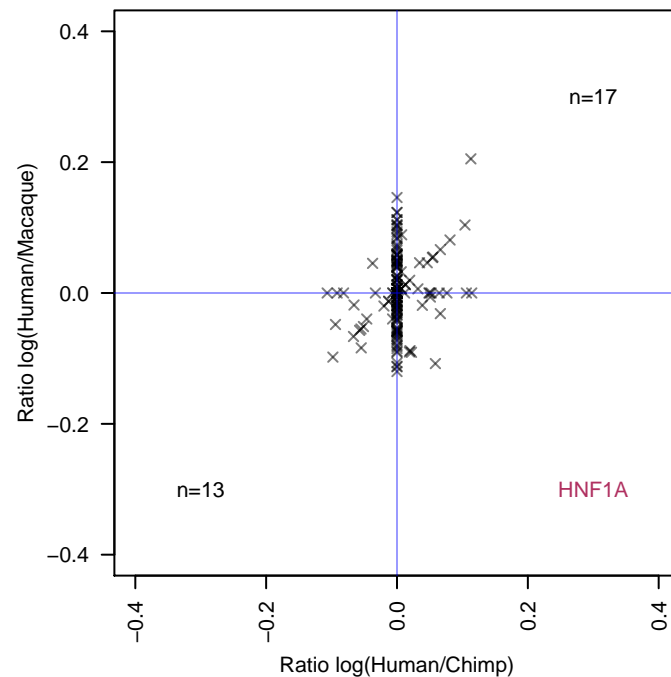

commonFibroblast.final.bed

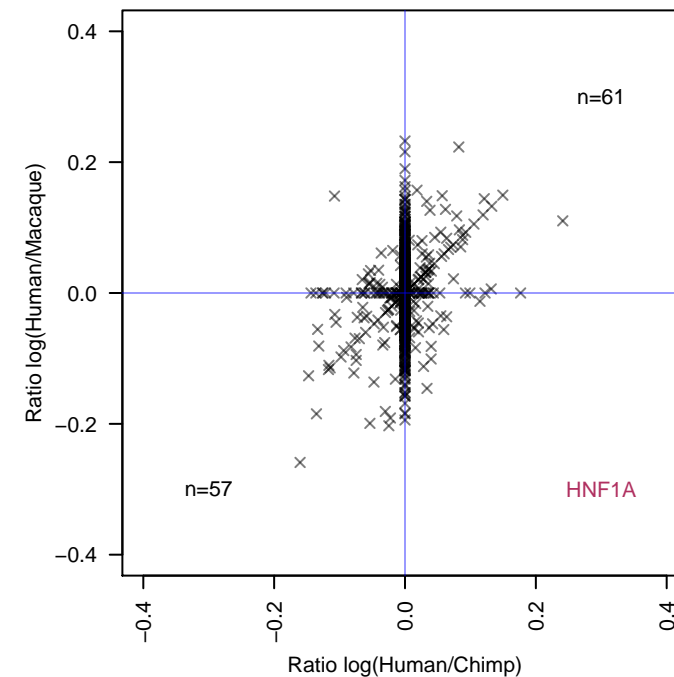

ChimpUpFibroblast.final.bed

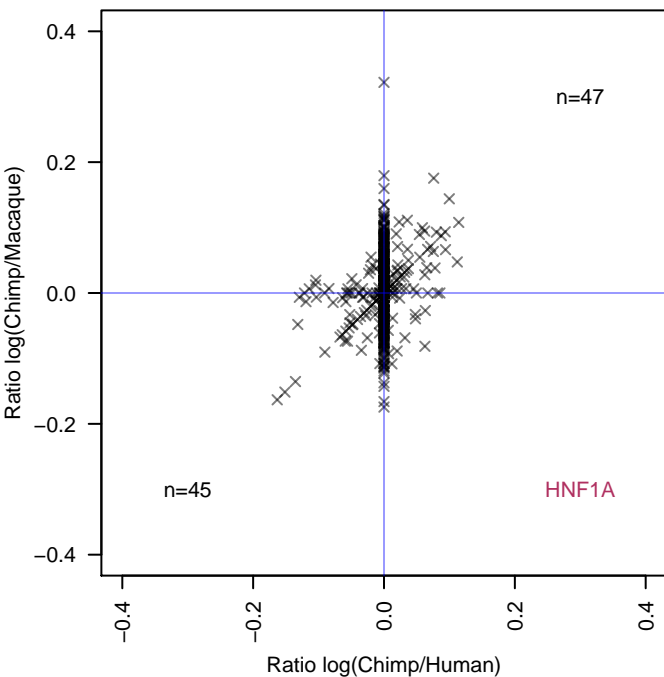

ChimpDownFibroblast.final.bed

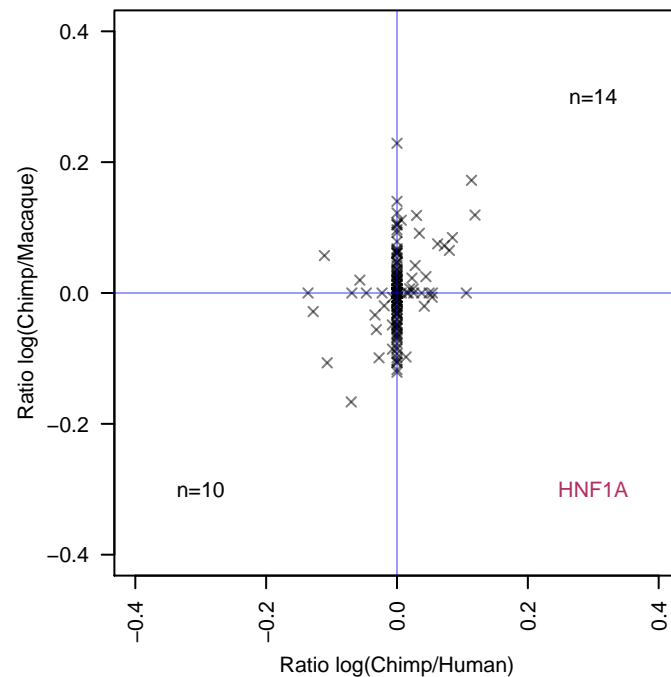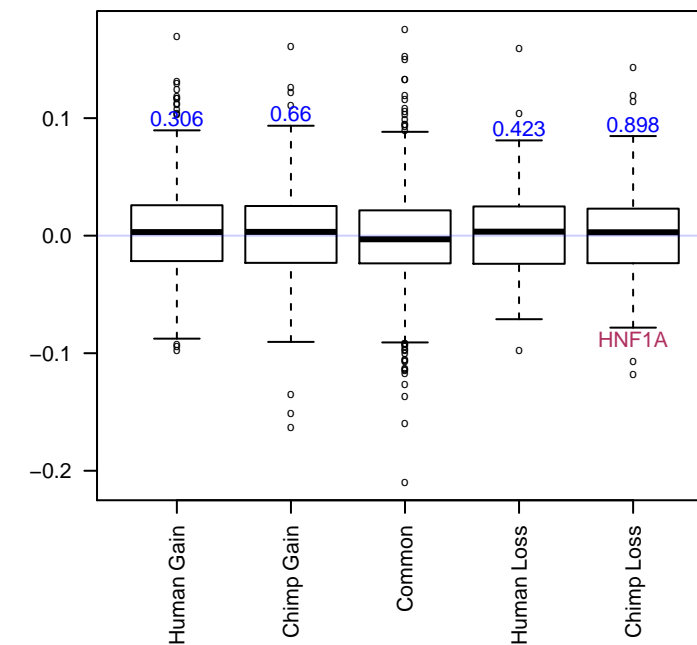

26

HumanUpFibroblast.final.bed

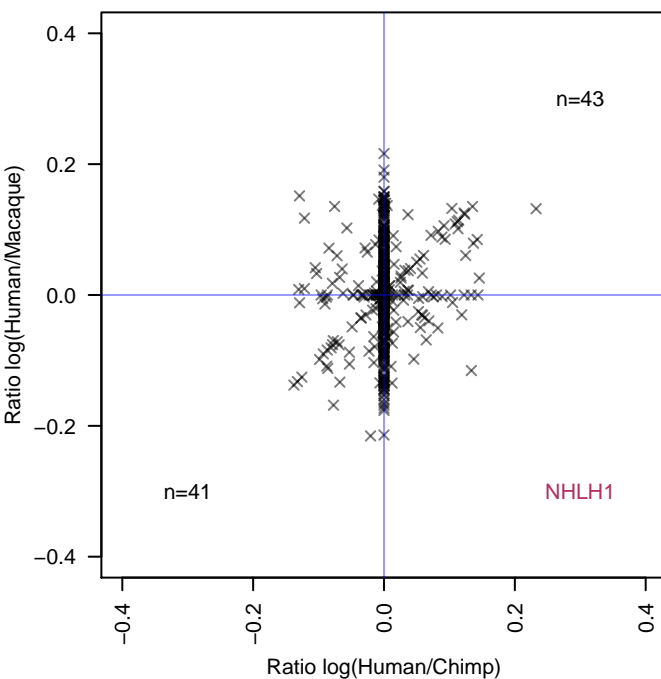

HumanDownFibroblast.final.bed

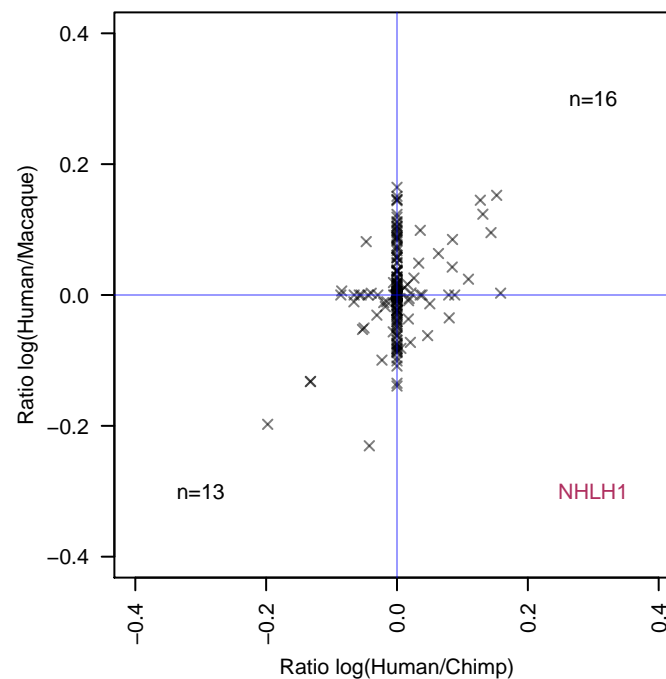

commonFibroblast.final.bed

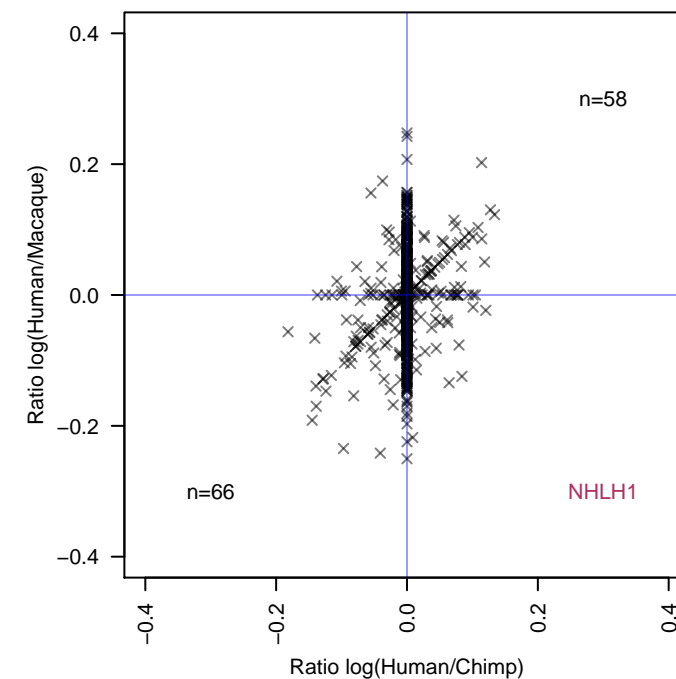

ChimpUpFibroblast.final.bed

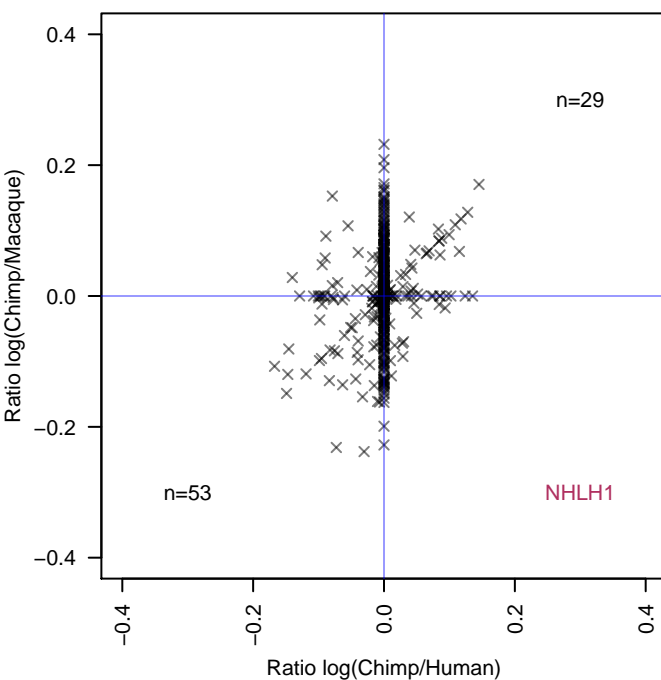

ChimpDownFibroblast.final.bed

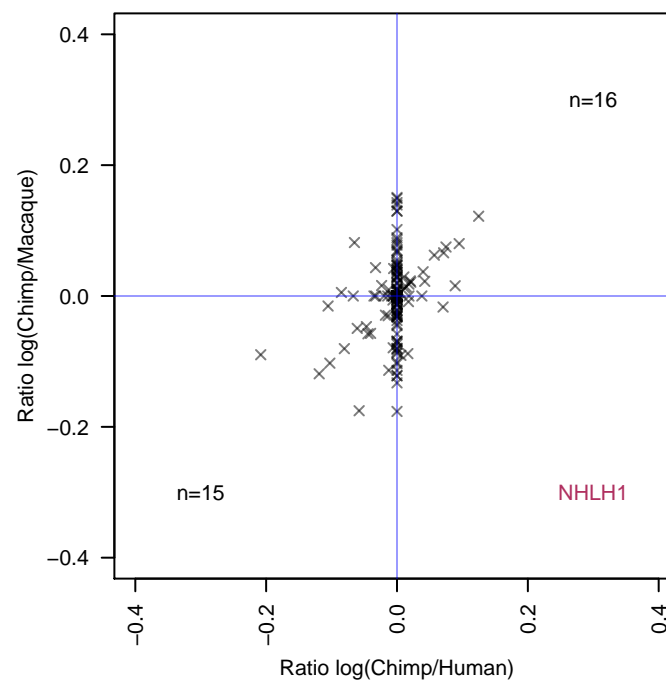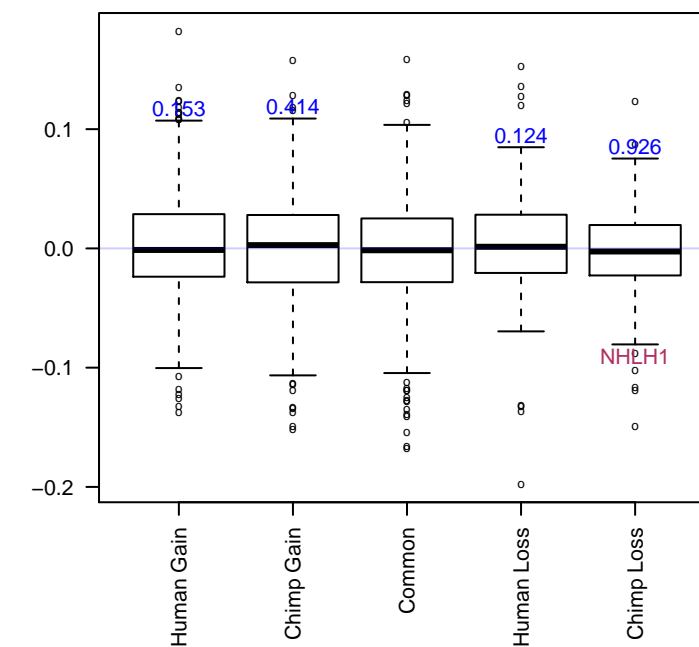

27

HumanUpFibroblast.final.bed

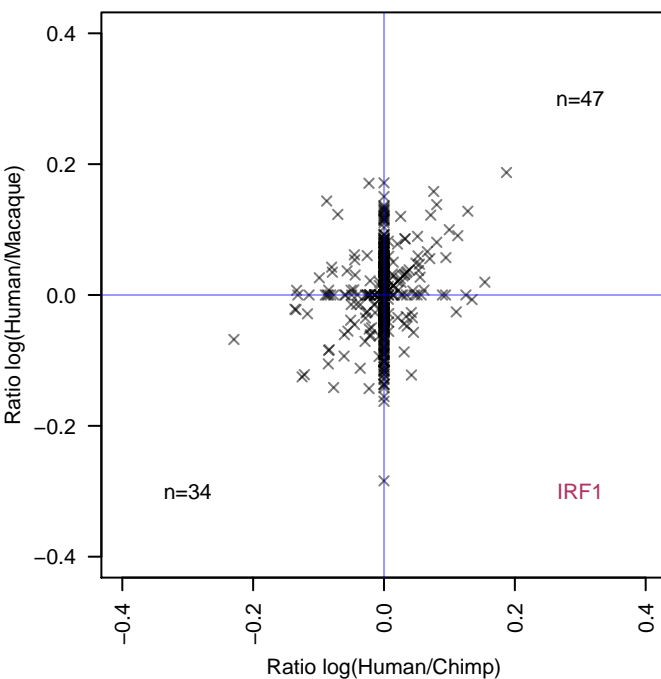

HumanDownFibroblast.final.bed

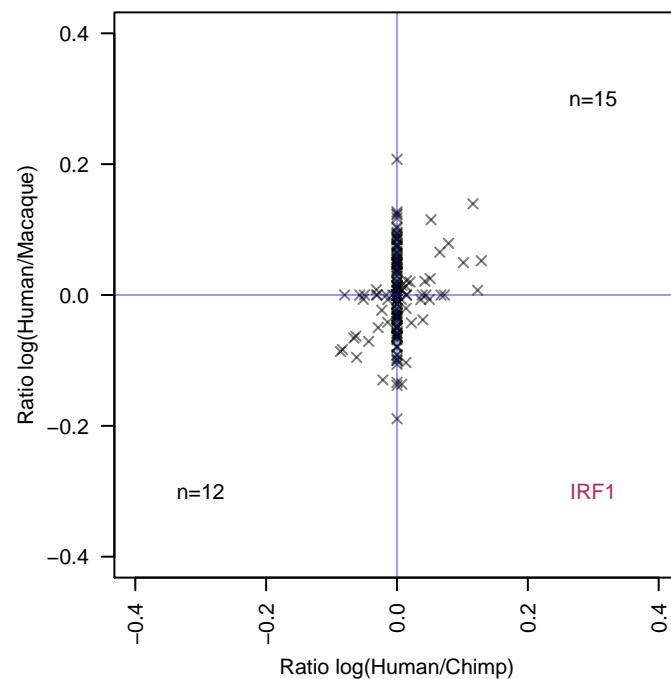

commonFibroblast.final.bed

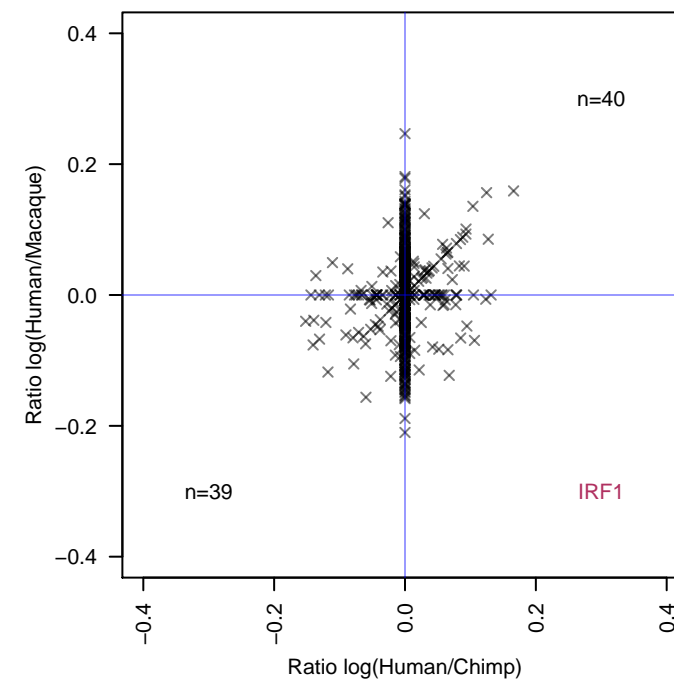

ChimpUpFibroblast.final.bed

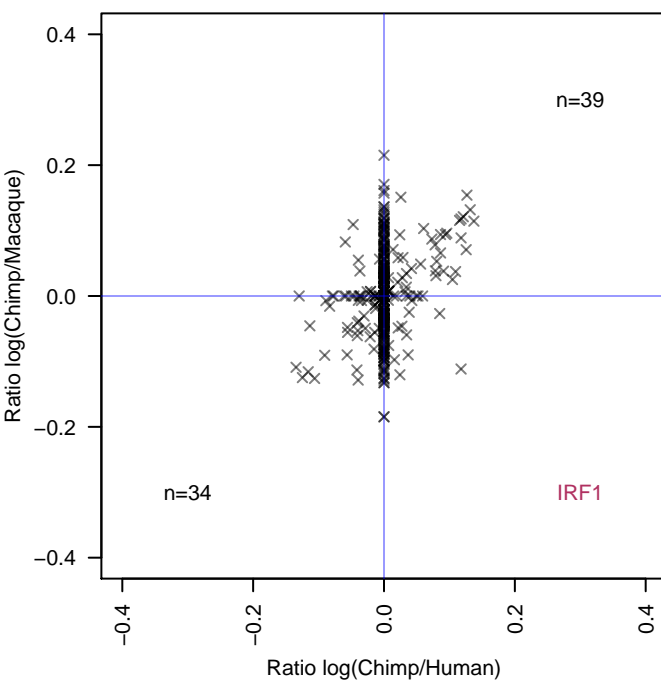

ChimpDownFibroblast.final.bed

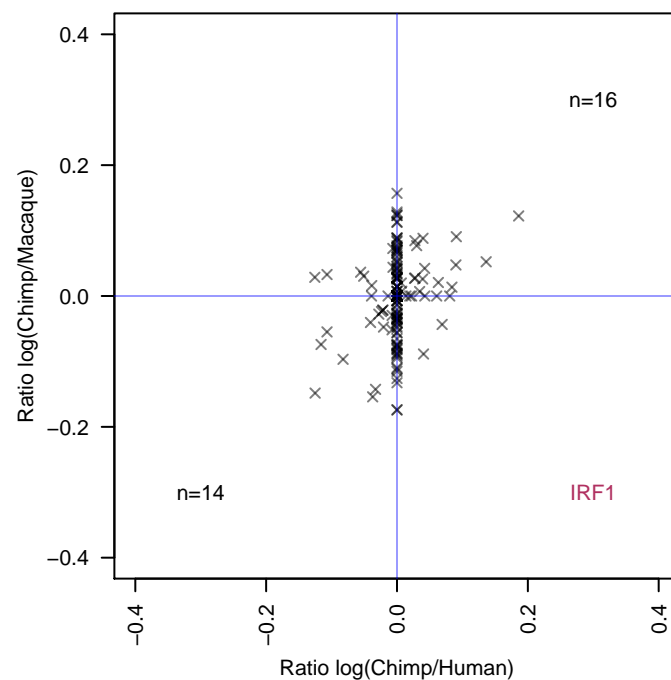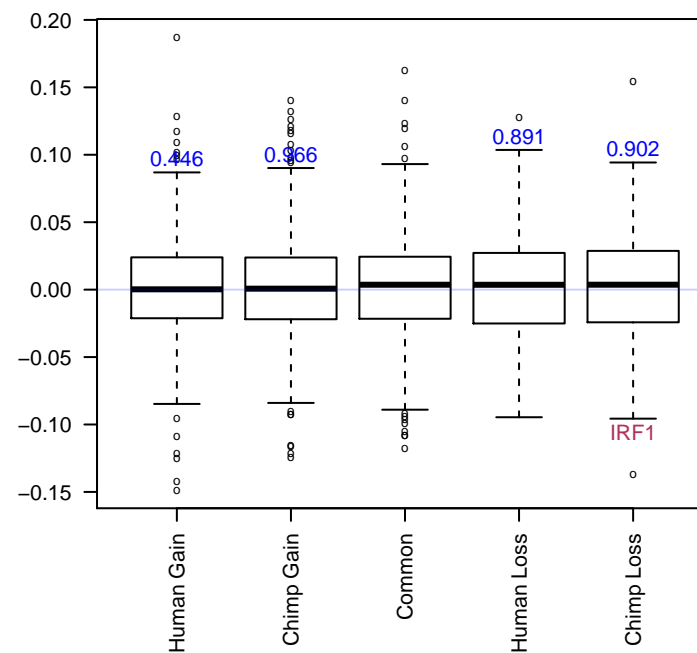

28

HumanUpFibroblast.final.bed

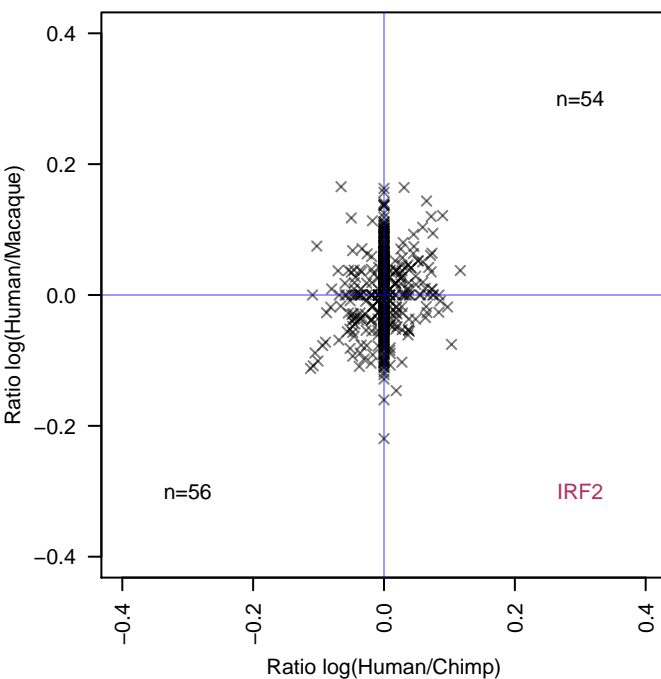

HumanDownFibroblast.final.bed

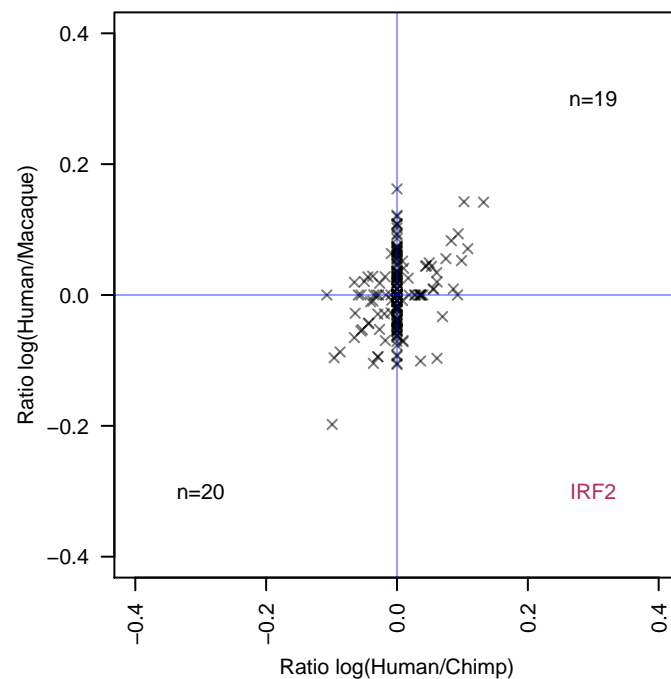

commonFibroblast.final.bed

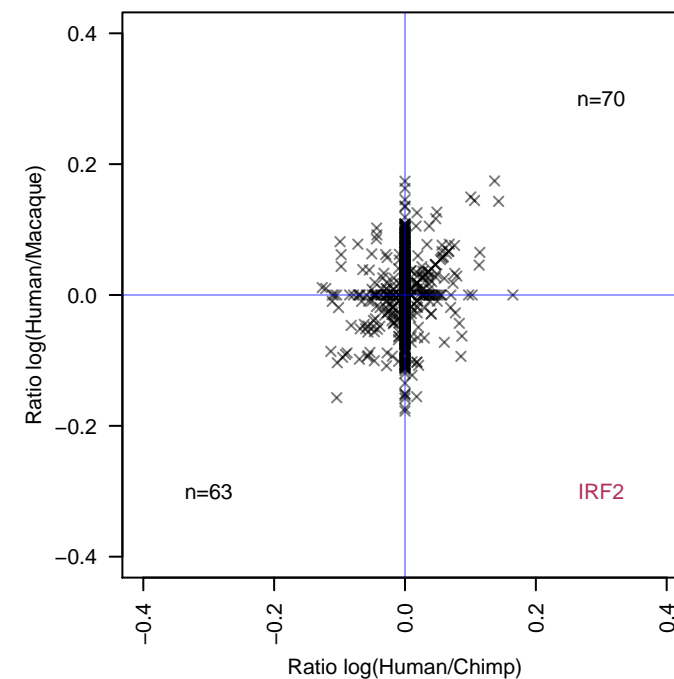

ChimpUpFibroblast.final.bed

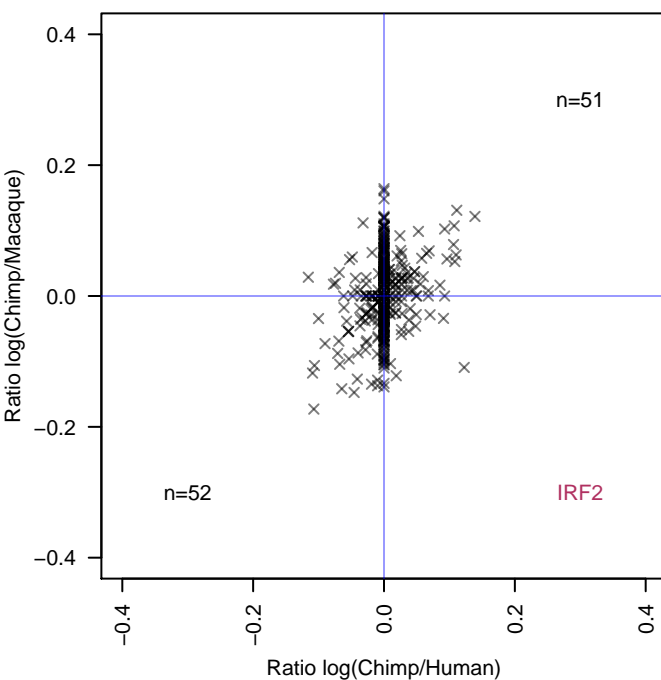

ChimpDownFibroblast.final.bed

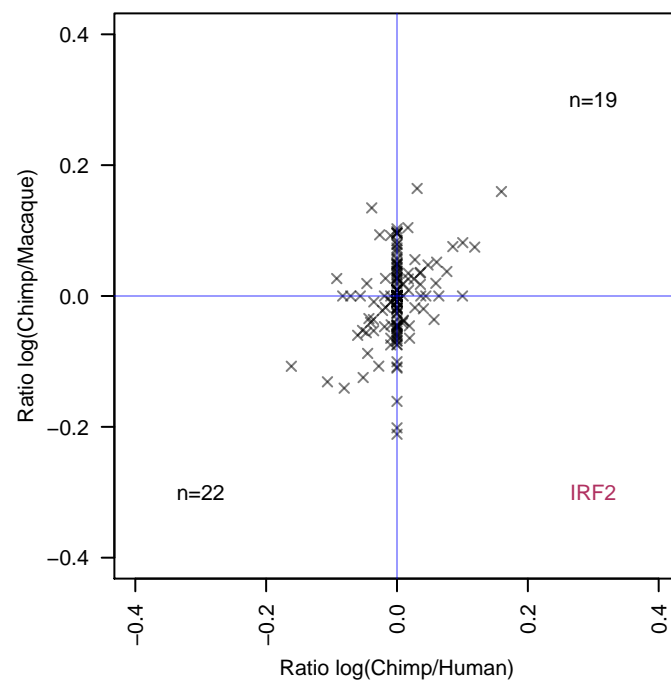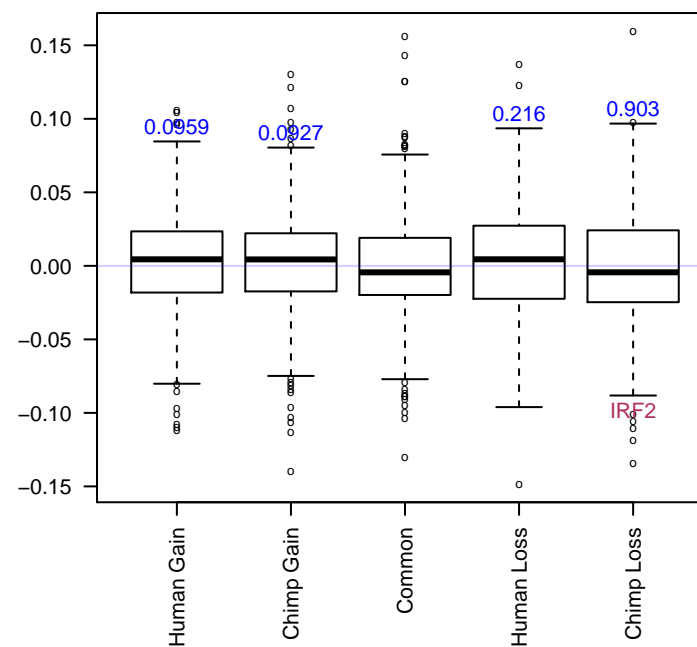

29 HumanUpFibroblast.final.bed

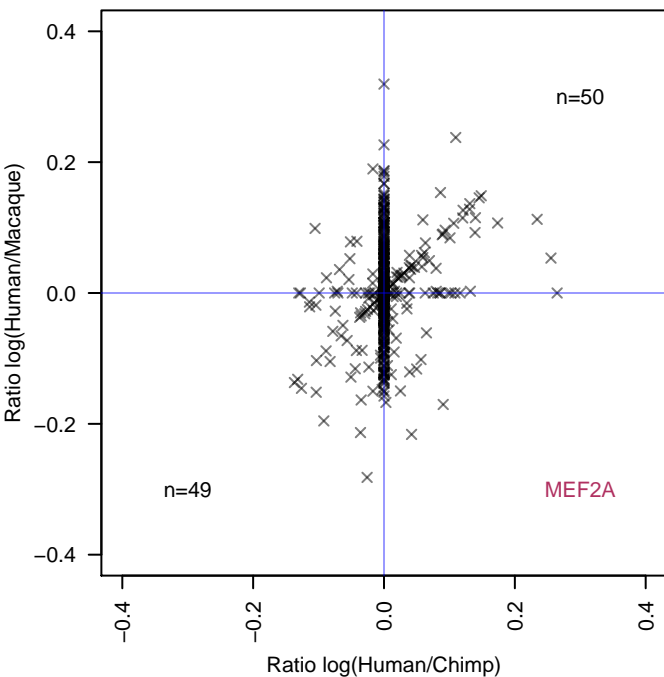

HumanDownFibroblast.final.bed

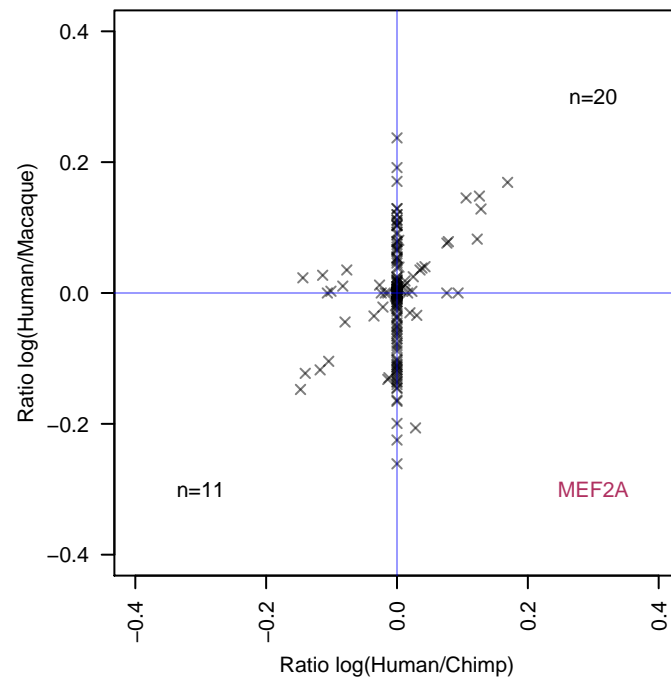

commonFibroblast.final.bed

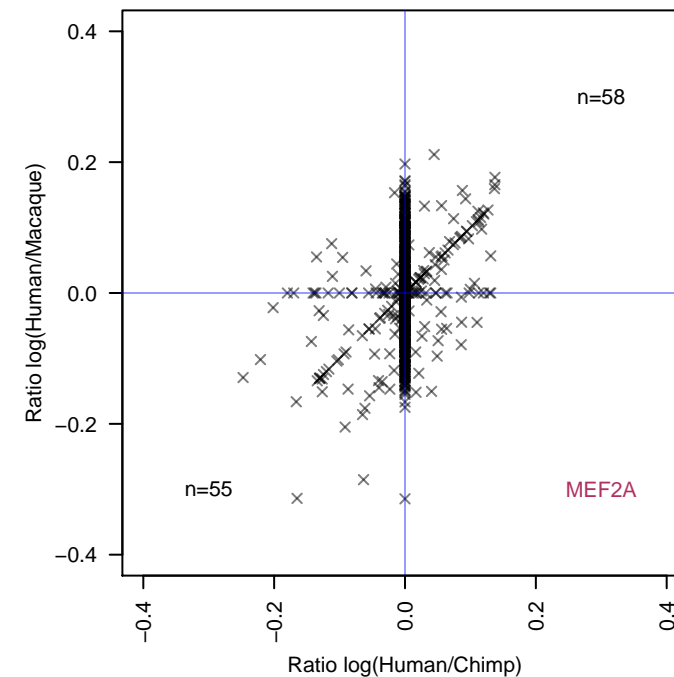

ChimpUpFibroblast.final.bed

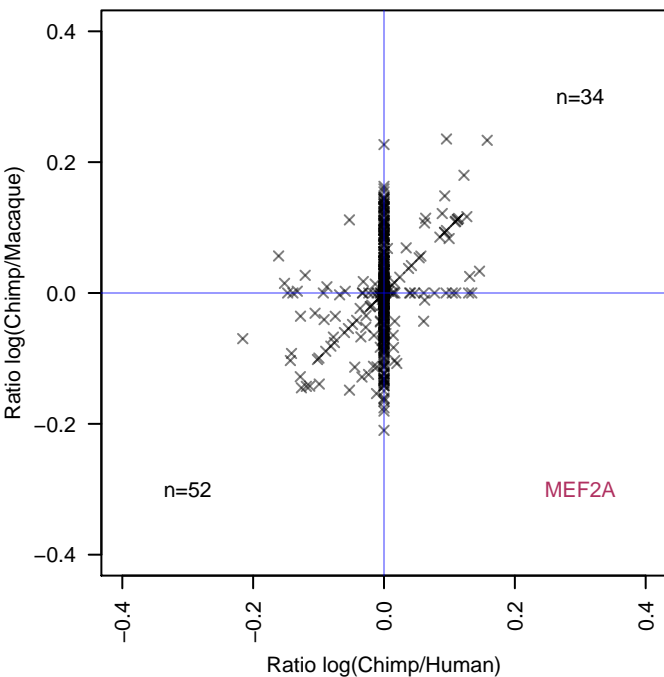

ChimpDownFibroblast.final.bed

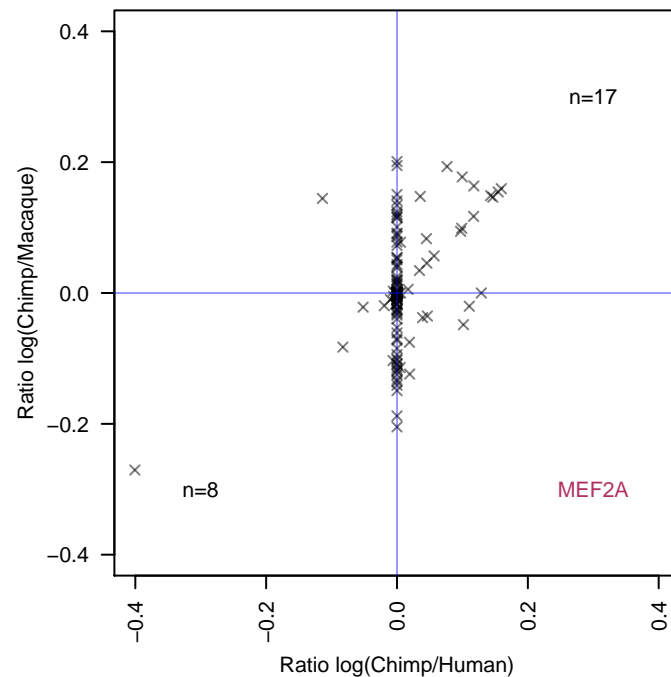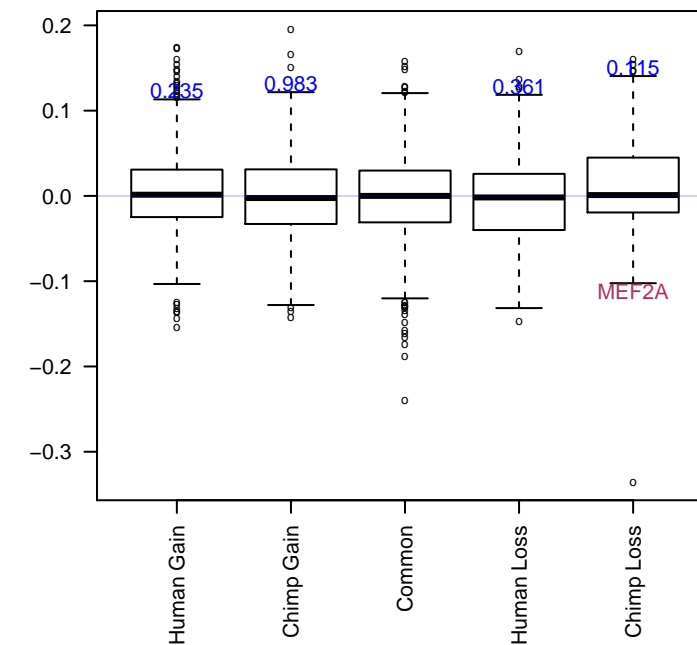

30

HumanUpFibroblast.final.bed

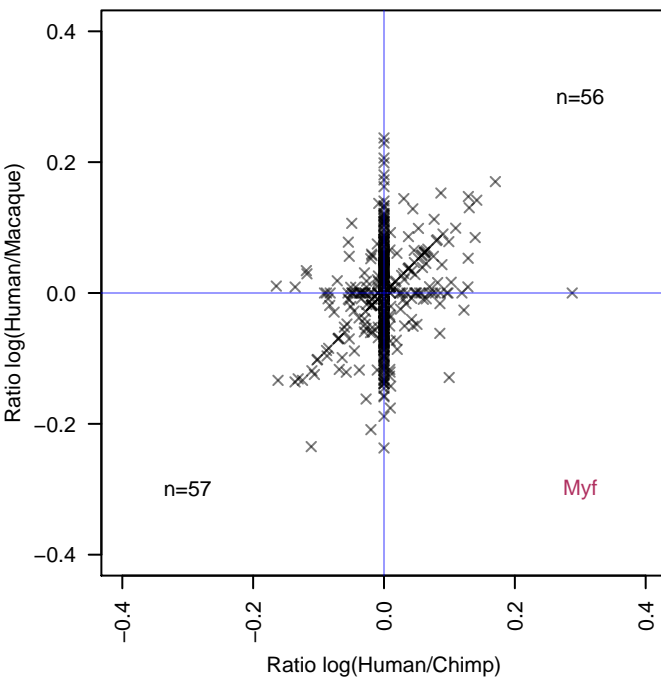

HumanDownFibroblast.final.bed

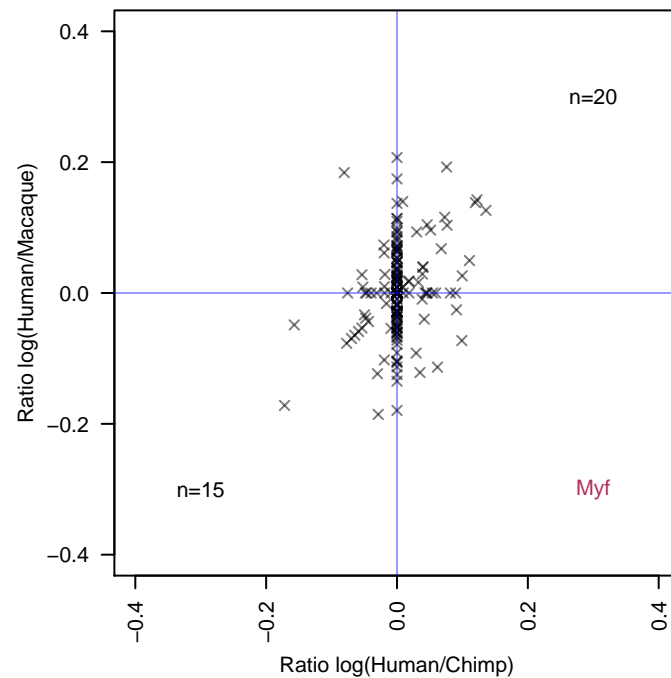

commonFibroblast.final.bed

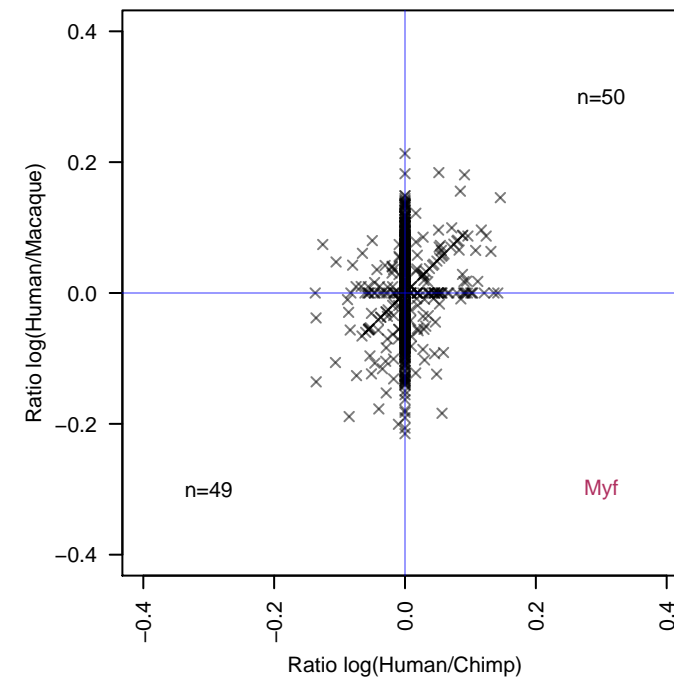

ChimpUpFibroblast.final.bed

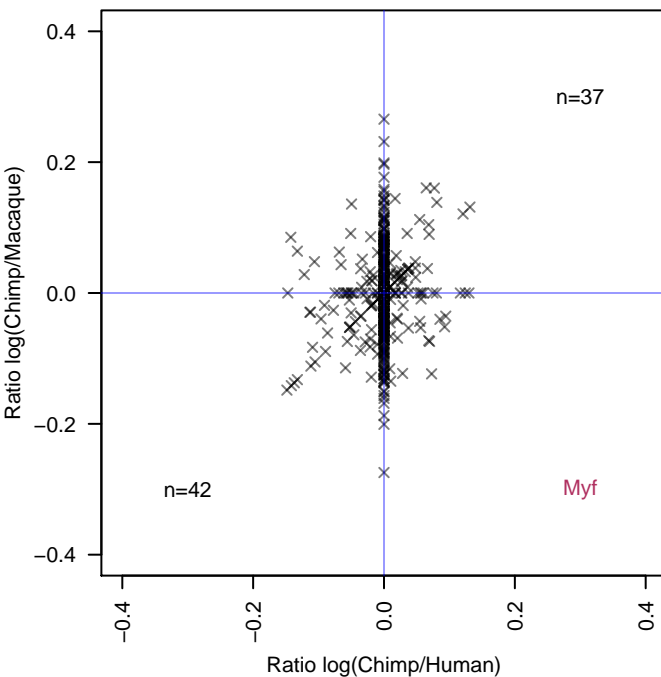

ChimpDownFibroblast.final.bed

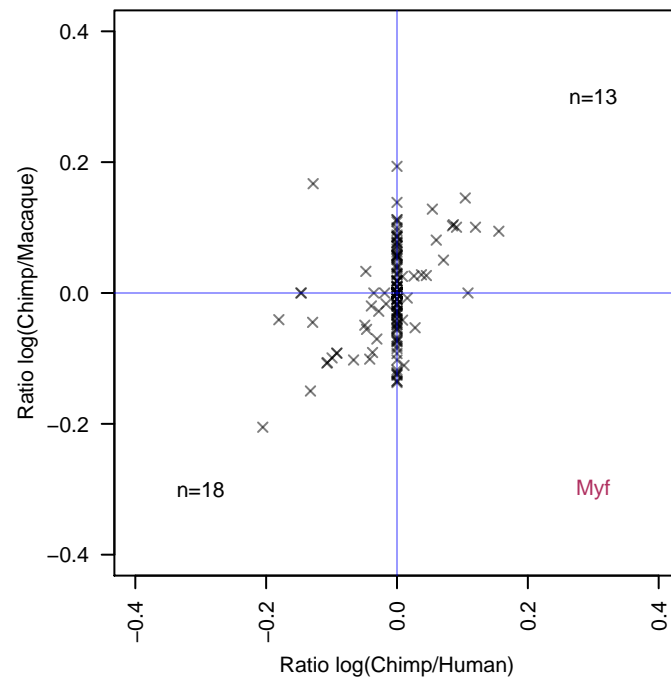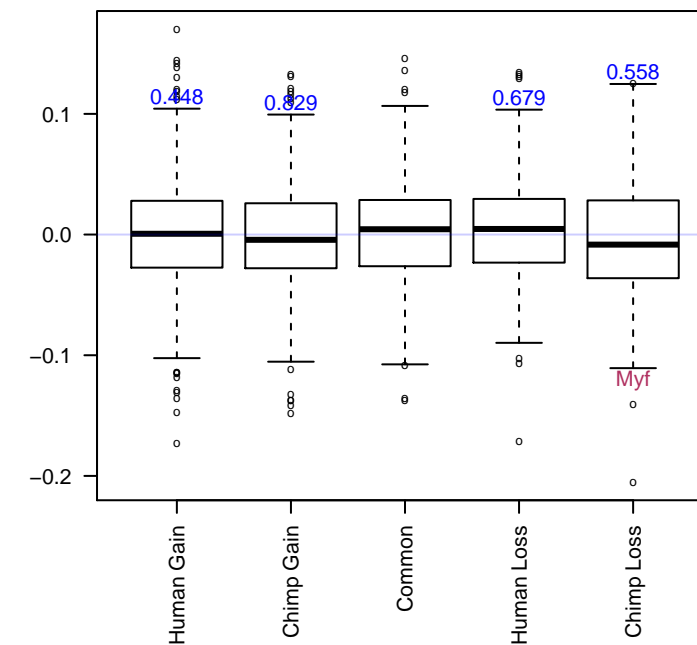

31

HumanUpFibroblast.final.bed

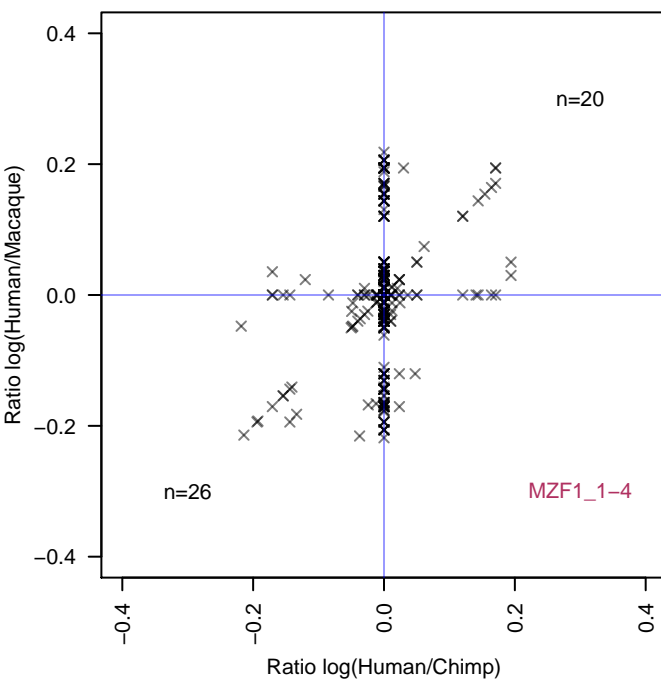

HumanDownFibroblast.final.bed

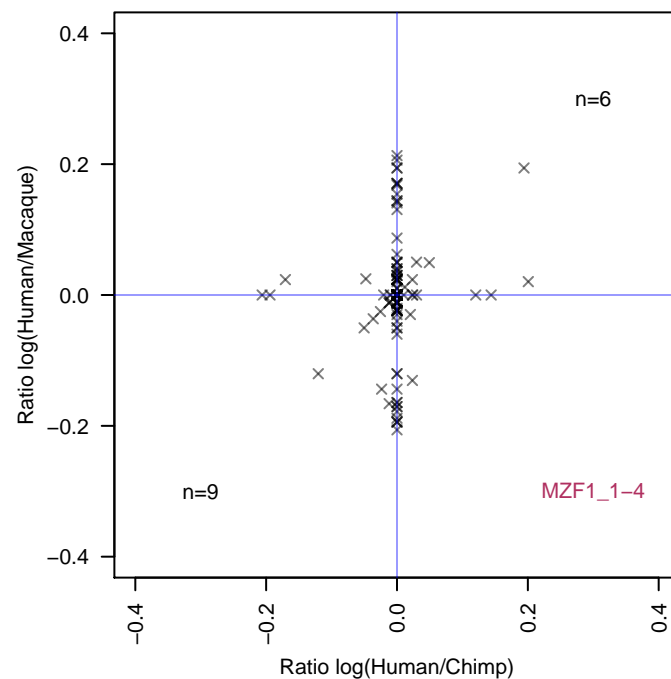

commonFibroblast.final.bed

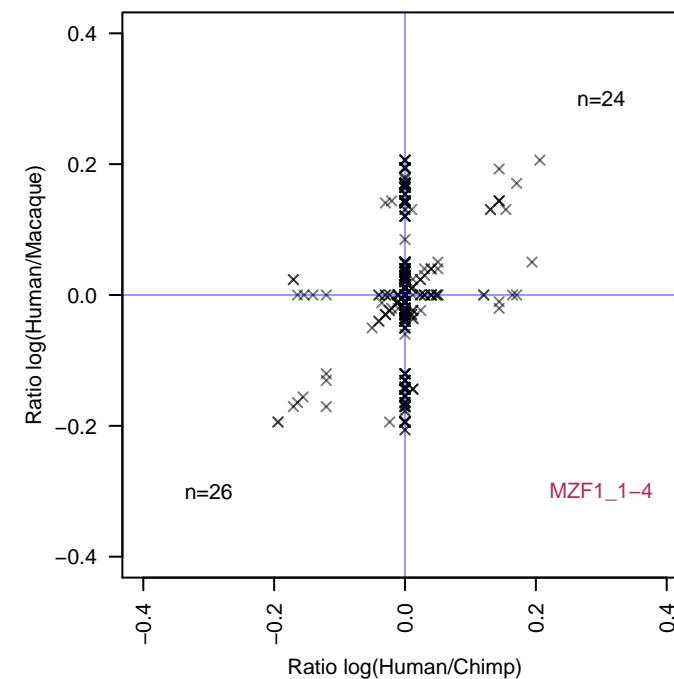

ChimpUpFibroblast.final.bed

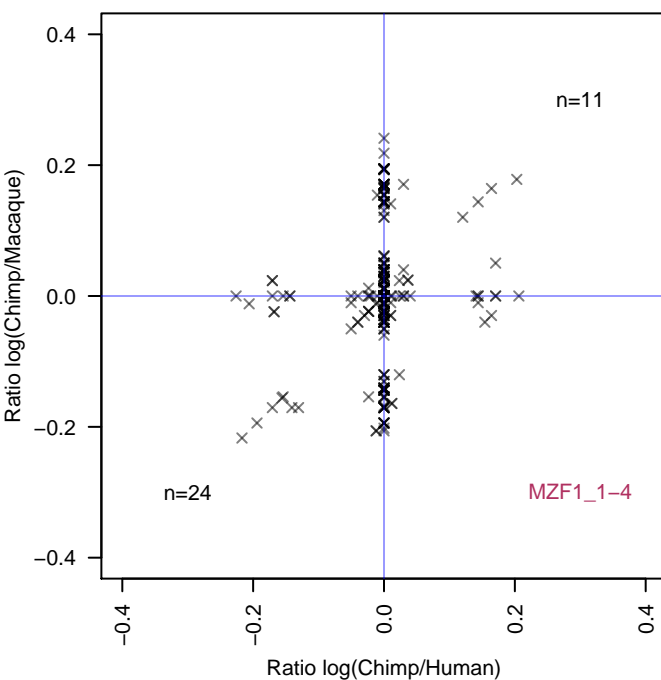

ChimpDownFibroblast.final.bed

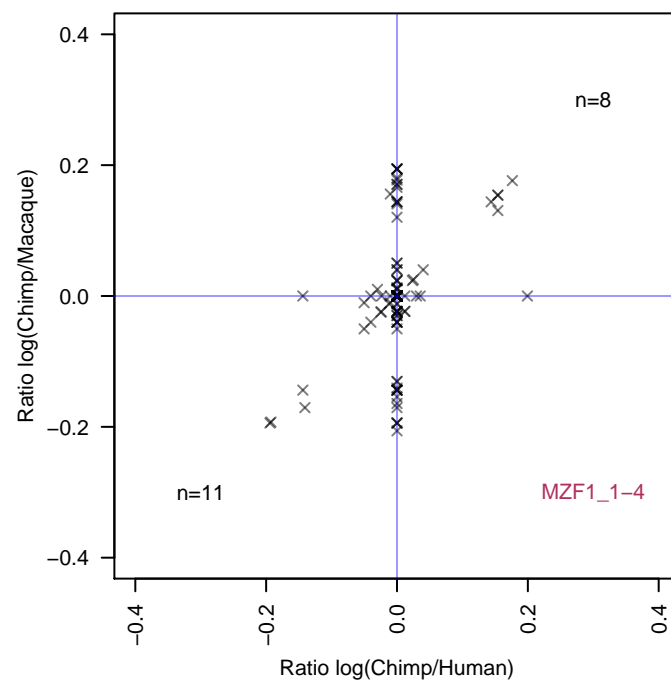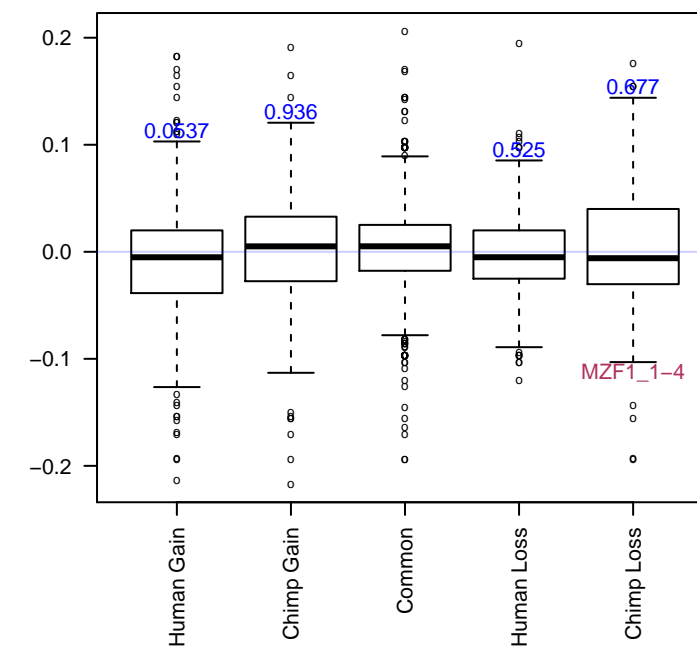

32

HumanUpFibroblast.final.bed

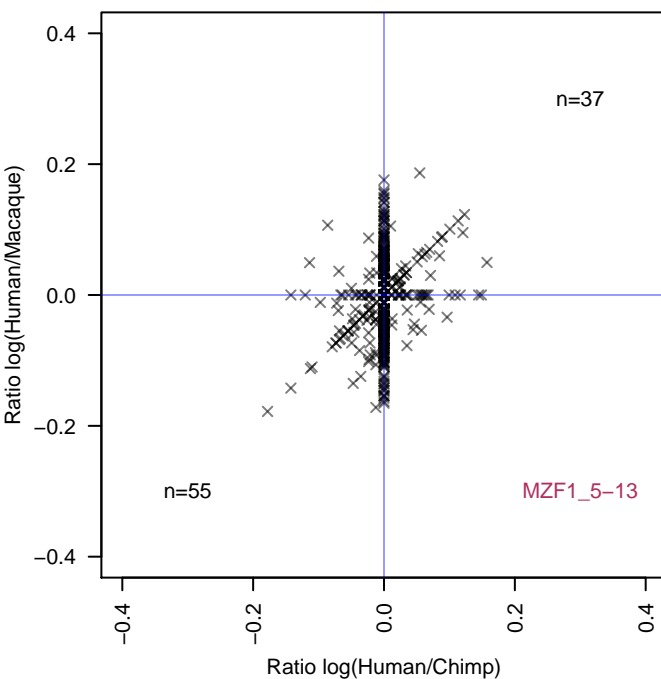

HumanDownFibroblast.final.bed

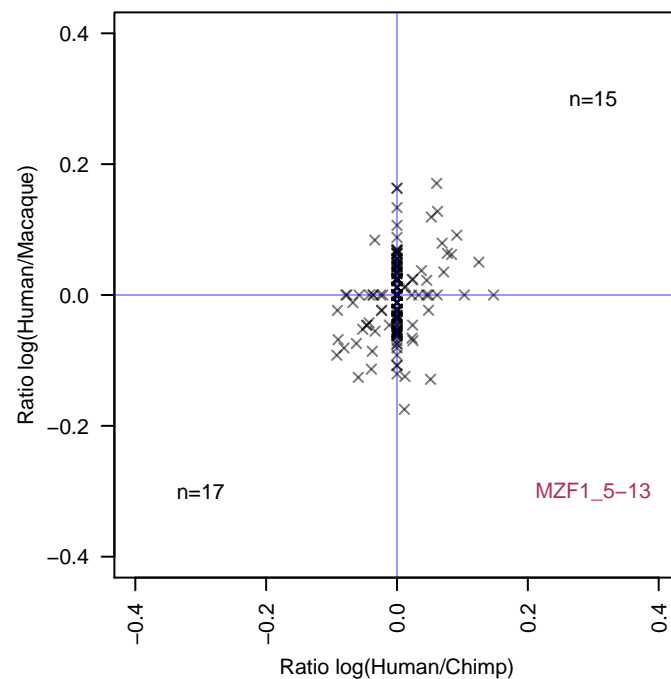

commonFibroblast.final.bed

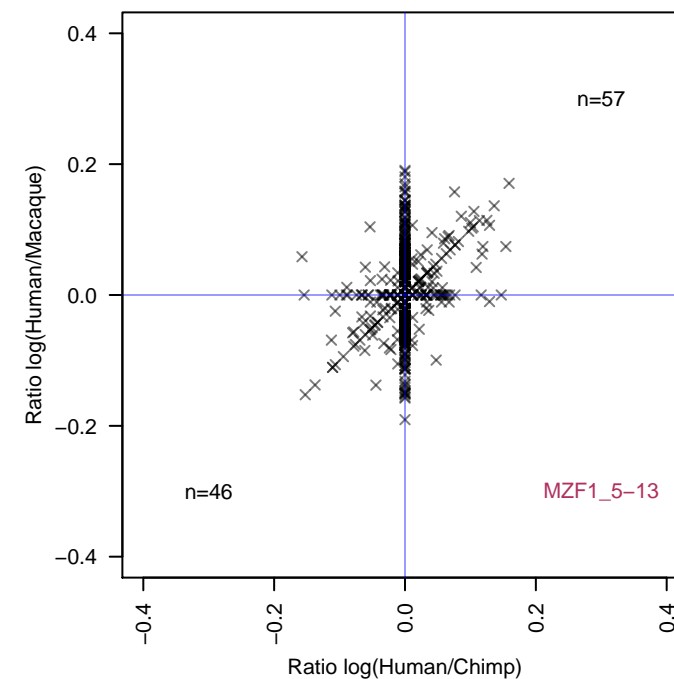

ChimpUpFibroblast.final.bed

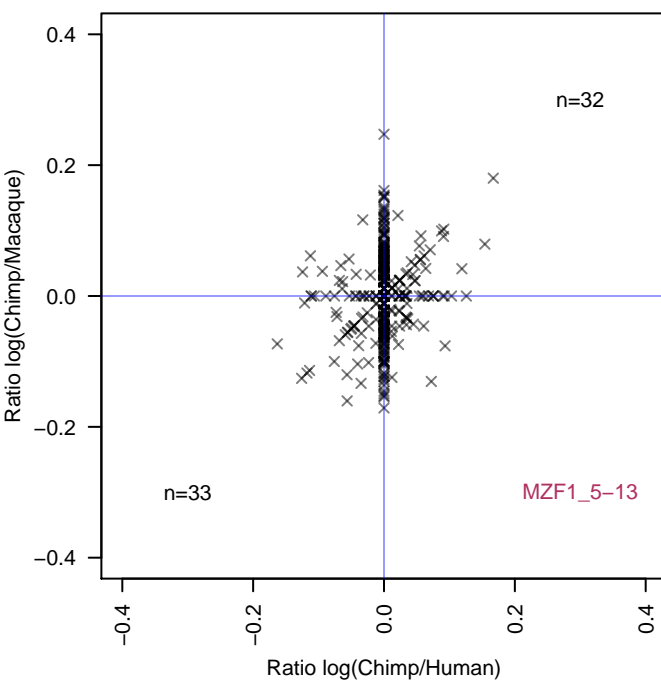

ChimpDownFibroblast.final.bed

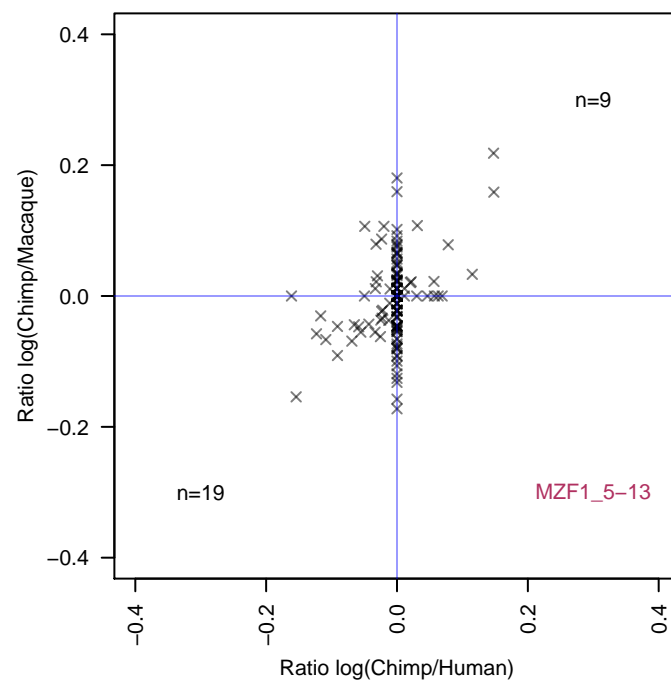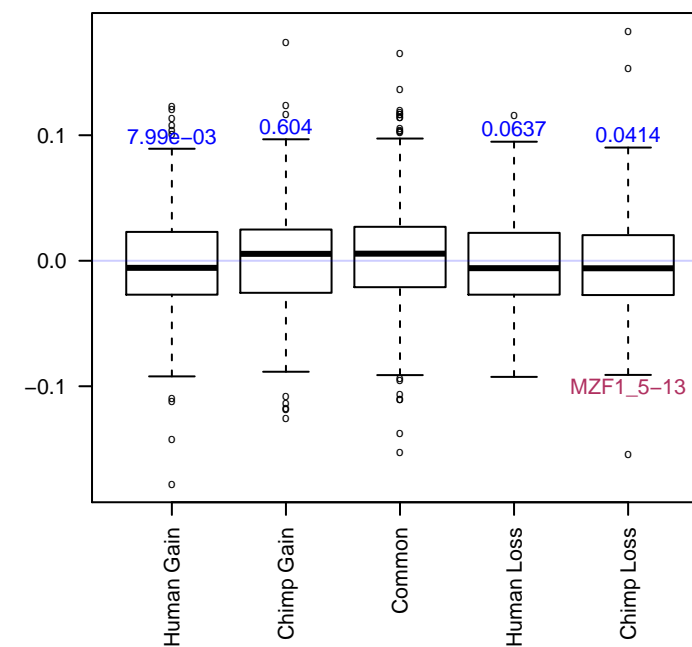

33

HumanUpFibroblast.final.bed

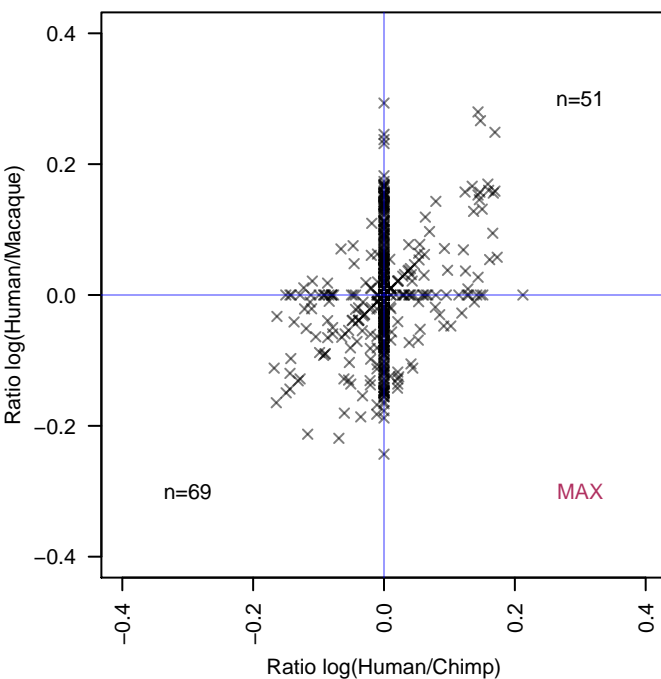

HumanDownFibroblast.final.bed

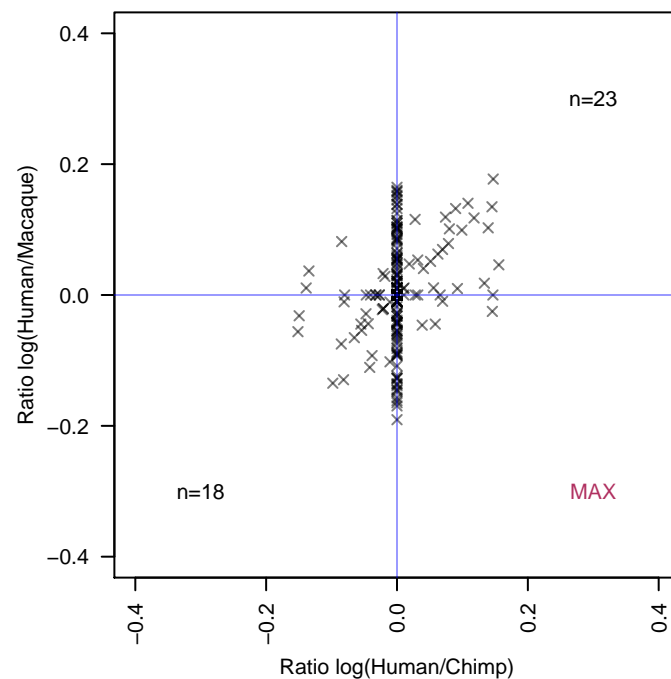

commonFibroblast.final.bed

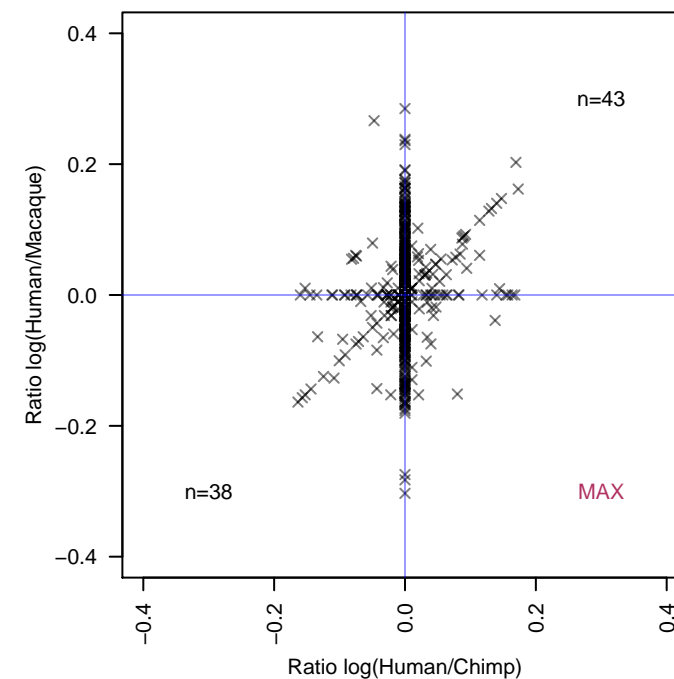

ChimpUpFibroblast.final.bed

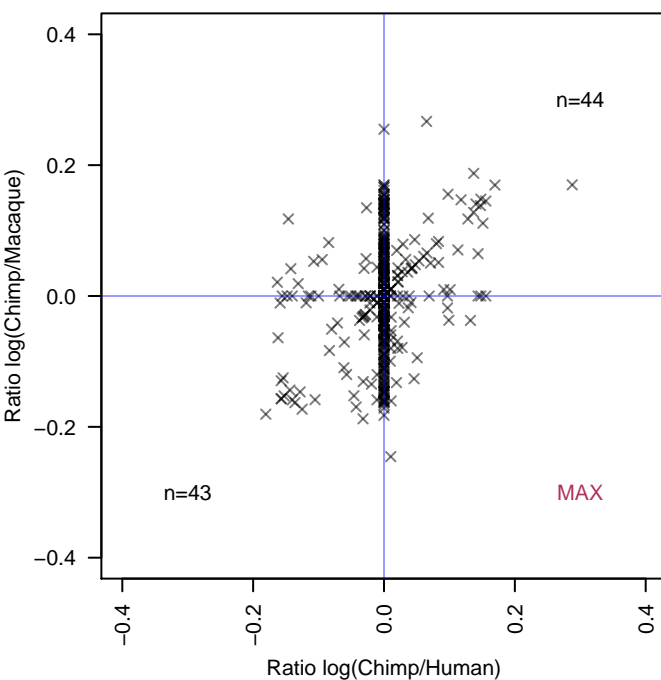

ChimpDownFibroblast.final.bed

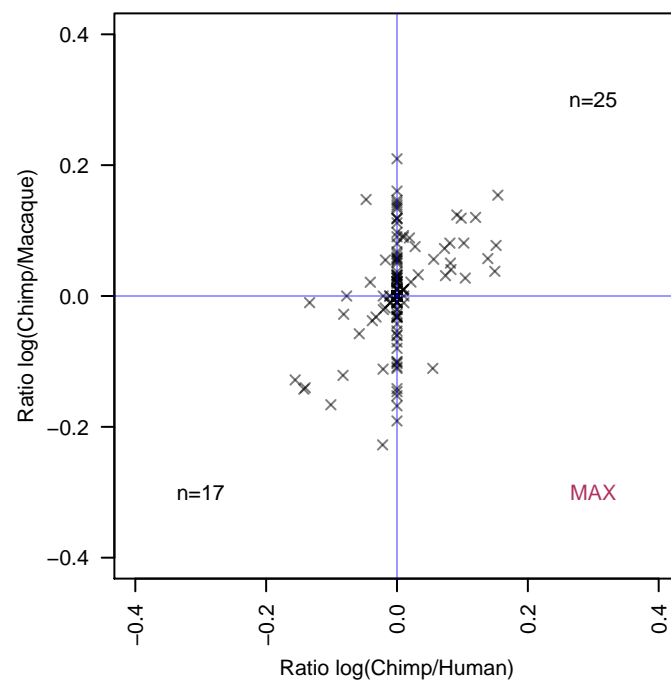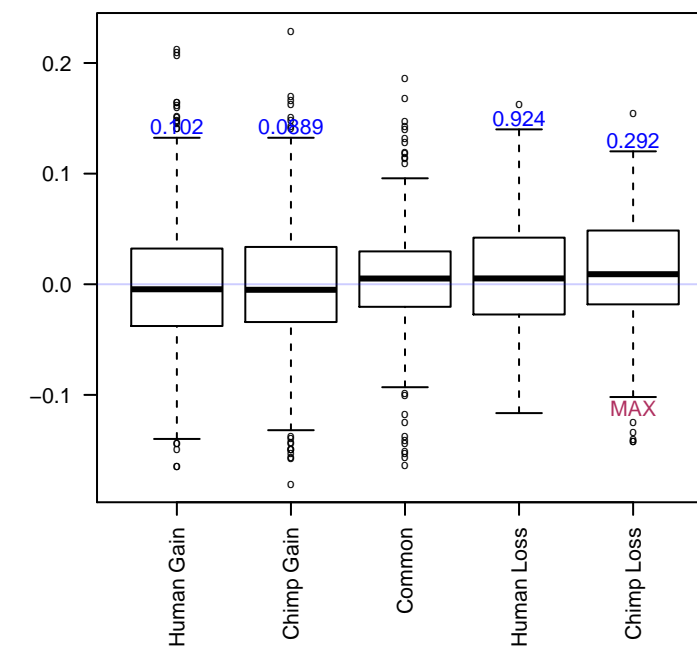

34

HumanUpFibroblast.final.bed

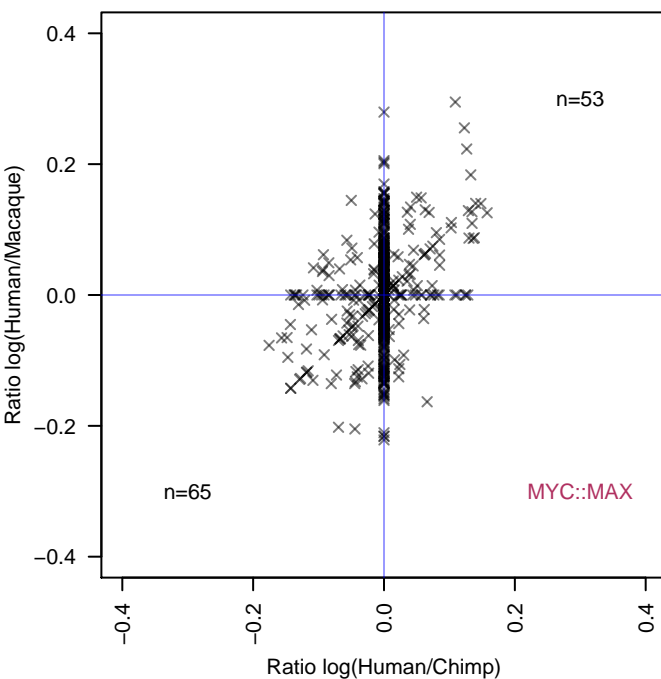

HumanDownFibroblast.final.bed

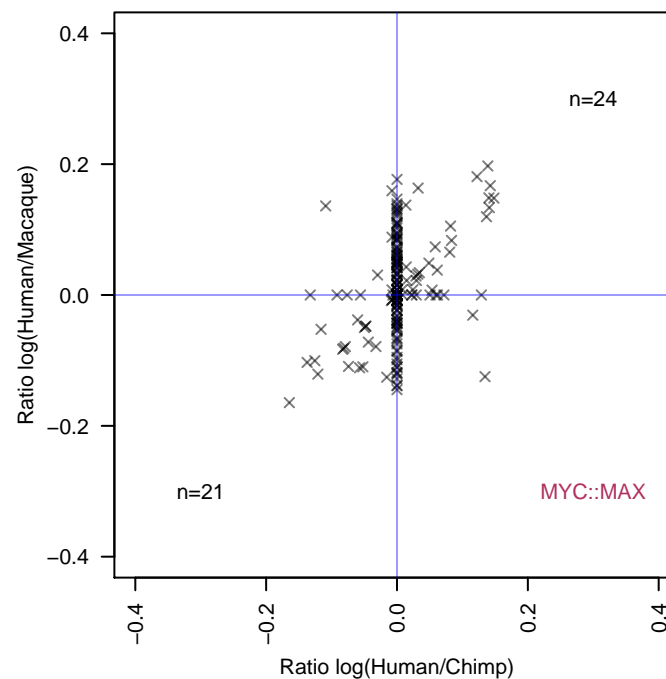

commonFibroblast.final.bed

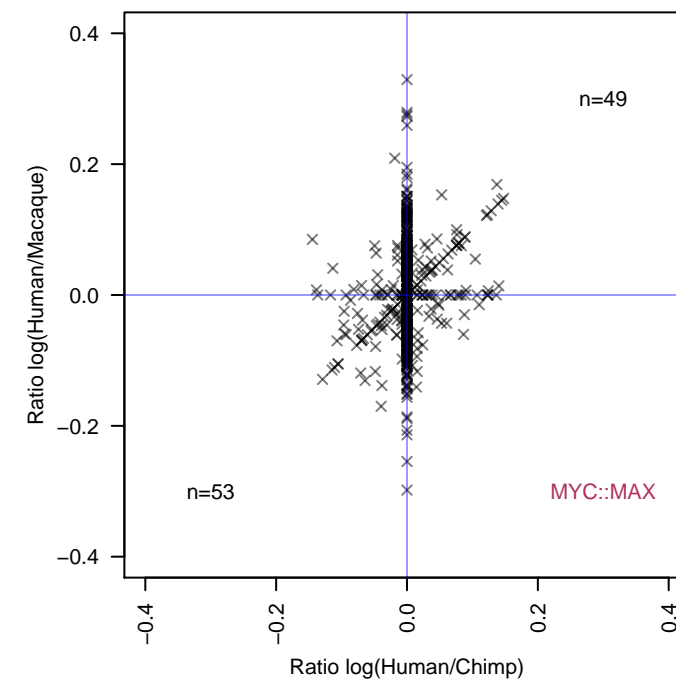

ChimpUpFibroblast.final.bed

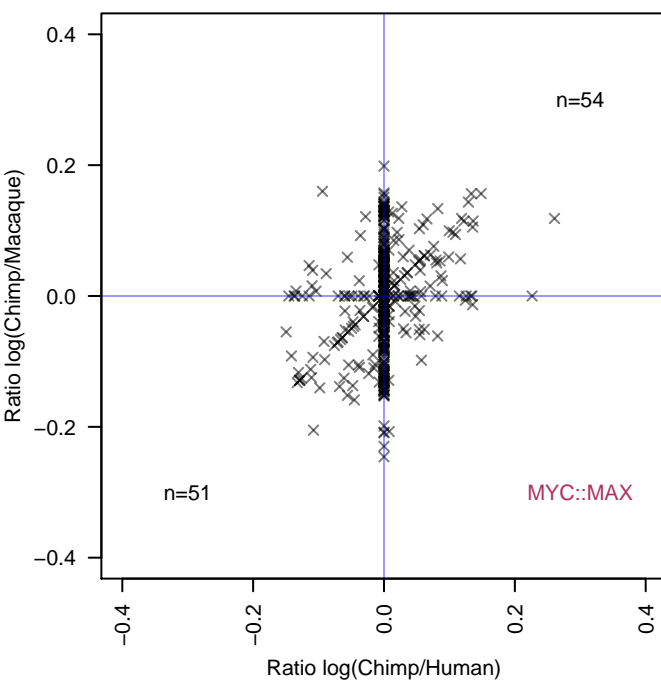

ChimpDownFibroblast.final.bed

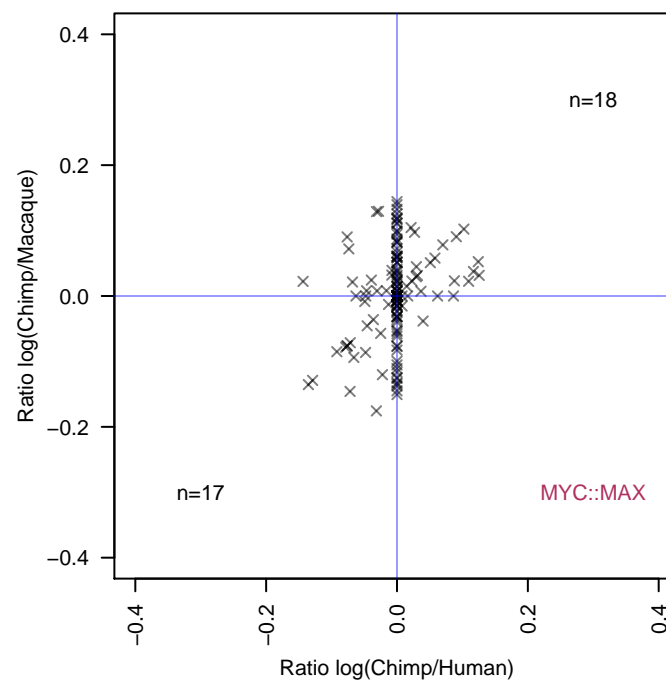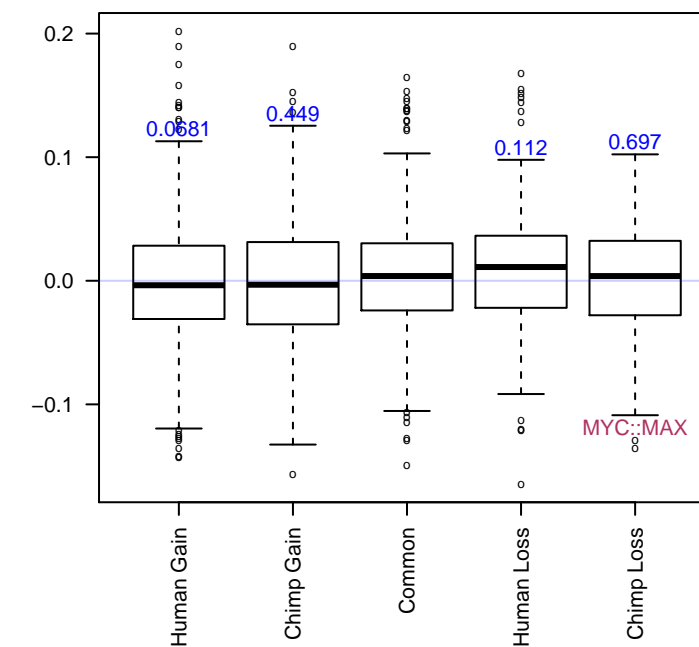

35

HumanUpFibroblast.final.bed

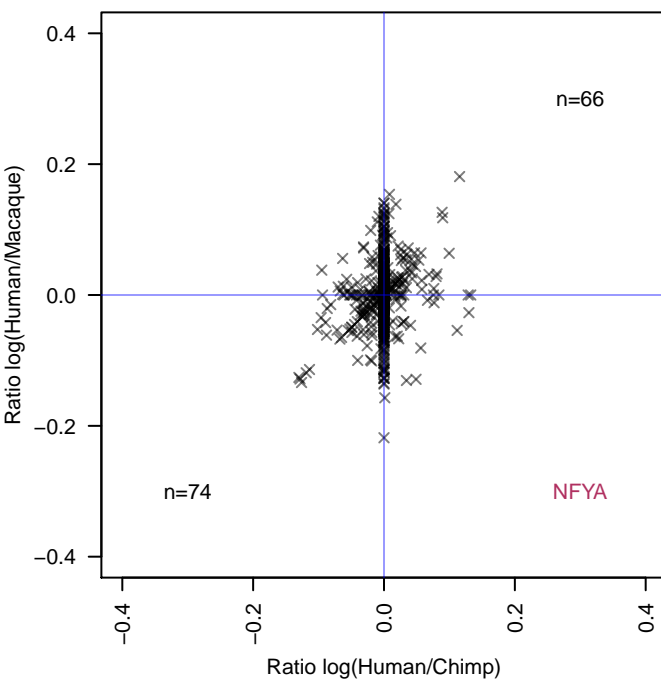

HumanDownFibroblast.final.bed

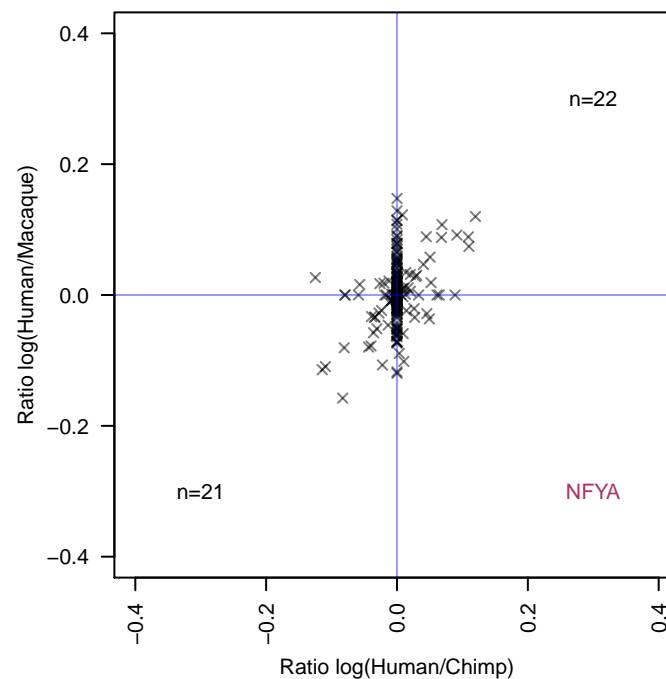

commonFibroblast.final.bed

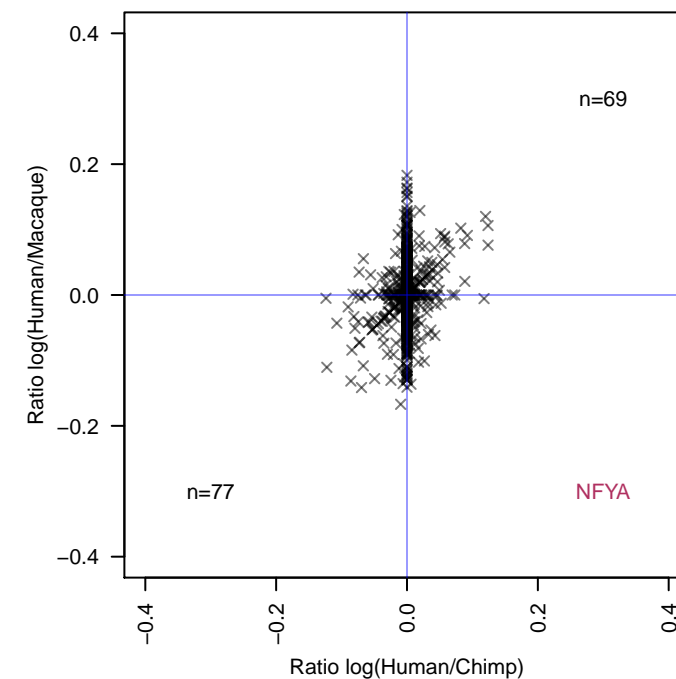

ChimpUpFibroblast.final.bed

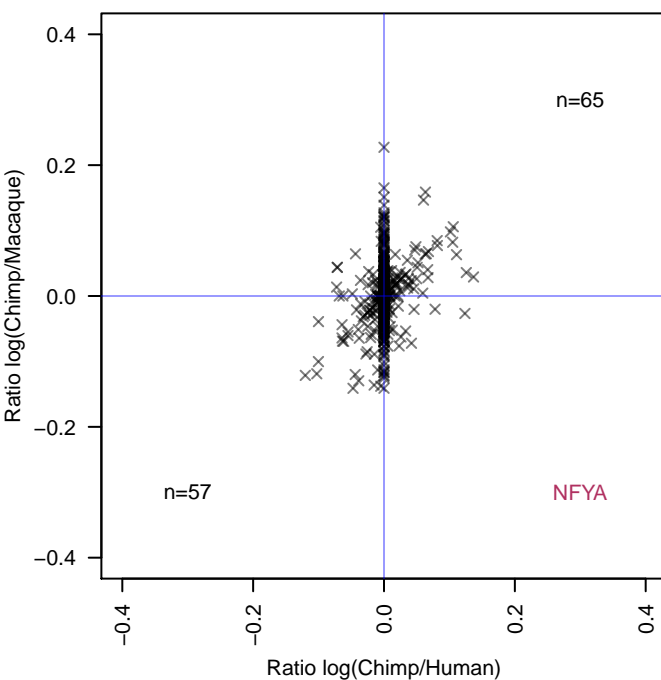

ChimpDownFibroblast.final.bed

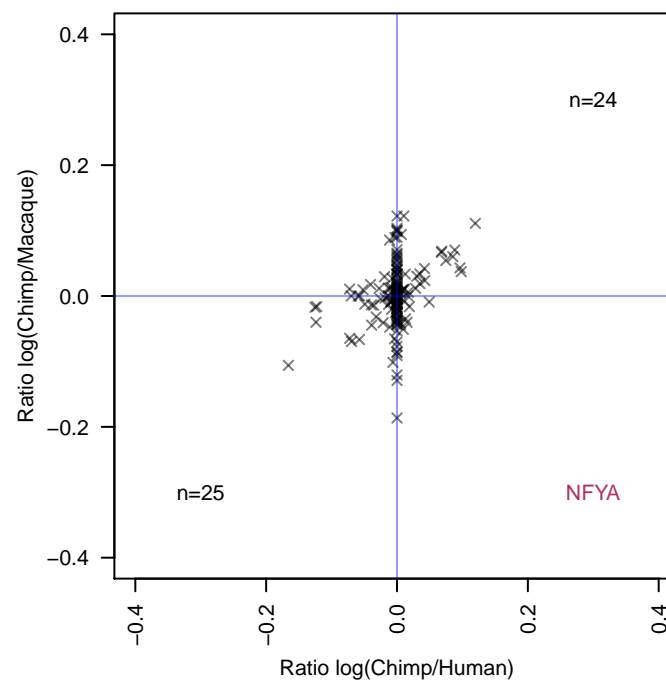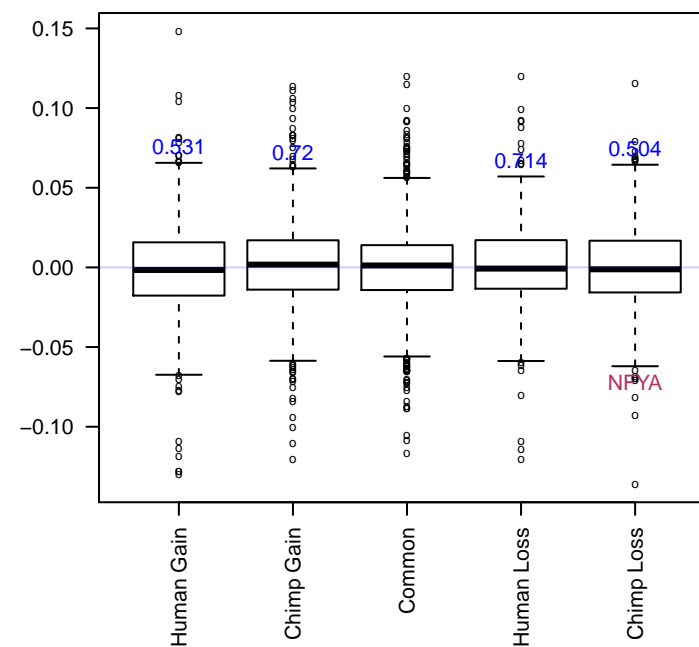

HumanUpFibroblast.final.bed

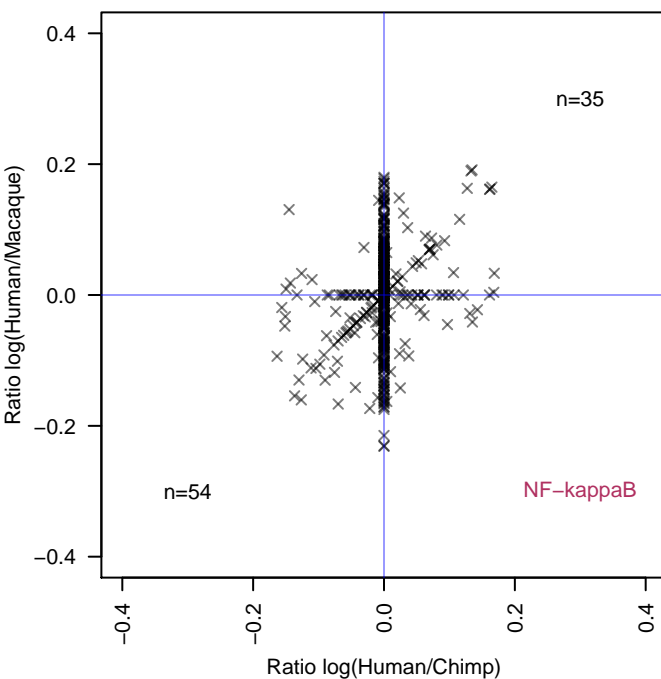

HumanDownFibroblast.final.bed

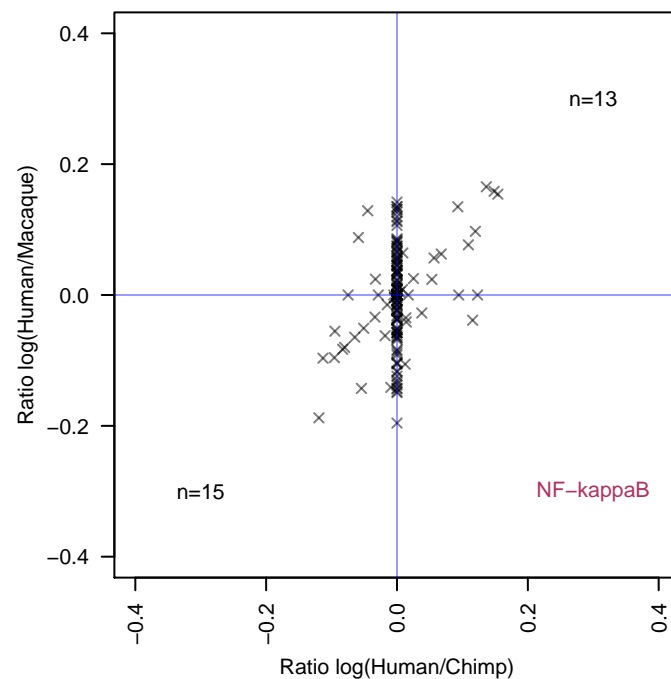

commonFibroblast.final.bed

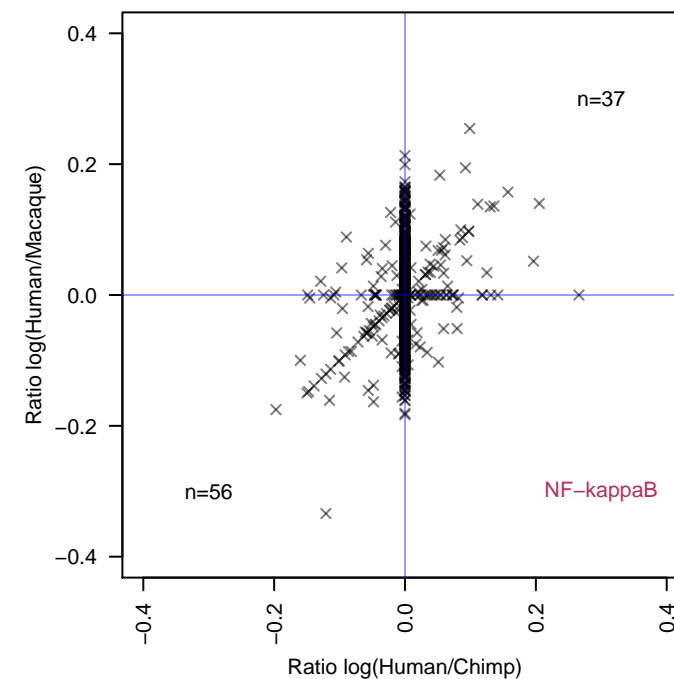

ChimpUpFibroblast.final.bed

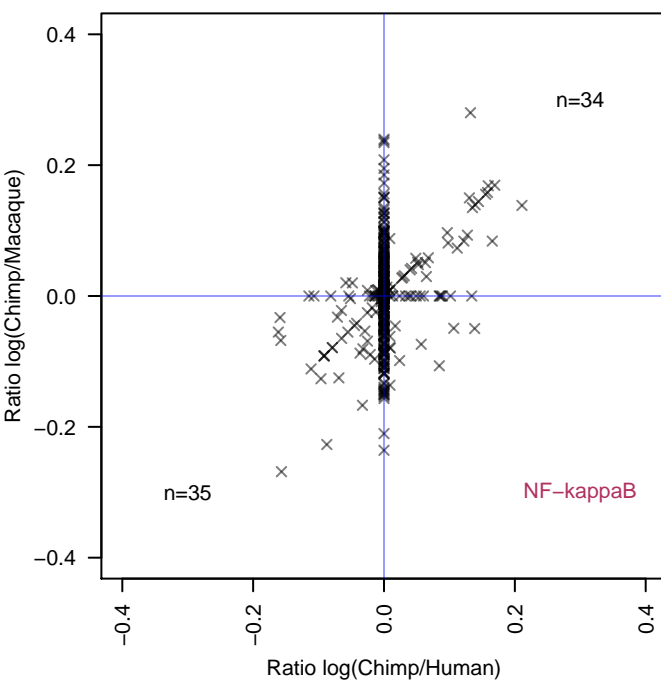

ChimpDownFibroblast.final.bed

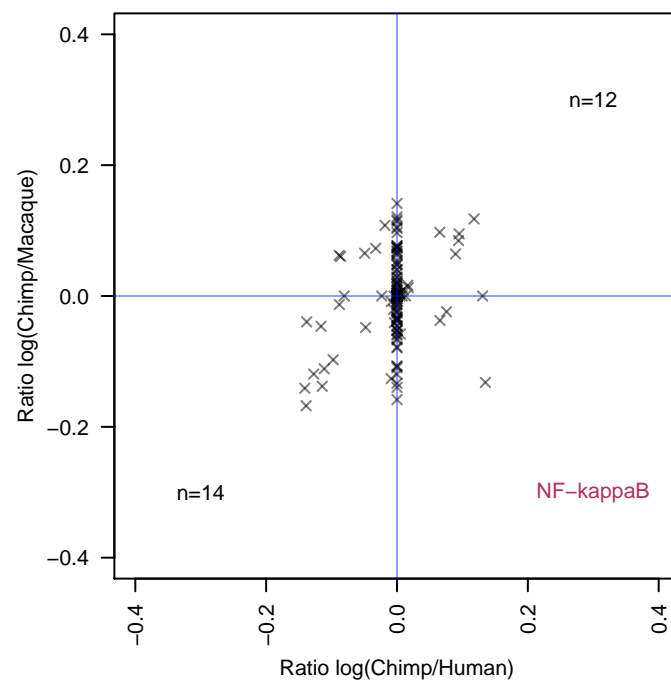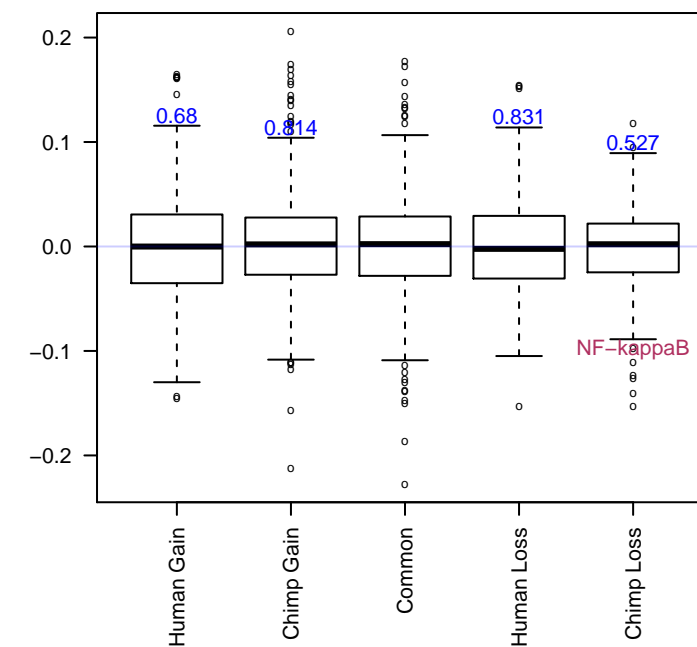

37

HumanUpFibroblast.final.bed

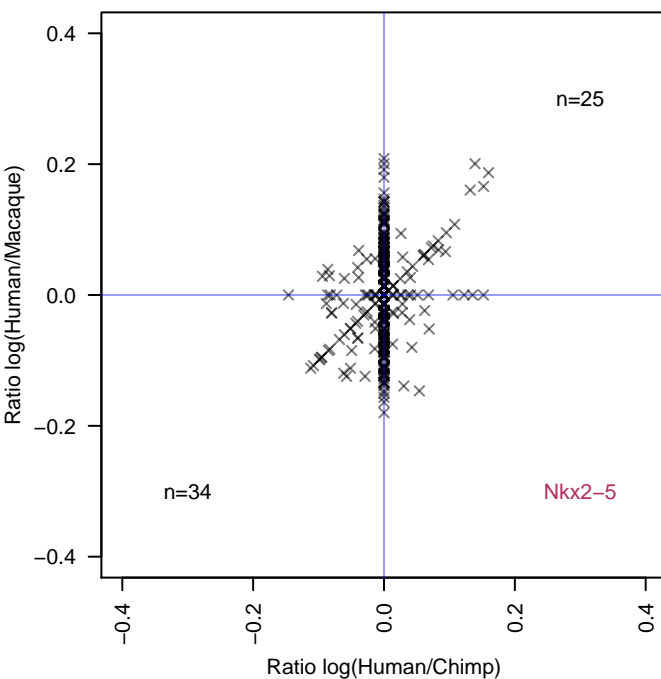

HumanDownFibroblast.final.bed

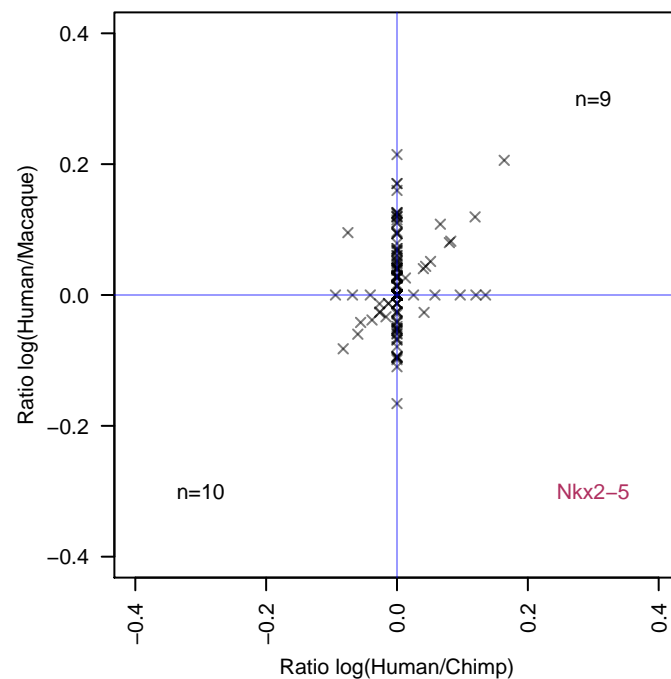

commonFibroblast.final.bed

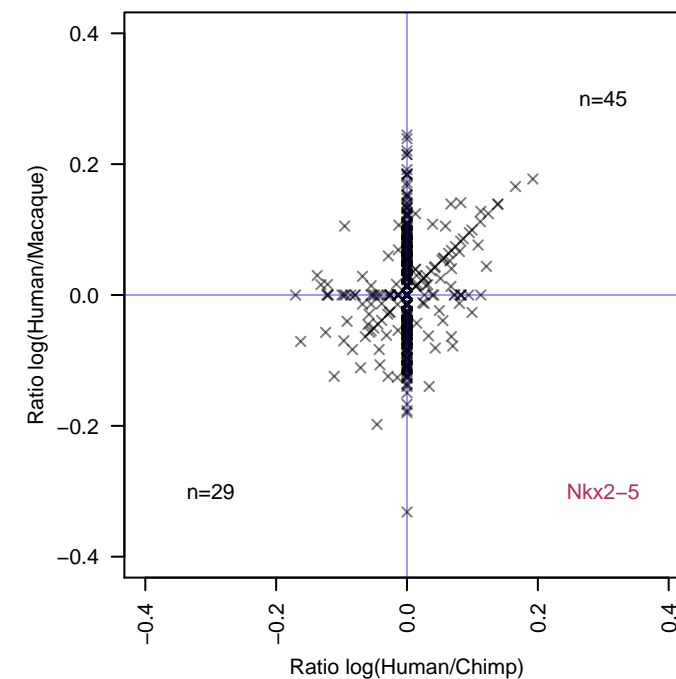

ChimpUpFibroblast.final.bed

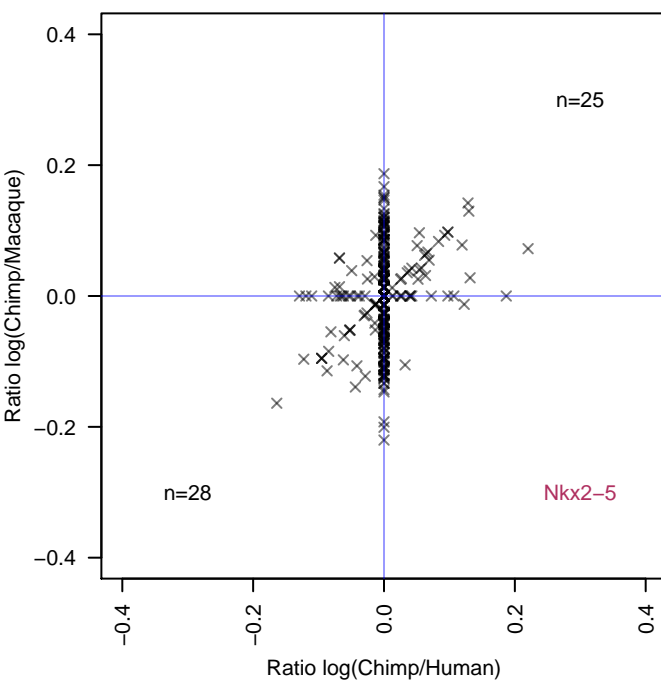

ChimpDownFibroblast.final.bed

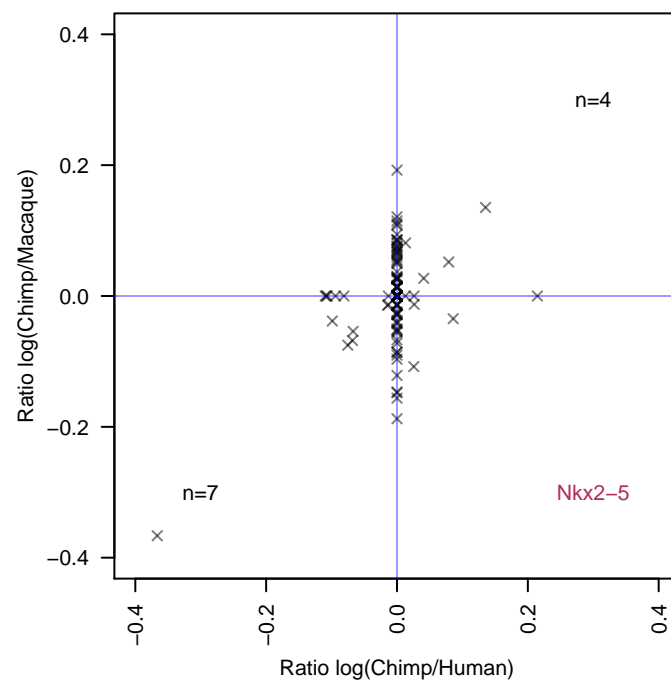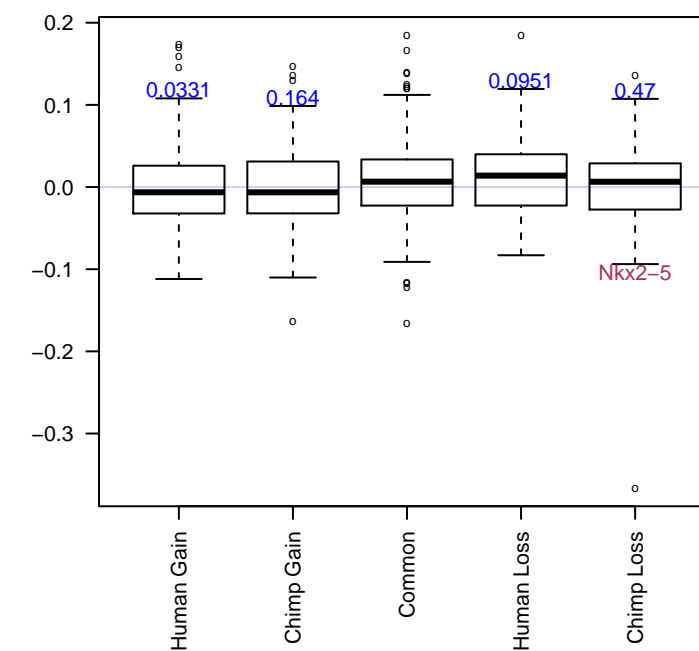

38

HumanUpFibroblast.final.bed

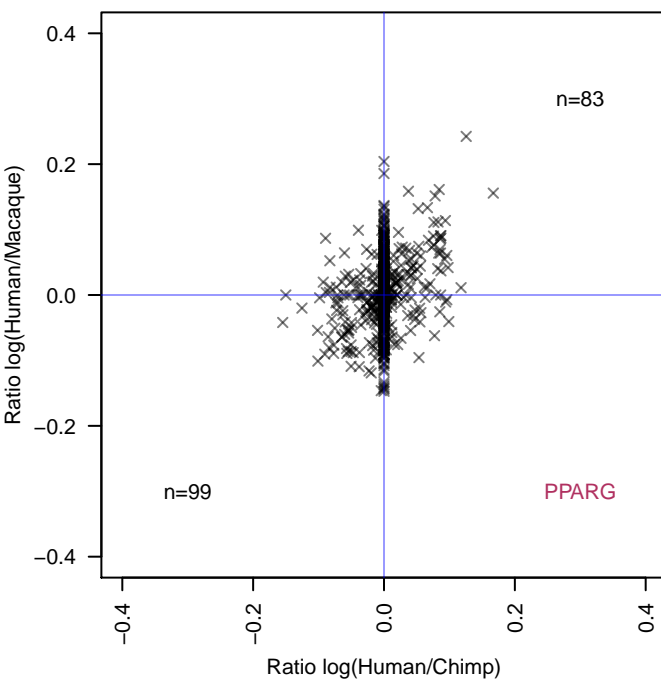

HumanDownFibroblast.final.bed

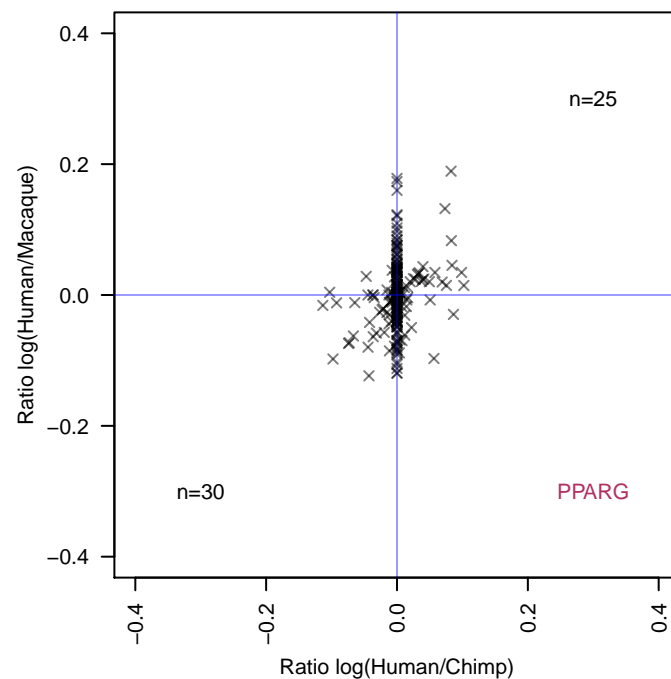

commonFibroblast.final.bed

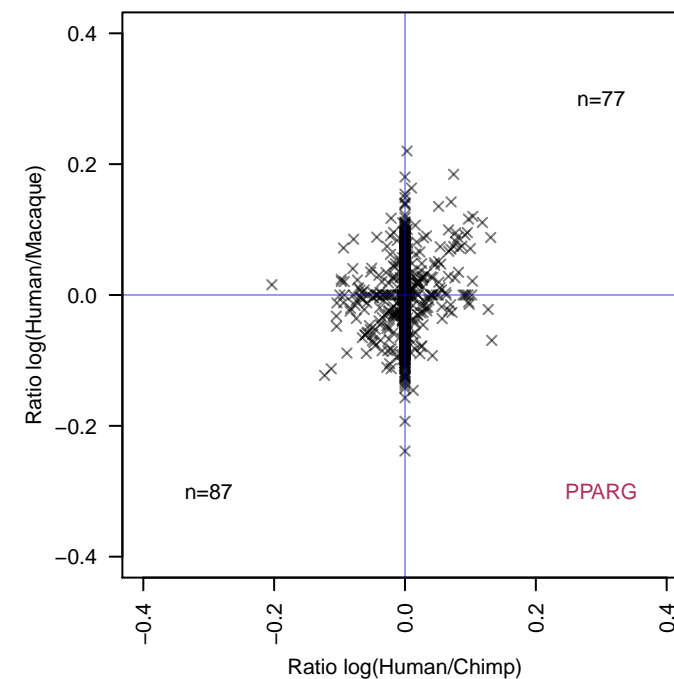

ChimpUpFibroblast.final.bed

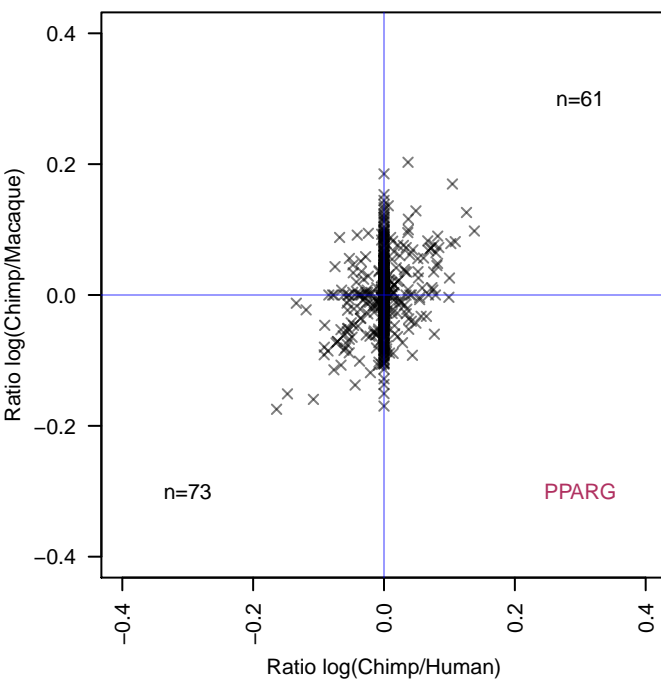

ChimpDownFibroblast.final.bed

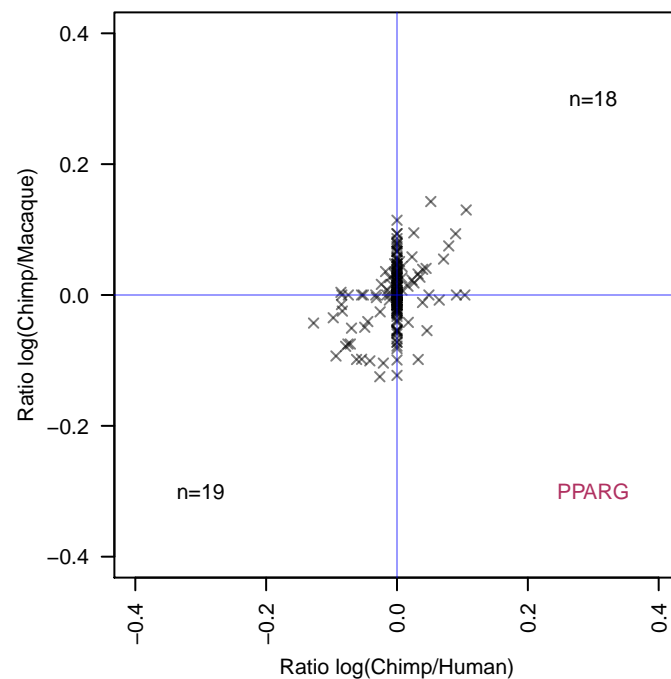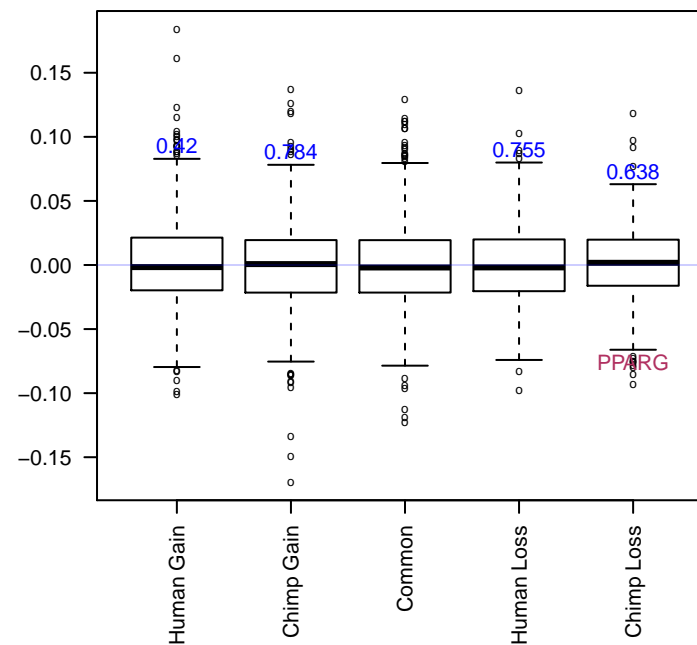

39

HumanUpFibroblast.final.bed

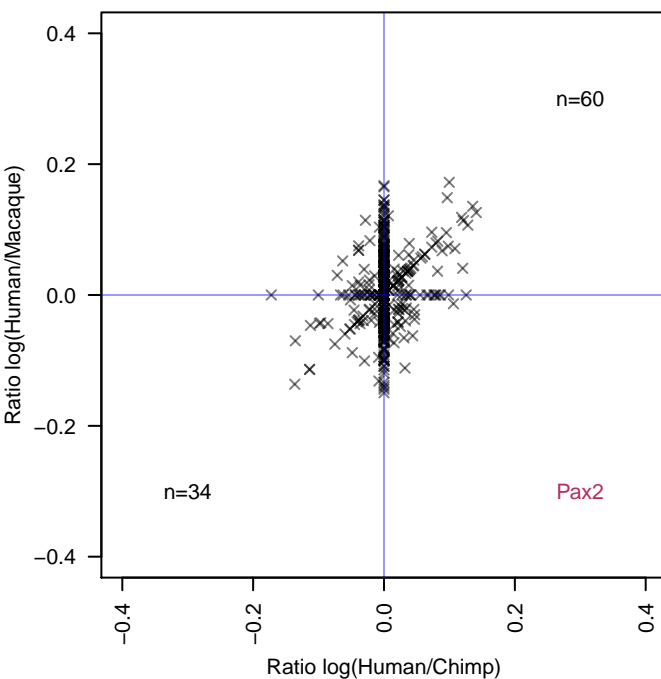

HumanDownFibroblast.final.bed

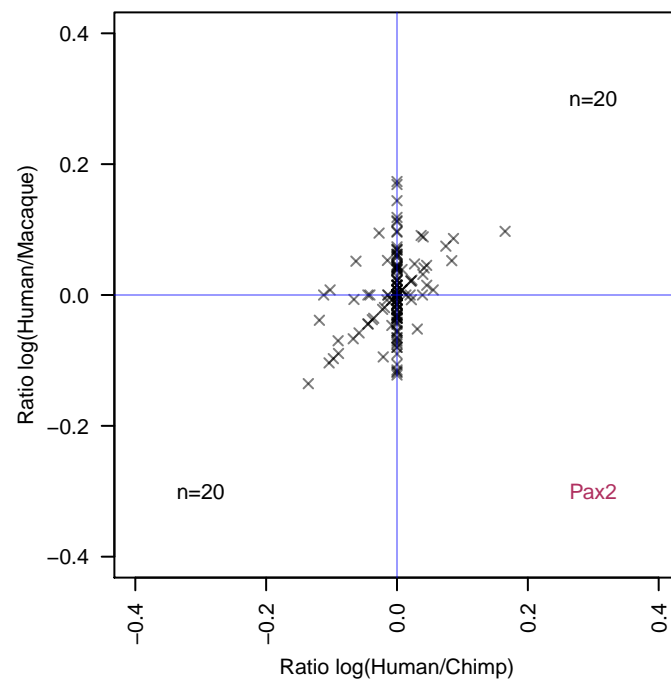

commonFibroblast.final.bed

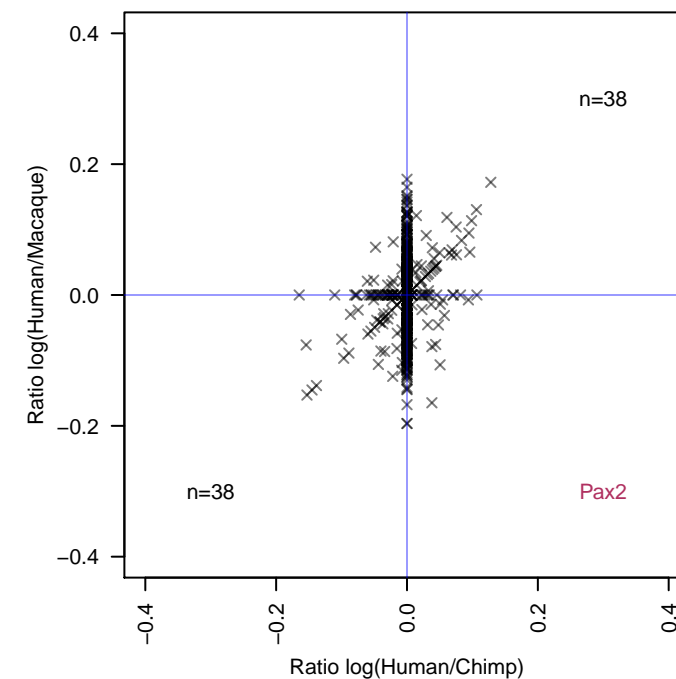

ChimpUpFibroblast.final.bed

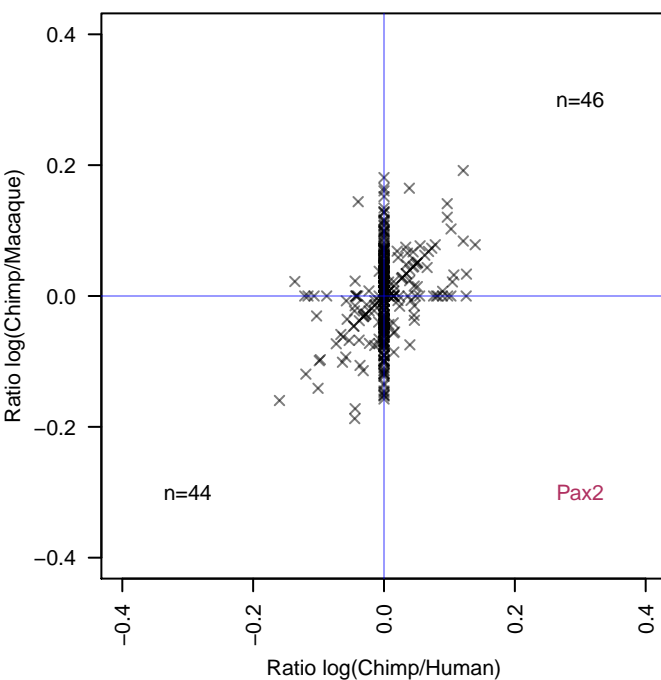

ChimpDownFibroblast.final.bed

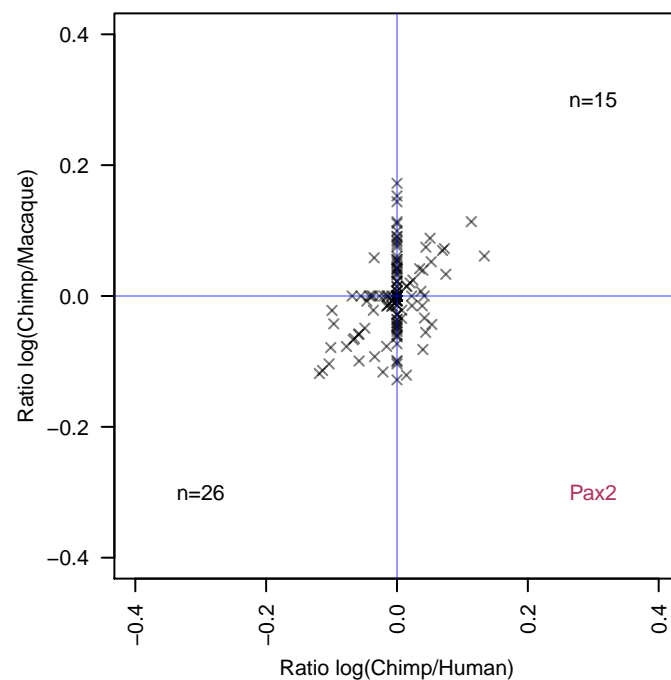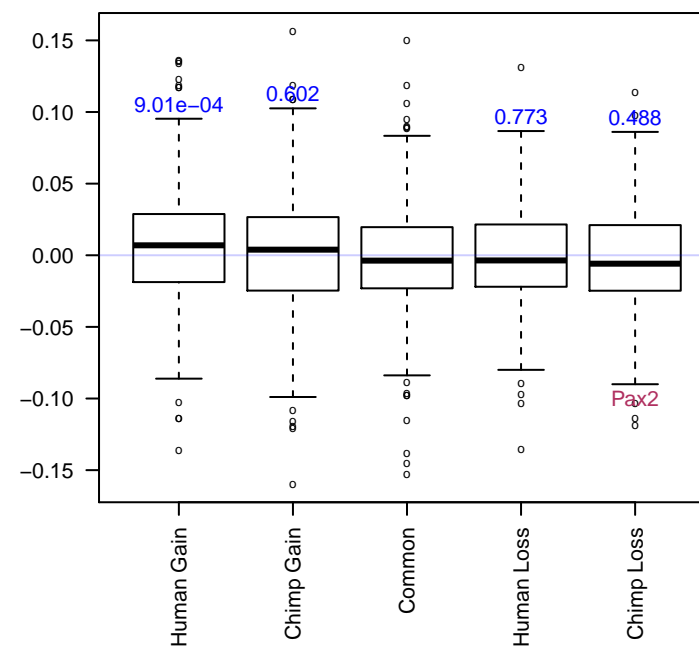

40

HumanUpFibroblast.final.bed

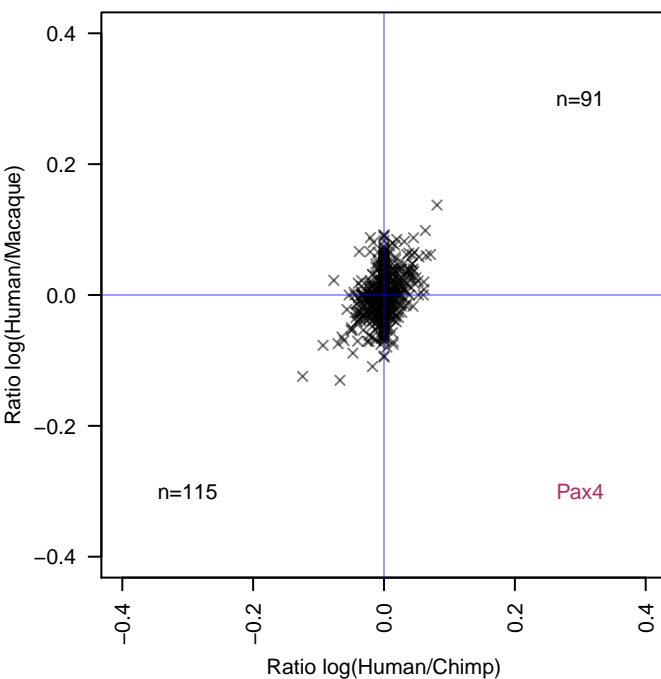

HumanDownFibroblast.final.bed

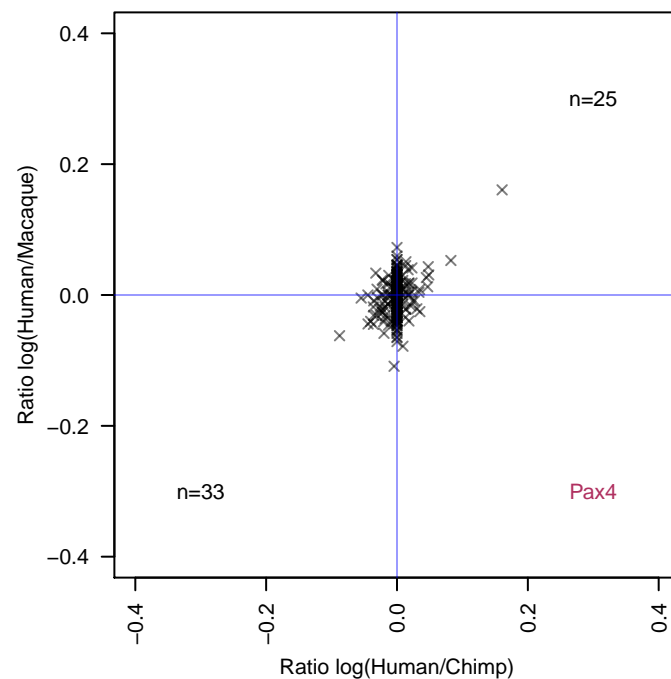

commonFibroblast.final.bed

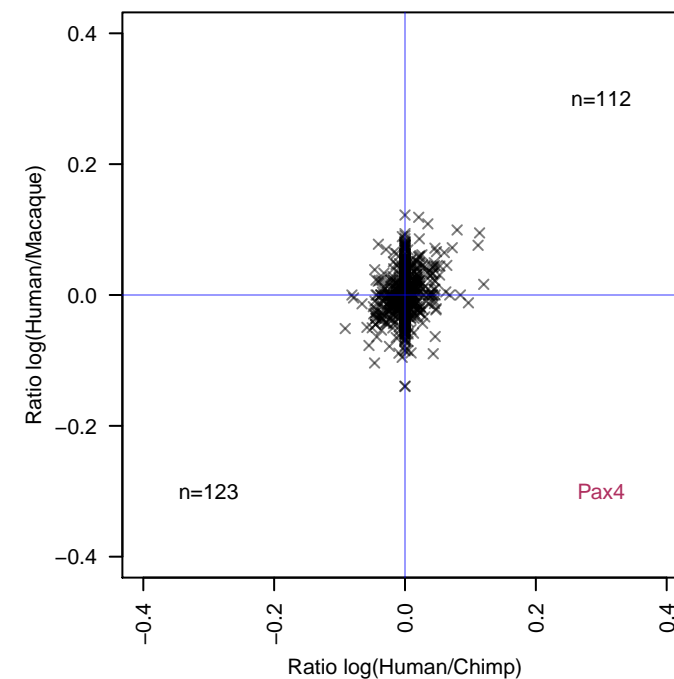

ChimpUpFibroblast.final.bed

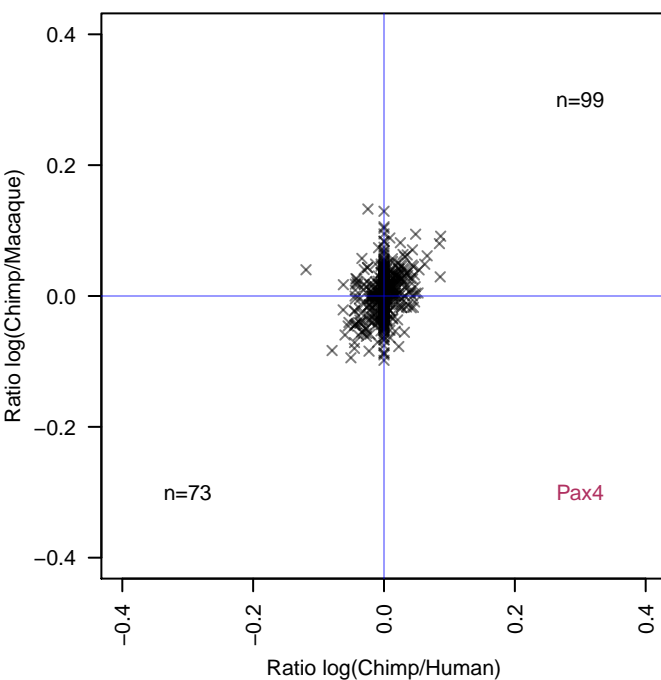

ChimpDownFibroblast.final.bed

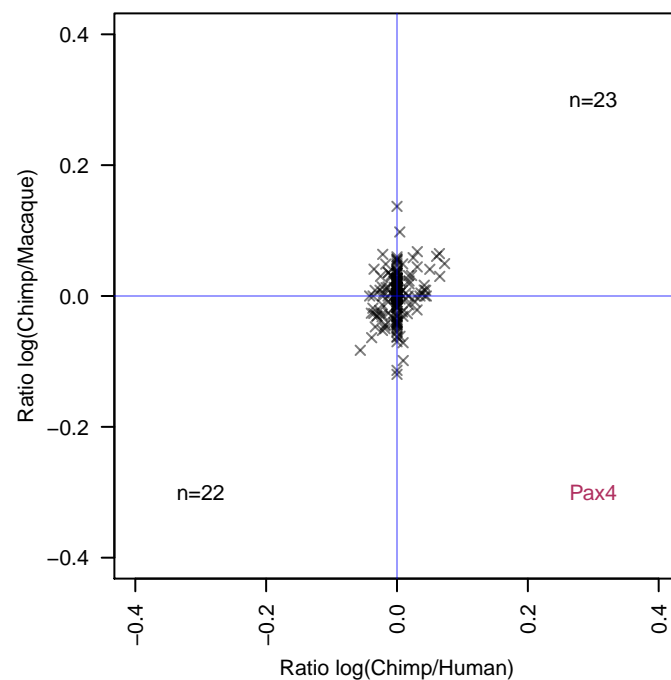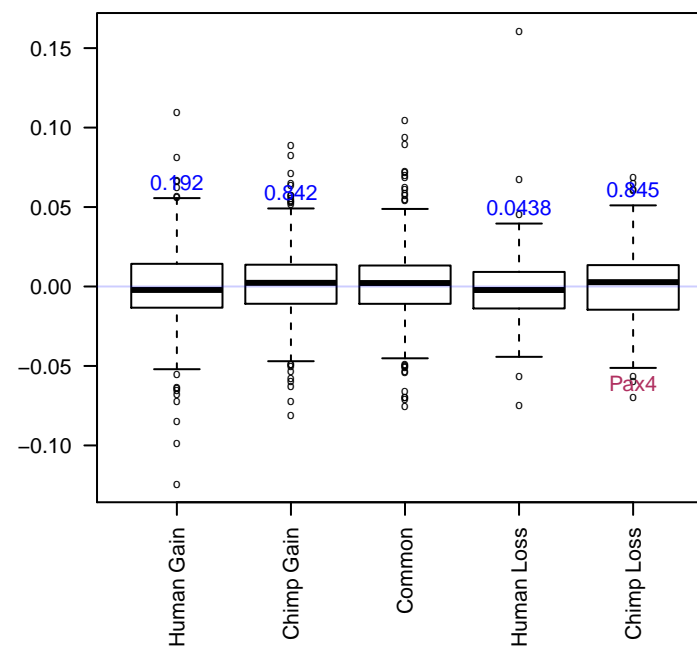

41

HumanUpFibroblast.final.bed

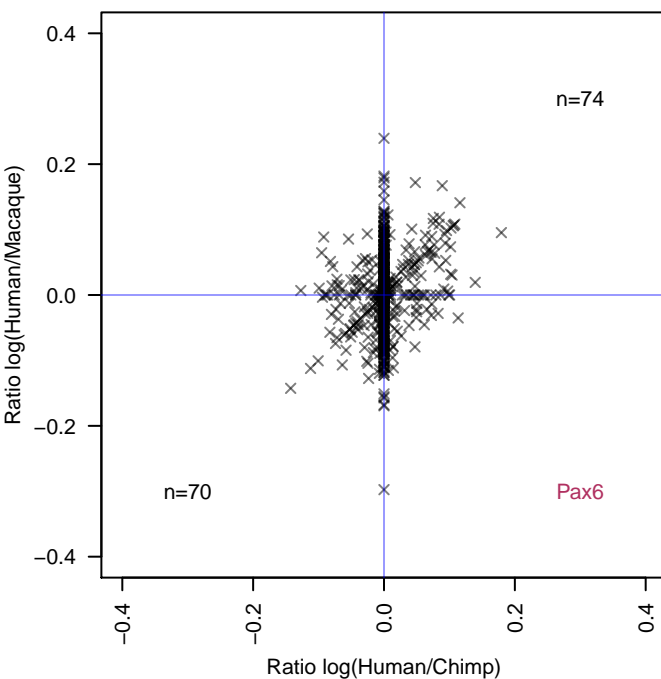

HumanDownFibroblast.final.bed

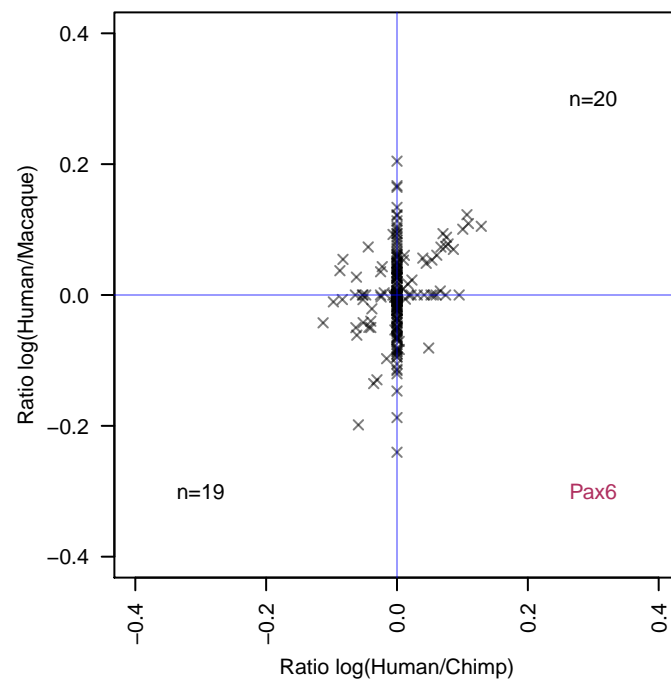

commonFibroblast.final.bed

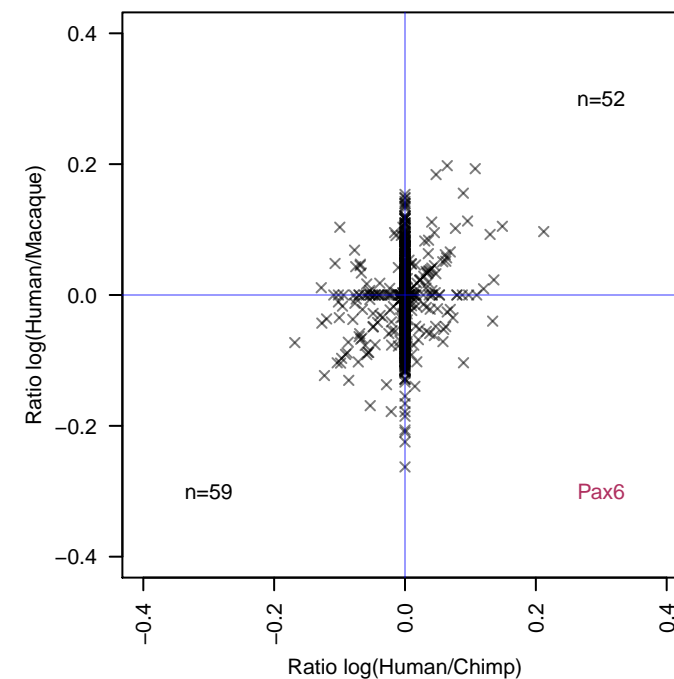

ChimpUpFibroblast.final.bed

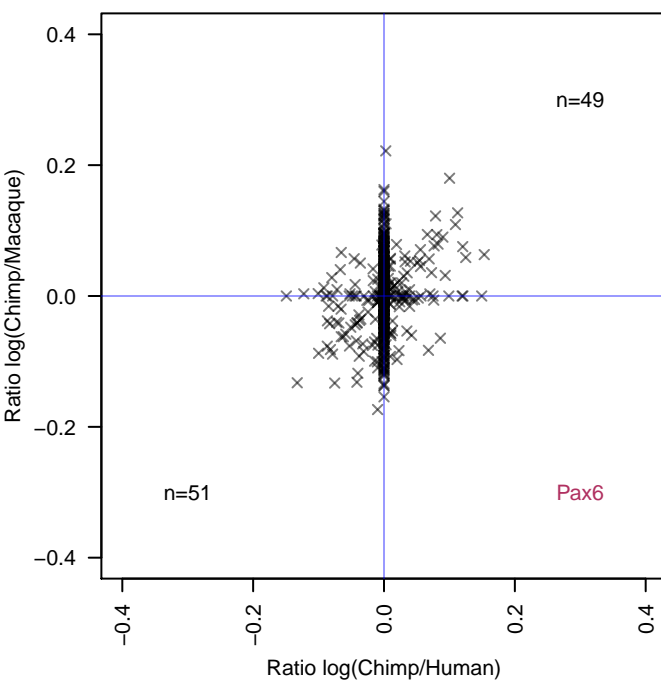

ChimpDownFibroblast.final.bed

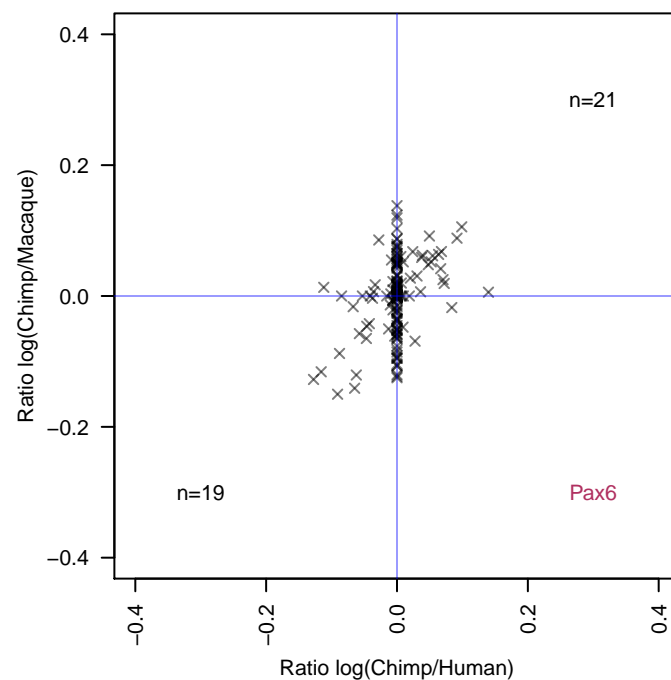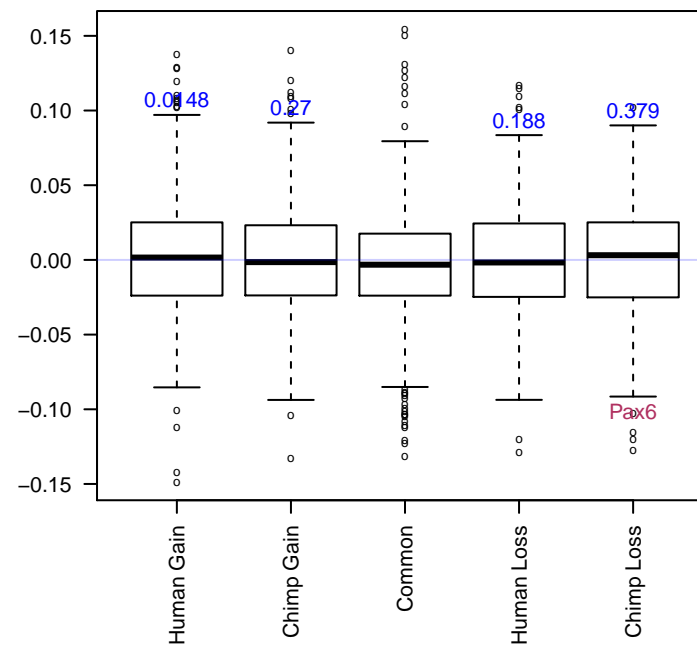

42

HumanUpFibroblast.final.bed

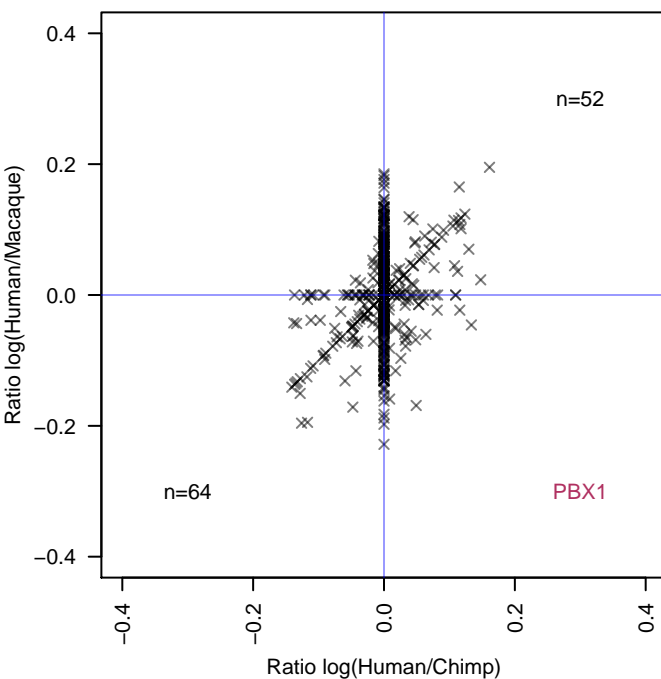

HumanDownFibroblast.final.bed

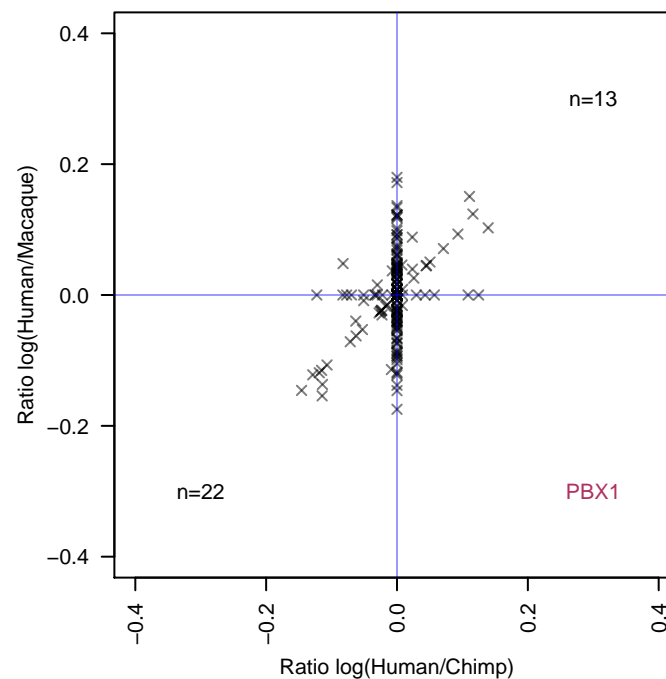

commonFibroblast.final.bed

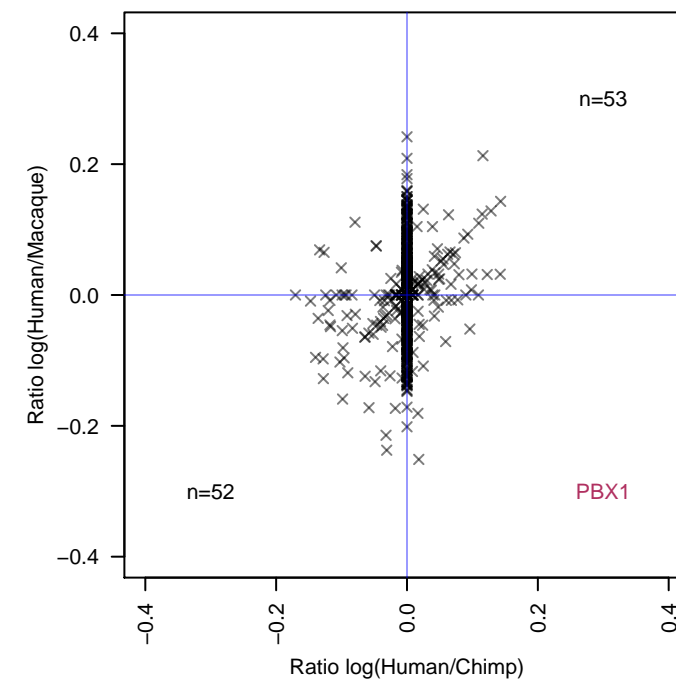

ChimpUpFibroblast.final.bed

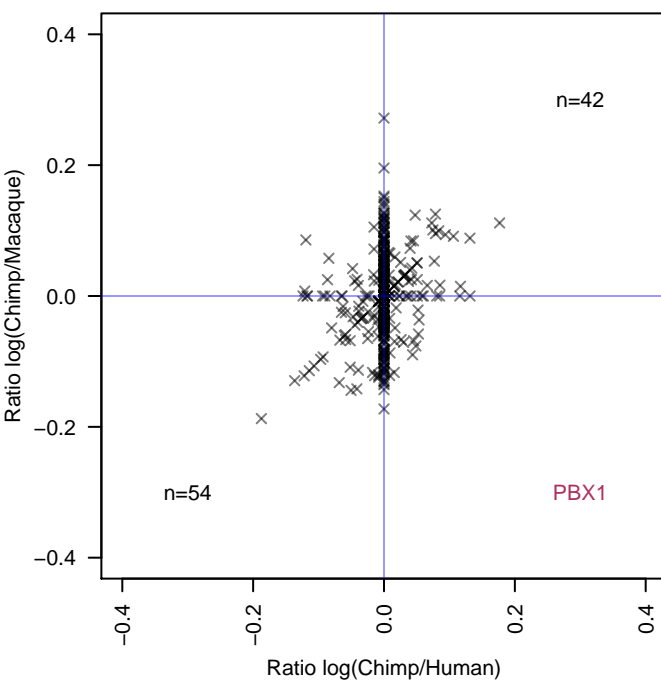

ChimpDownFibroblast.final.bed

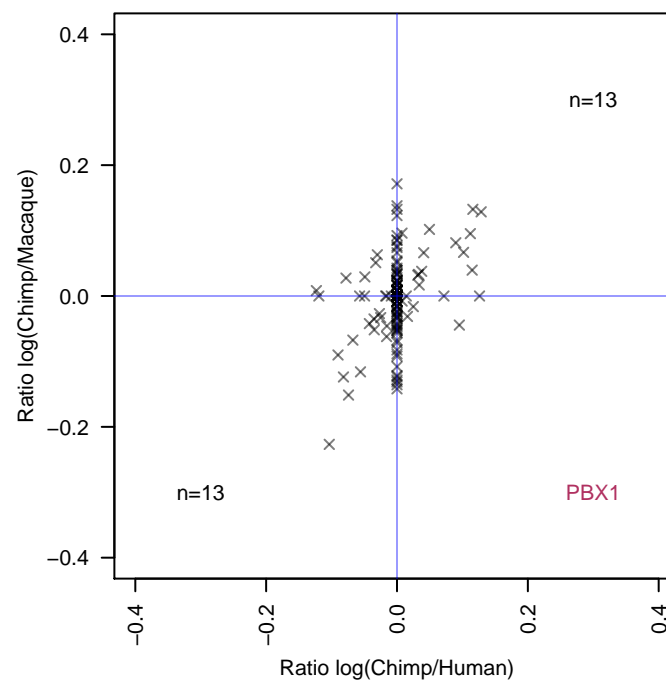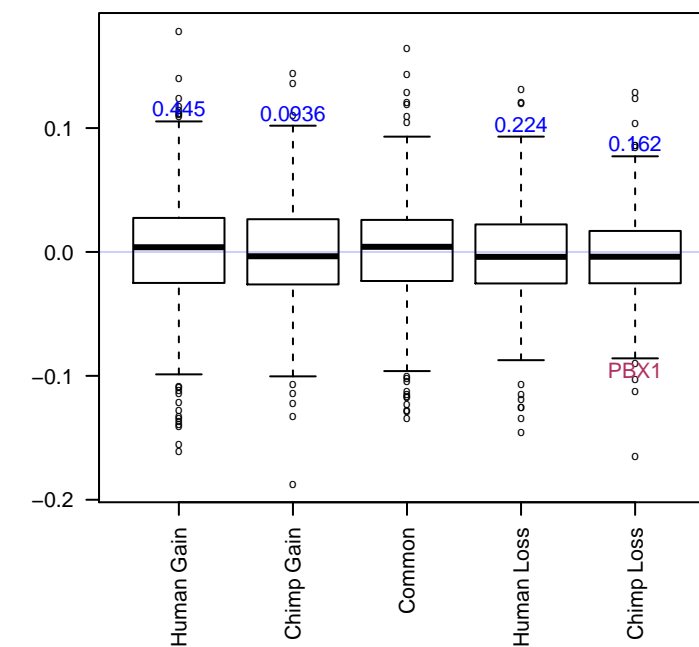

43

HumanUpFibroblast.final.bed

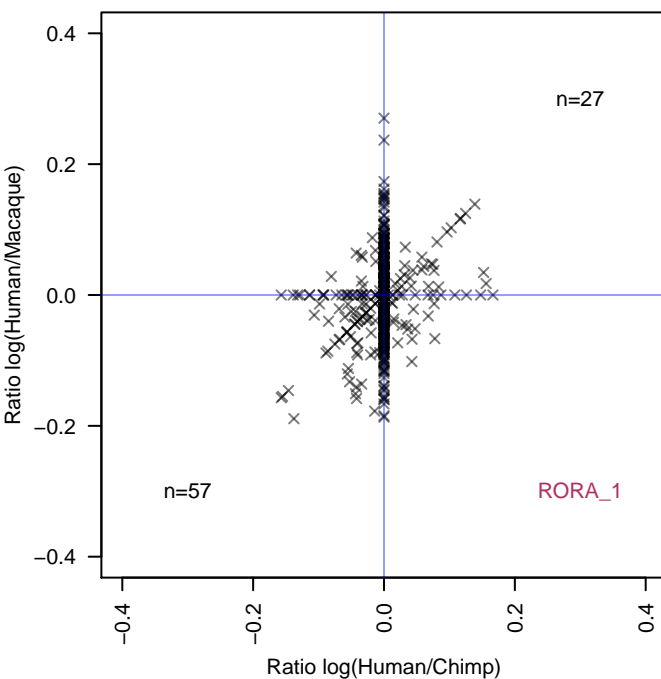

HumanDownFibroblast.final.bed

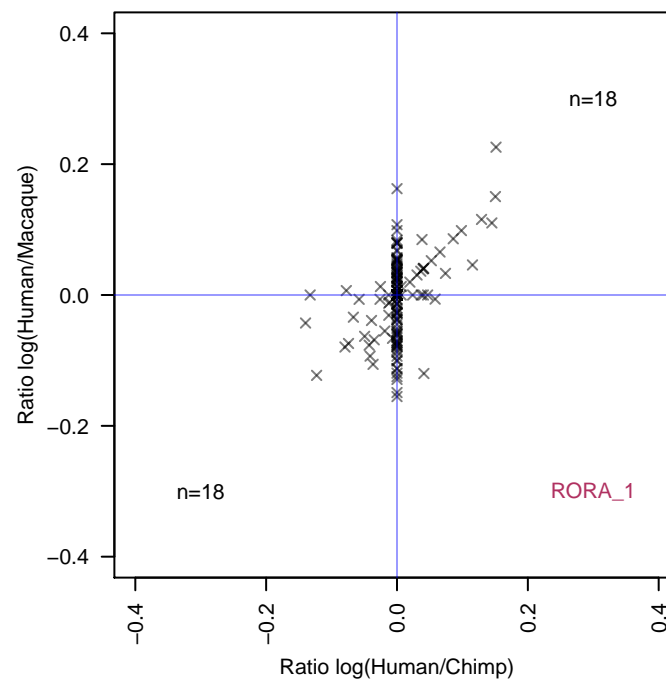

commonFibroblast.final.bed

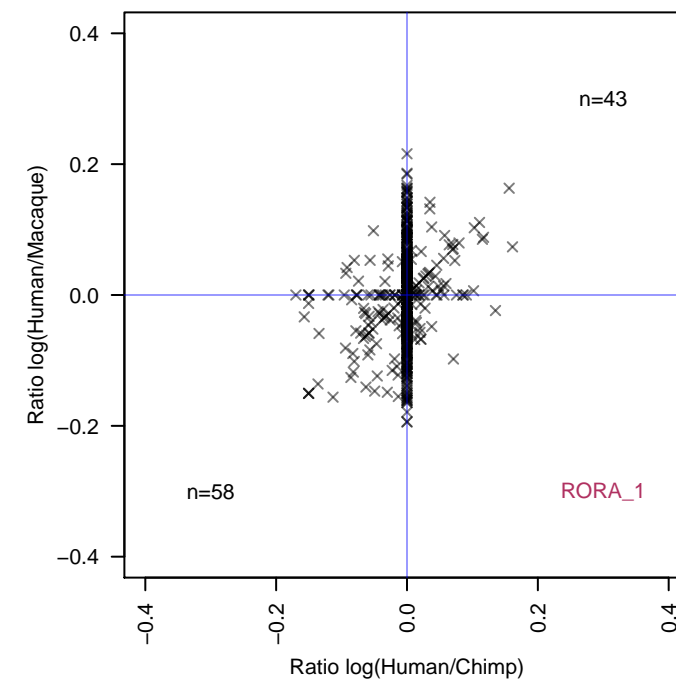

ChimpUpFibroblast.final.bed

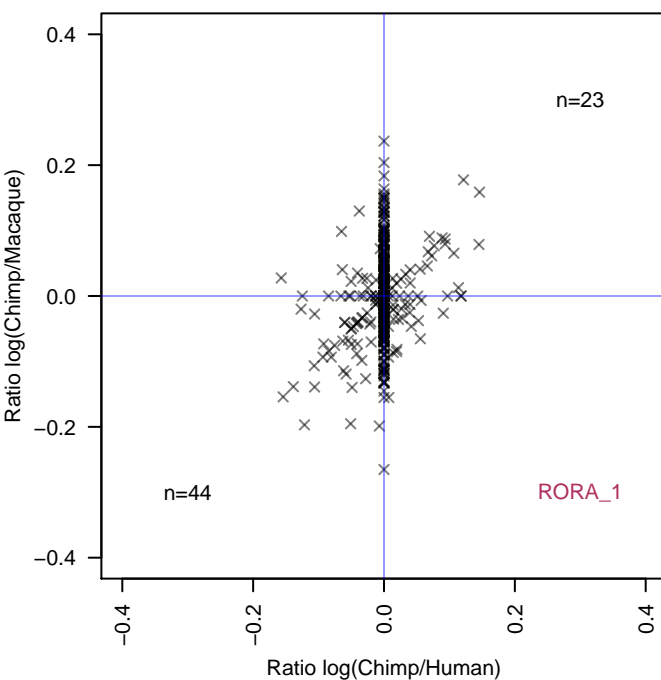

ChimpDownFibroblast.final.bed

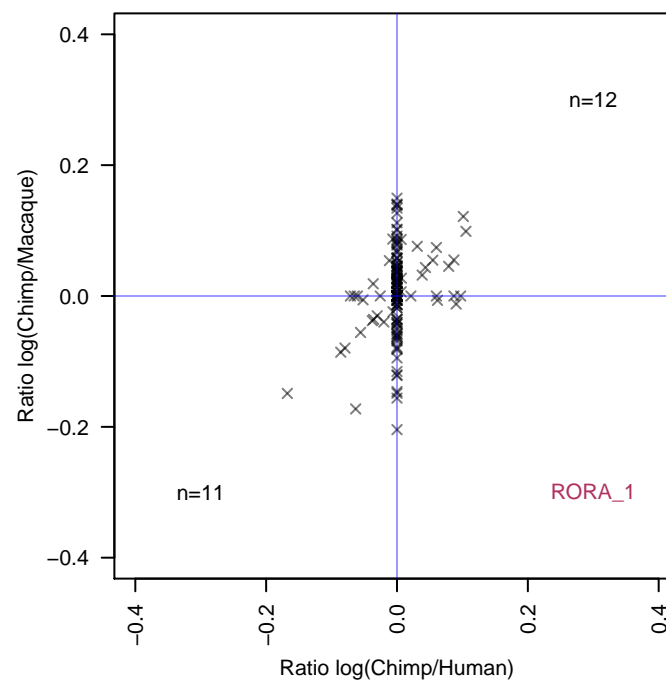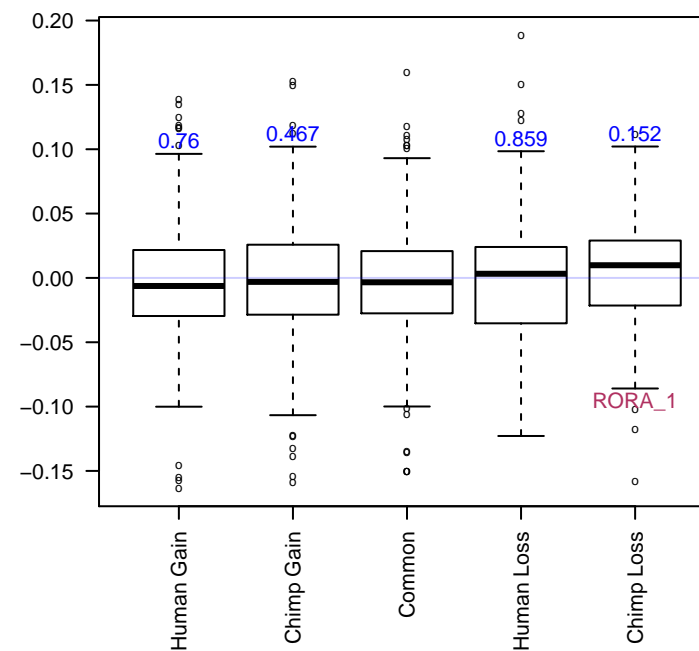

44

HumanUpFibroblast.final.bed

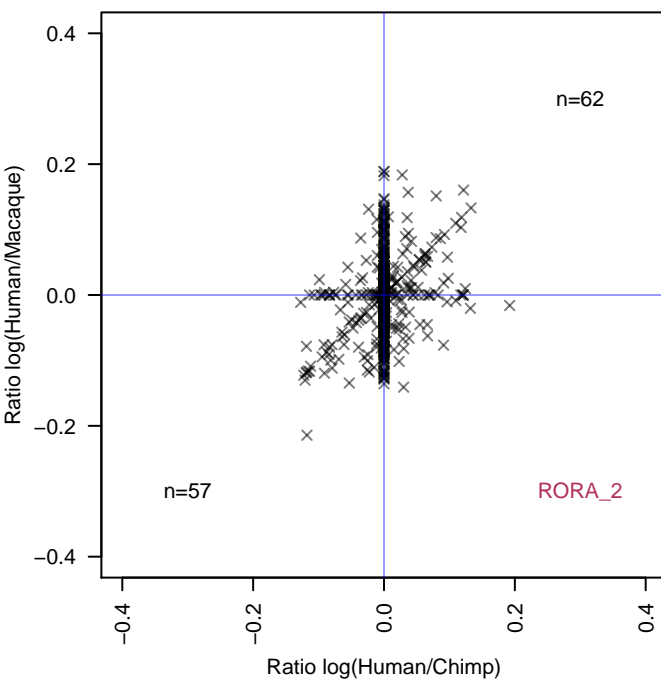

HumanDownFibroblast.final.bed

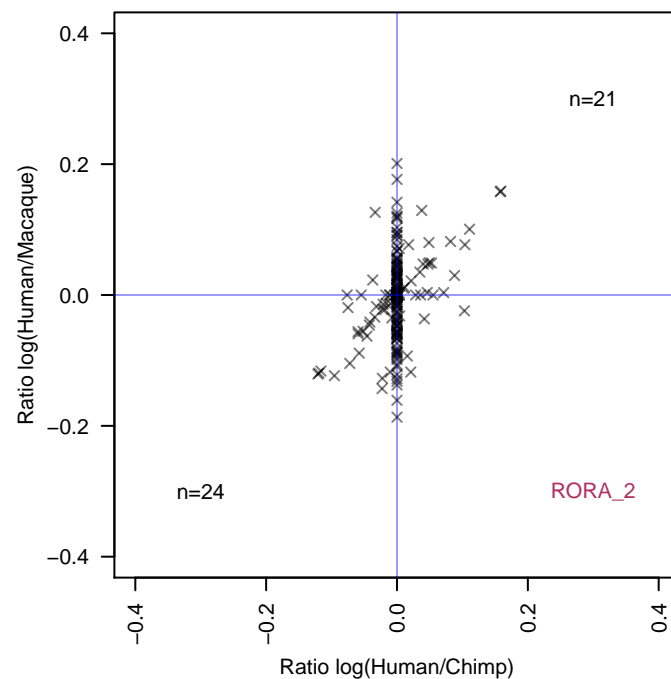

commonFibroblast.final.bed

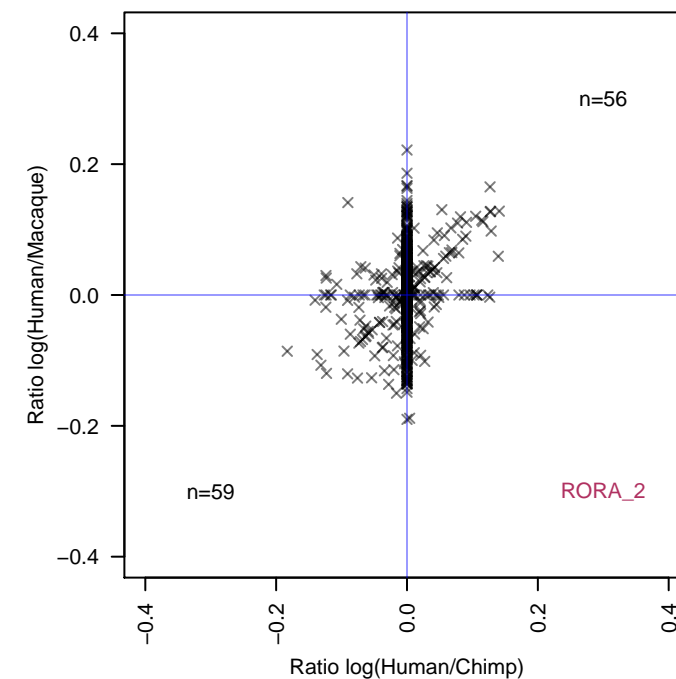

ChimpUpFibroblast.final.bed

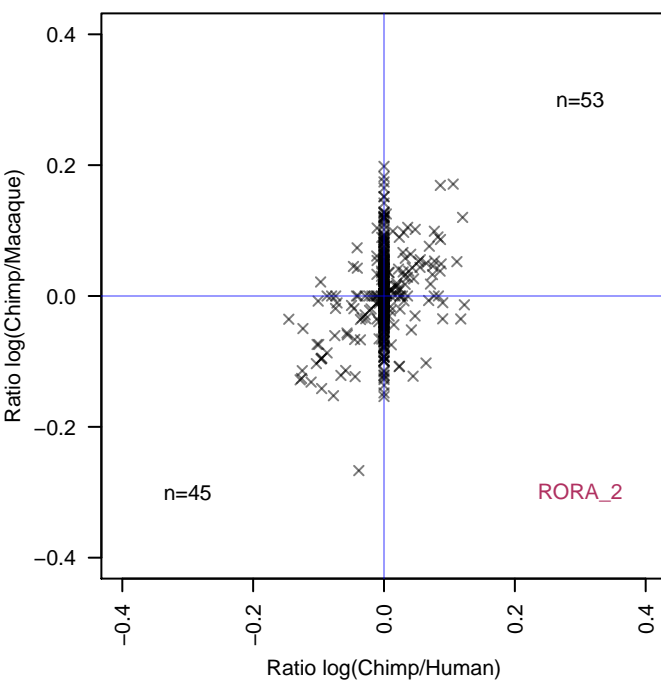

ChimpDownFibroblast.final.bed

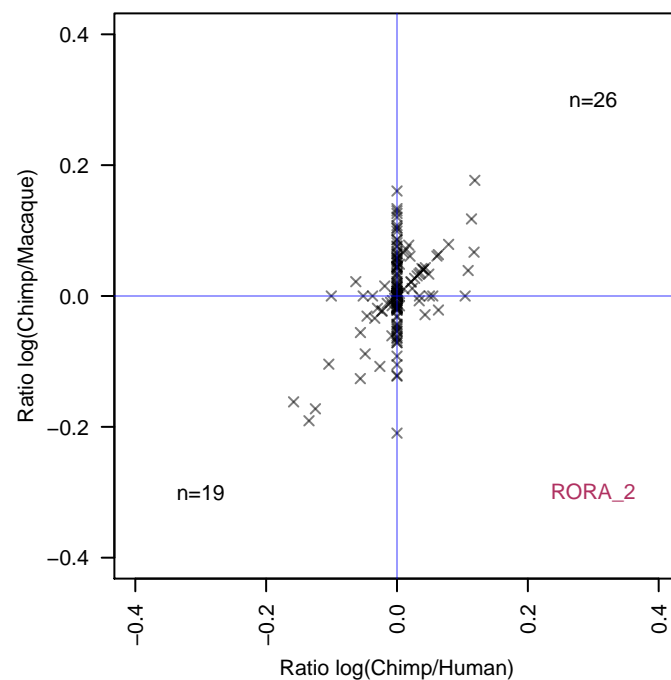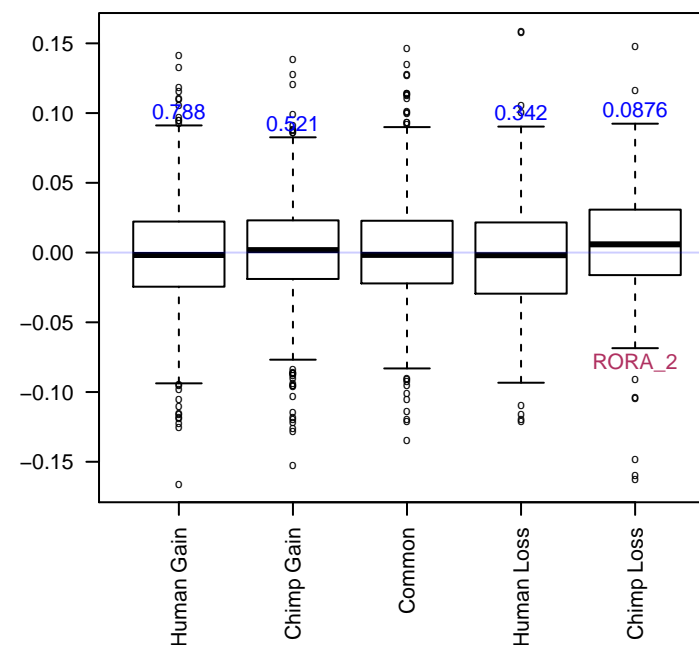

45

HumanUpFibroblast.final.bed

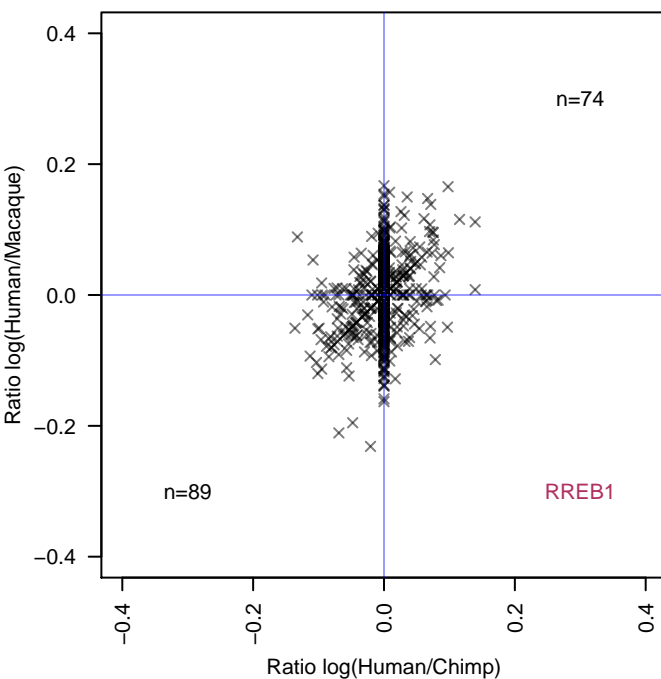

HumanDownFibroblast.final.bed

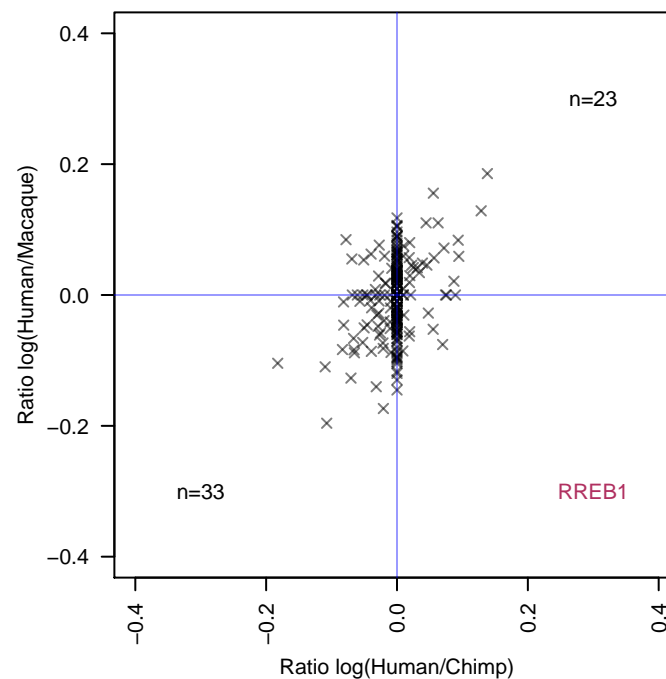

commonFibroblast.final.bed

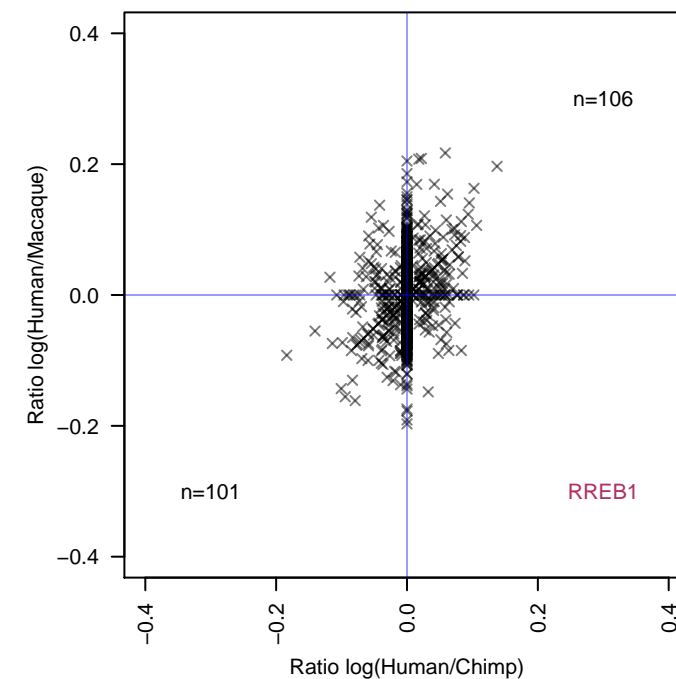

ChimpUpFibroblast.final.bed

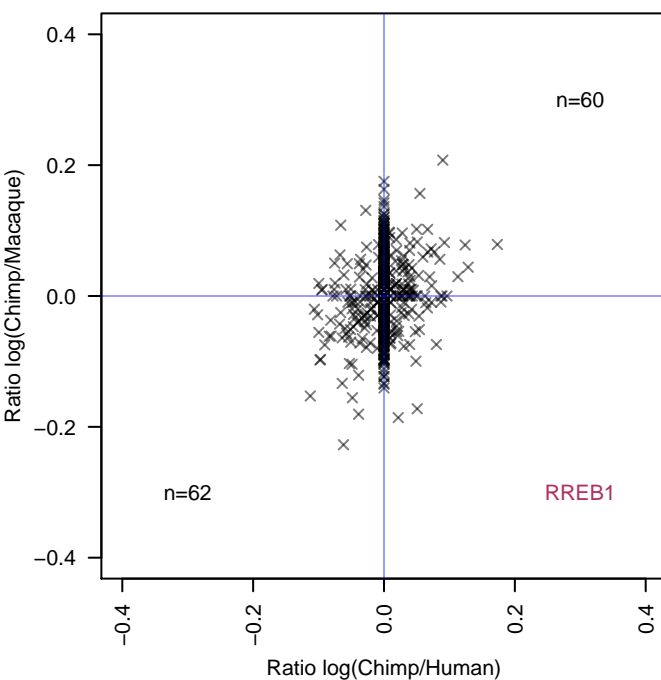

ChimpDownFibroblast.final.bed

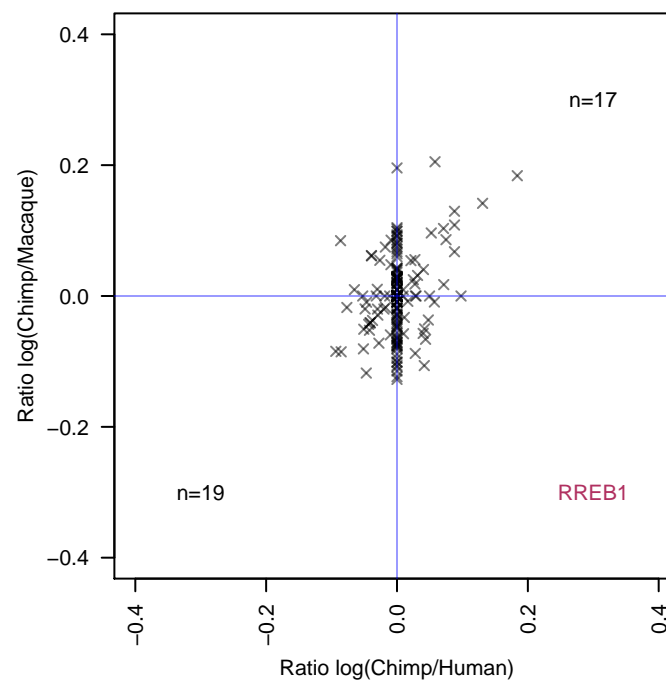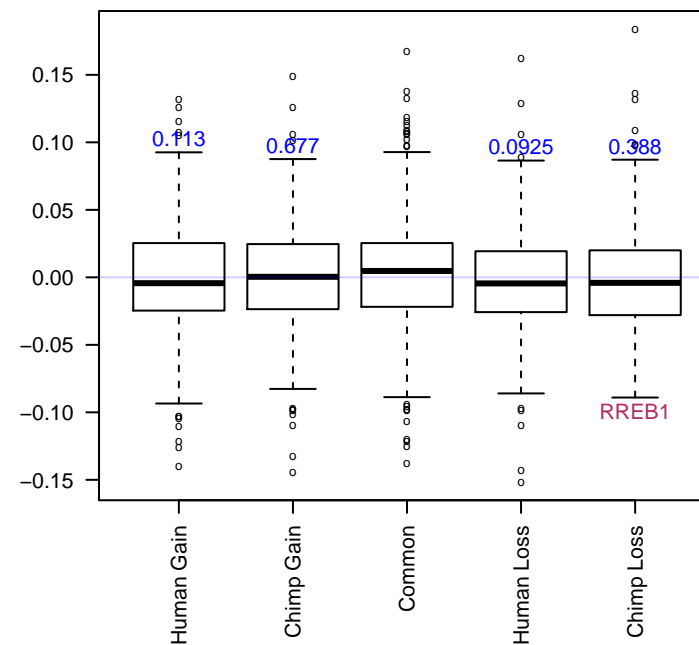

46

HumanUpFibroblast.final.bed

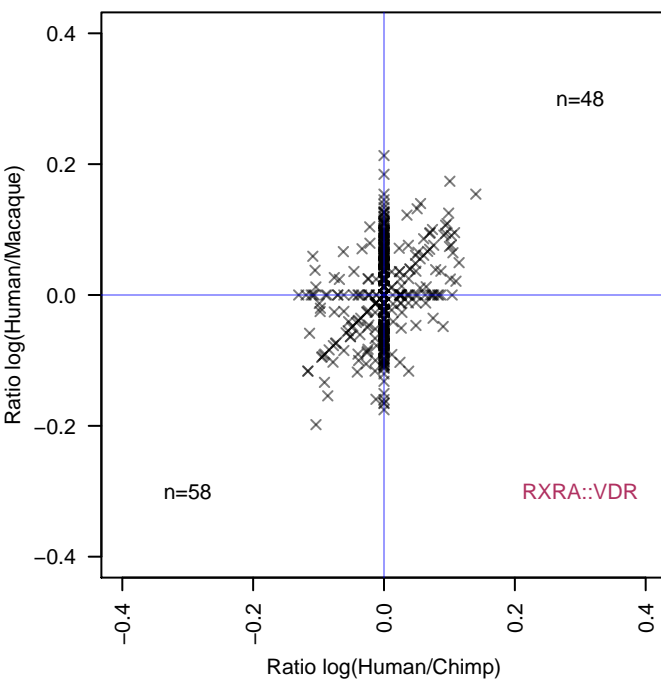

HumanDownFibroblast.final.bed

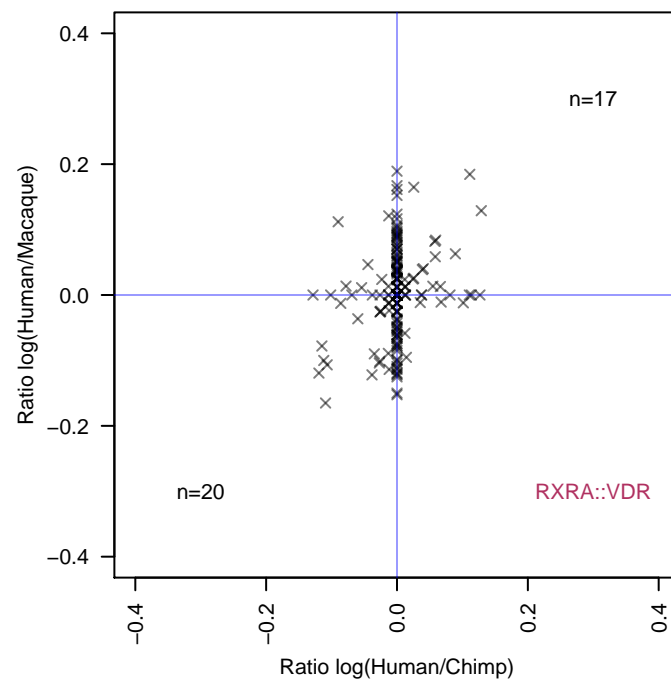

commonFibroblast.final.bed

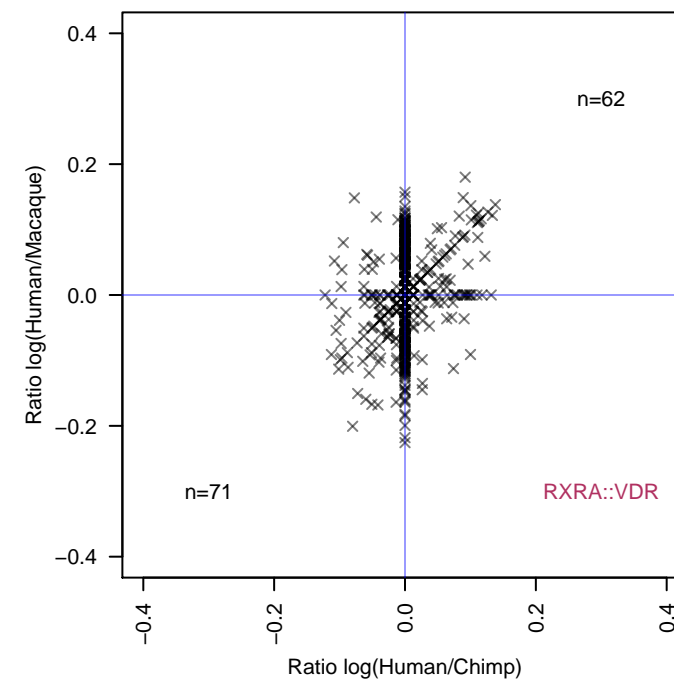

ChimpUpFibroblast.final.bed

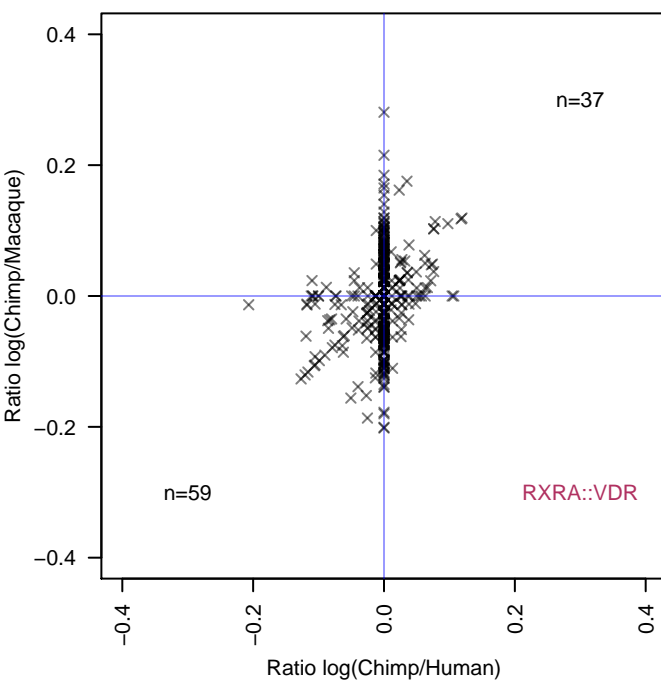

ChimpDownFibroblast.final.bed

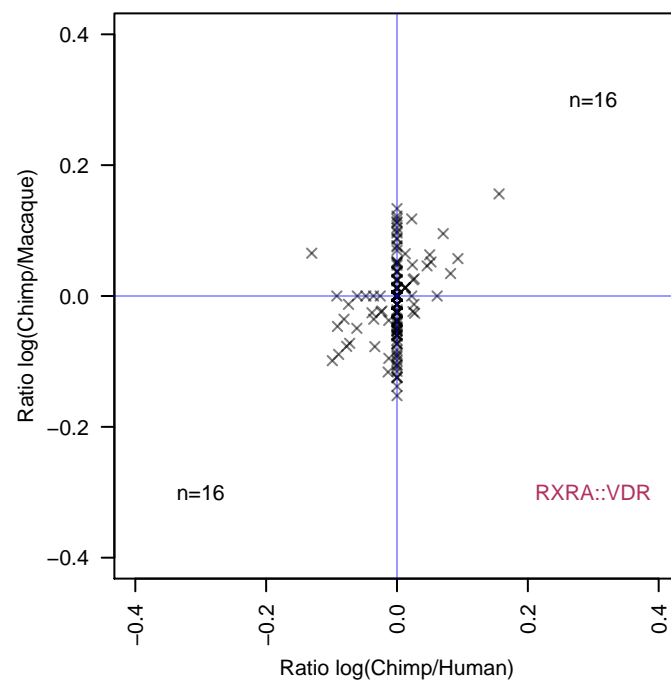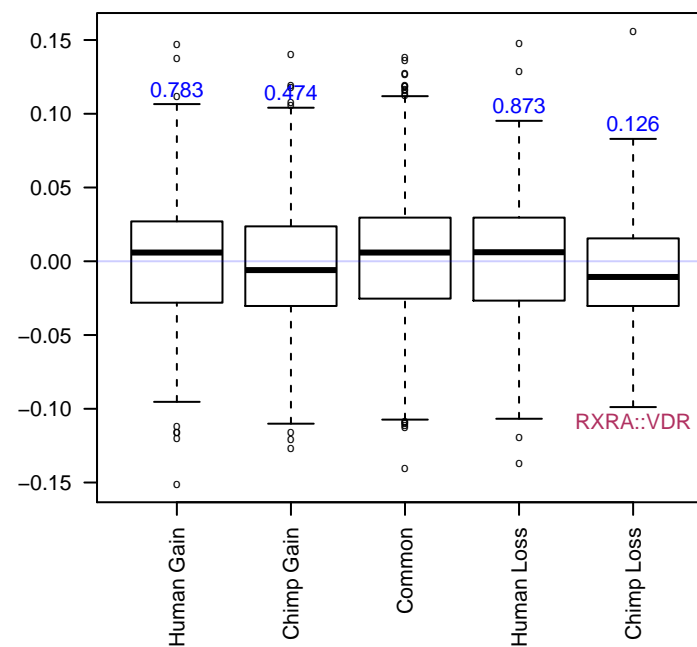

47

HumanUpFibroblast.final.bed

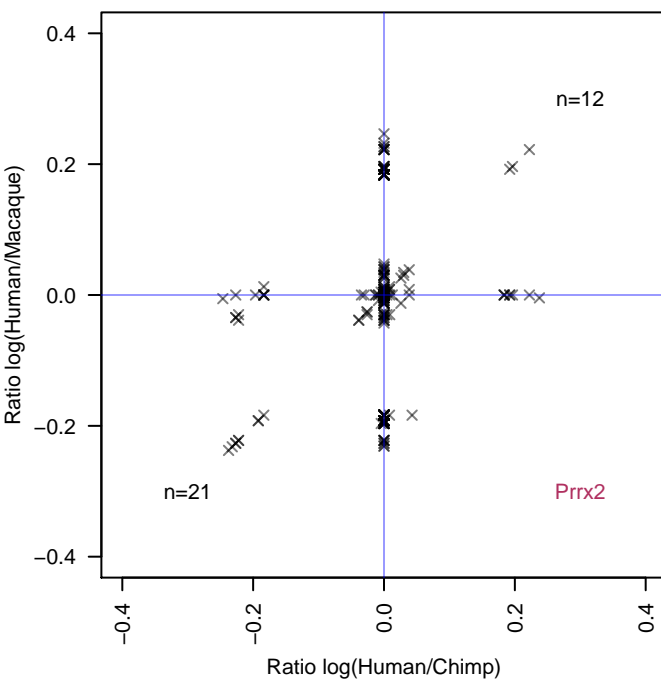

HumanDownFibroblast.final.bed

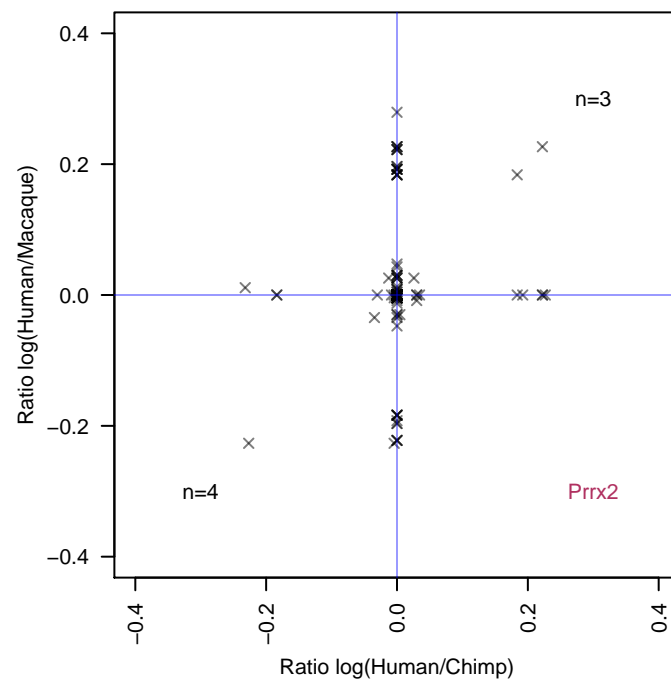

commonFibroblast.final.bed

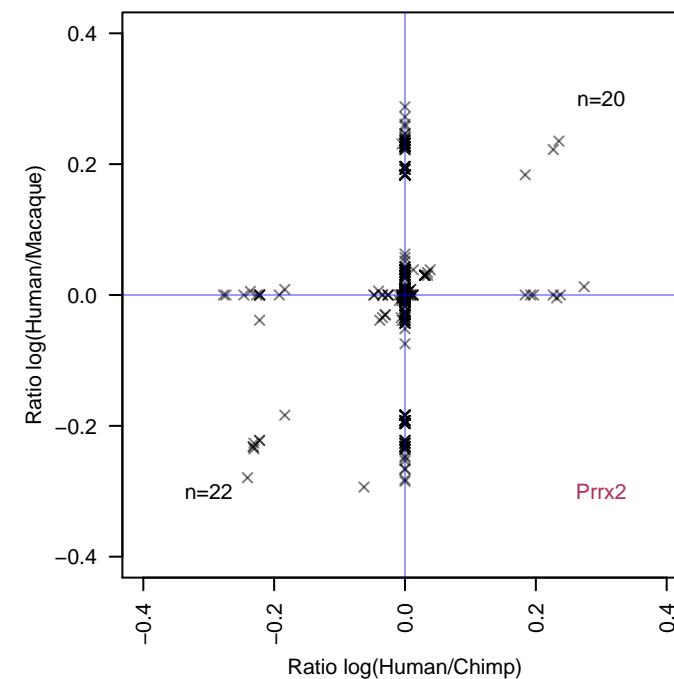

ChimpUpFibroblast.final.bed

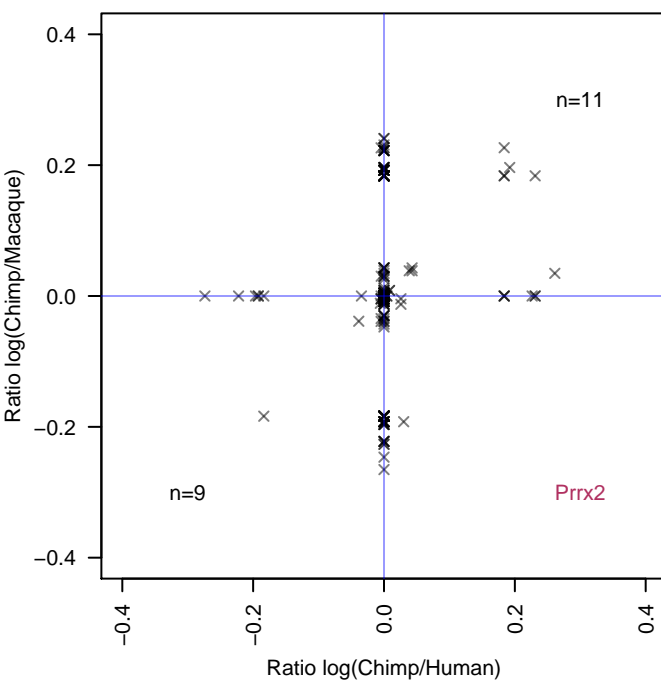

ChimpDownFibroblast.final.bed

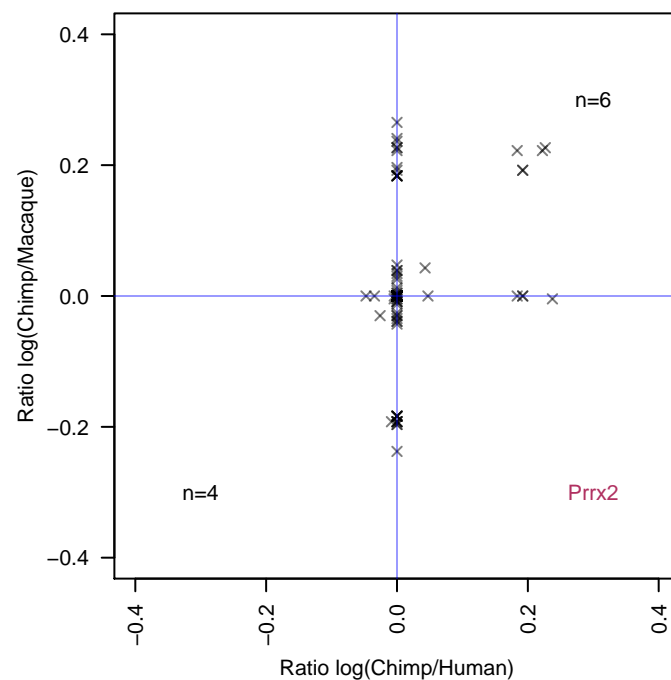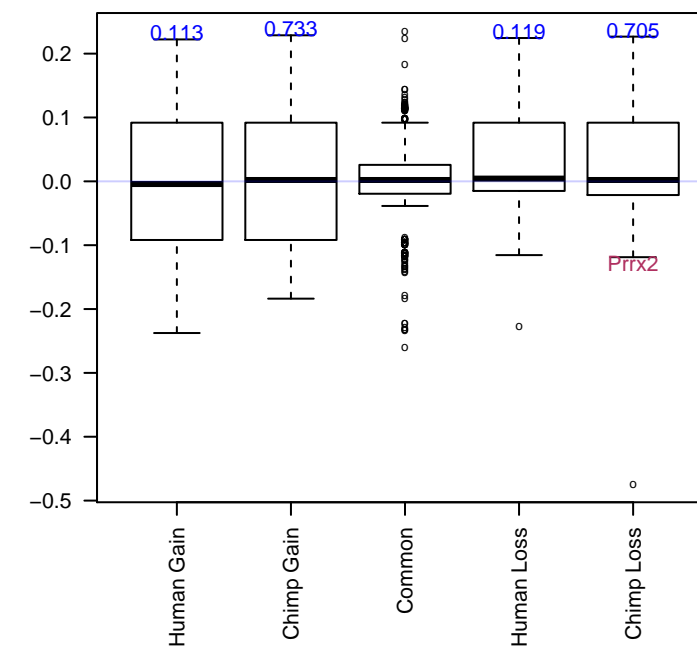

48

HumanUpFibroblast.final.bed

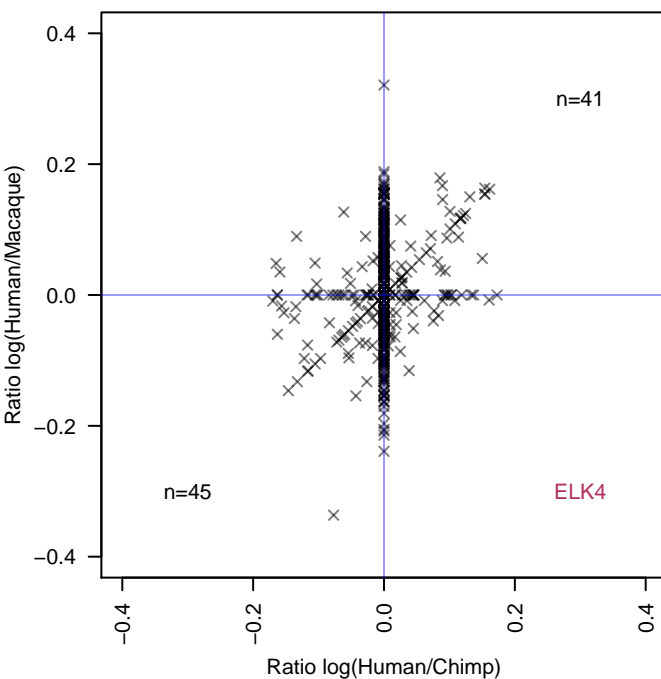

HumanDownFibroblast.final.bed

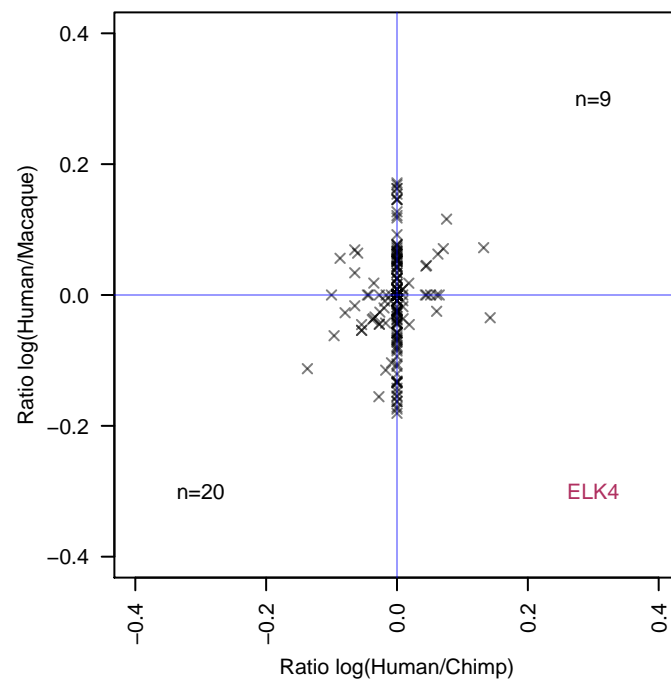

commonFibroblast.final.bed

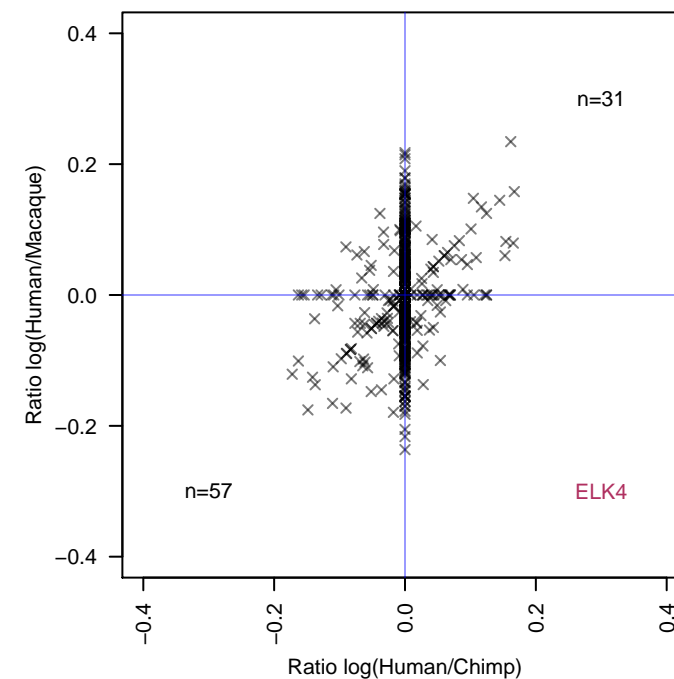

ChimpUpFibroblast.final.bed

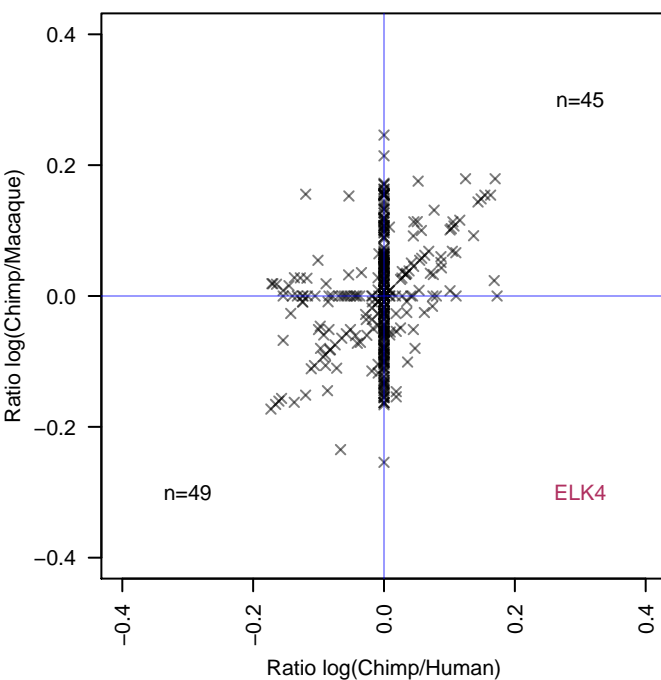

ChimpDownFibroblast.final.bed

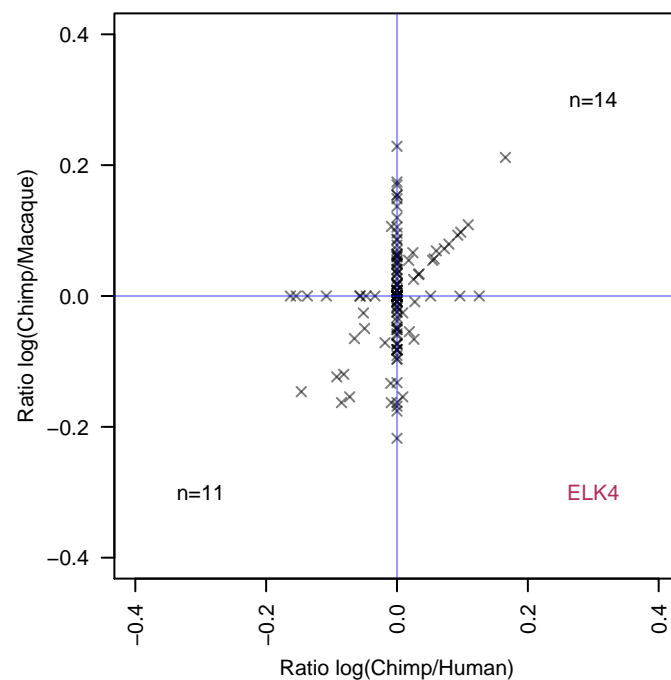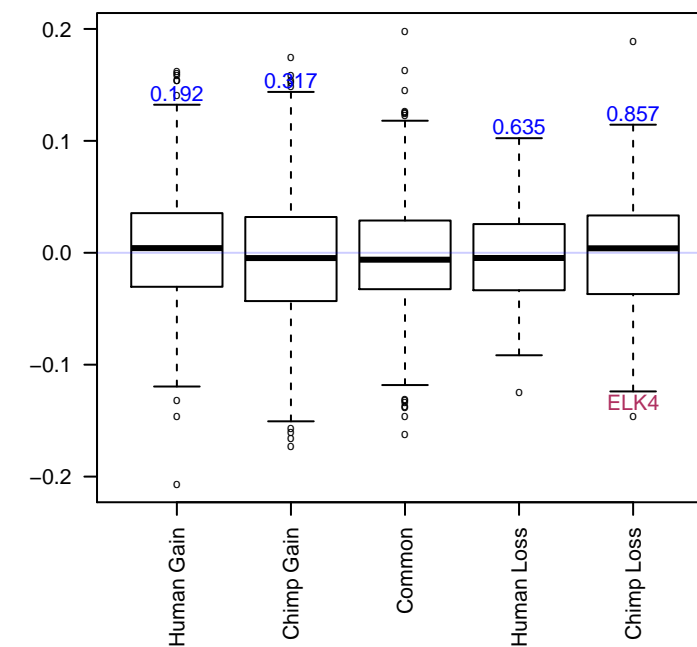

49

HumanUpFibroblast.final.bed

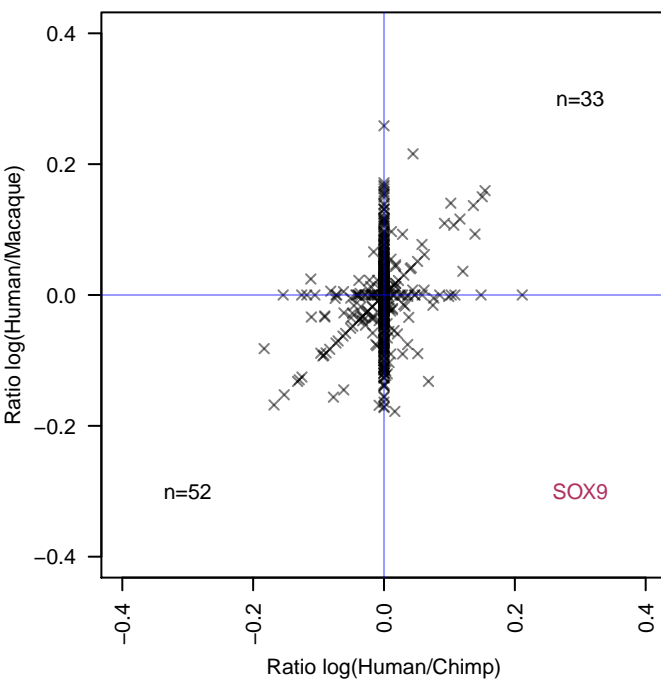

HumanDownFibroblast.final.bed

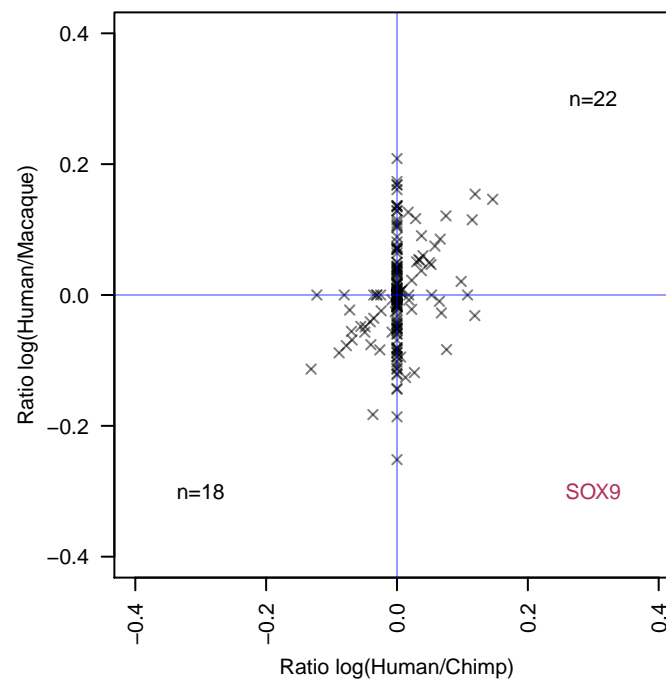

commonFibroblast.final.bed

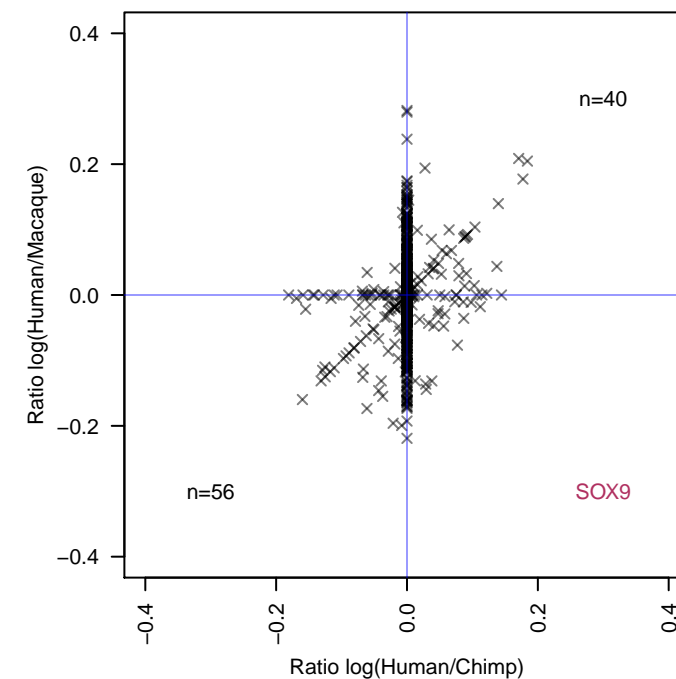

ChimpUpFibroblast.final.bed

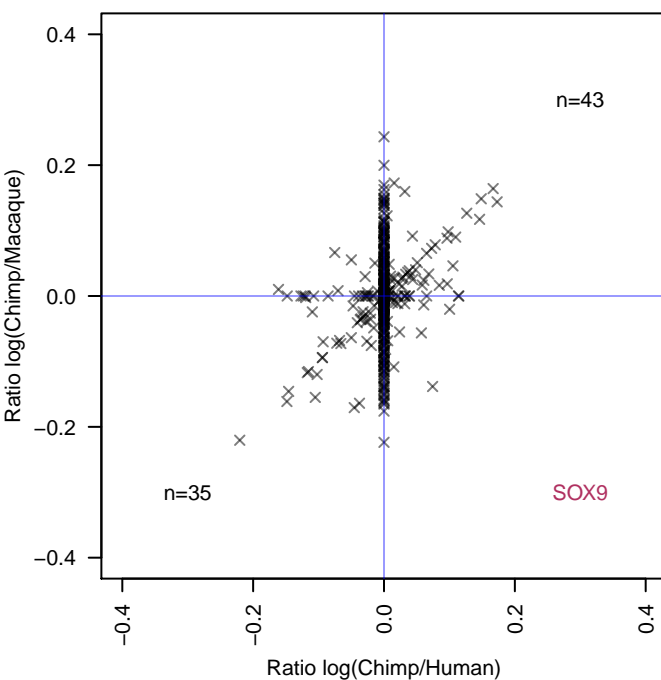

ChimpDownFibroblast.final.bed

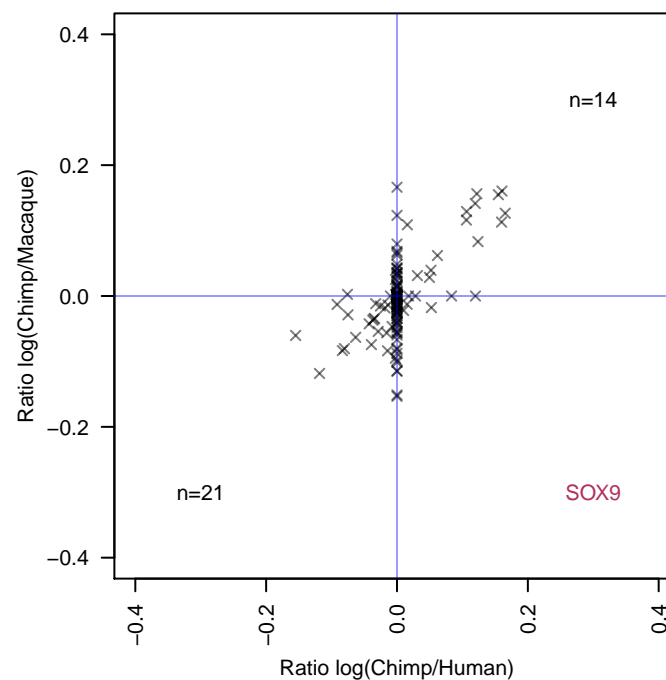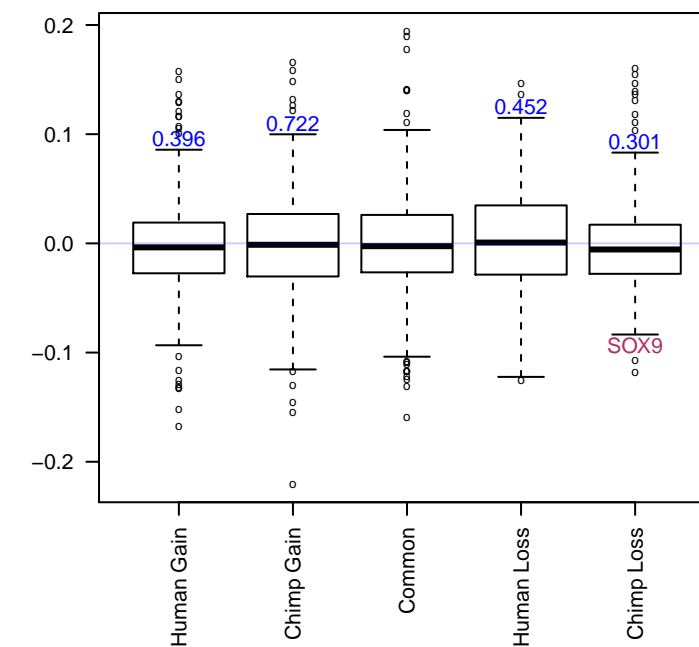

50

HumanUpFibroblast.final.bed

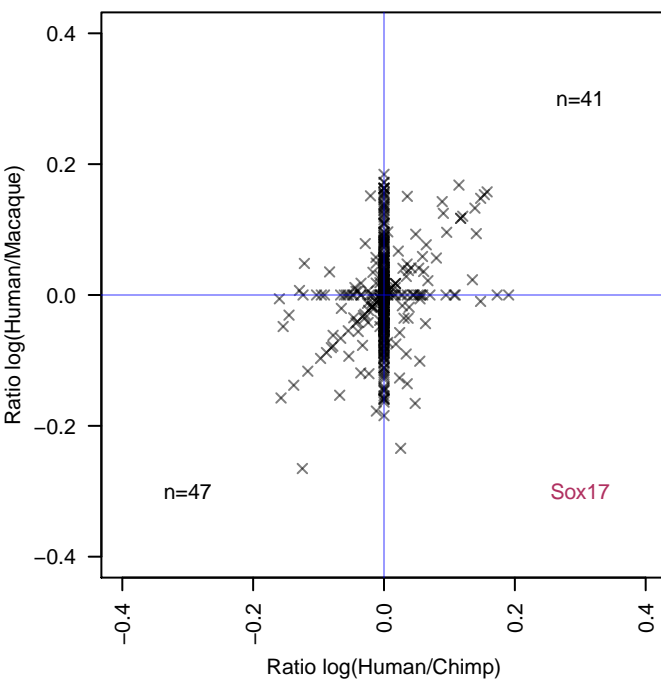

HumanDownFibroblast.final.bed

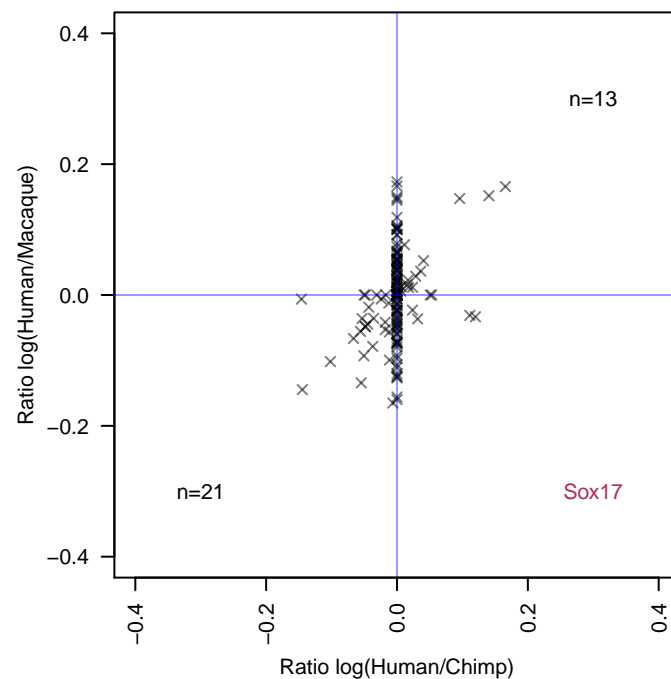

commonFibroblast.final.bed

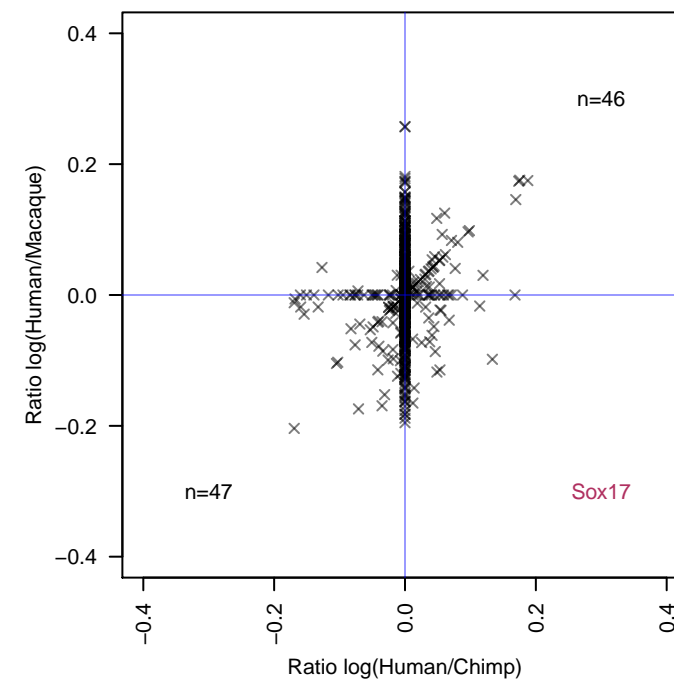

ChimpUpFibroblast.final.bed

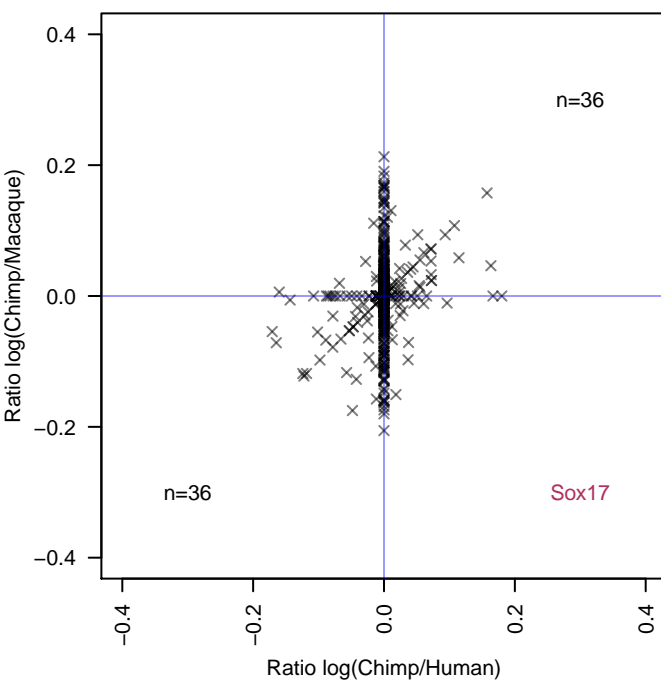

ChimpDownFibroblast.final.bed

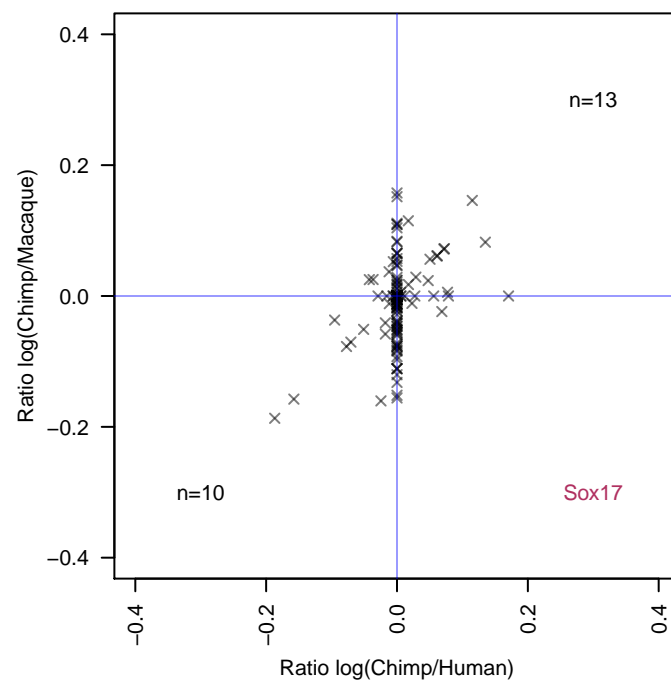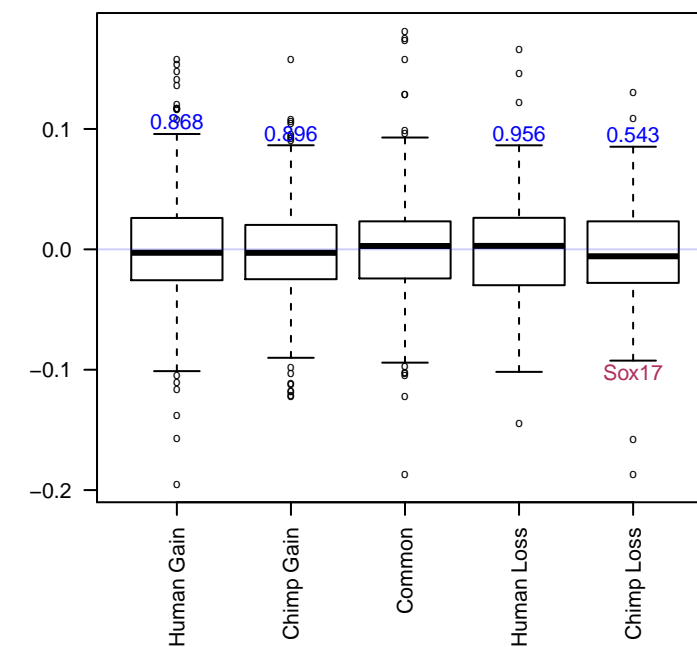

51

HumanUpFibroblast.final.bed

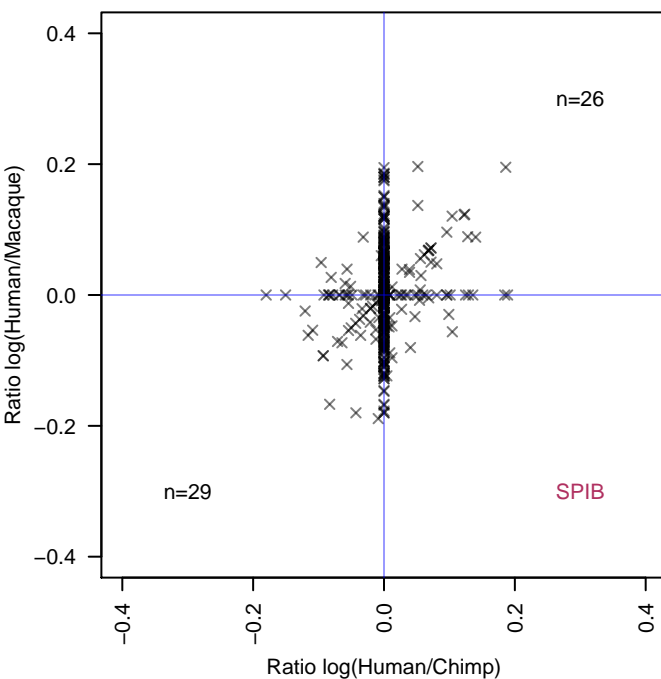

HumanDownFibroblast.final.bed

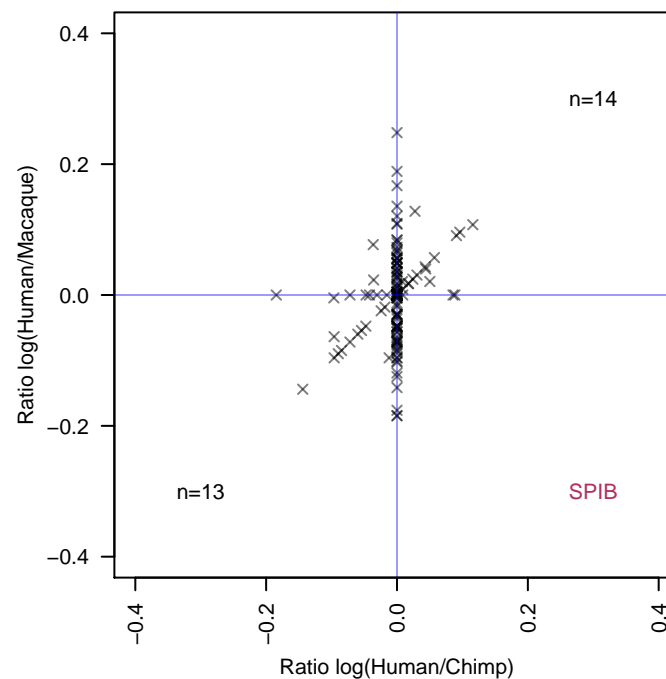

commonFibroblast.final.bed

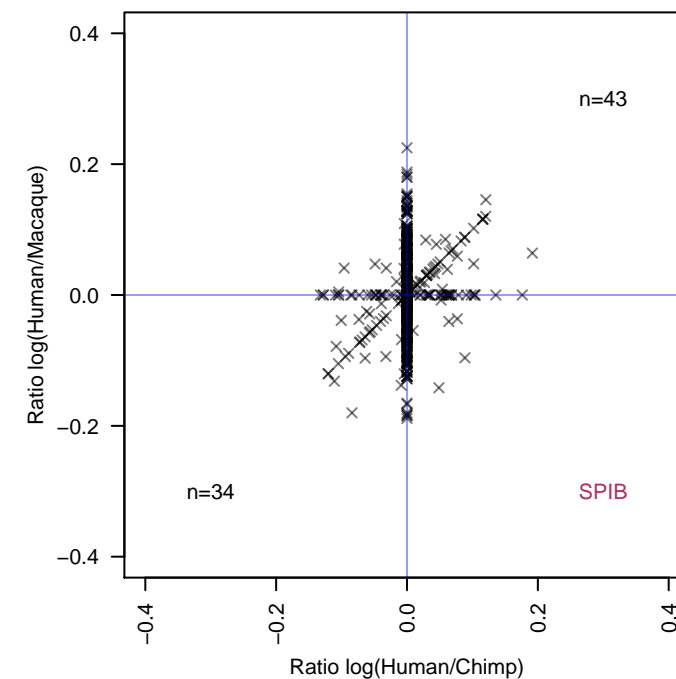

ChimpUpFibroblast.final.bed

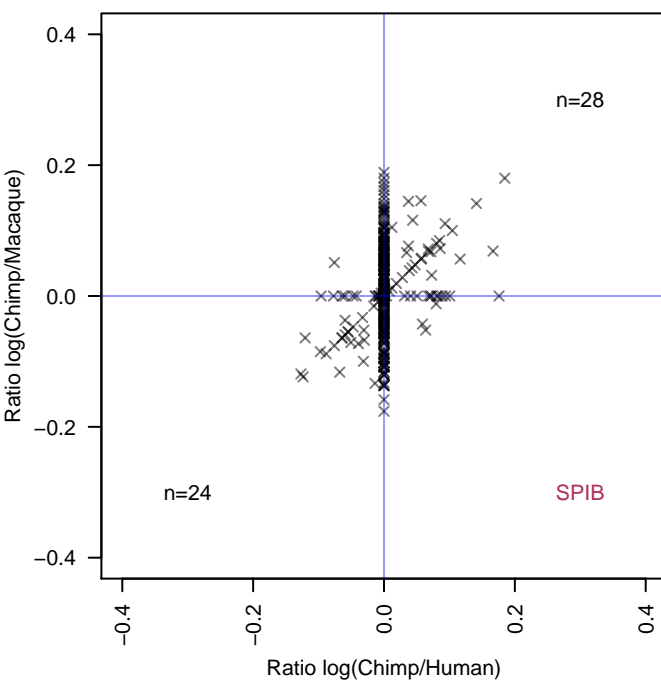

ChimpDownFibroblast.final.bed

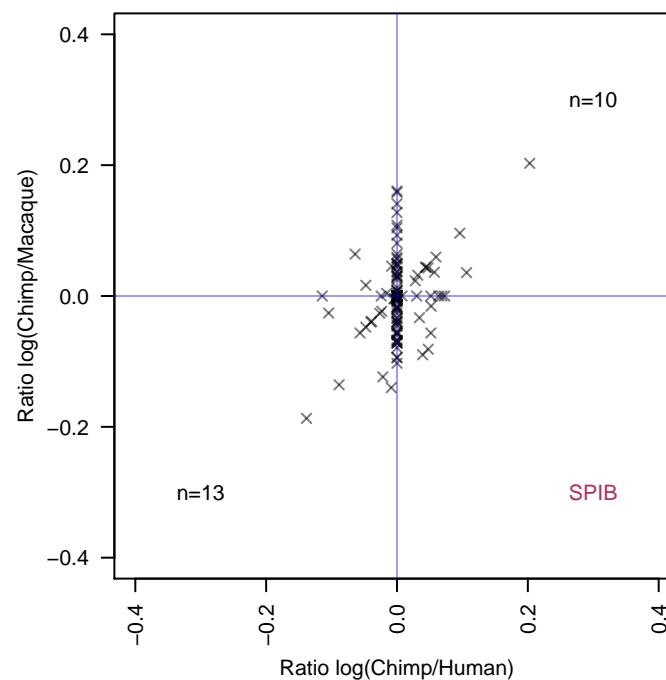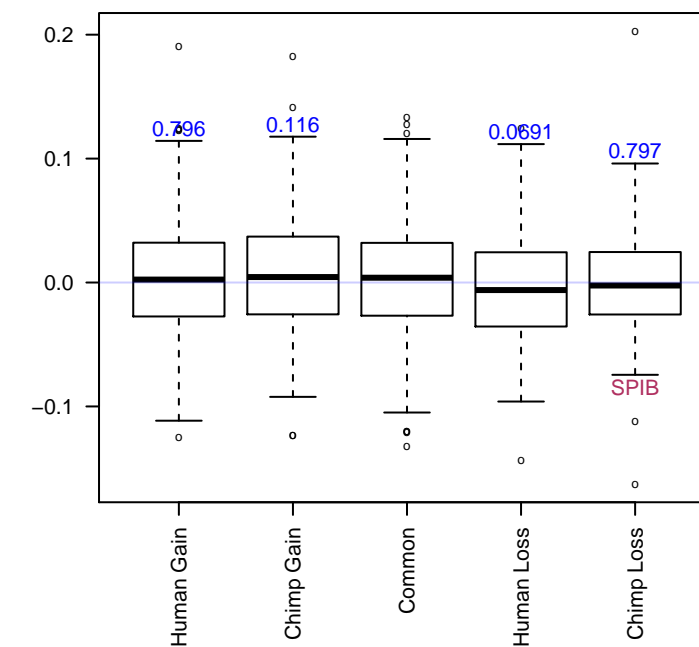

52

HumanUpFibroblast.final.bed

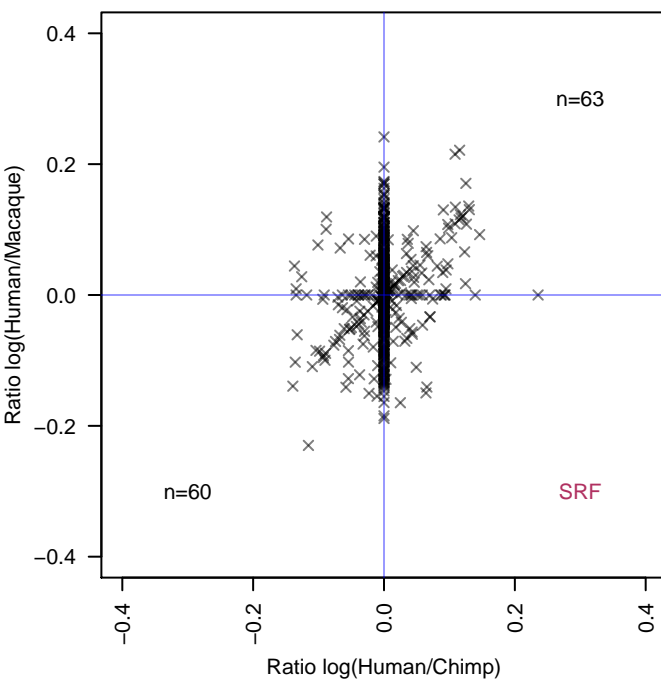

HumanDownFibroblast.final.bed

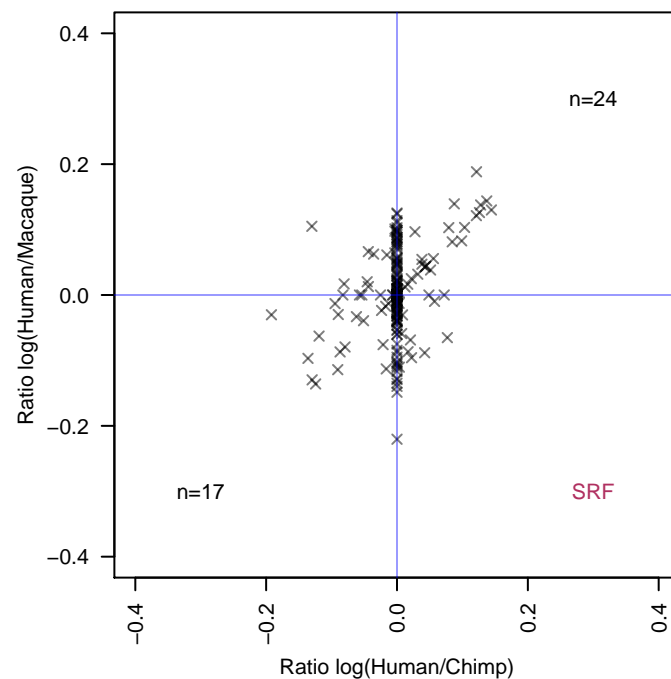

commonFibroblast.final.bed

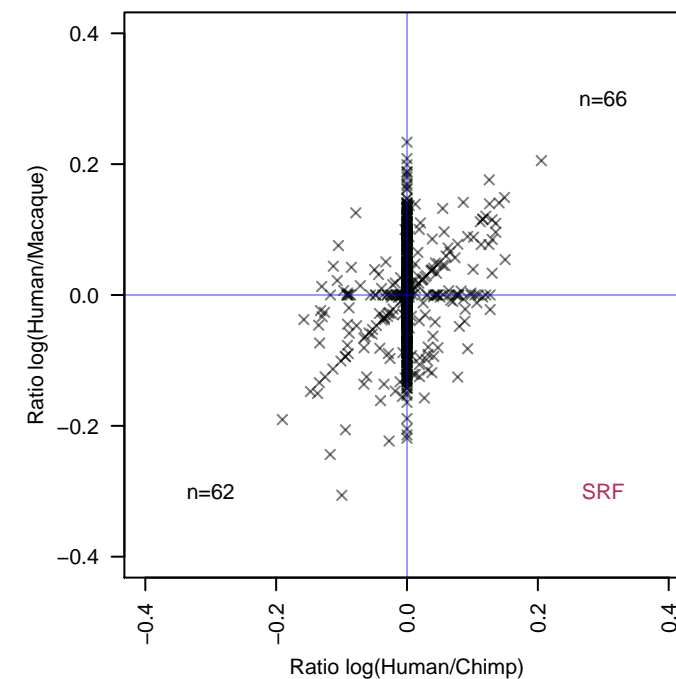

ChimpUpFibroblast.final.bed

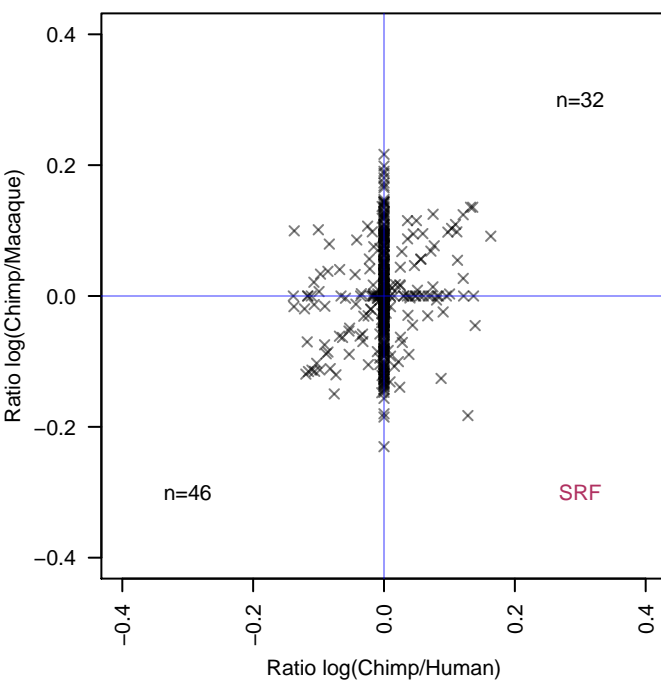

ChimpDownFibroblast.final.bed

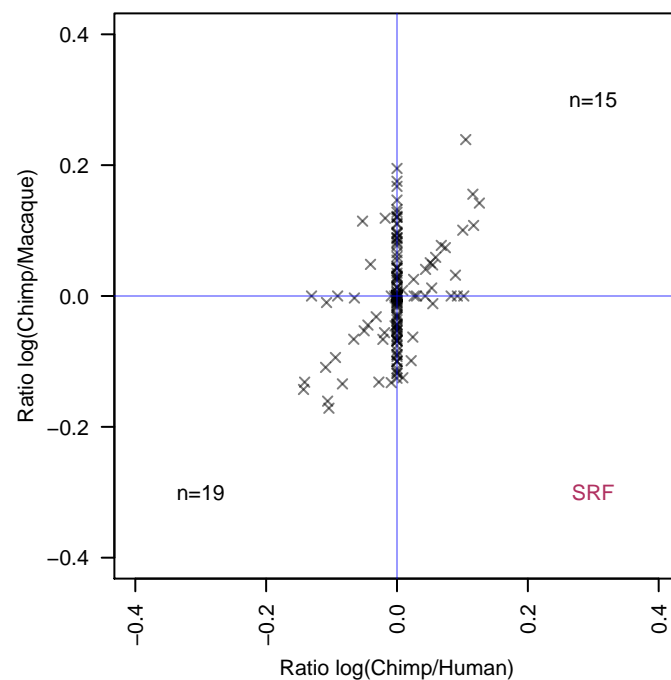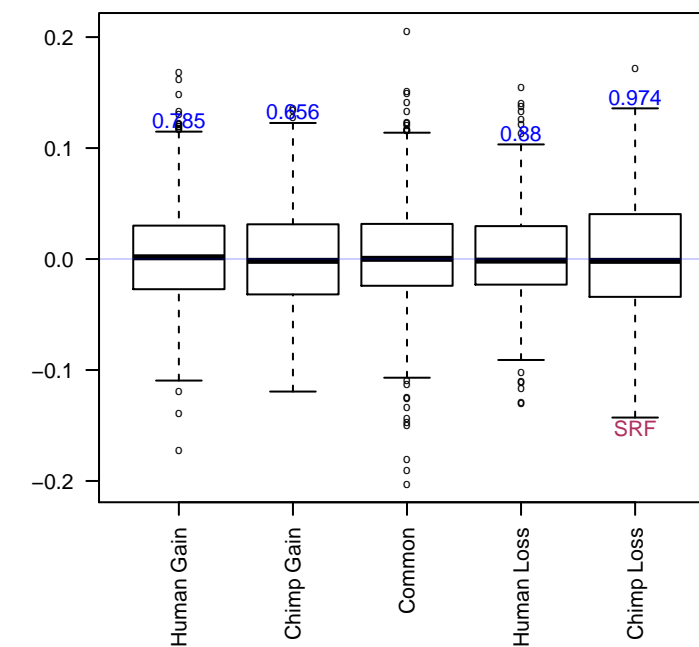

53

HumanUpFibroblast.final.bed

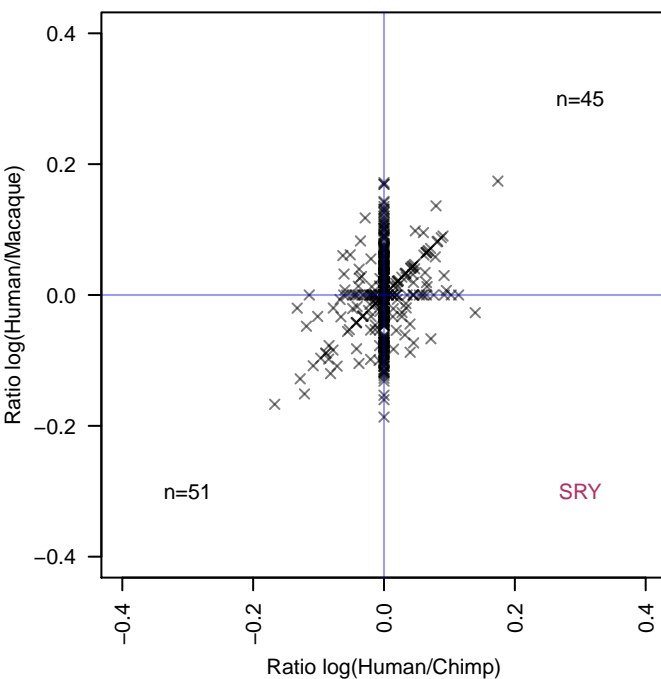

HumanDownFibroblast.final.bed

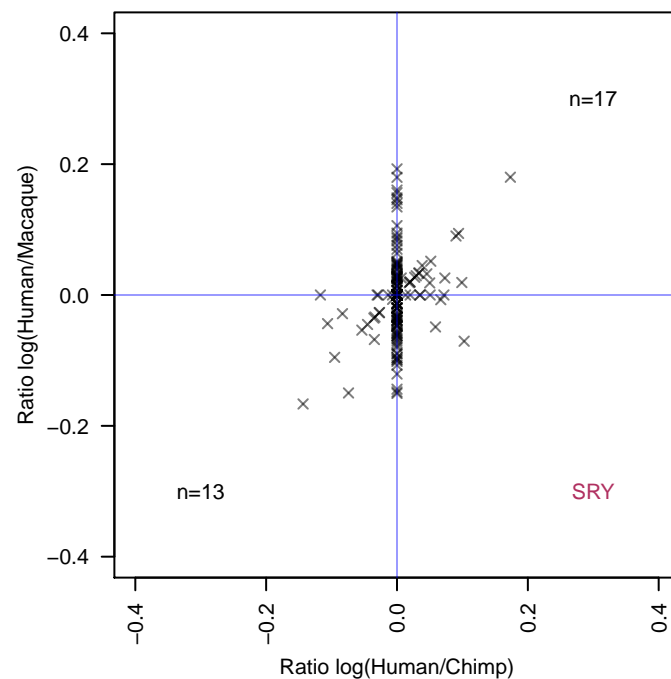

commonFibroblast.final.bed

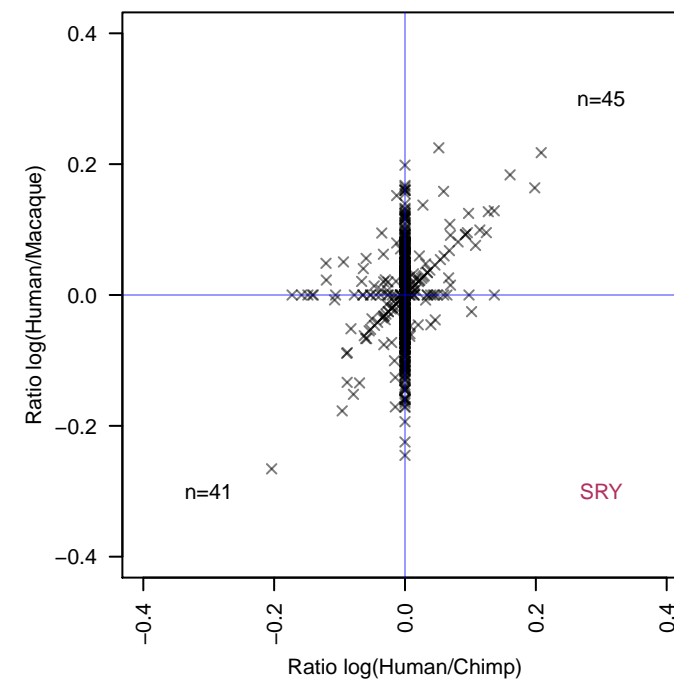

ChimpUpFibroblast.final.bed

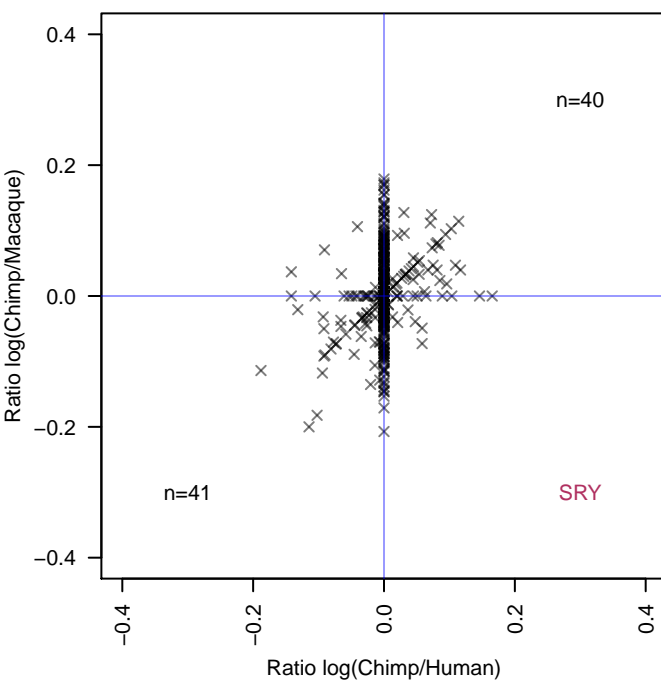

ChimpDownFibroblast.final.bed

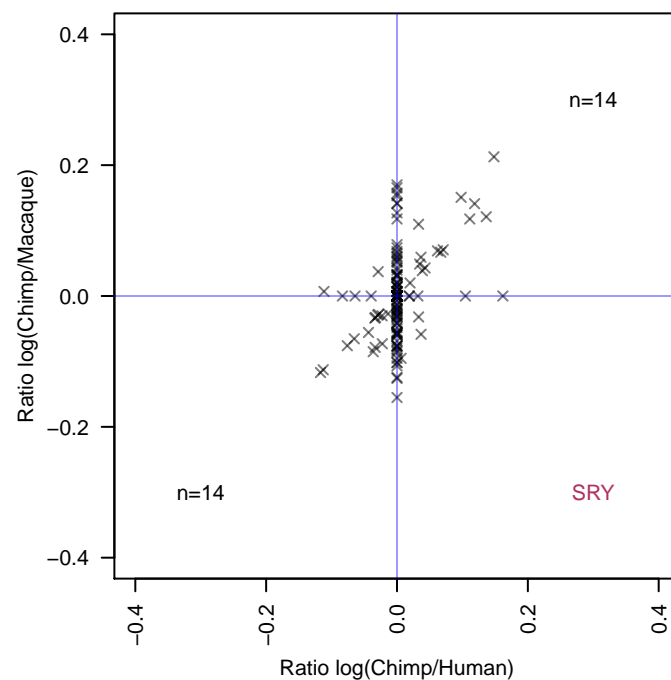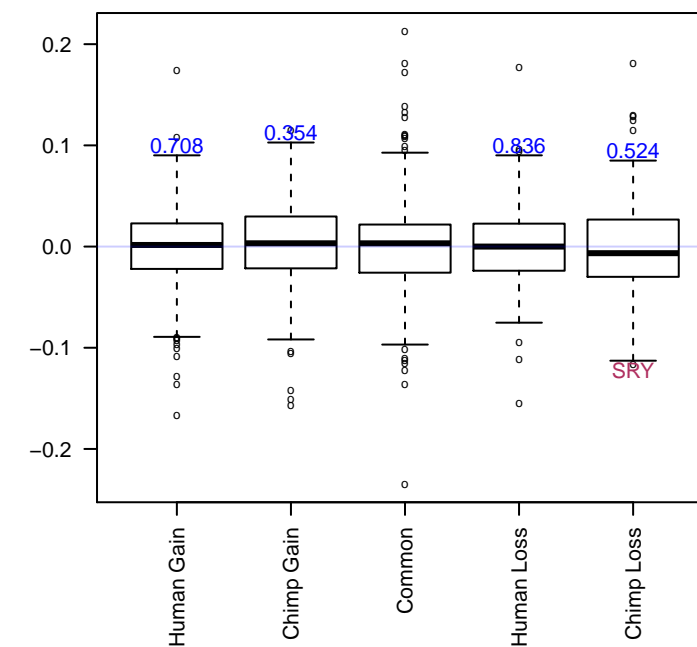

54

HumanUpFibroblast.final.bed

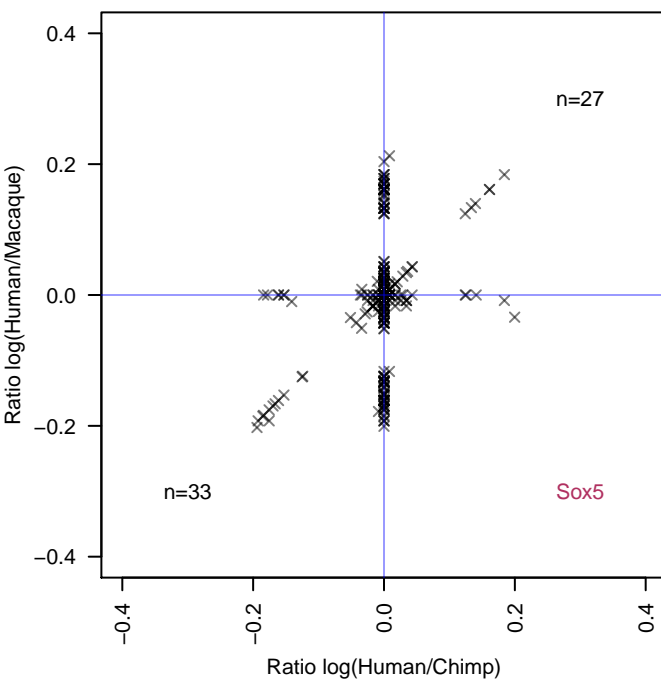

HumanDownFibroblast.final.bed

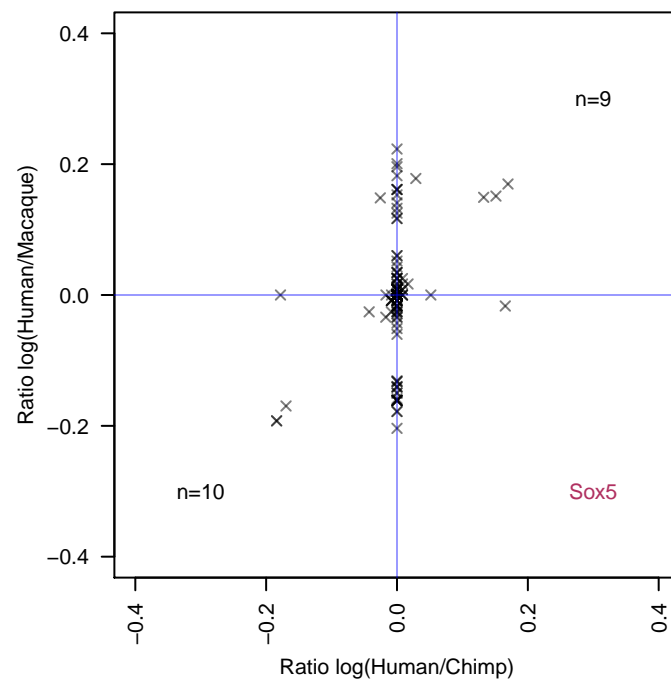

commonFibroblast.final.bed

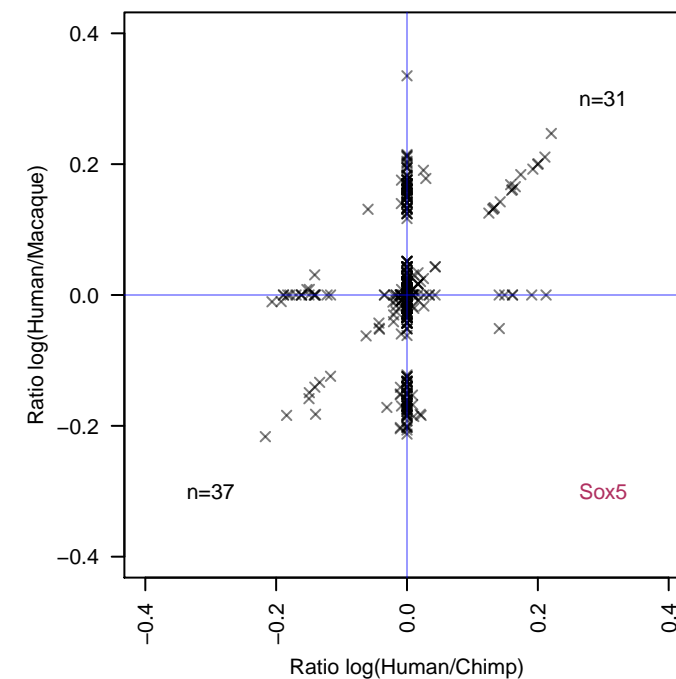

ChimpUpFibroblast.final.bed

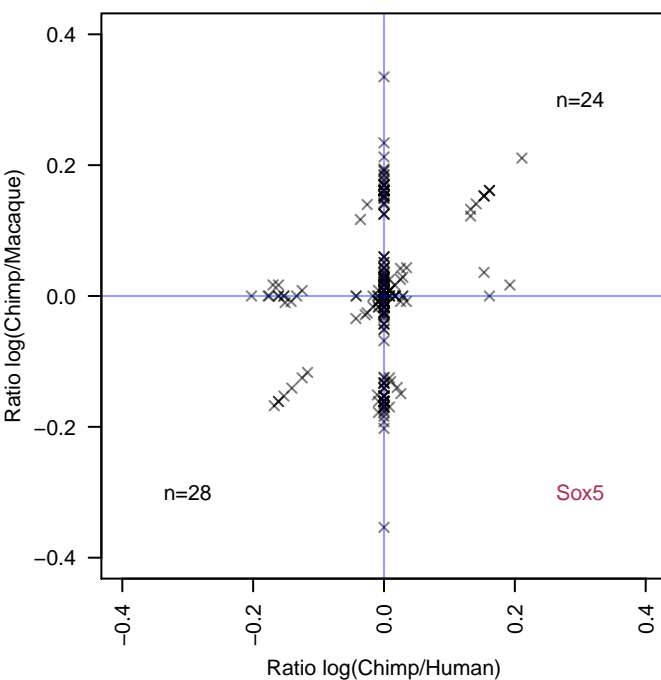

ChimpDownFibroblast.final.bed

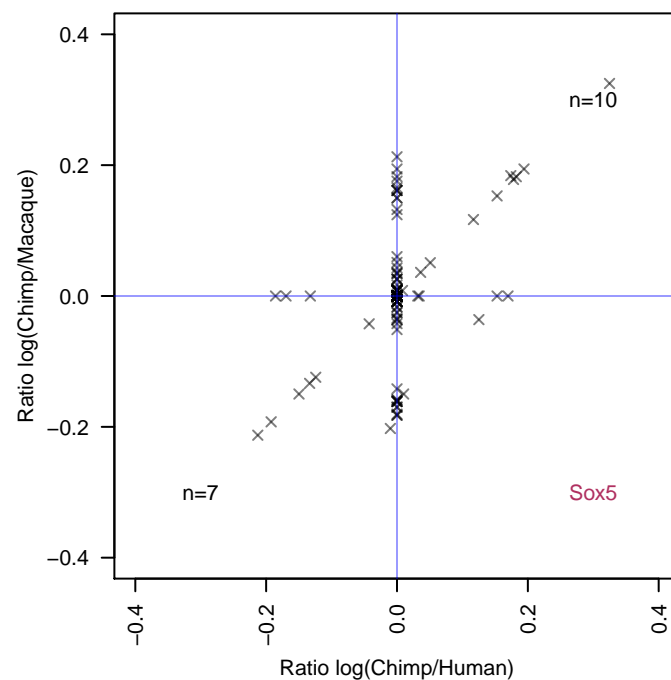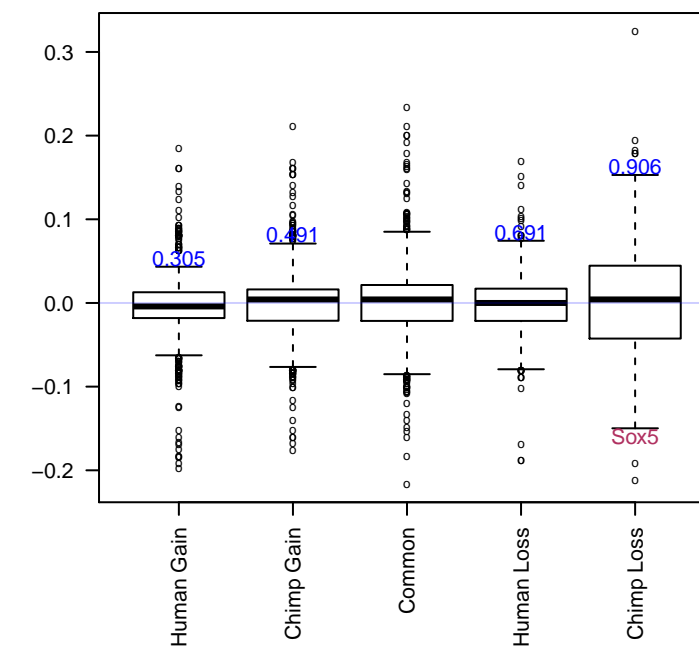

55

HumanUpFibroblast.final.bed

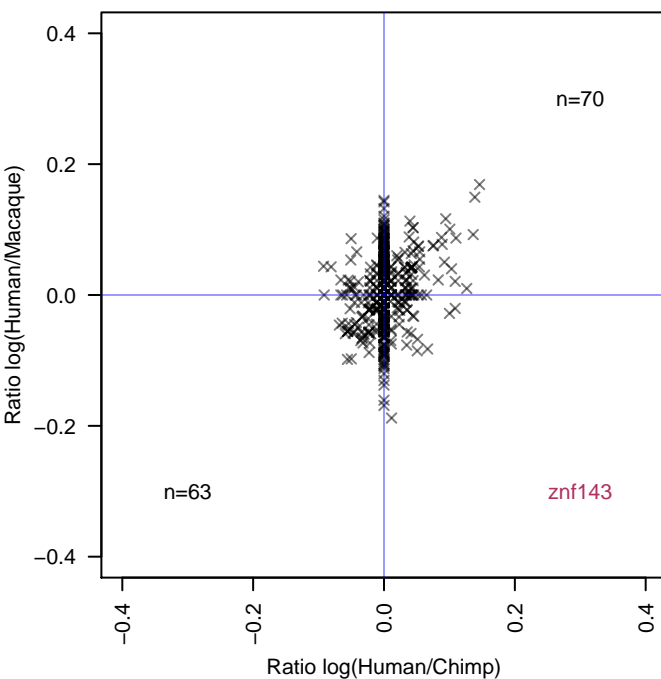

HumanDownFibroblast.final.bed

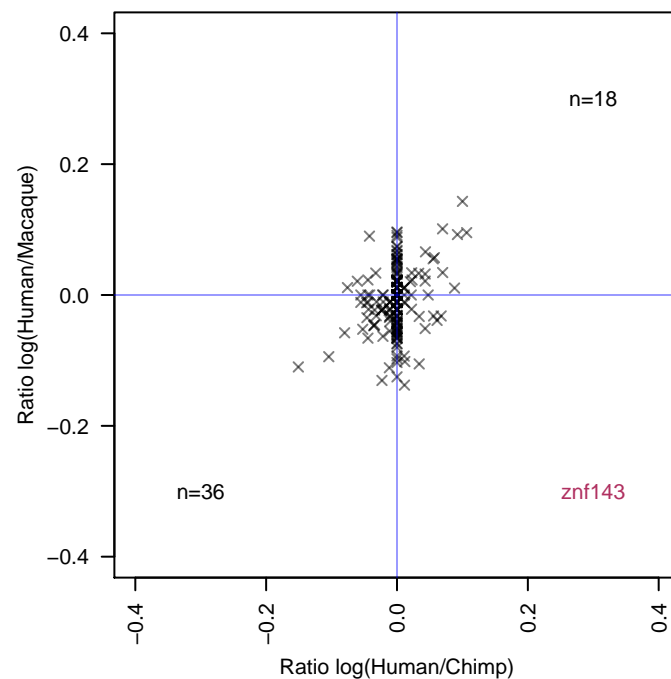

commonFibroblast.final.bed

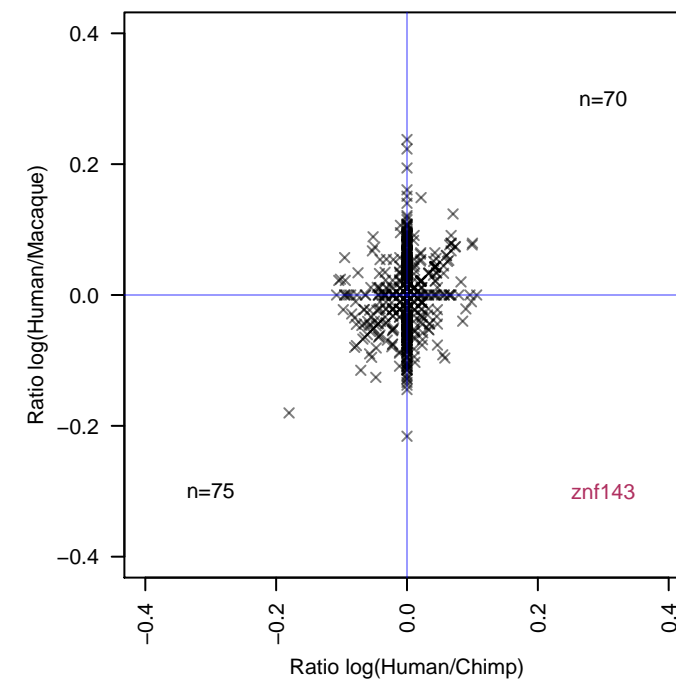

ChimpUpFibroblast.final.bed

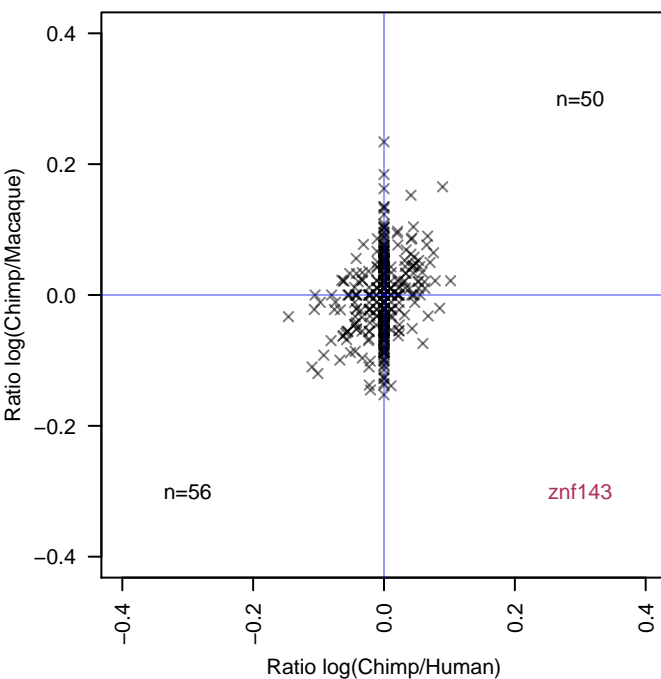

ChimpDownFibroblast.final.bed

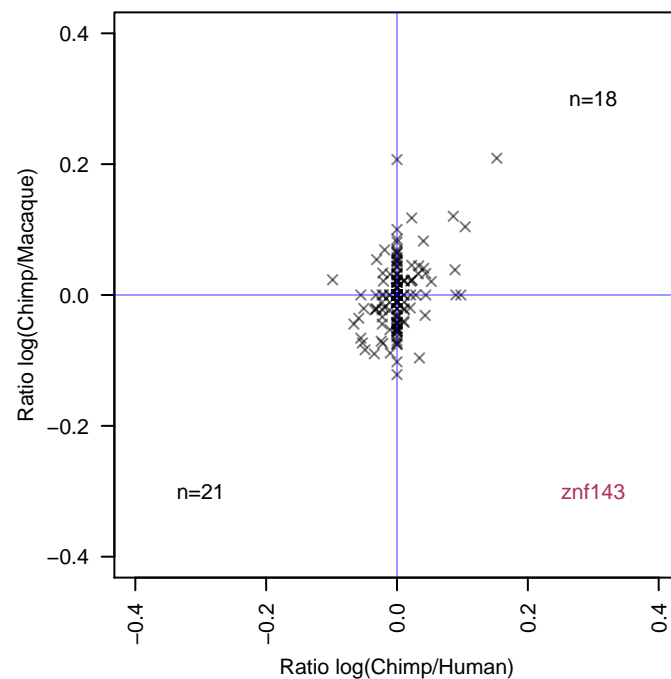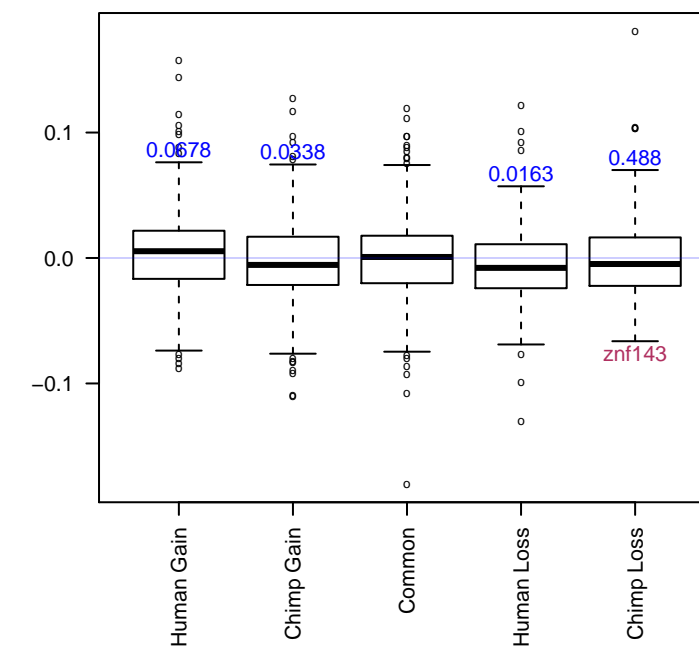

HumanUpFibroblast.final.bed

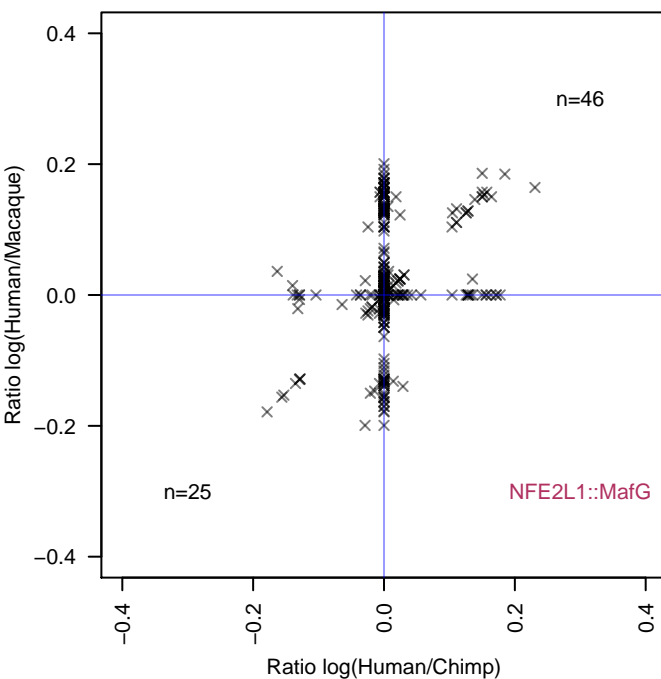

HumanDownFibroblast.final.bed

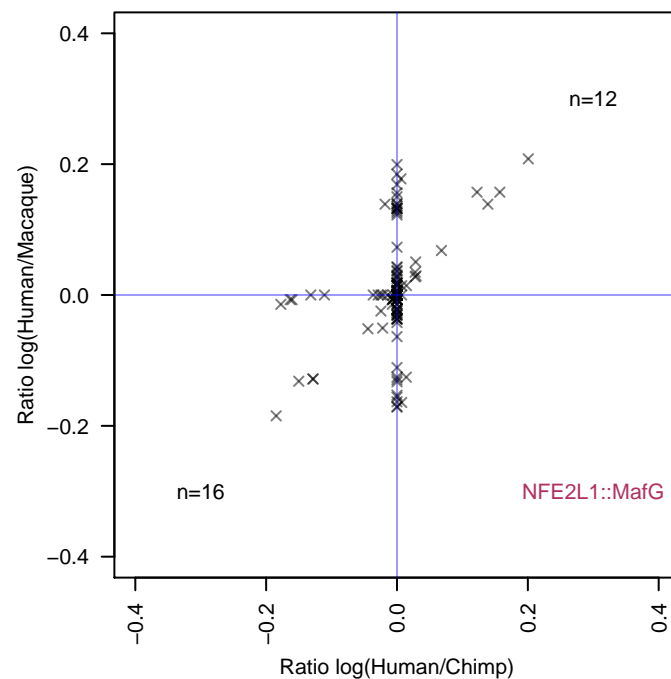

commonFibroblast.final.bed

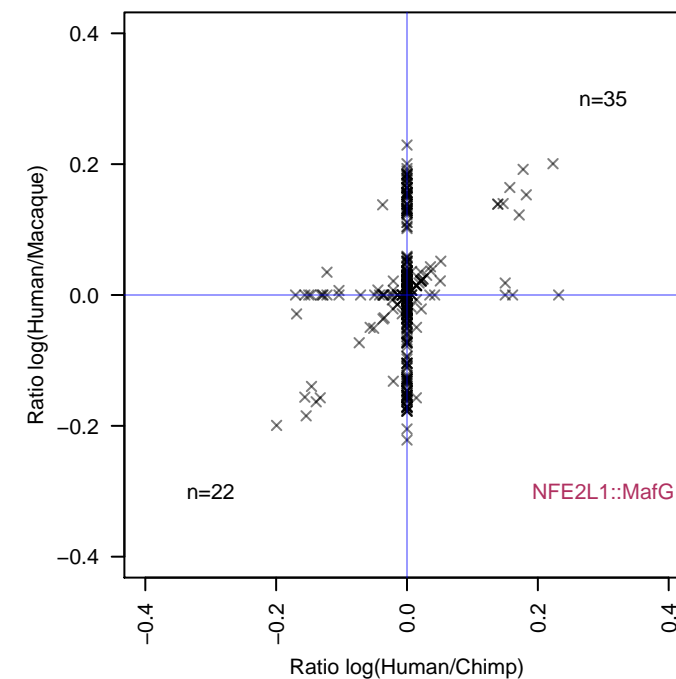

ChimpUpFibroblast.final.bed

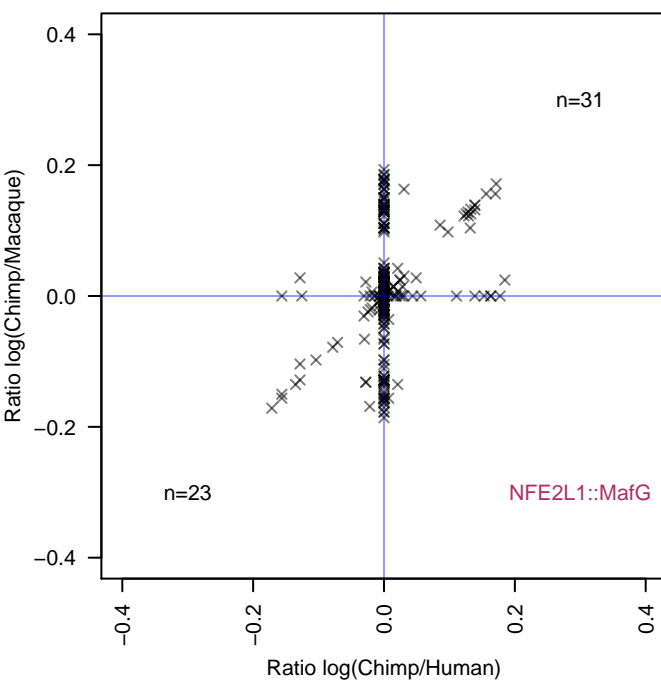

ChimpDownFibroblast.final.bed

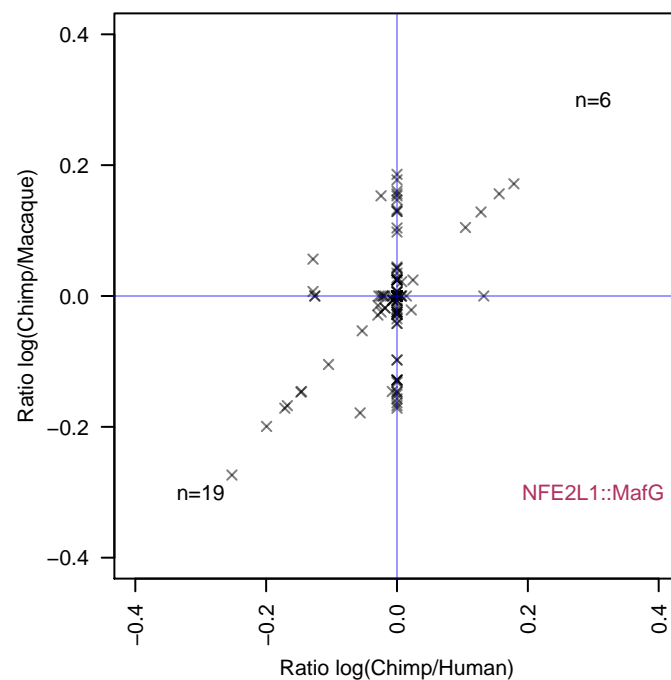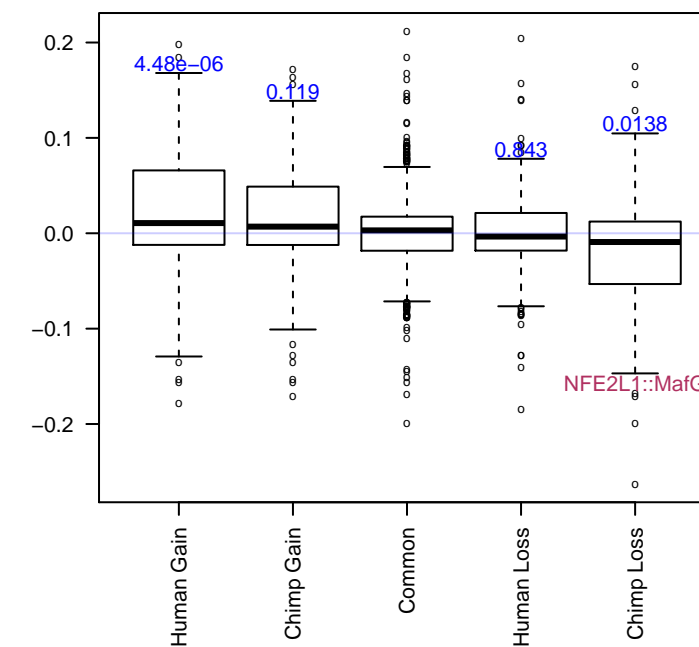

57

HumanUpFibroblast.final.bed

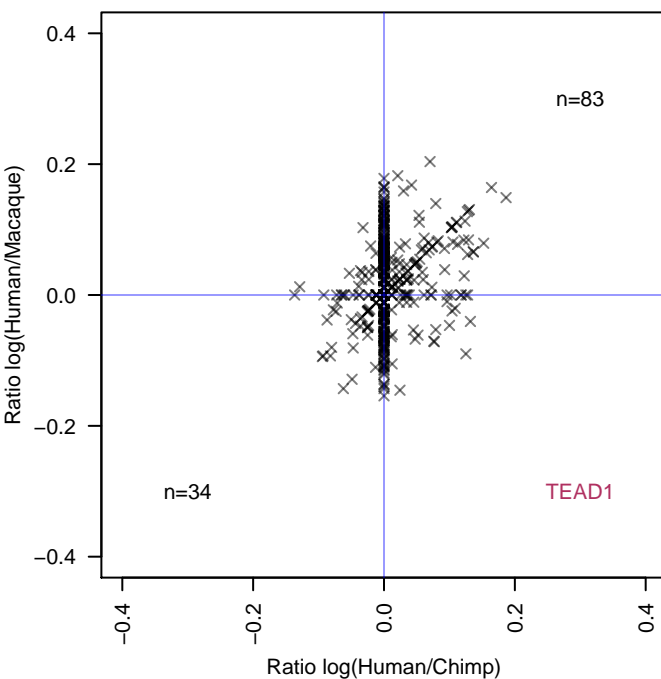

HumanDownFibroblast.final.bed

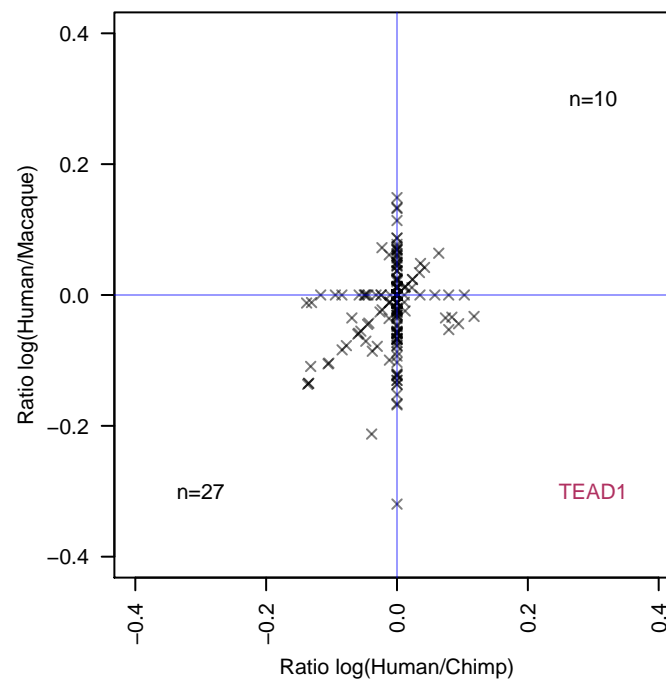

commonFibroblast.final.bed

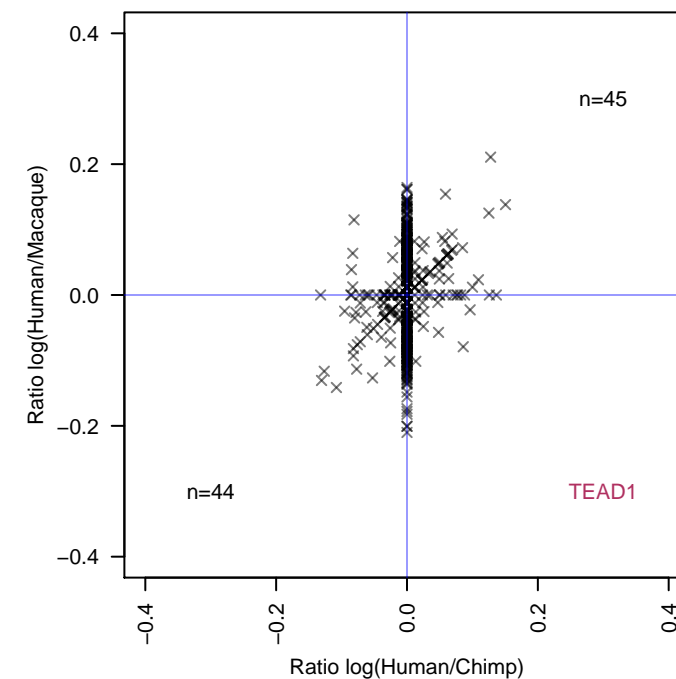

ChimpUpFibroblast.final.bed

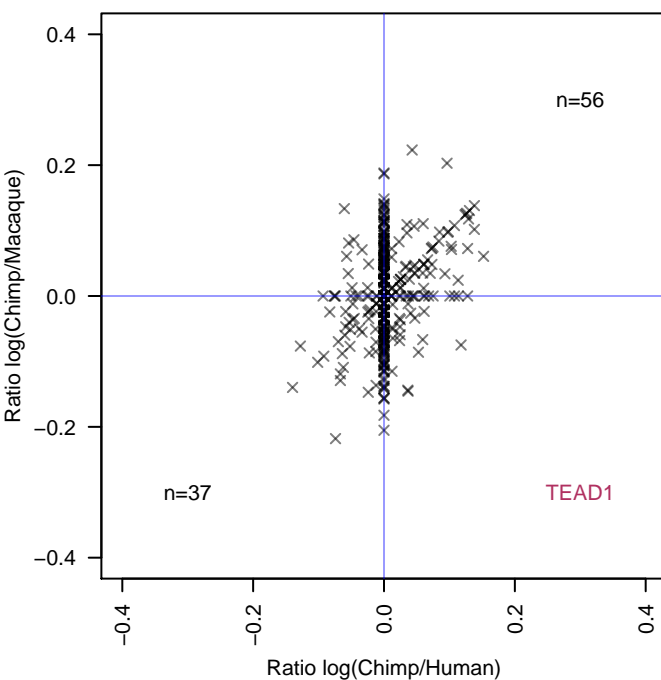

ChimpDownFibroblast.final.bed

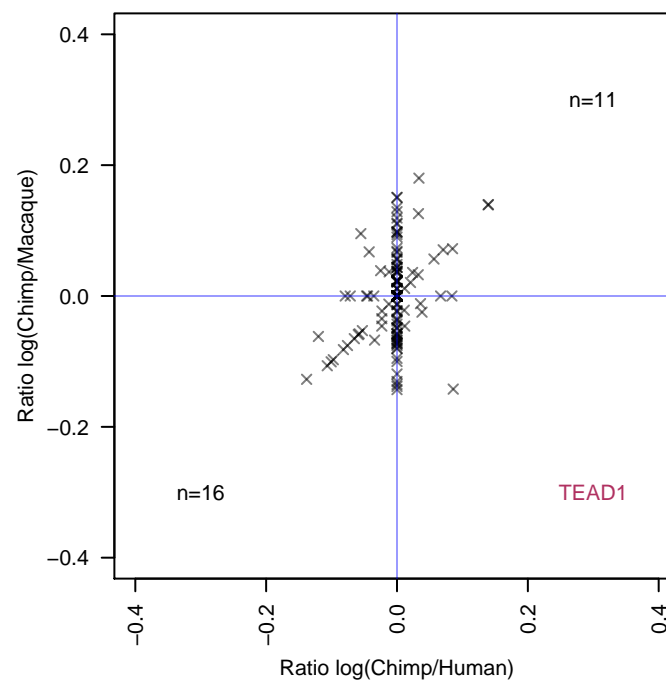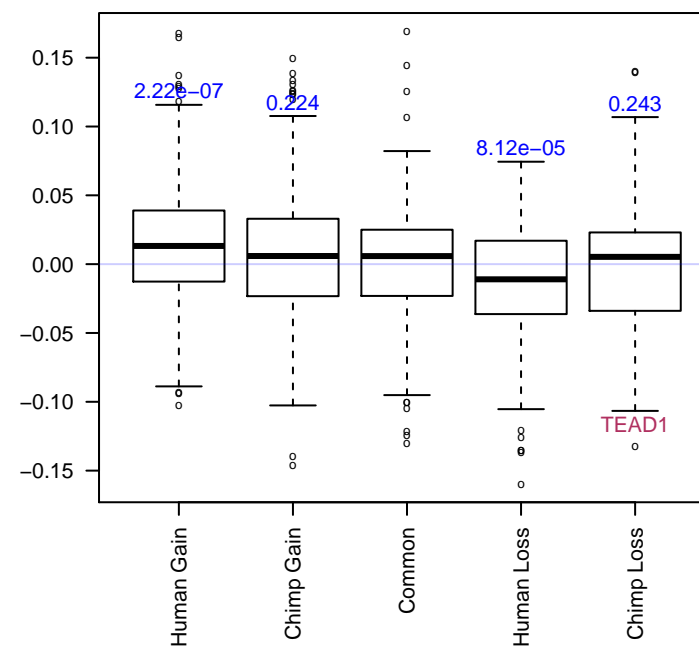

58

HumanUpFibroblast.final.bed

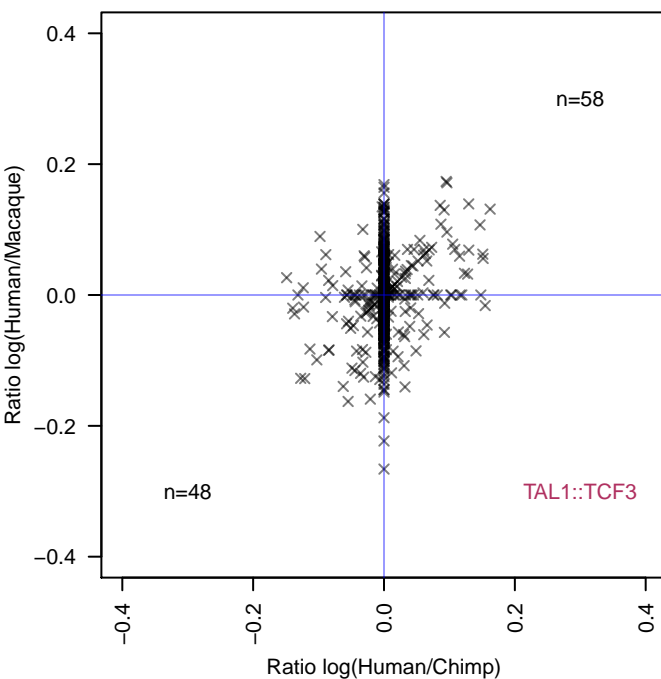

HumanDownFibroblast.final.bed

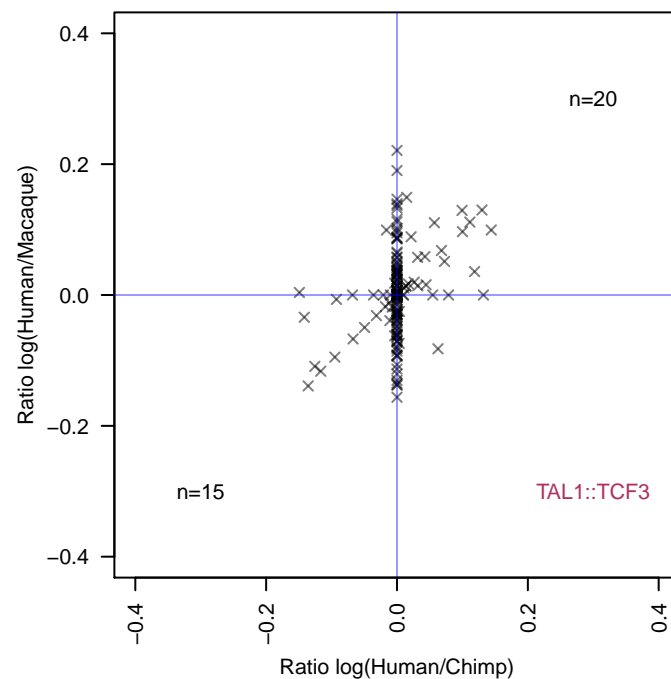

commonFibroblast.final.bed

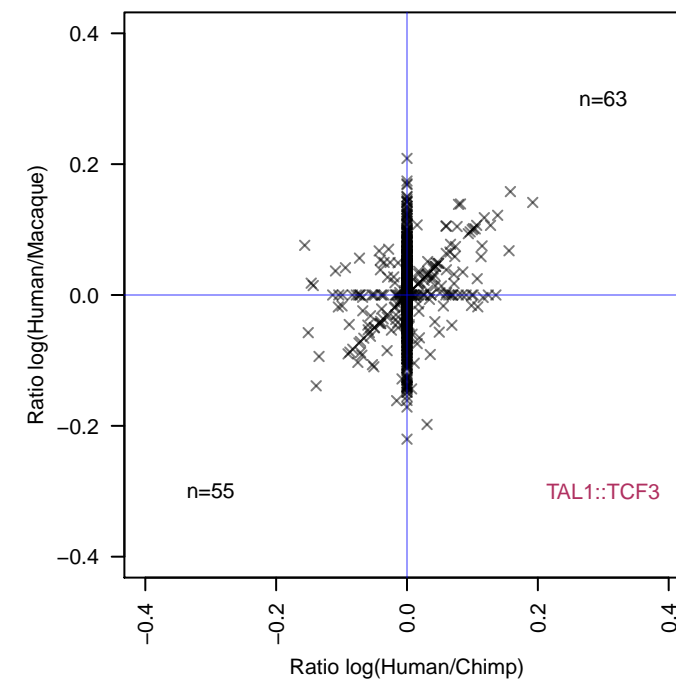

ChimpUpFibroblast.final.bed

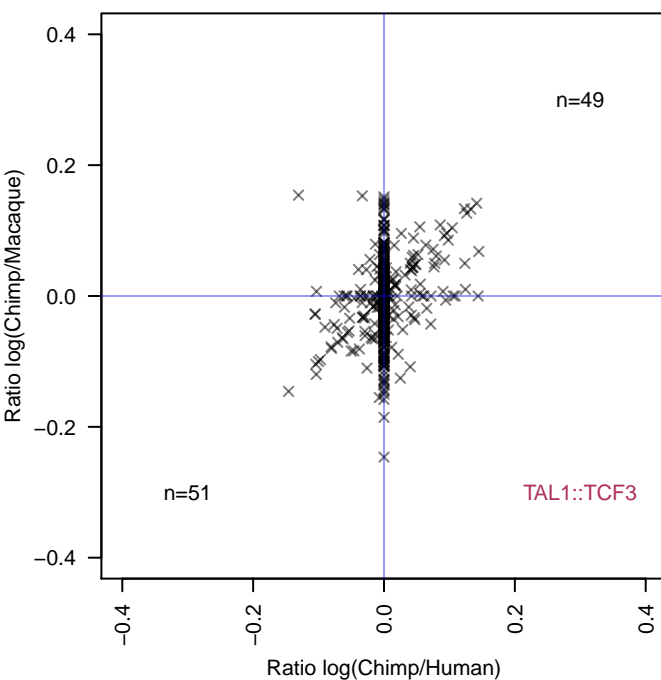

ChimpDownFibroblast.final.bed

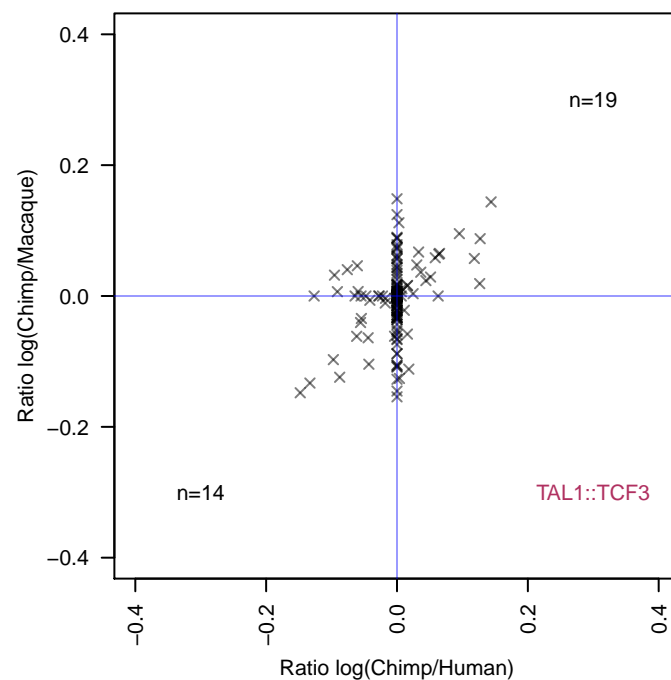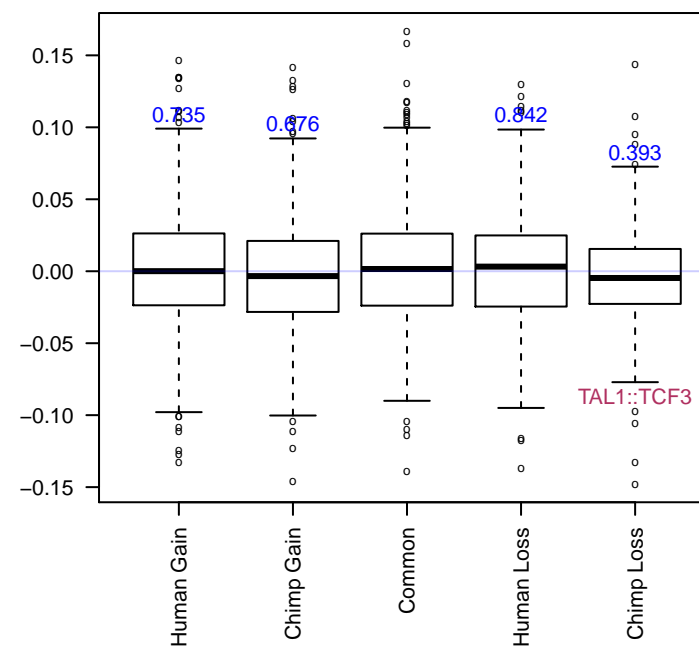

59

HumanUpFibroblast.final.bed

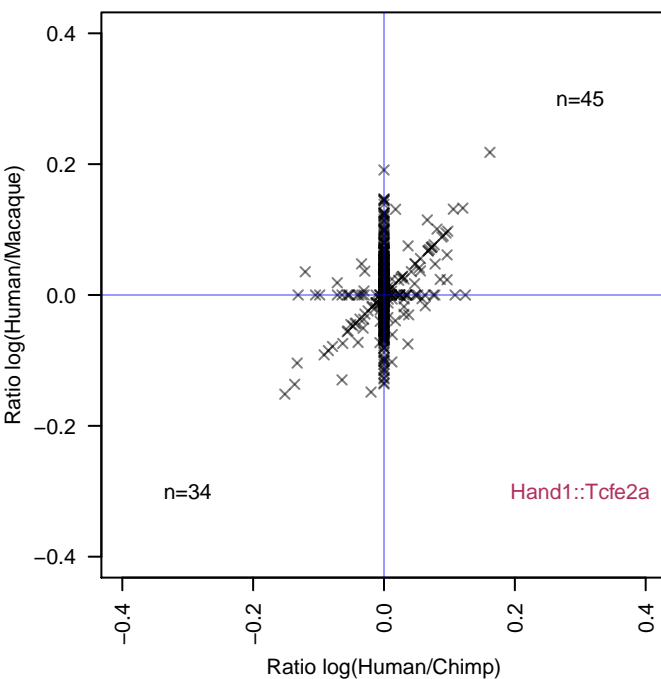

HumanDownFibroblast.final.bed

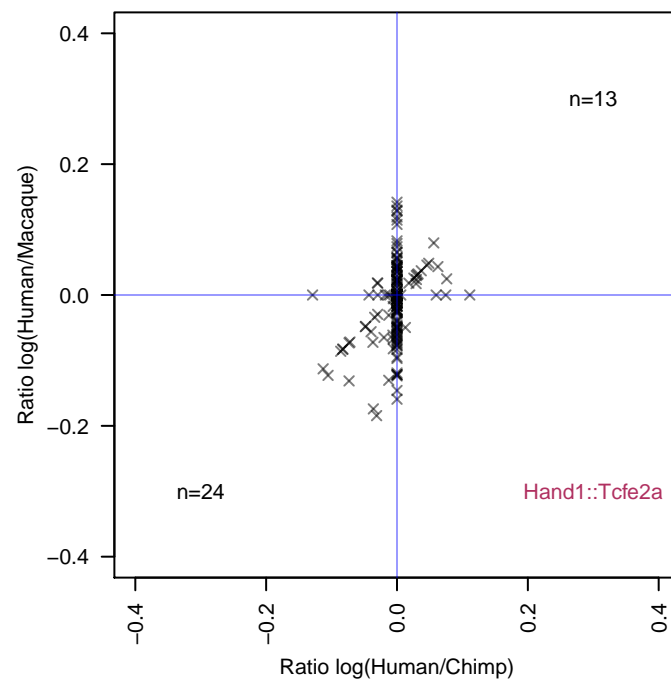

commonFibroblast.final.bed

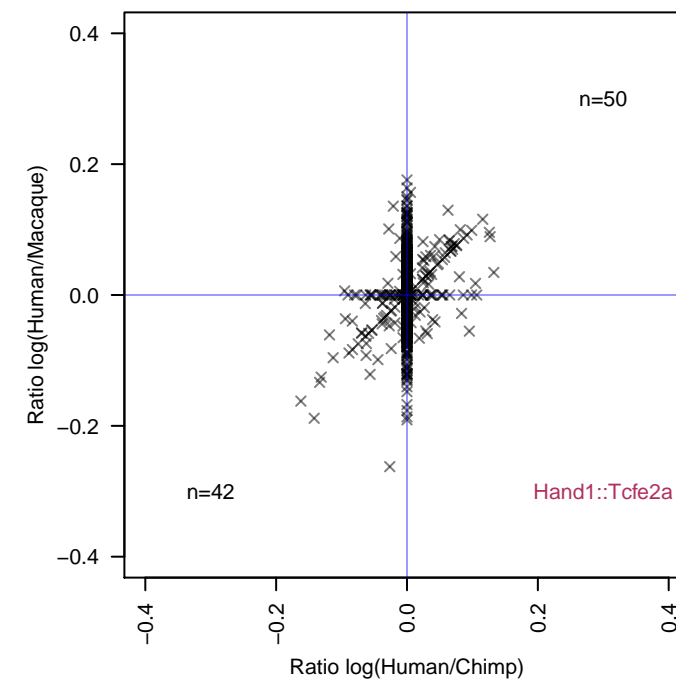

ChimpUpFibroblast.final.bed

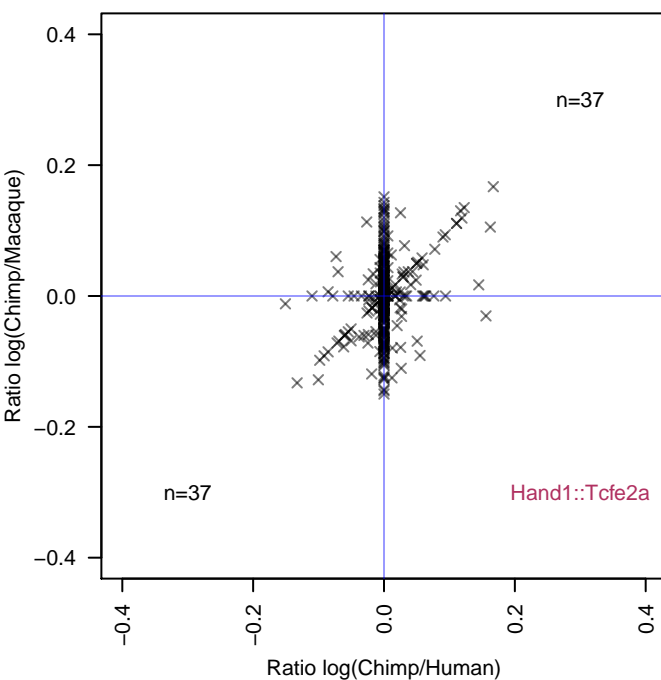

ChimpDownFibroblast.final.bed

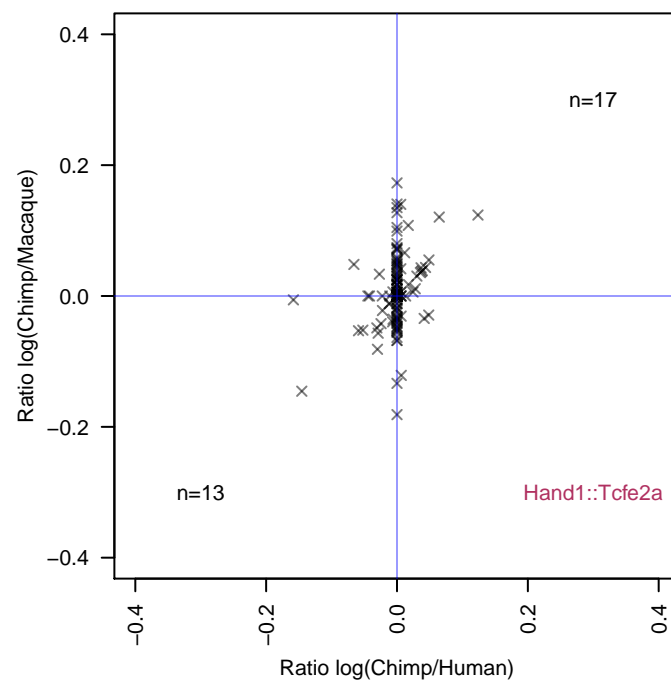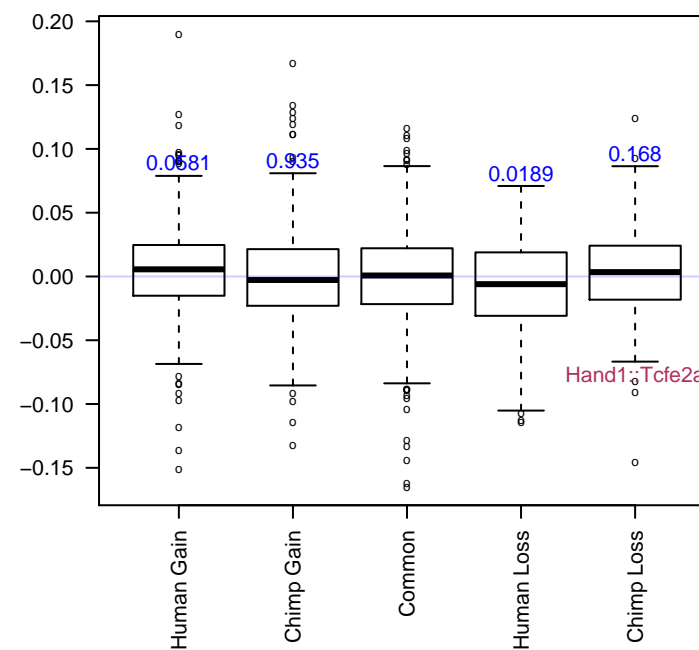

60

HumanUpFibroblast.final.bed

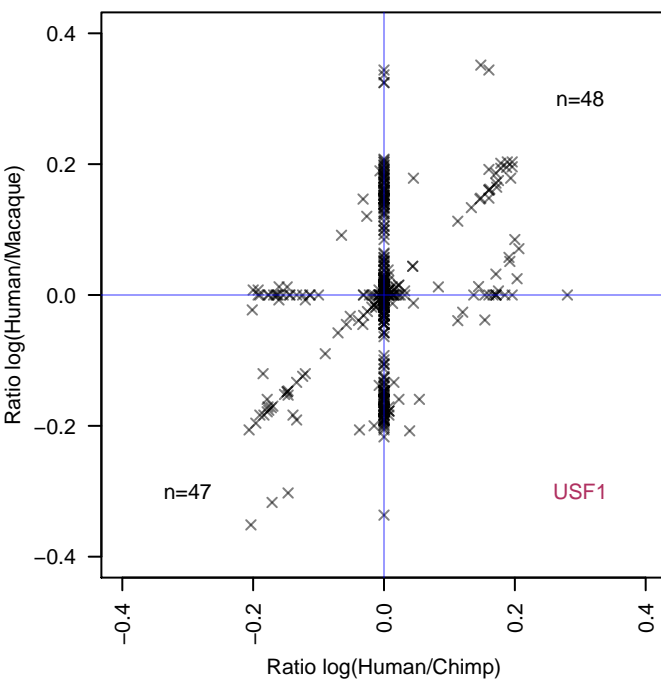

HumanDownFibroblast.final.bed

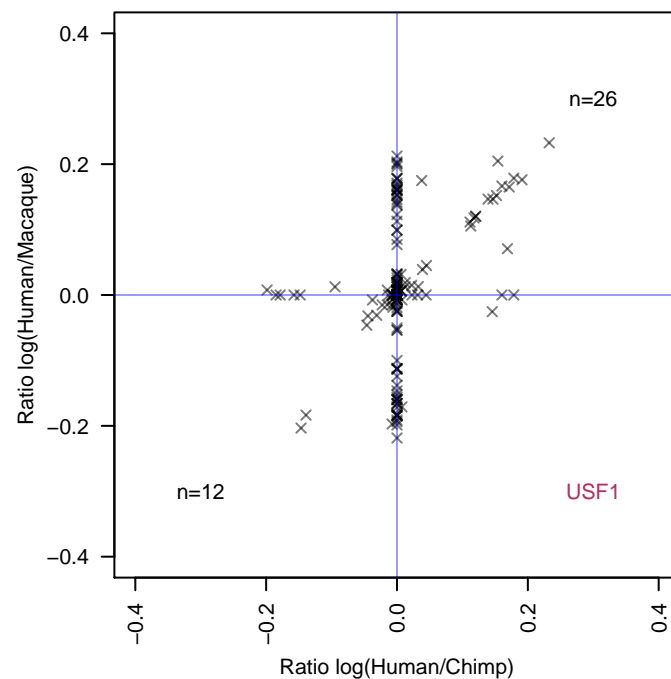

commonFibroblast.final.bed

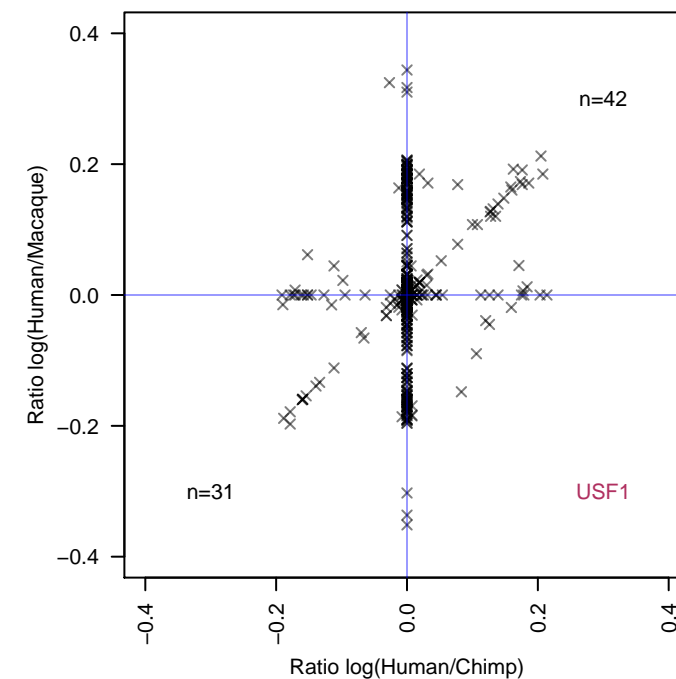

ChimpUpFibroblast.final.bed

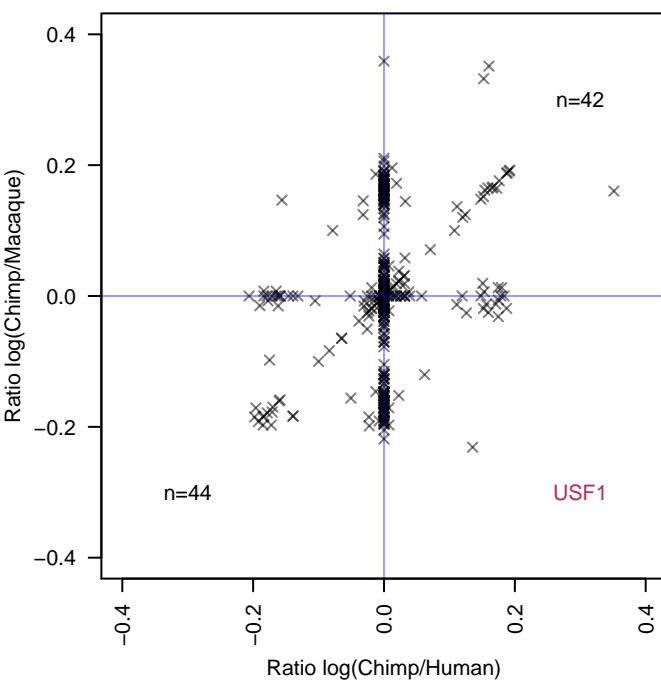

ChimpDownFibroblast.final.bed

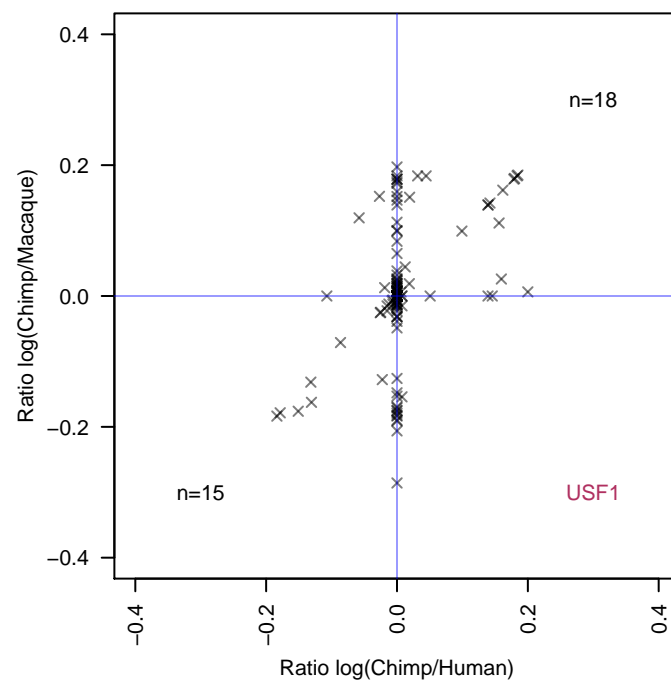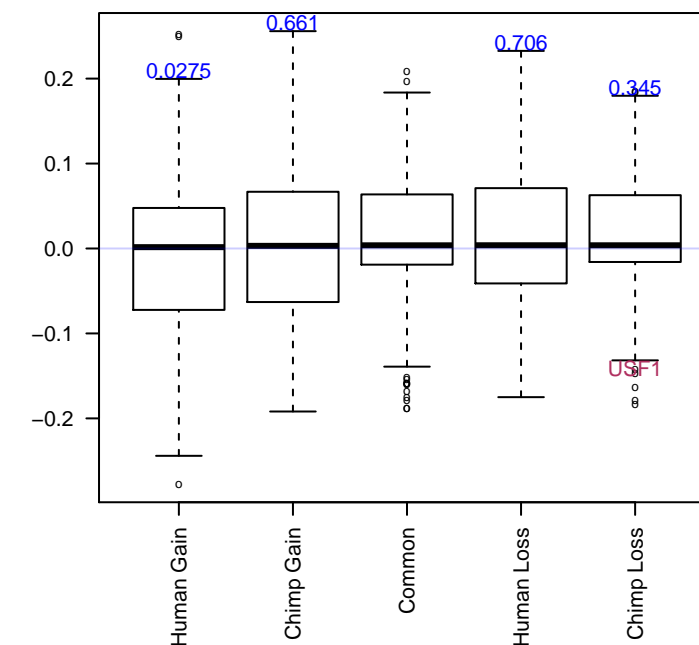

61

HumanUpFibroblast.final.bed

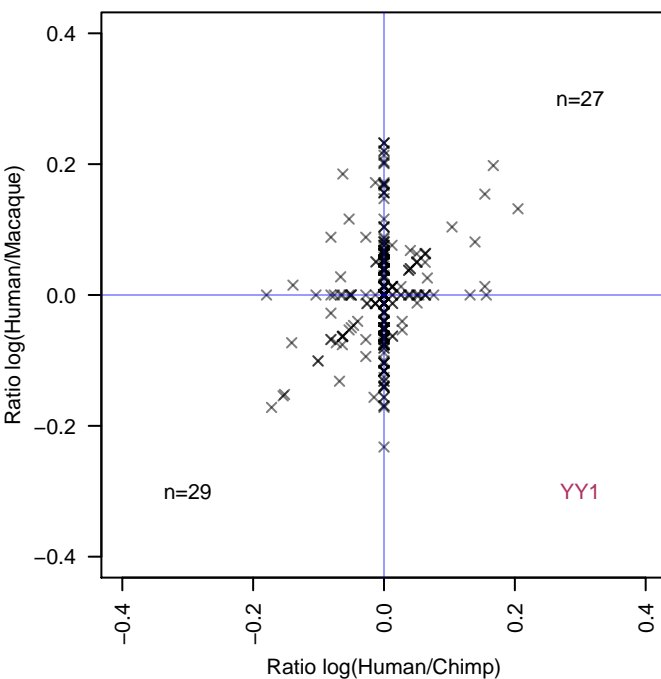

HumanDownFibroblast.final.bed

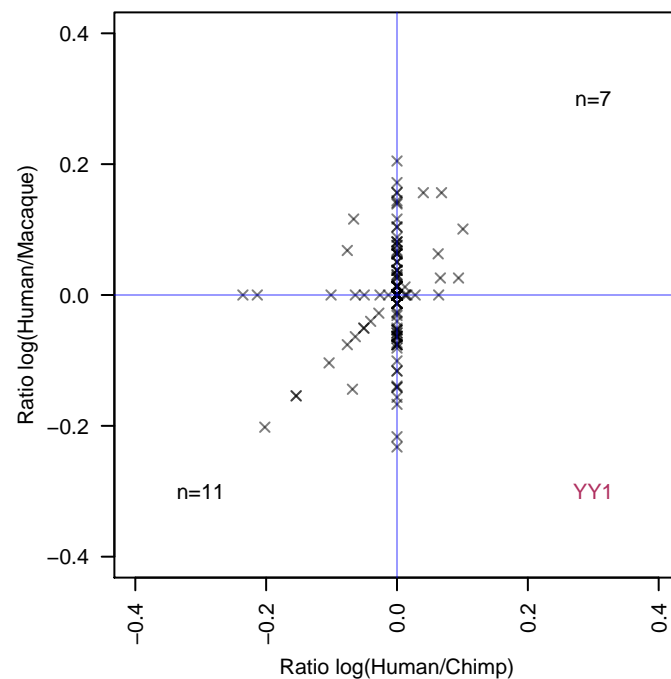

commonFibroblast.final.bed

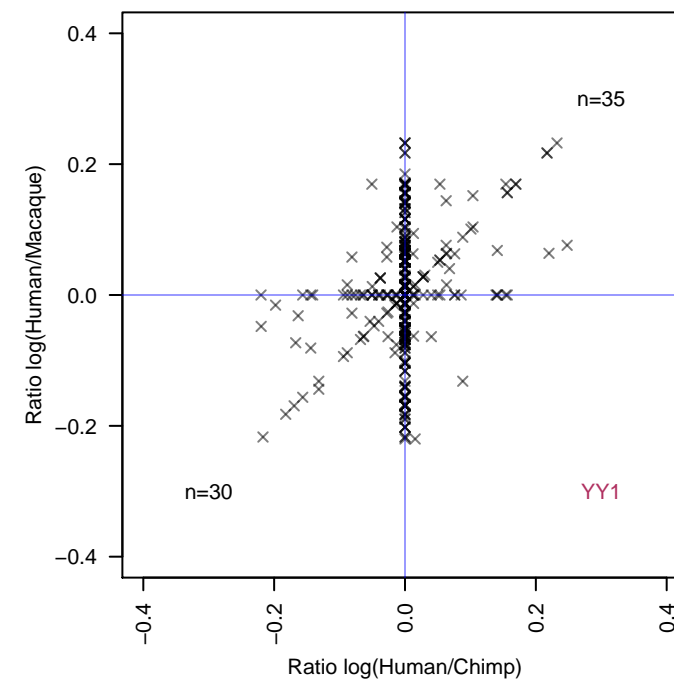

ChimpUpFibroblast.final.bed

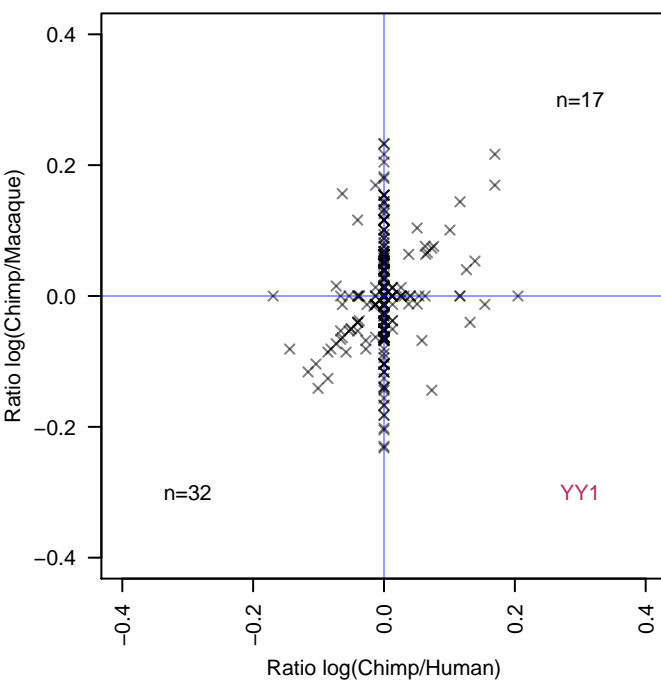

ChimpDownFibroblast.final.bed

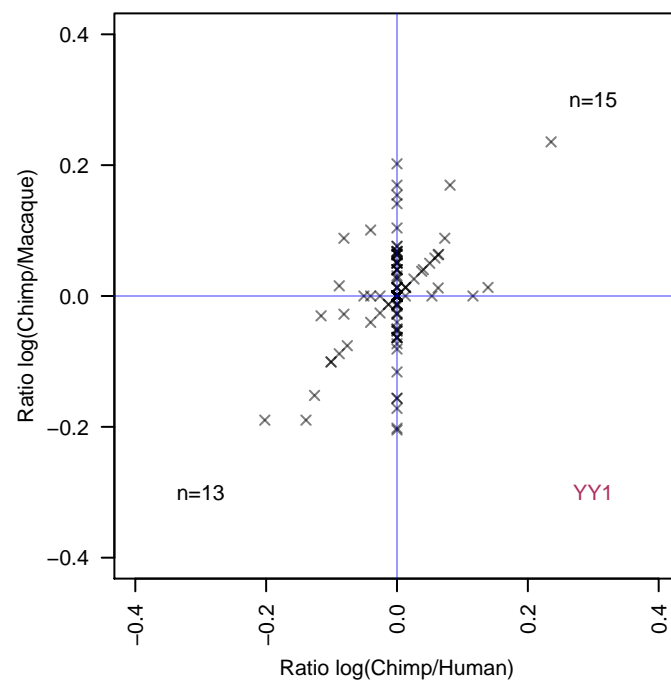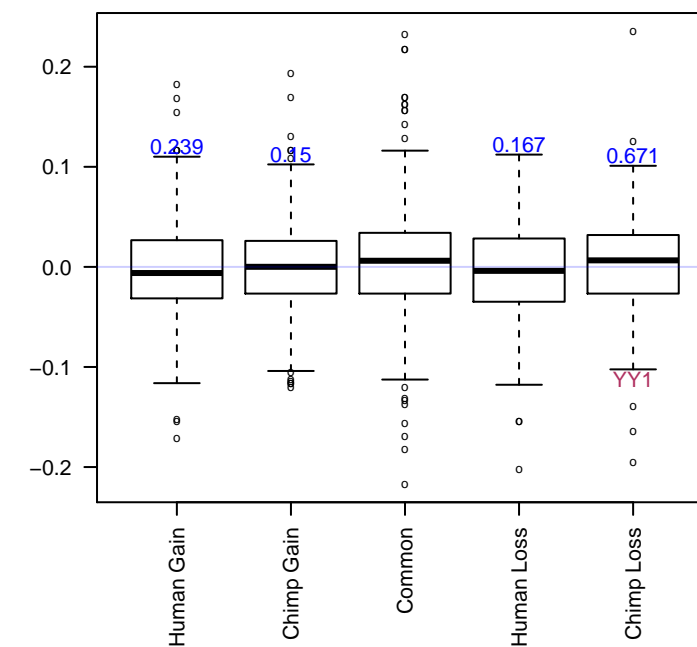

62

HumanUpFibroblast.final.bed

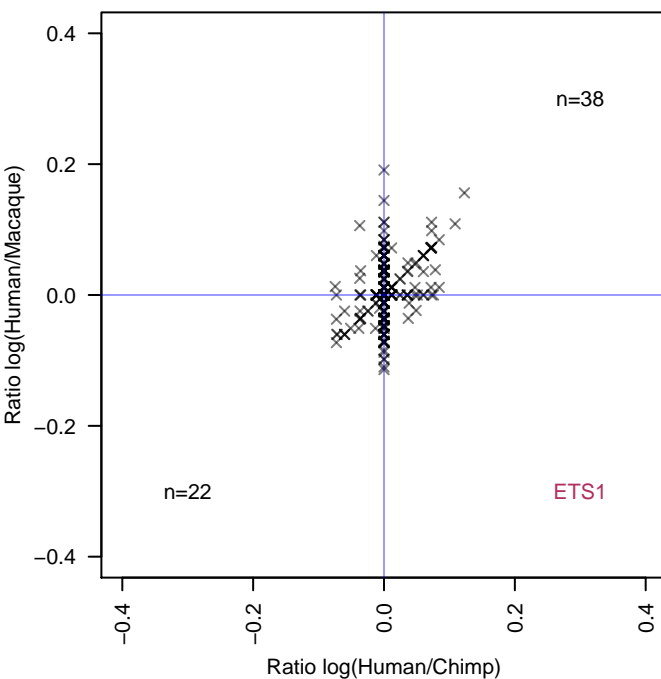

HumanDownFibroblast.final.bed

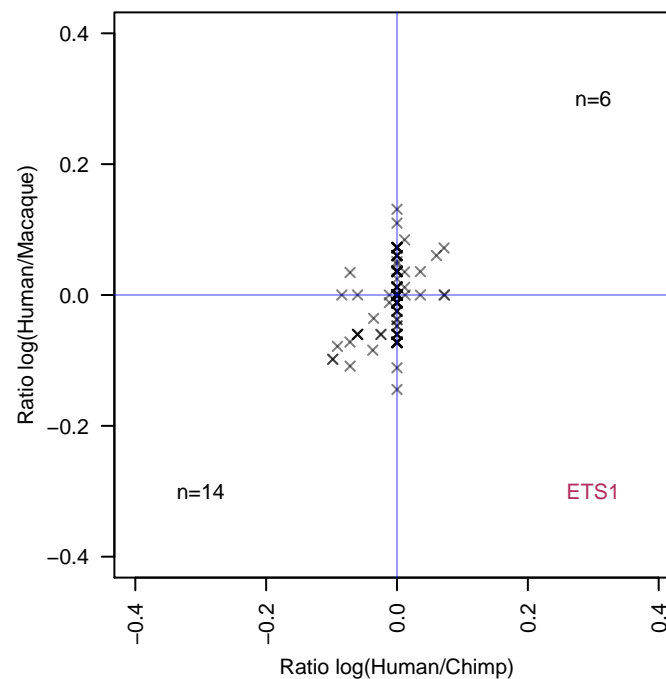

commonFibroblast.final.bed

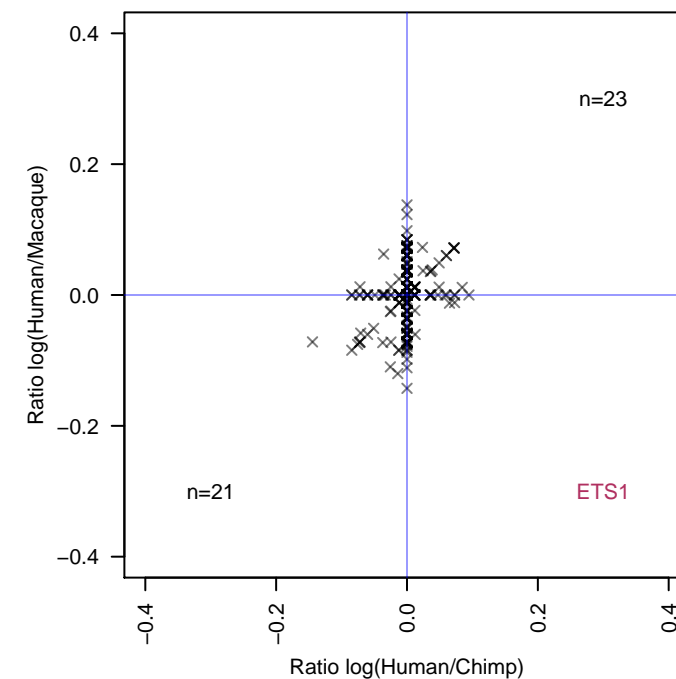

ChimpUpFibroblast.final.bed

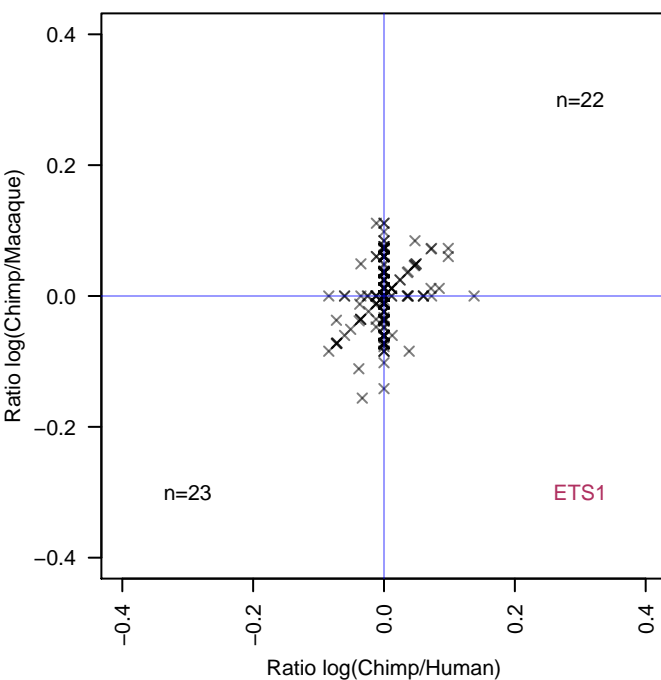

ChimpDownFibroblast.final.bed

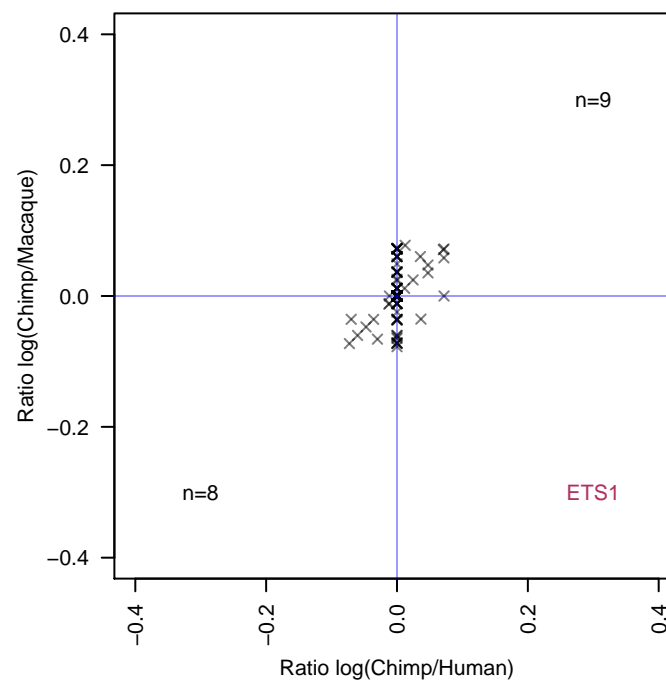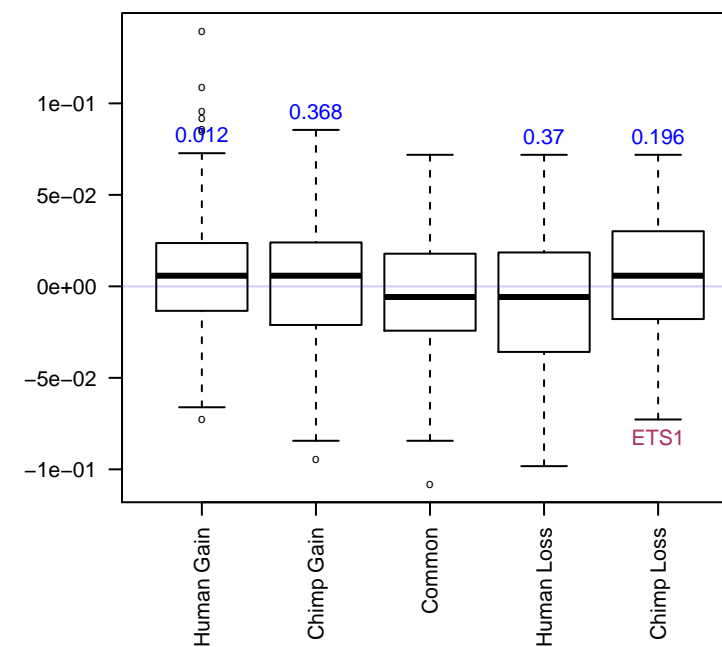

63

HumanUpFibroblast.final.bed

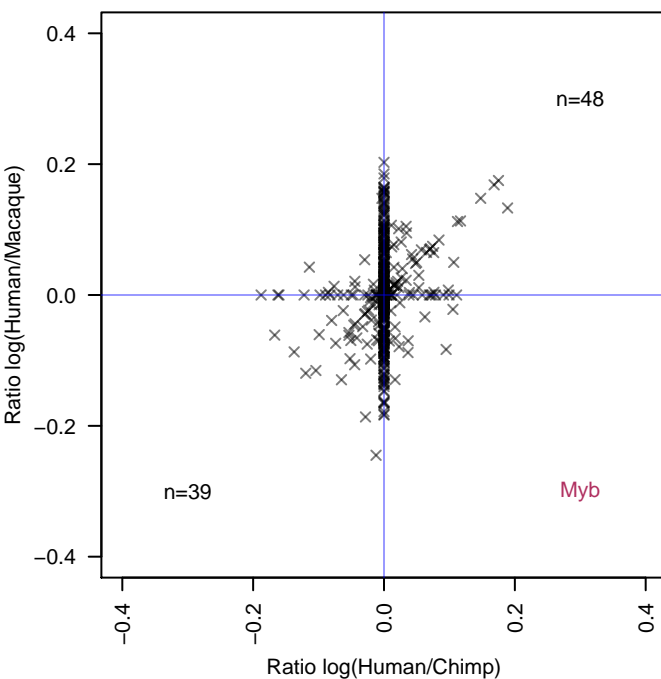

HumanDownFibroblast.final.bed

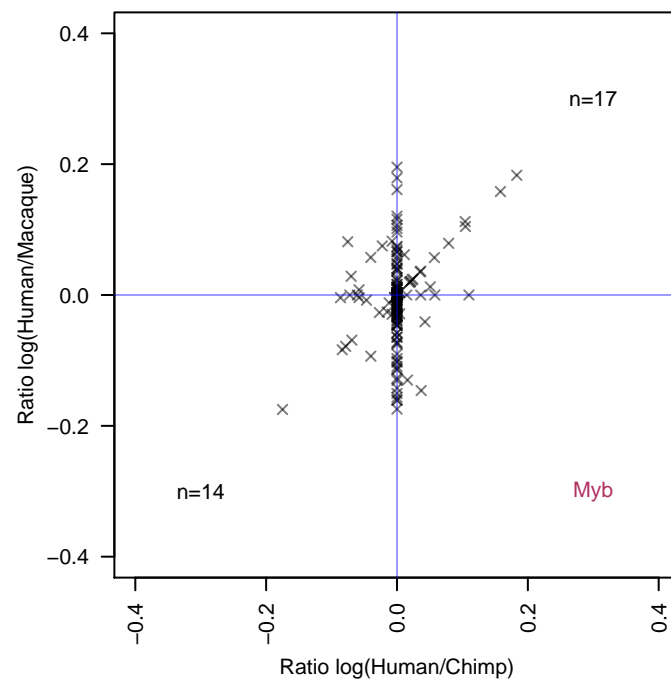

commonFibroblast.final.bed

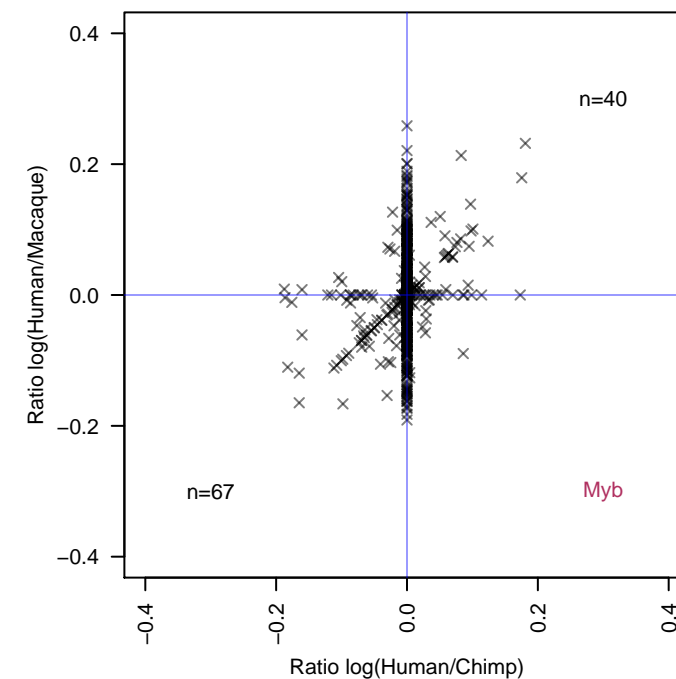

ChimpUpFibroblast.final.bed

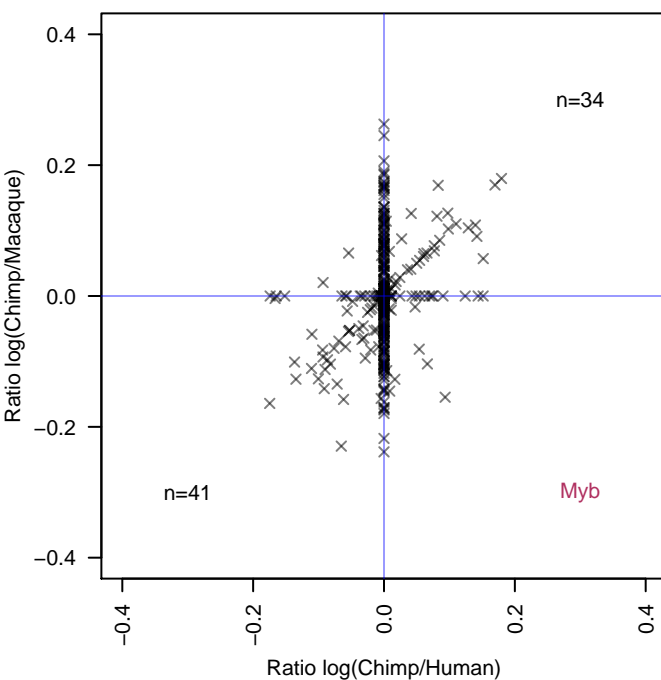

ChimpDownFibroblast.final.bed

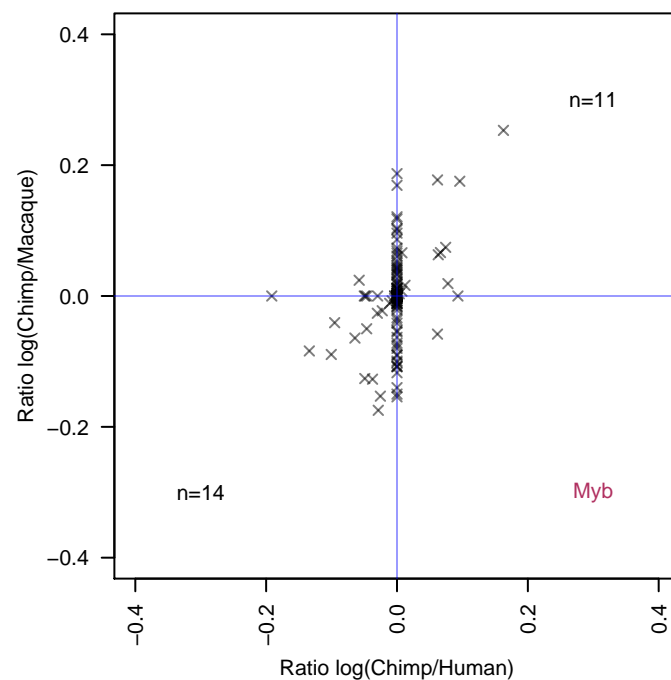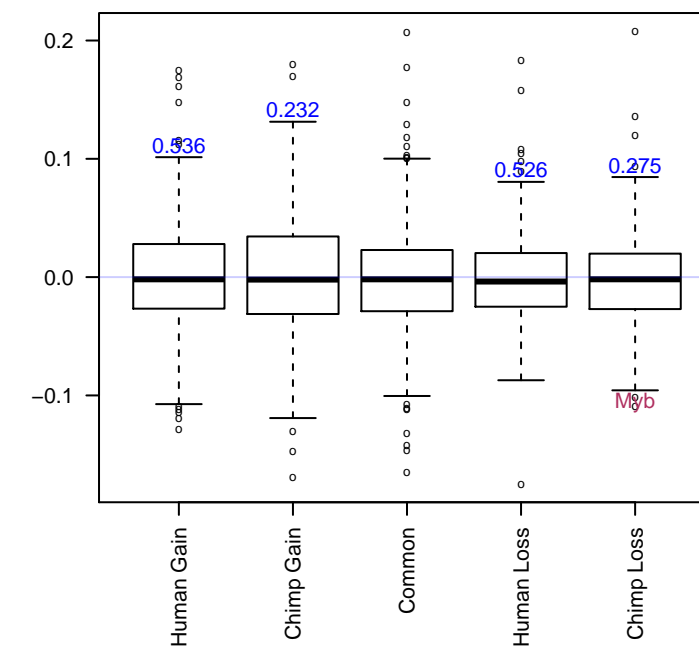

64

HumanUpFibroblast.final.bed

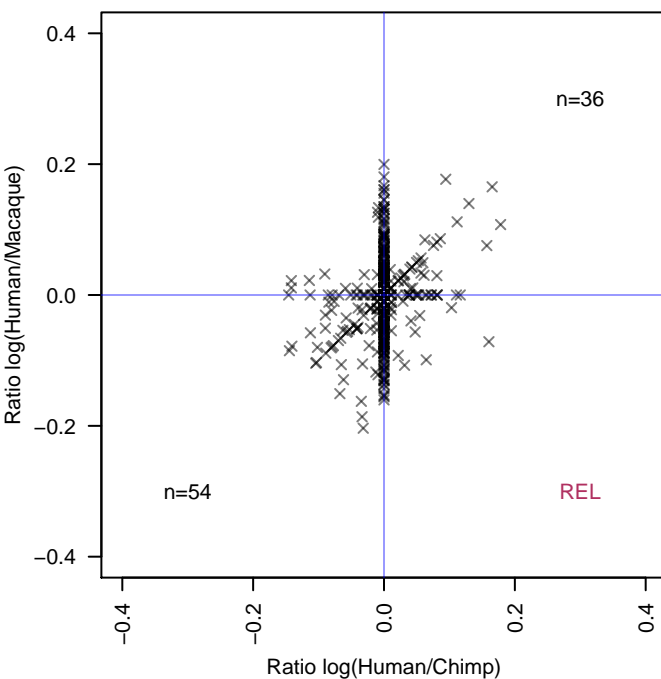

HumanDownFibroblast.final.bed

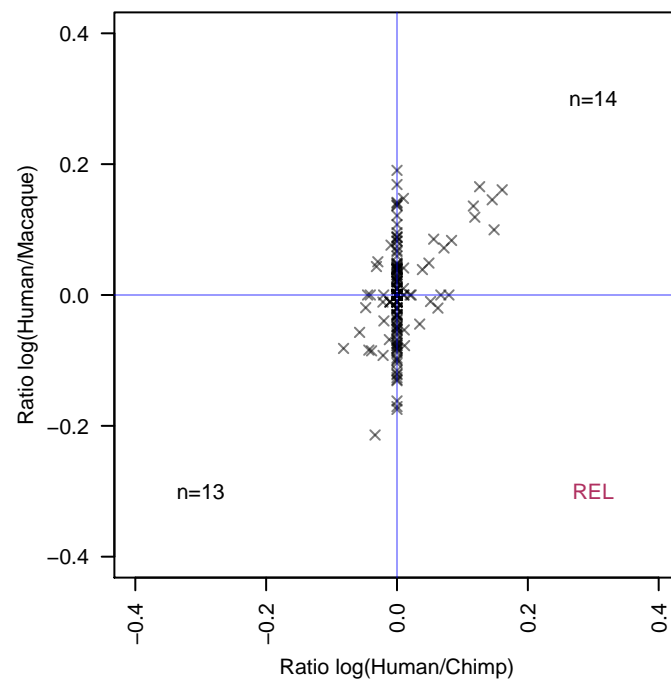

commonFibroblast.final.bed

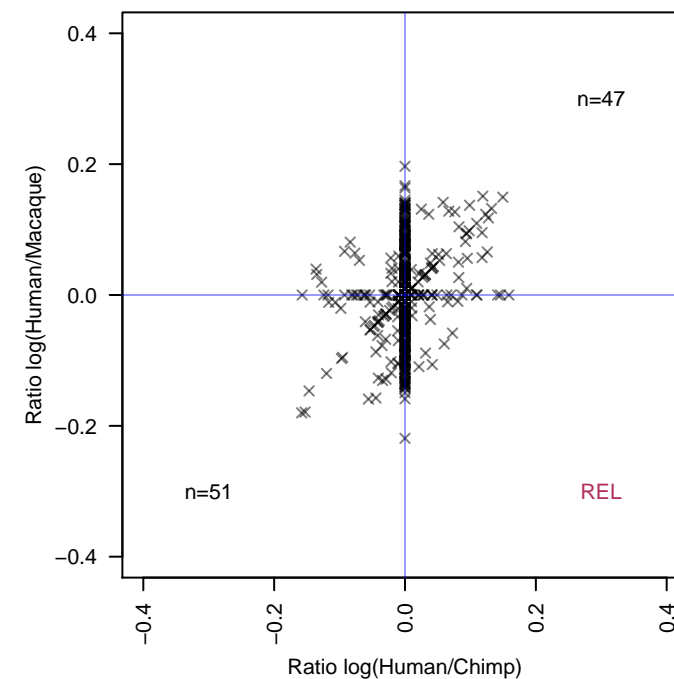

ChimpUpFibroblast.final.bed

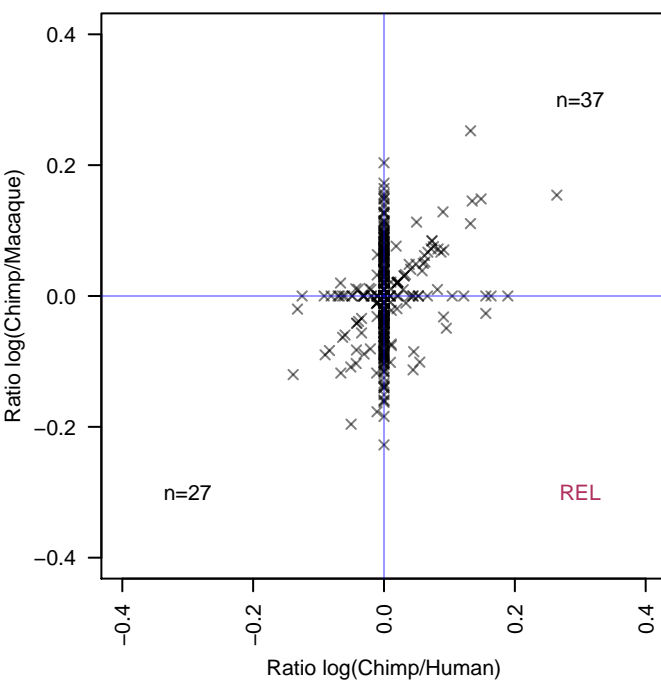

ChimpDownFibroblast.final.bed

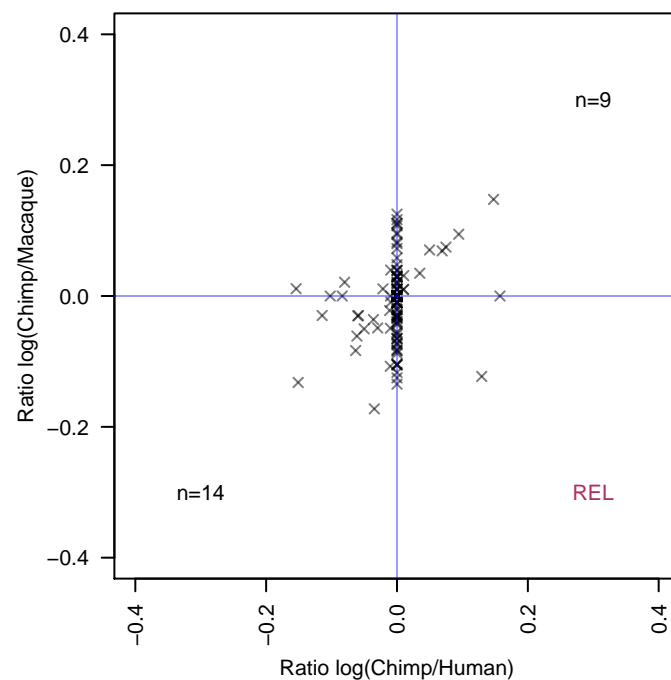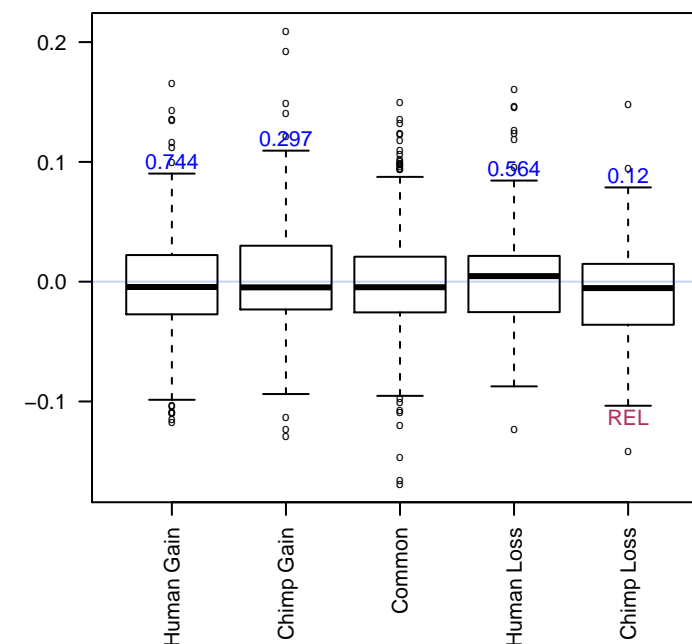

65

HumanUpFibroblast.final.bed

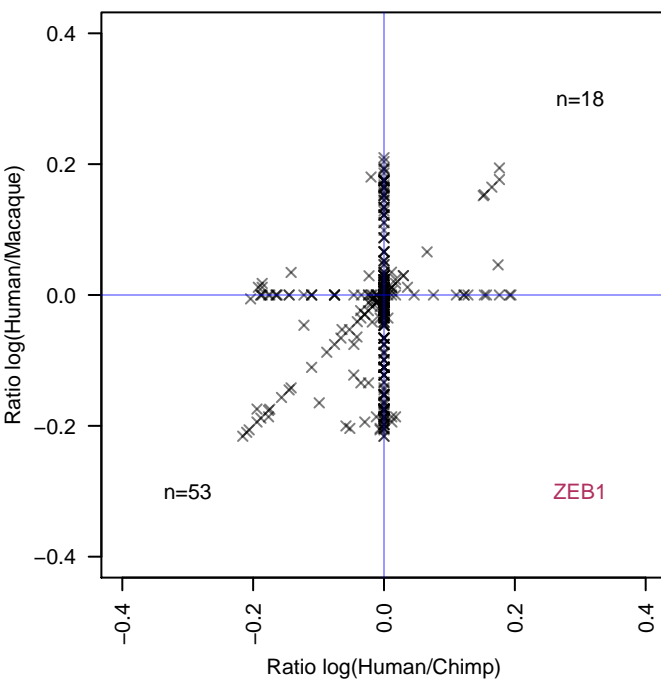

HumanDownFibroblast.final.bed

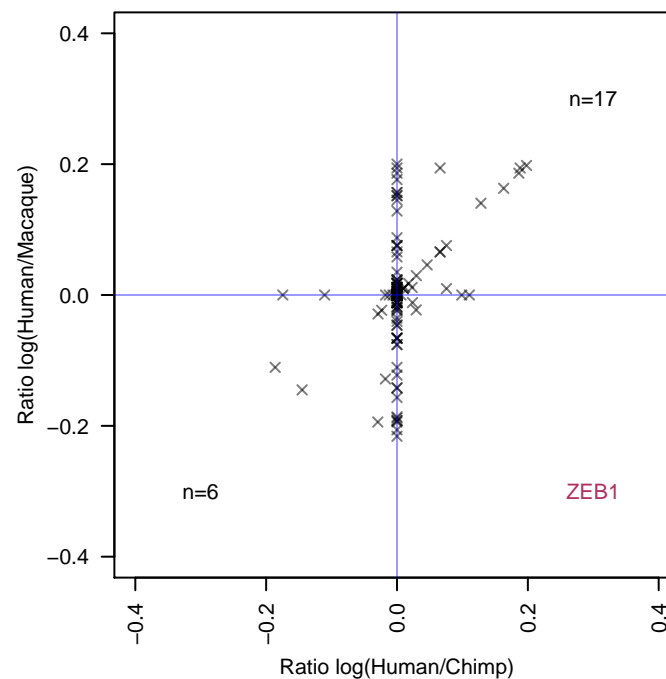

commonFibroblast.final.bed

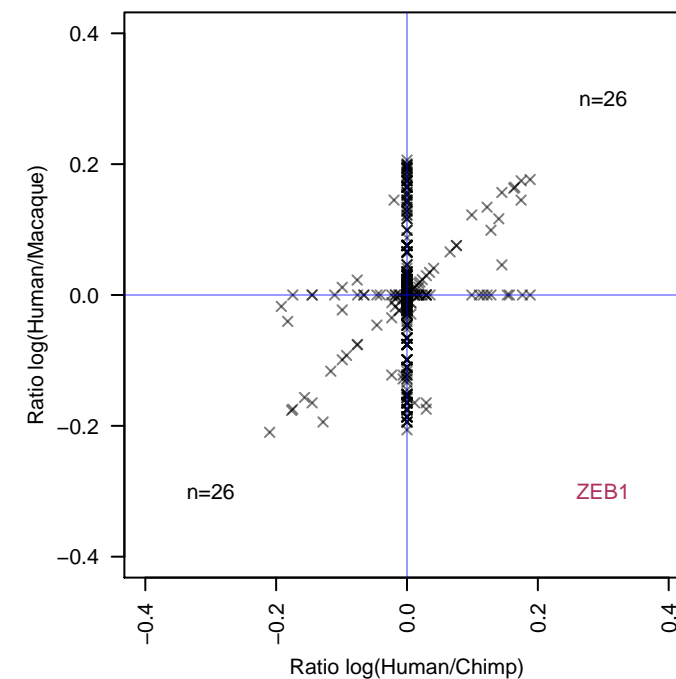

ChimpUpFibroblast.final.bed

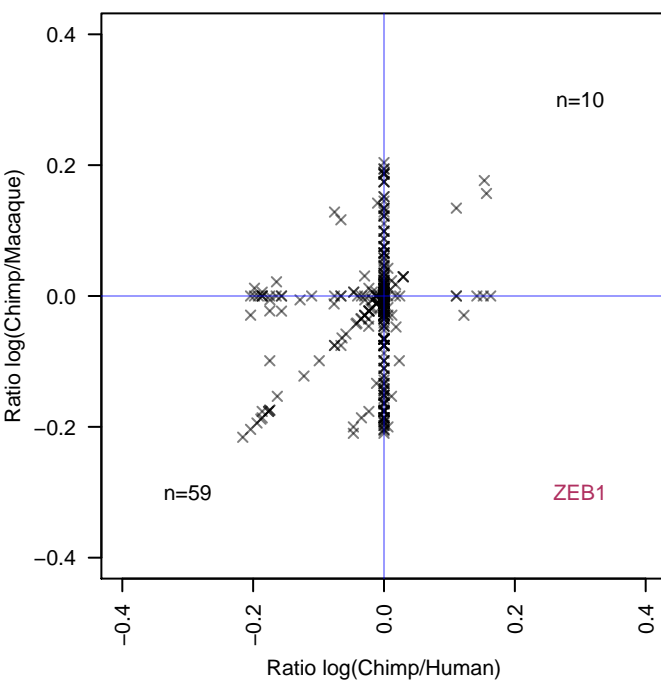

ChimpDownFibroblast.final.bed

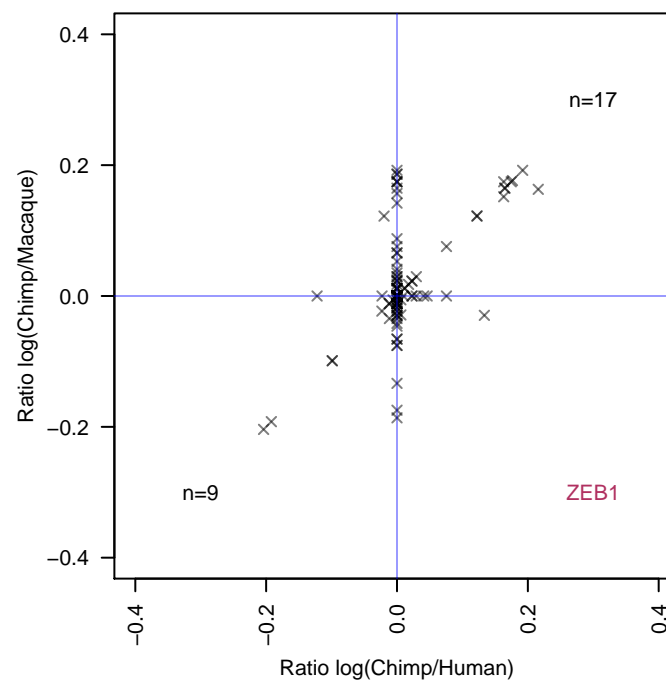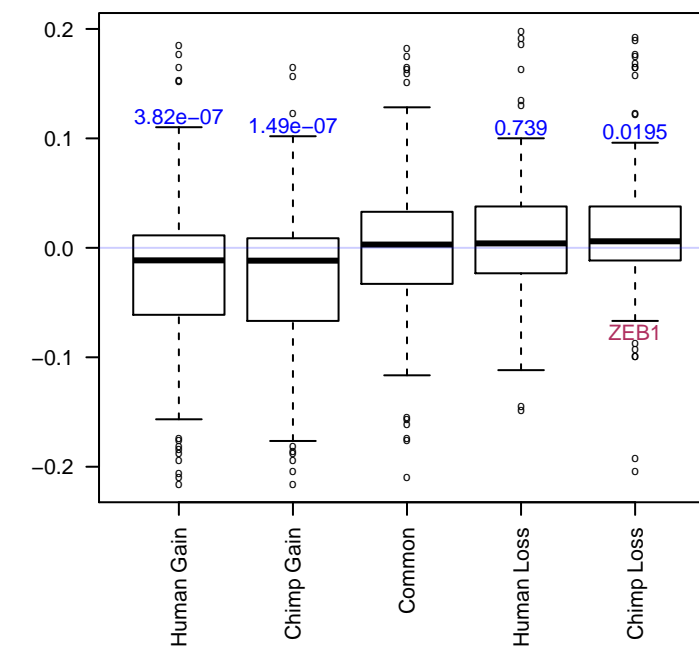

HumanUpFibroblast.final.bed

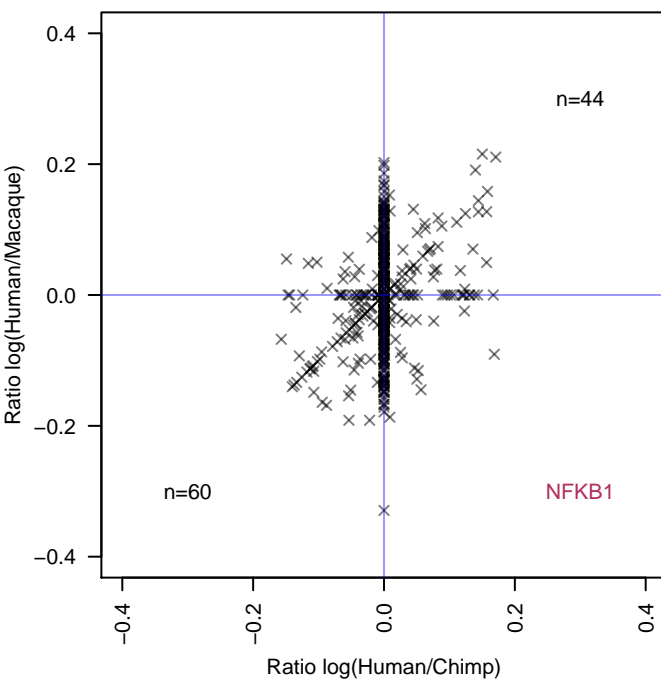

HumanDownFibroblast.final.bed

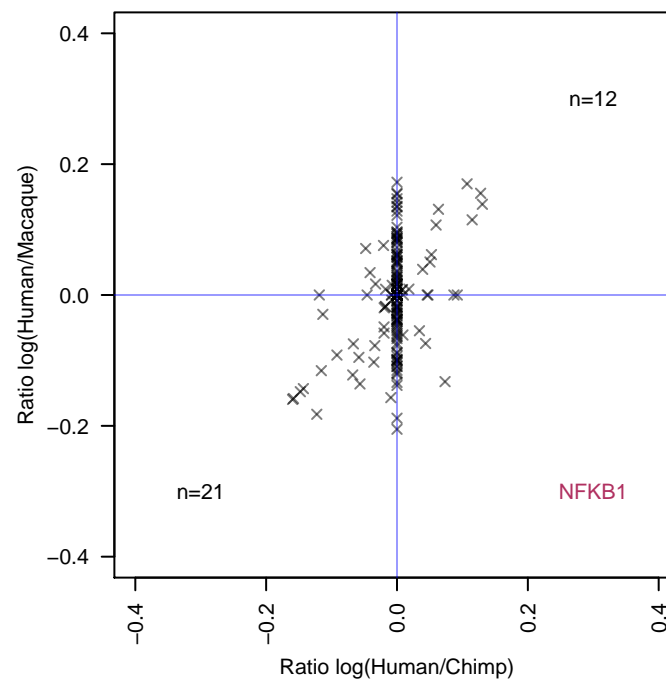

commonFibroblast.final.bed

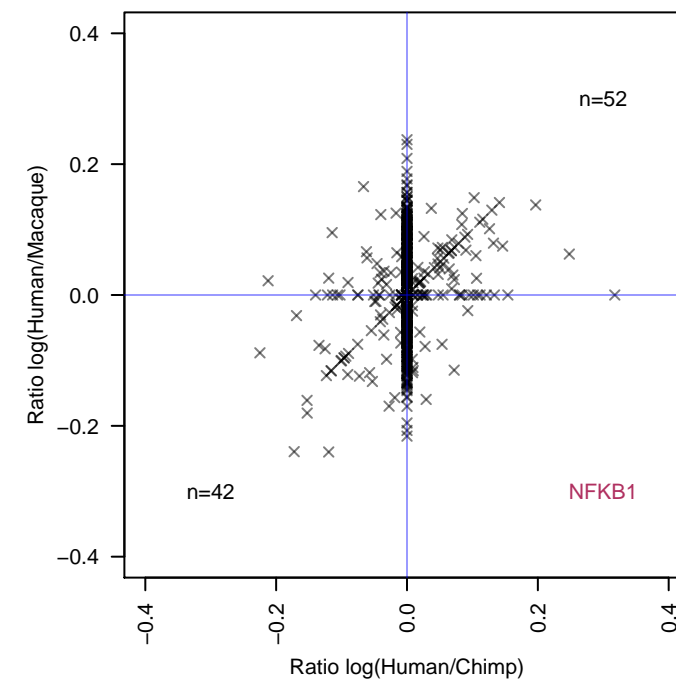

ChimpUpFibroblast.final.bed

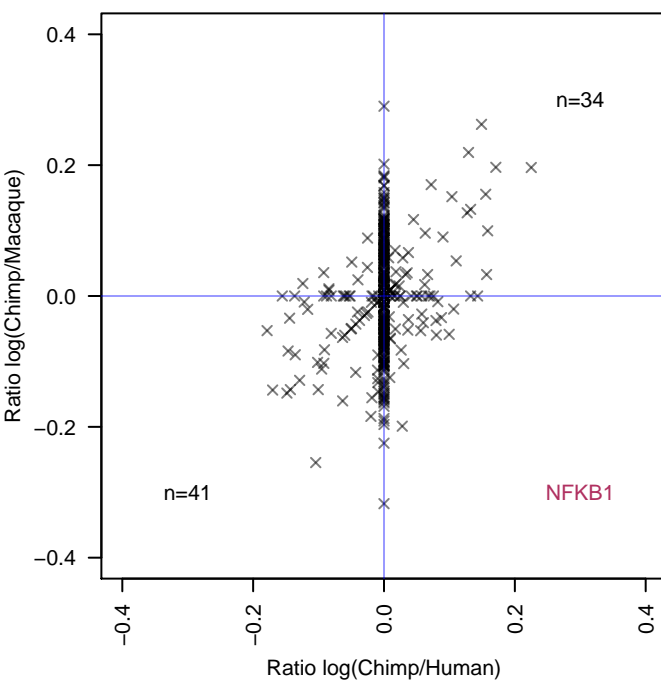

ChimpDownFibroblast.final.bed

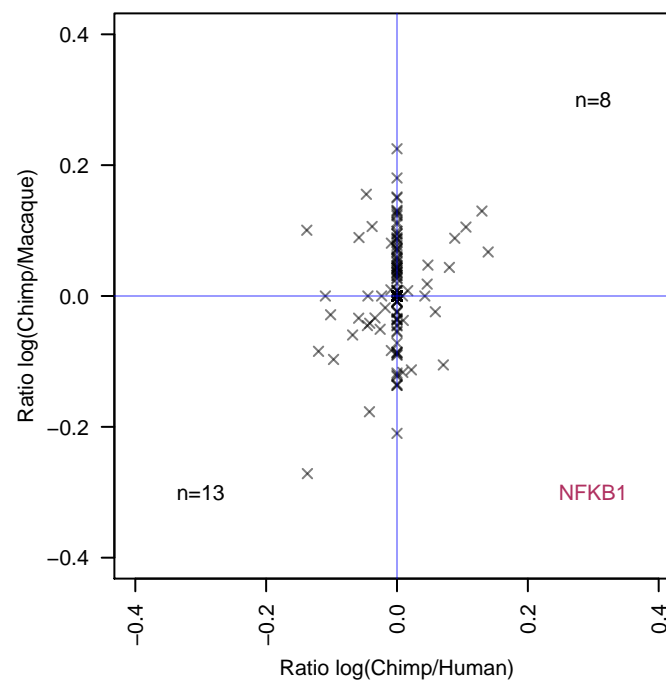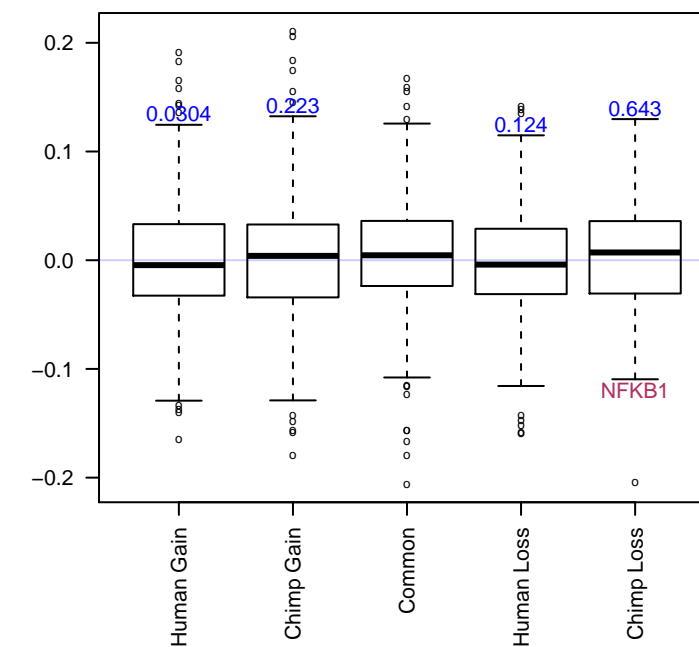

67

HumanUpFibroblast.final.bed

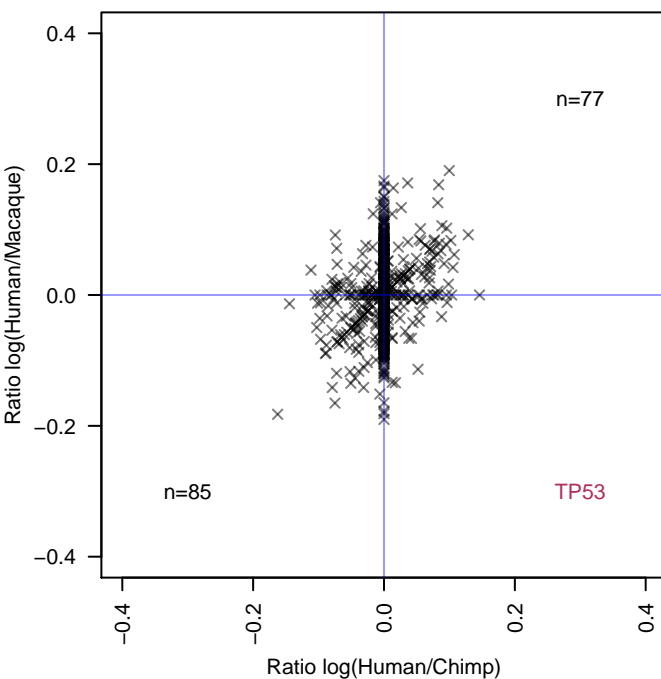

HumanDownFibroblast.final.bed

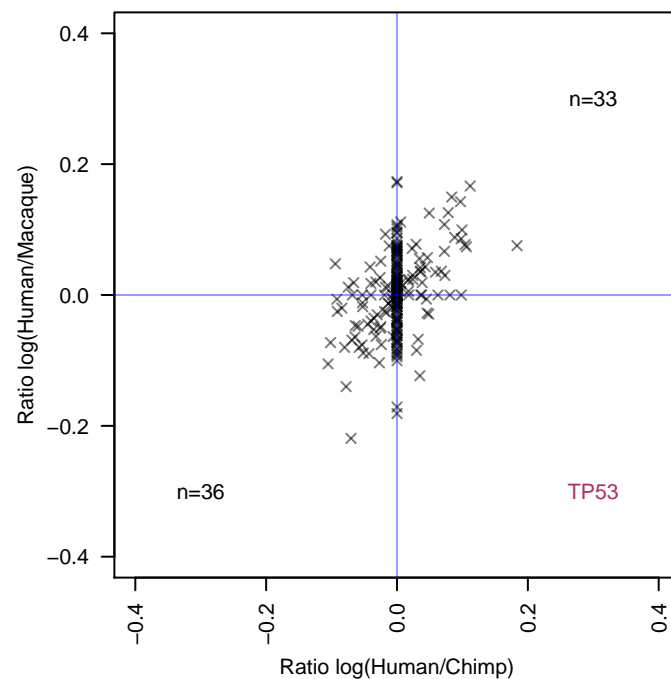

commonFibroblast.final.bed

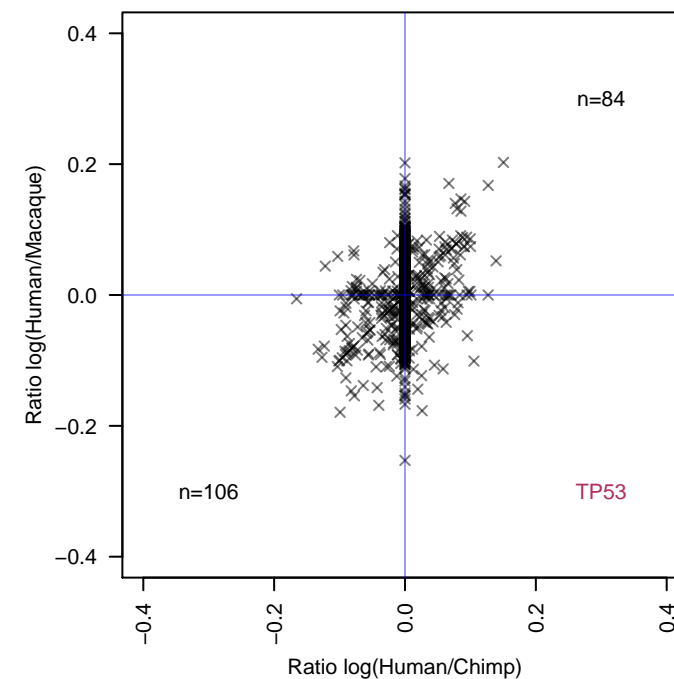

ChimpUpFibroblast.final.bed

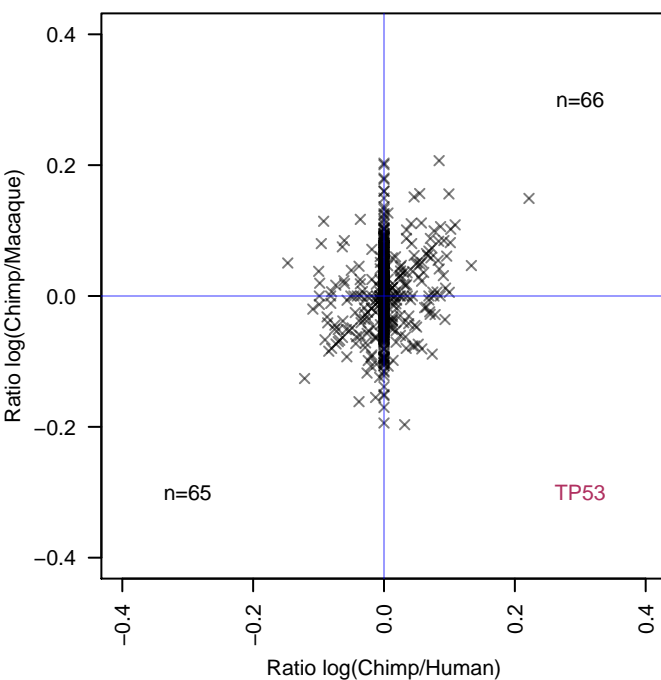

ChimpDownFibroblast.final.bed

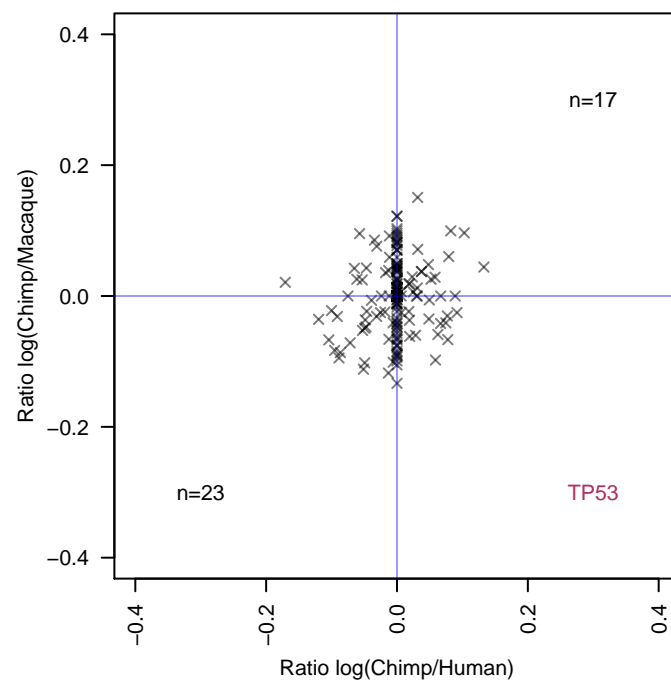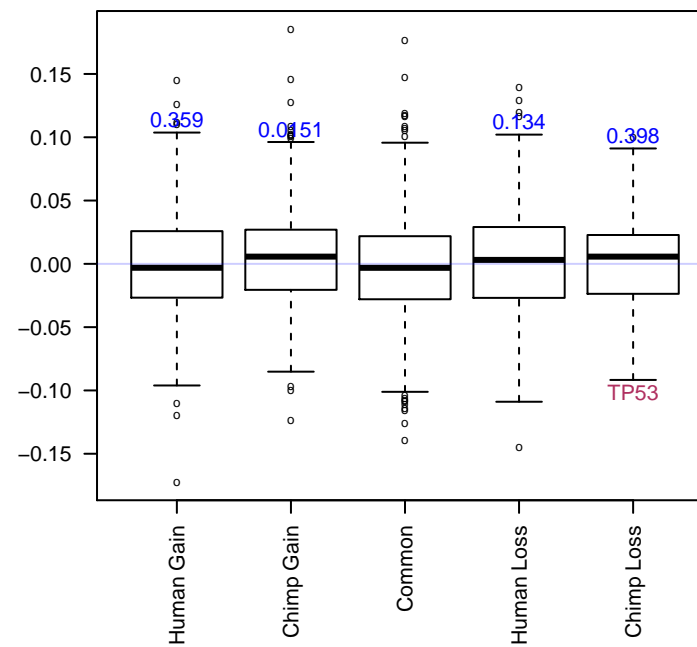

68

HumanUpFibroblast.final.bed

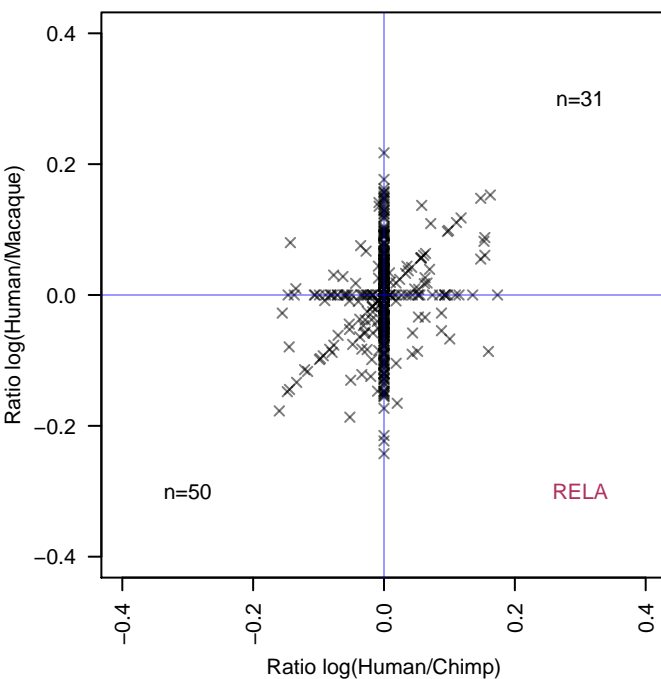

HumanDownFibroblast.final.bed

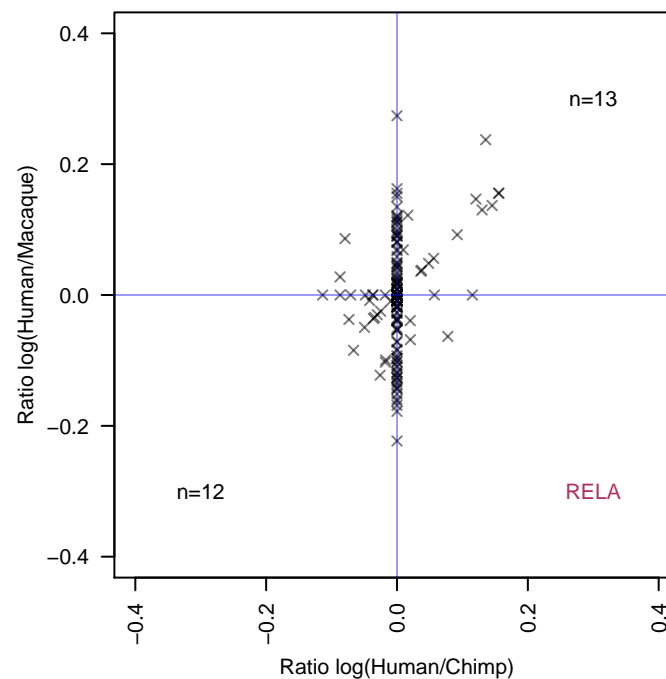

commonFibroblast.final.bed

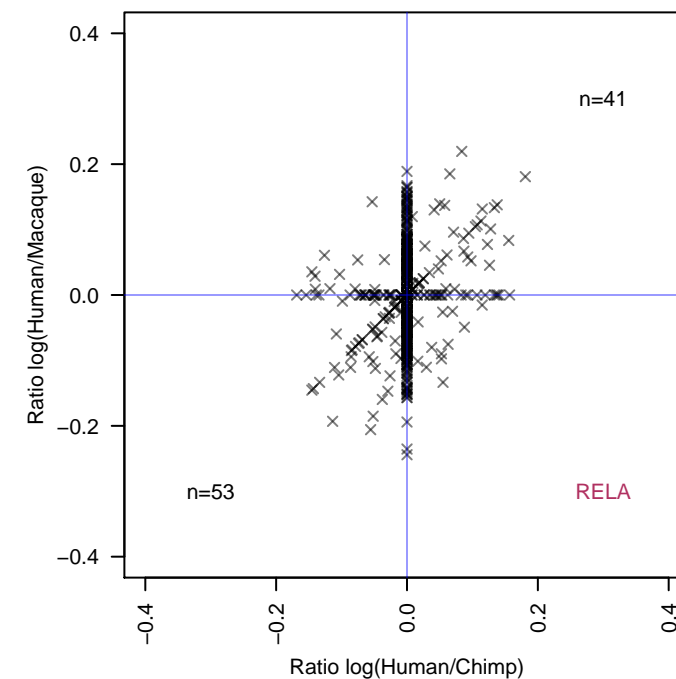

ChimpUpFibroblast.final.bed

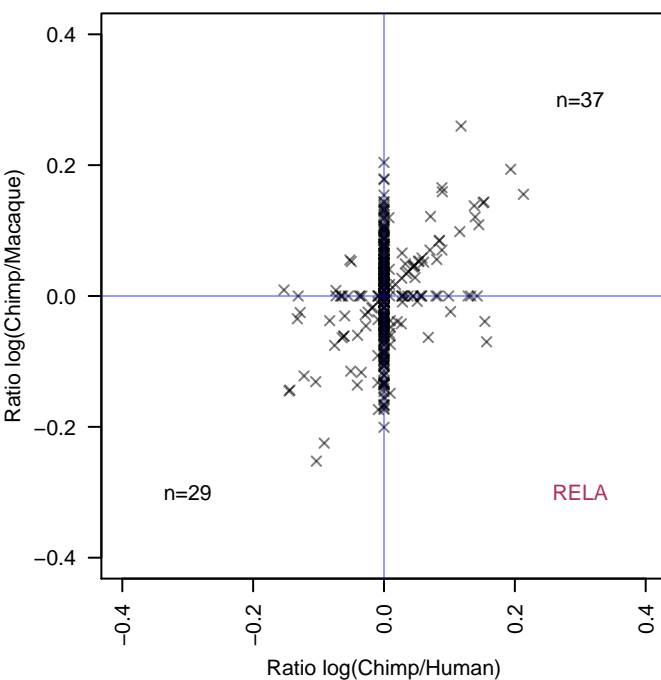

ChimpDownFibroblast.final.bed

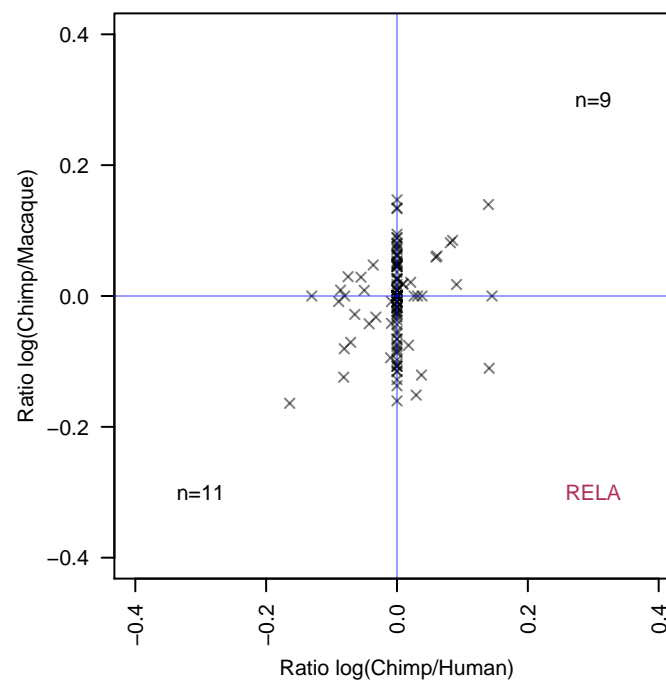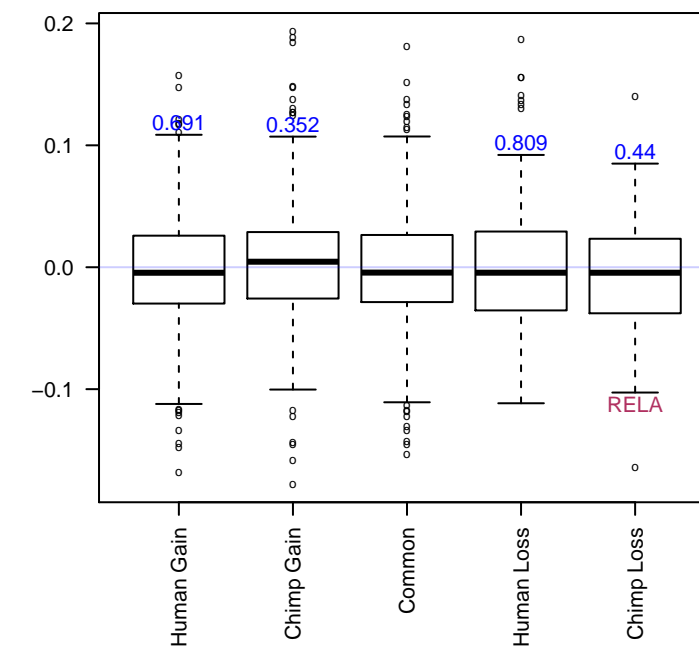

69

HumanUpFibroblast.final.bed

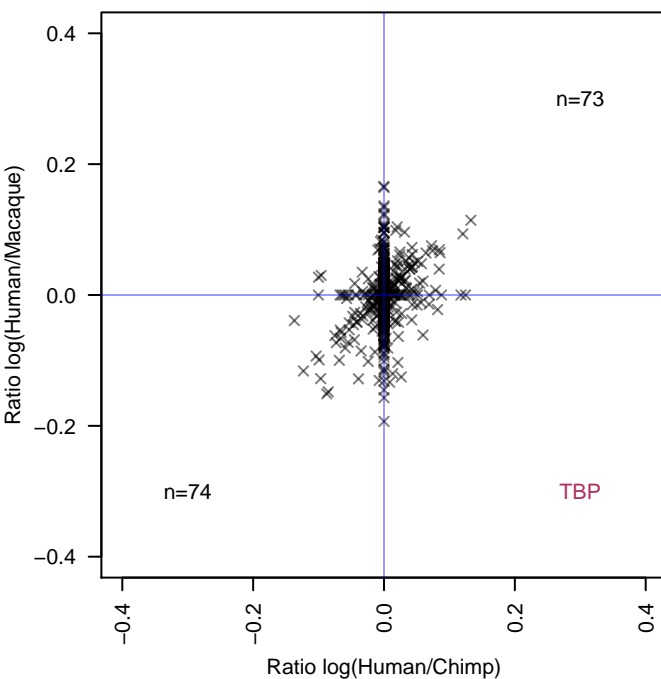

HumanDownFibroblast.final.bed

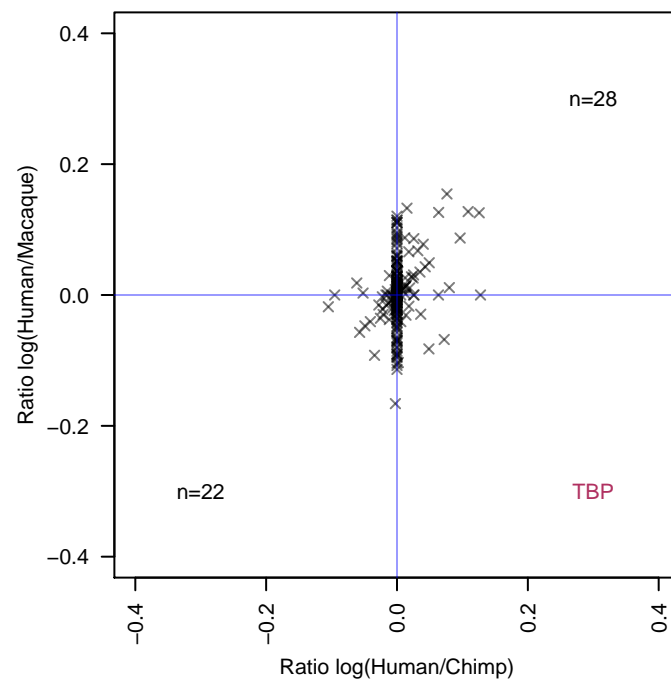

commonFibroblast.final.bed

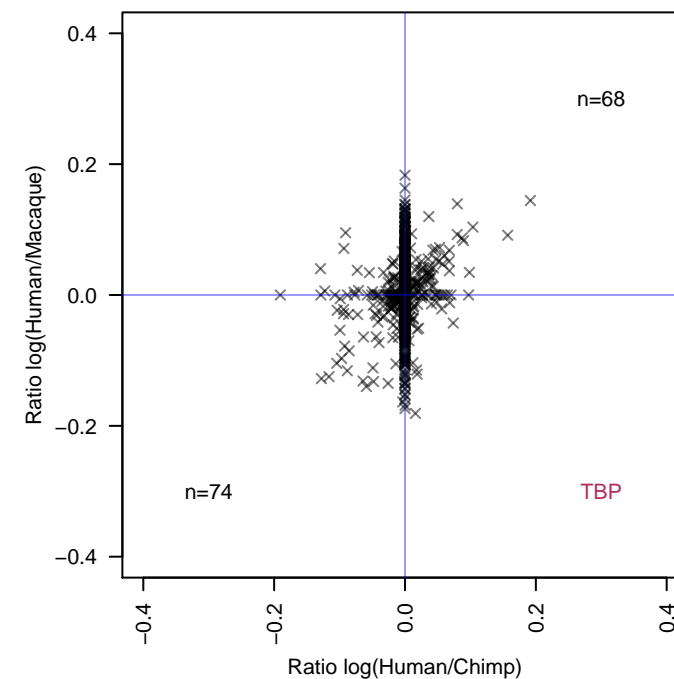

ChimpUpFibroblast.final.bed

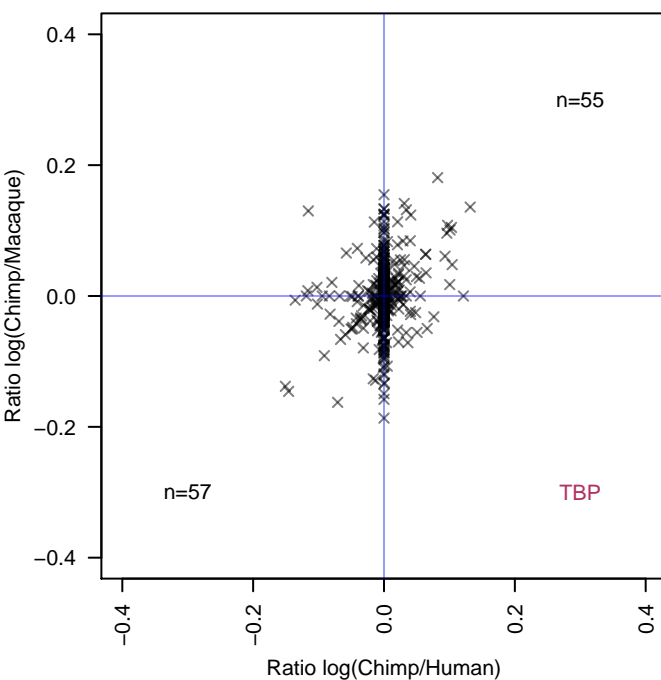

ChimpDownFibroblast.final.bed

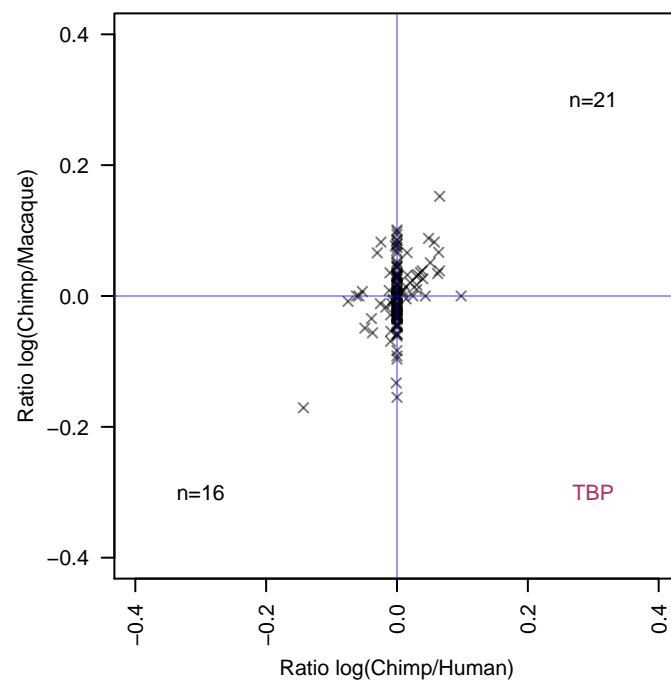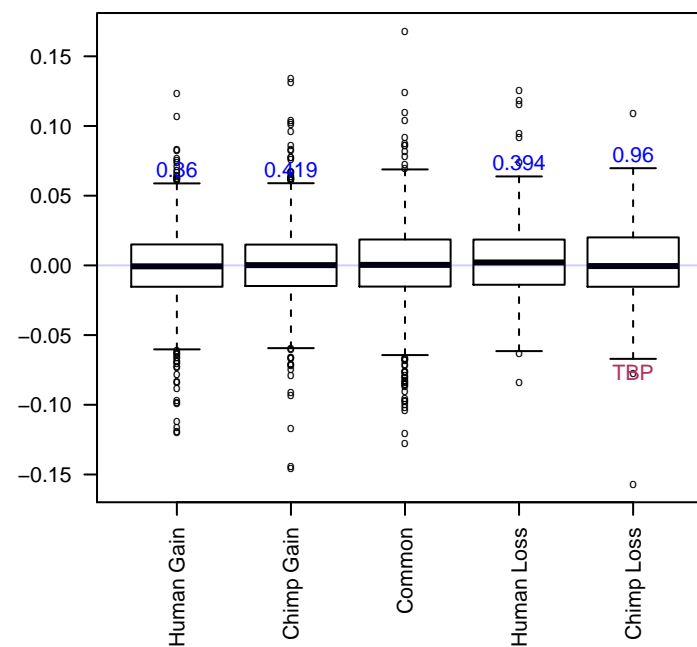

70

HumanUpFibroblast.final.bed

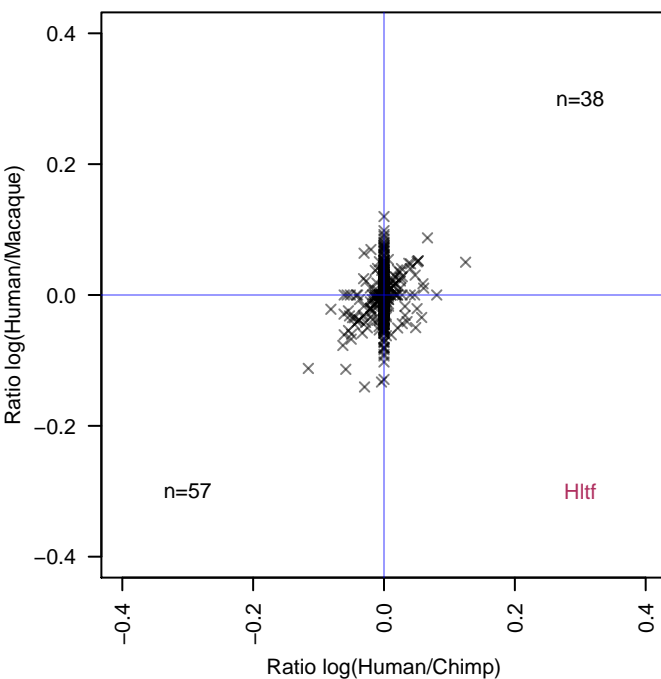

HumanDownFibroblast.final.bed

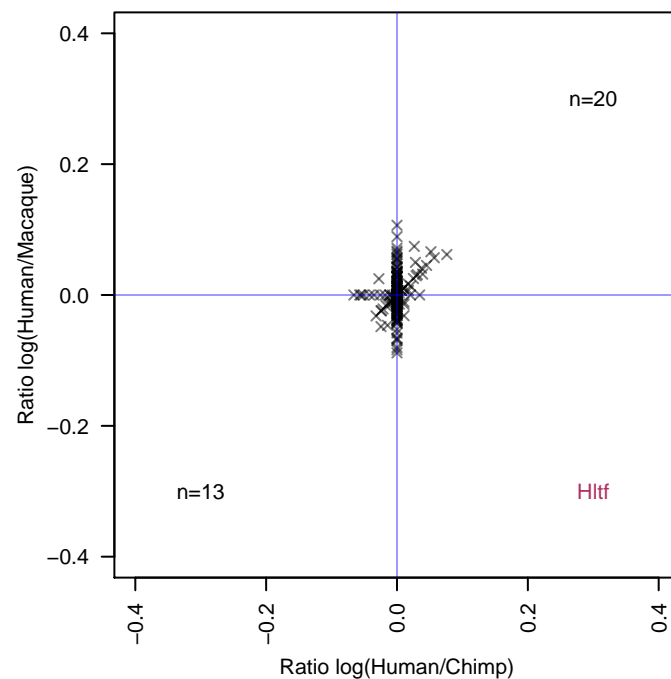

commonFibroblast.final.bed

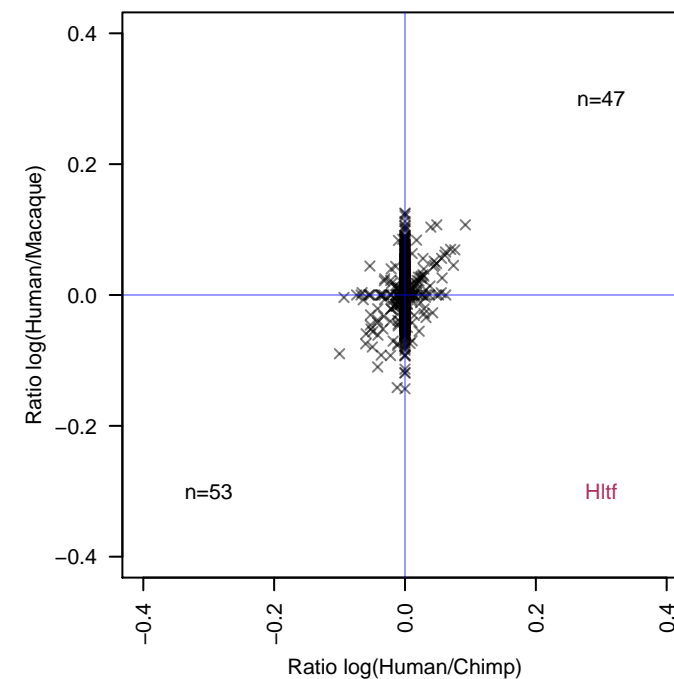

ChimpUpFibroblast.final.bed

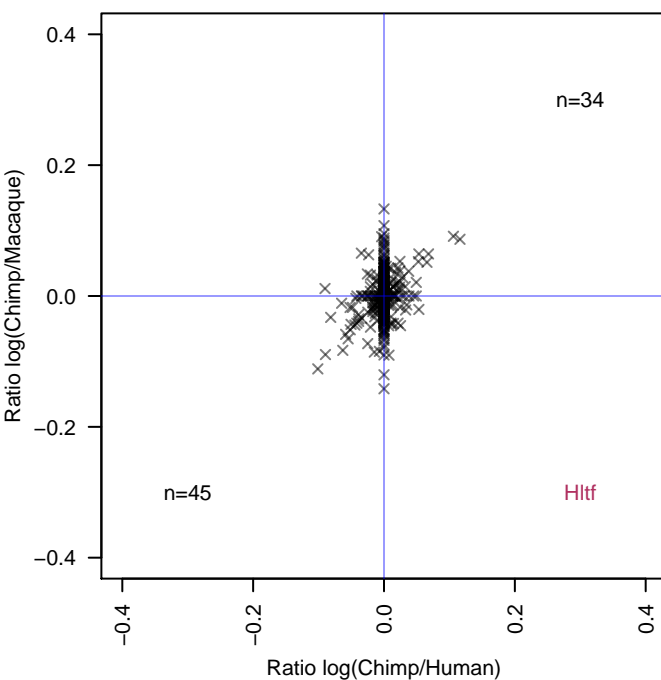

ChimpDownFibroblast.final.bed

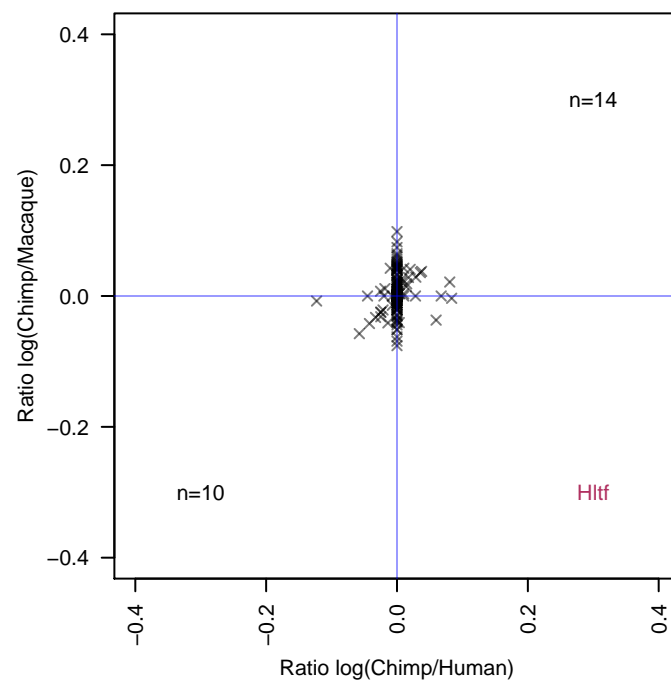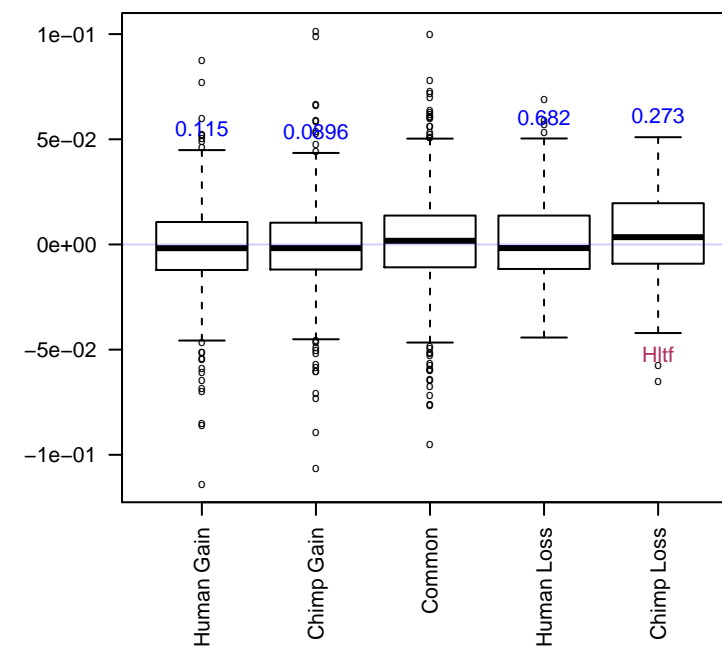

71

HumanUpFibroblast.final.bed

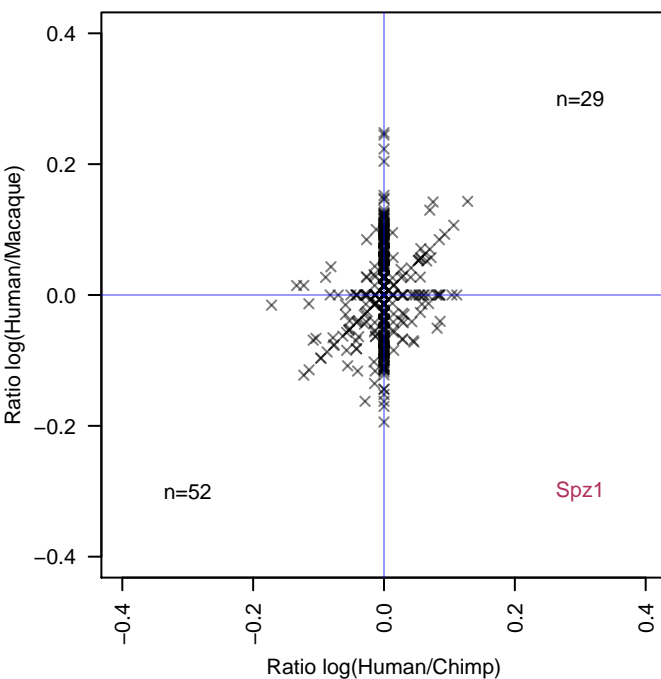

HumanDownFibroblast.final.bed

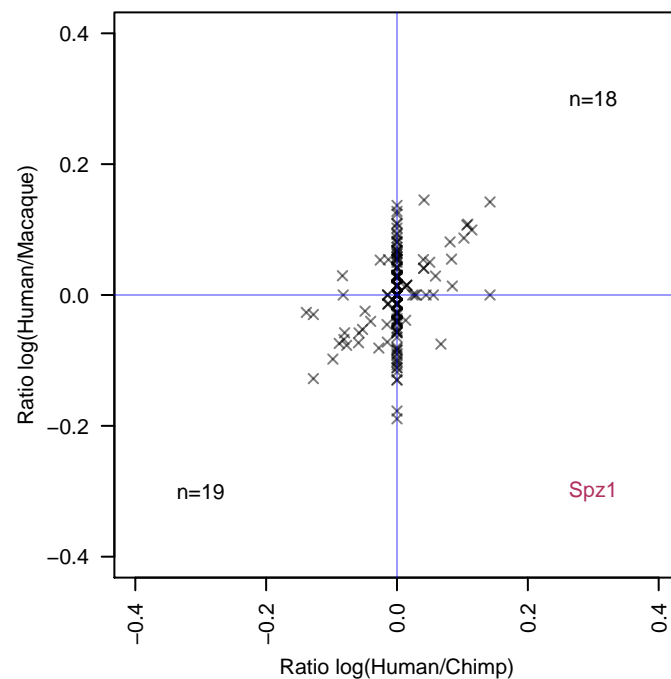

commonFibroblast.final.bed

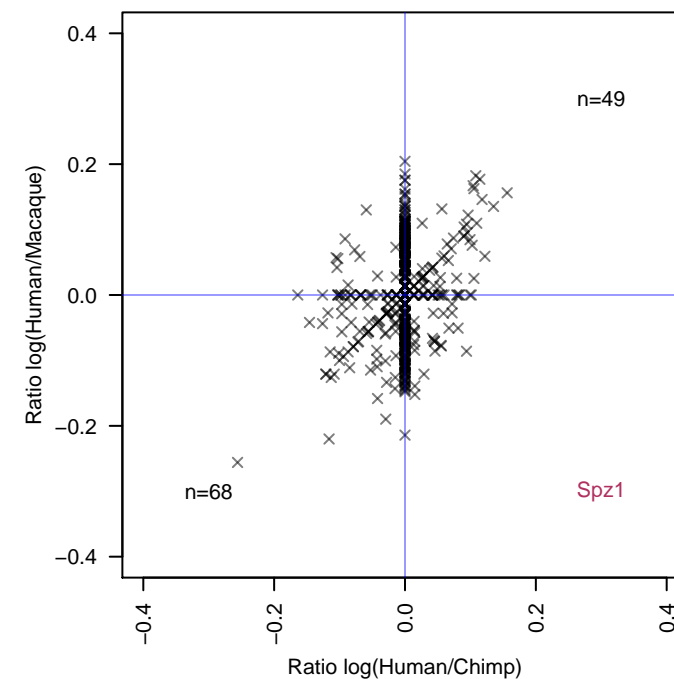

ChimpUpFibroblast.final.bed

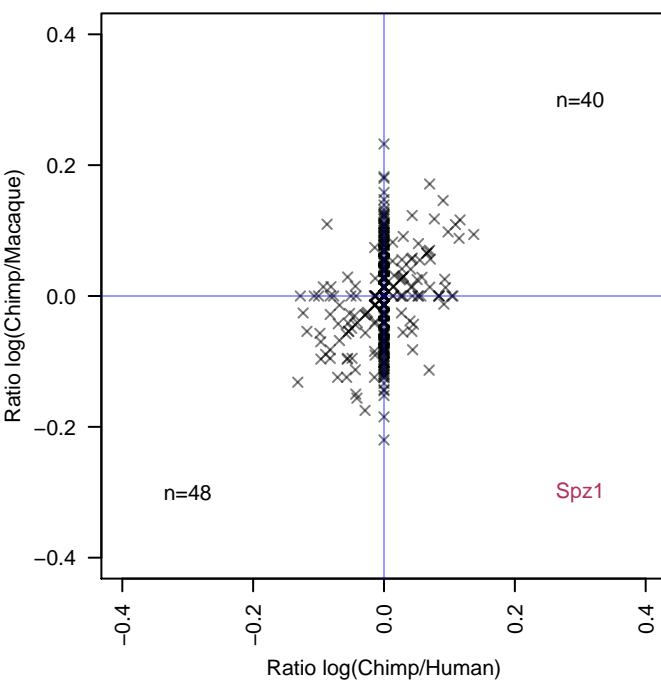

ChimpDownFibroblast.final.bed

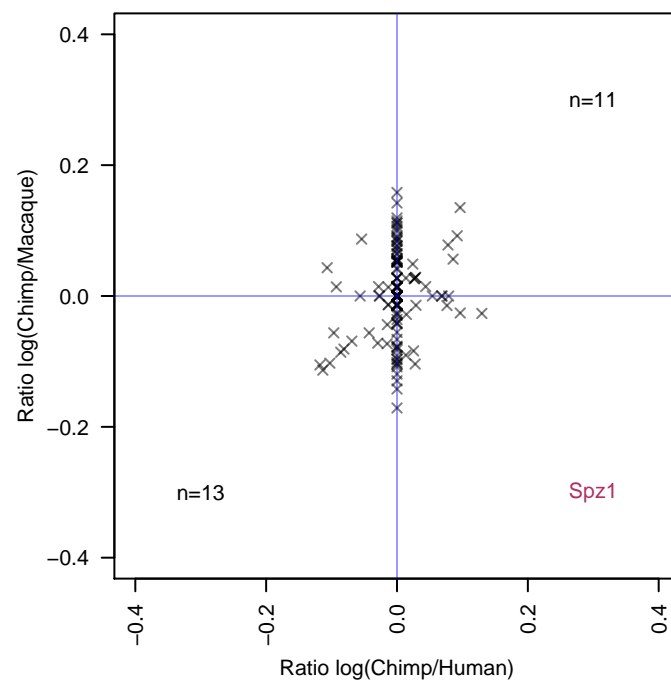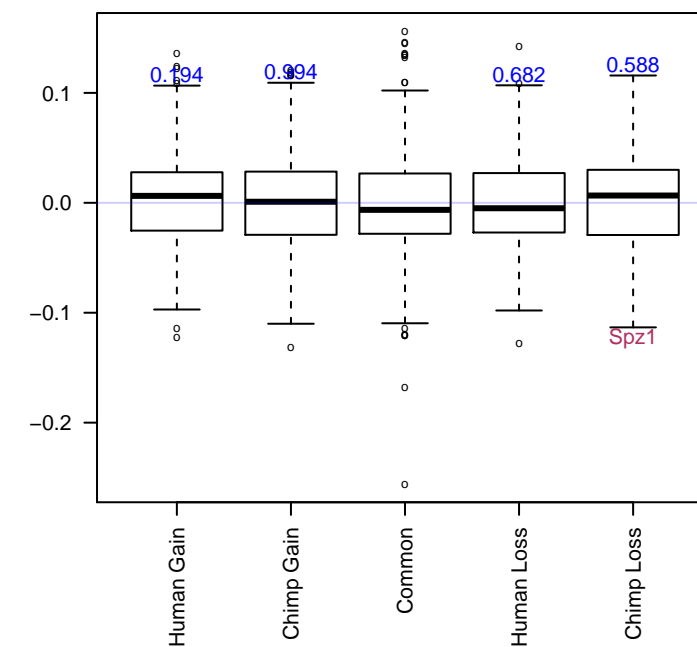

72

HumanUpFibroblast.final.bed

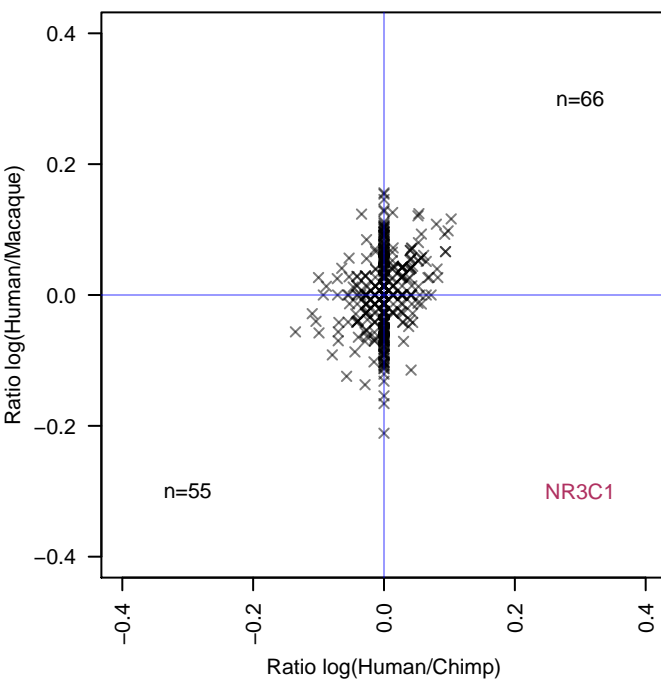

HumanDownFibroblast.final.bed

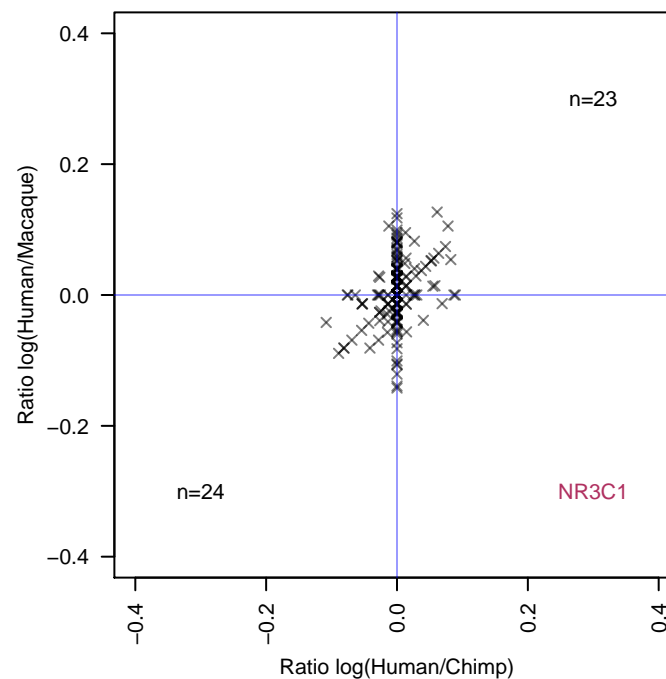

commonFibroblast.final.bed

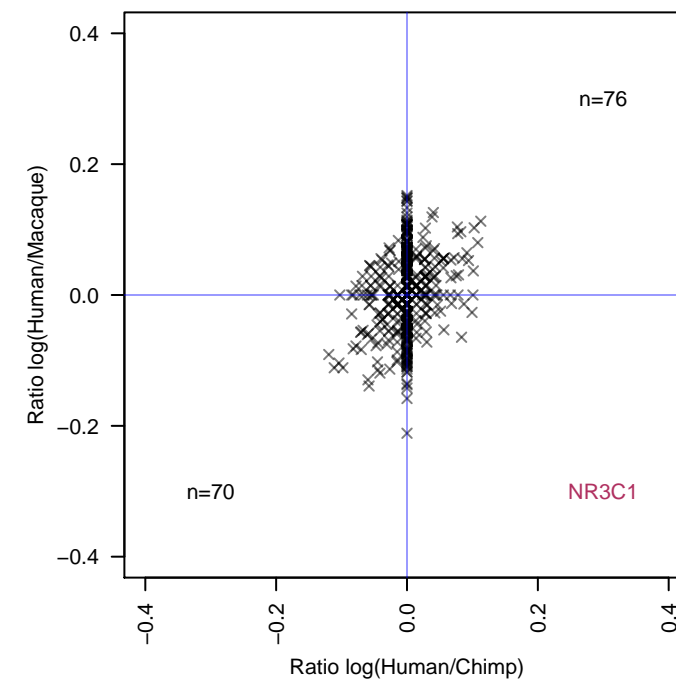

ChimpUpFibroblast.final.bed

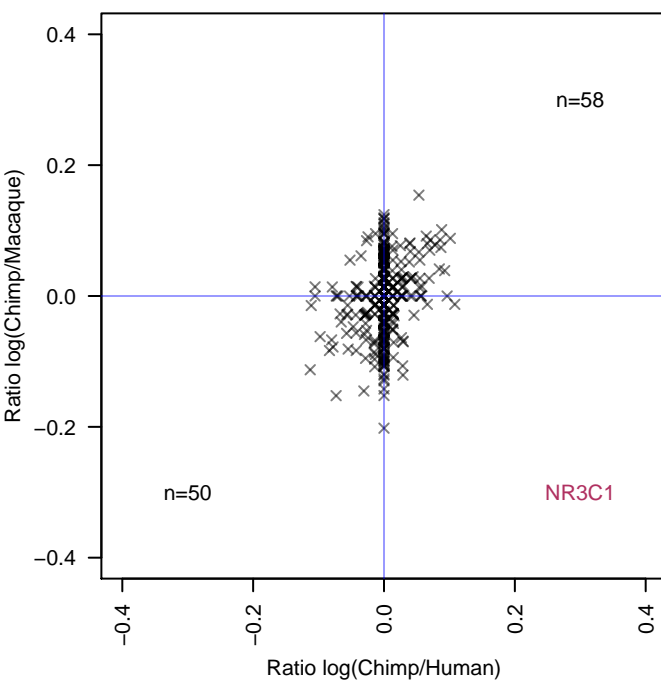

ChimpDownFibroblast.final.bed

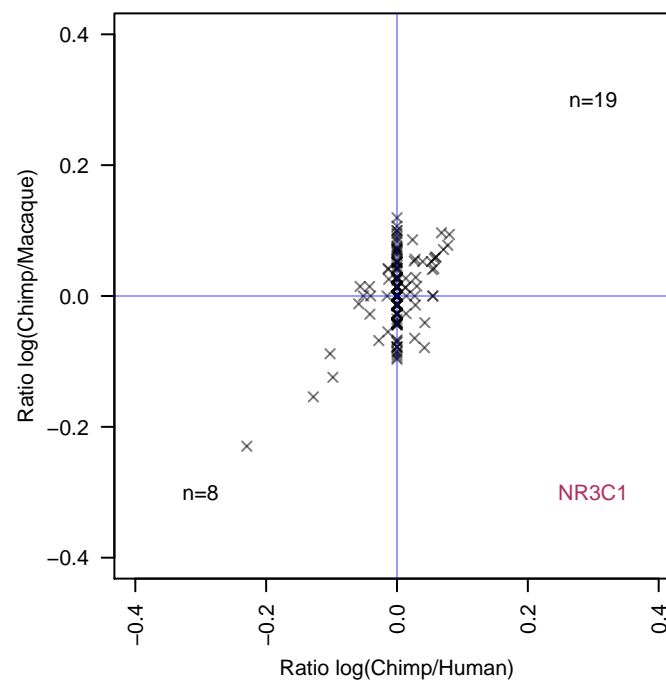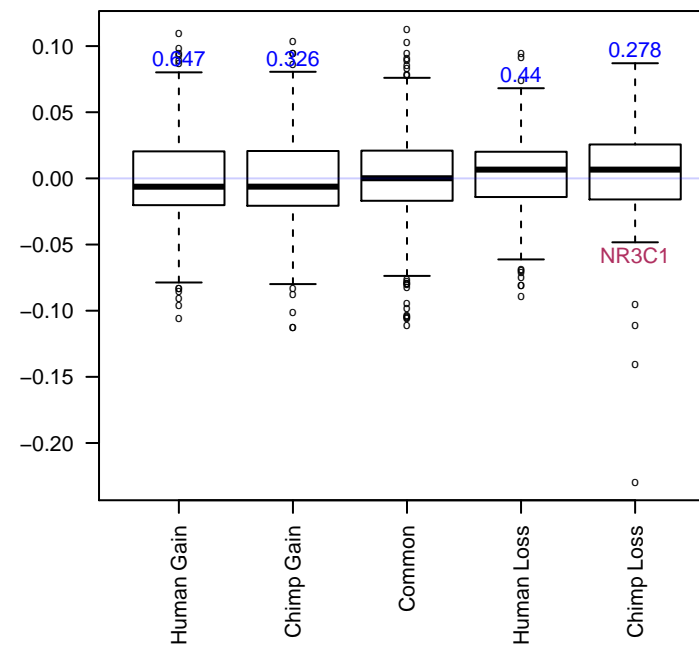

73

HumanUpFibroblast.final.bed

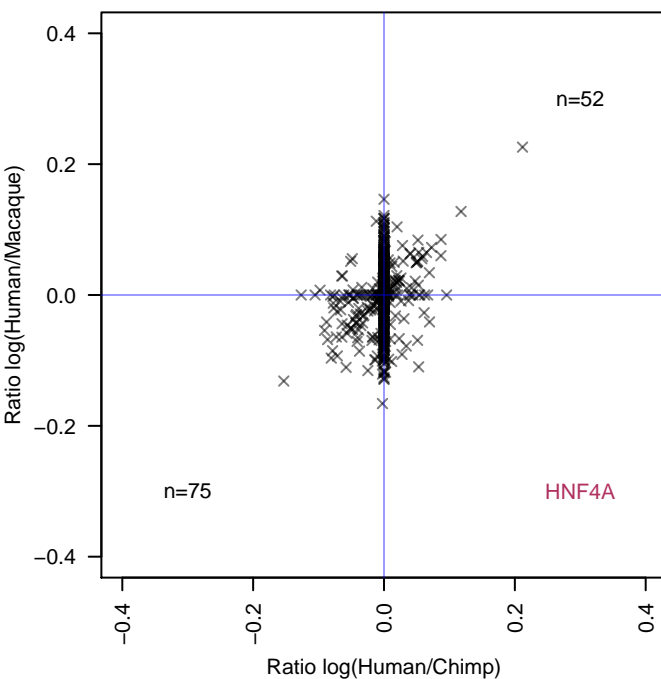

HumanDownFibroblast.final.bed

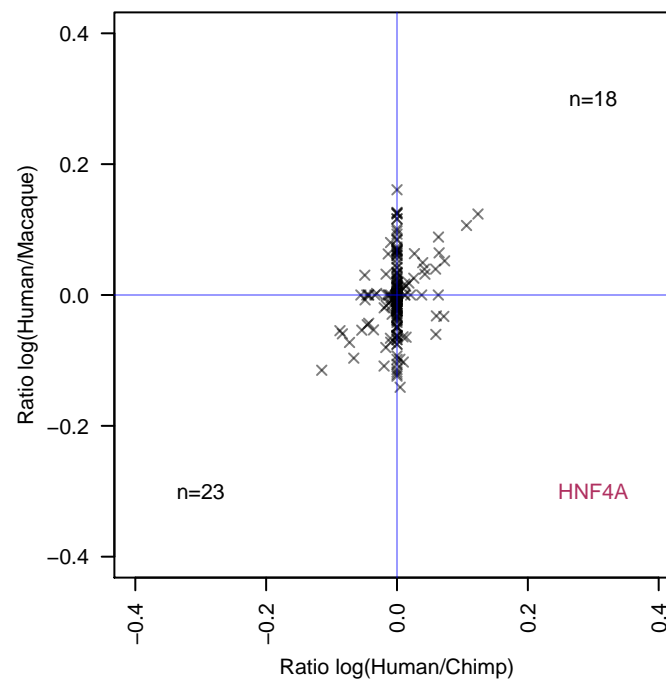

commonFibroblast.final.bed

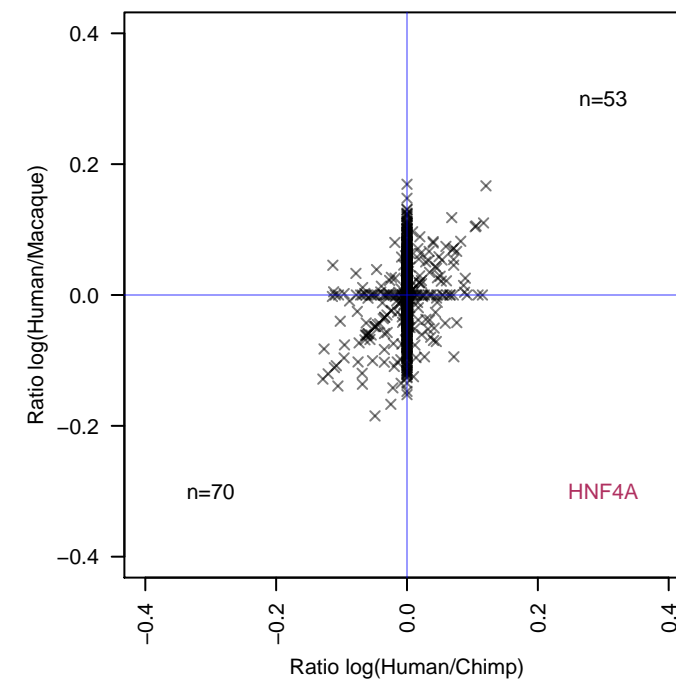

ChimpUpFibroblast.final.bed

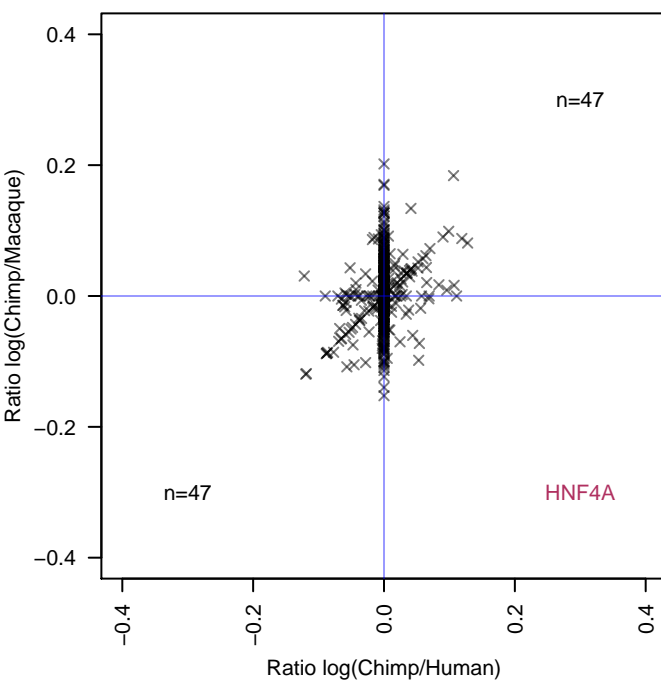

ChimpDownFibroblast.final.bed

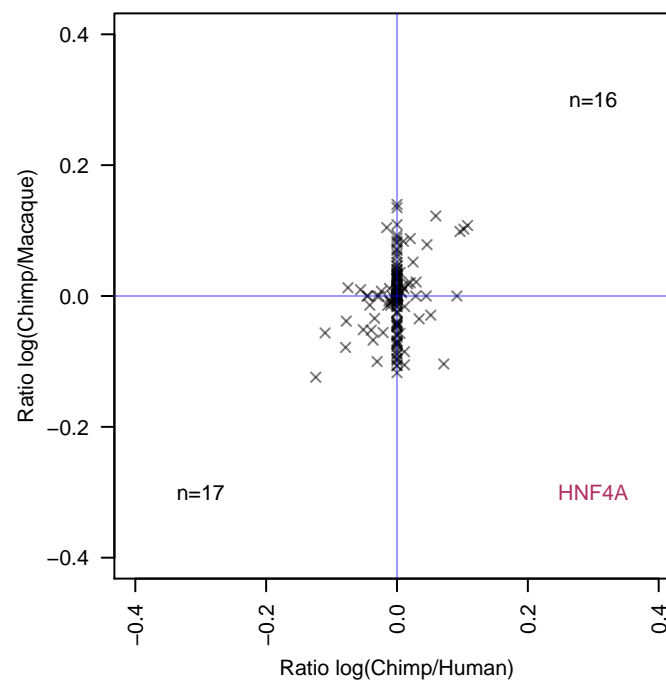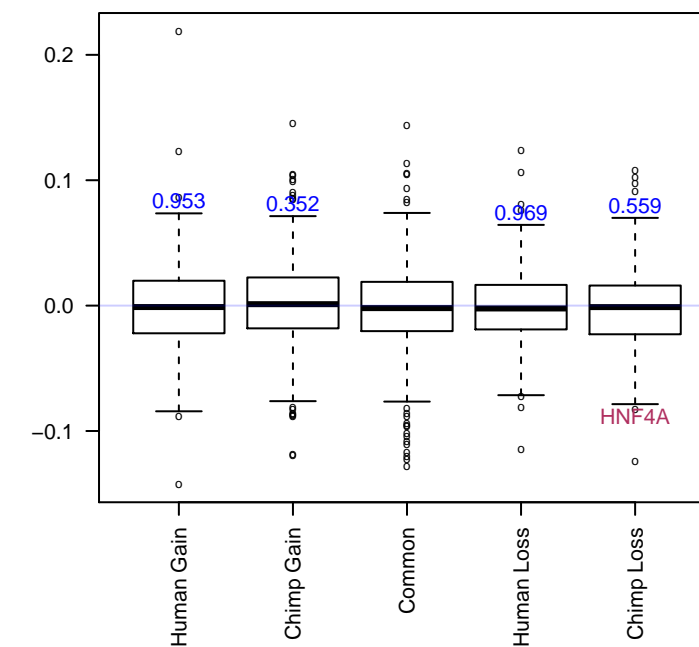

74

HumanUpFibroblast.final.bed

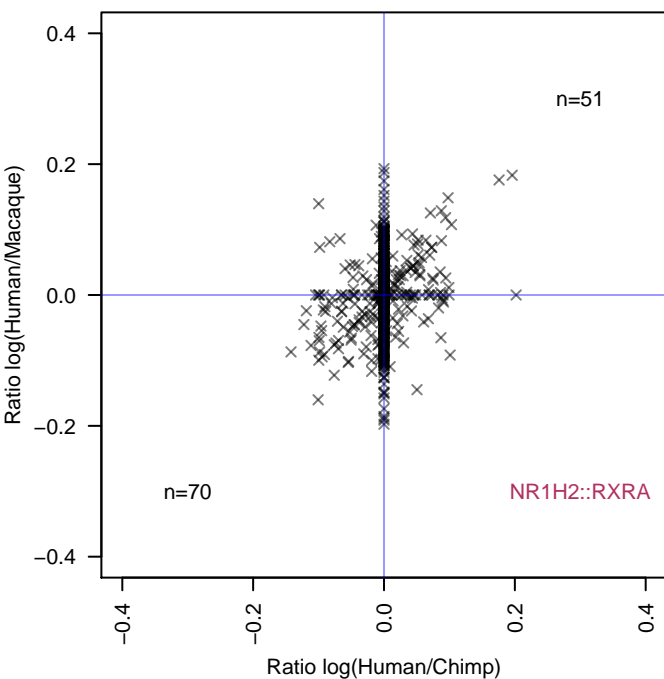

HumanDownFibroblast.final.bed

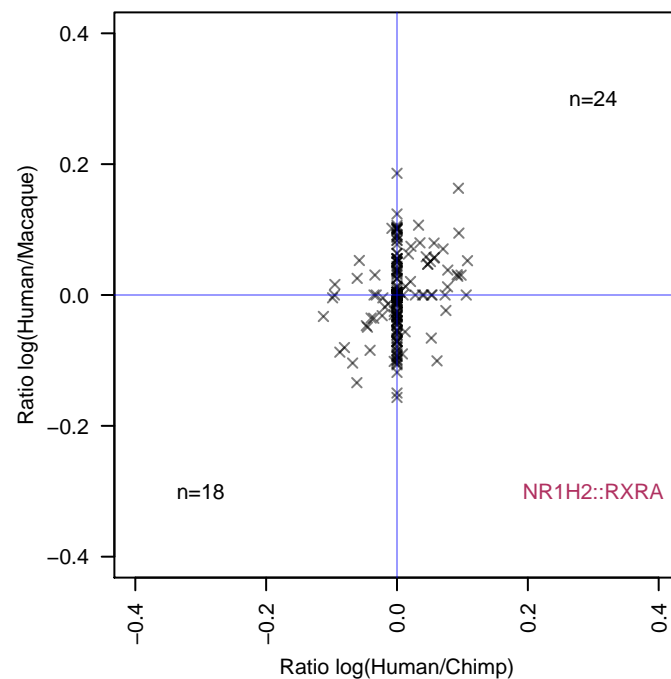

commonFibroblast.final.bed

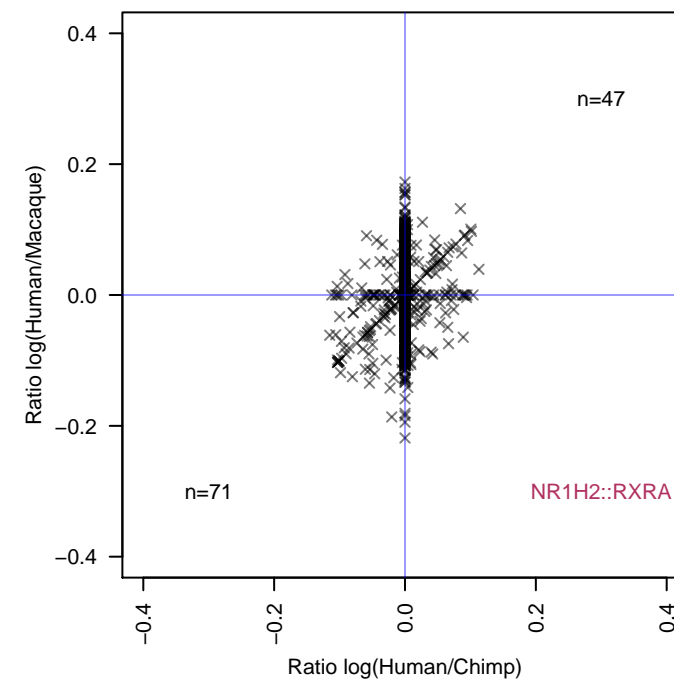

ChimpUpFibroblast.final.bed

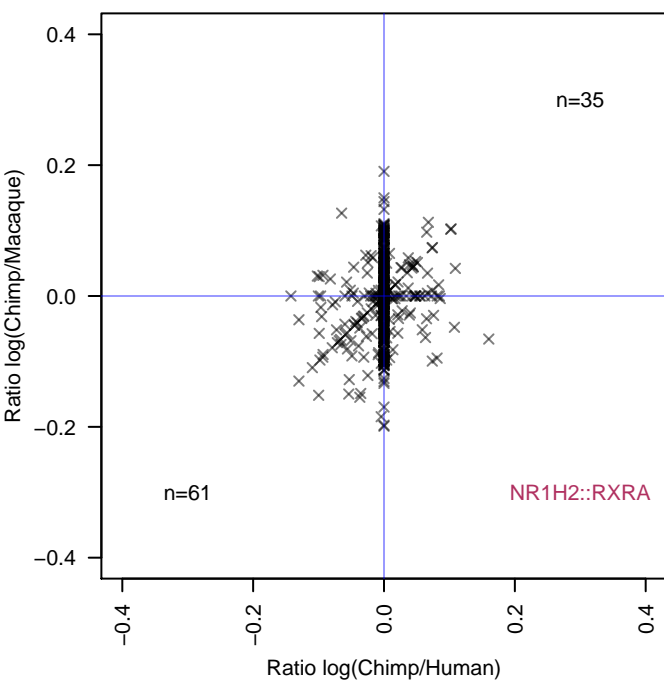

ChimpDownFibroblast.final.bed

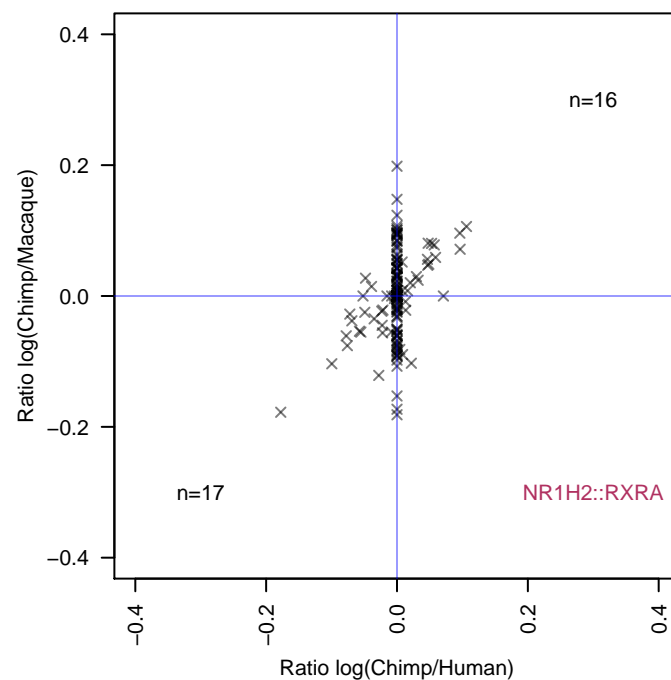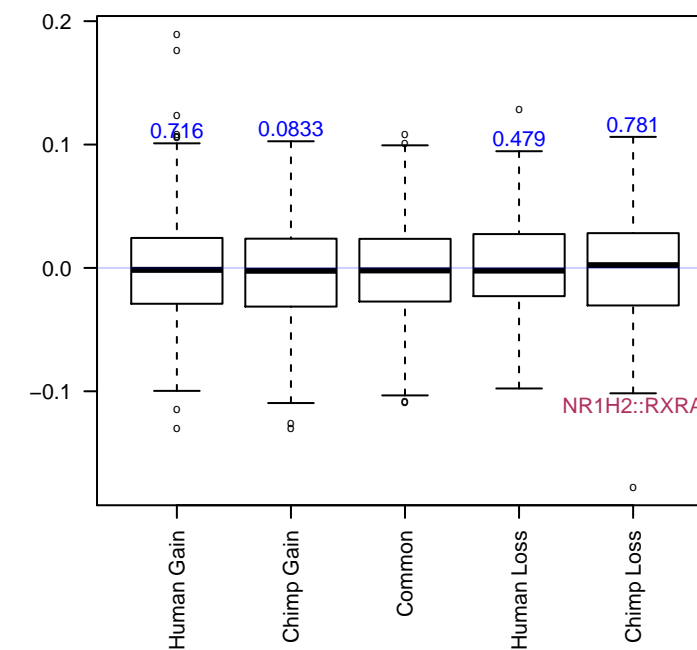

75

HumanUpFibroblast.final.bed

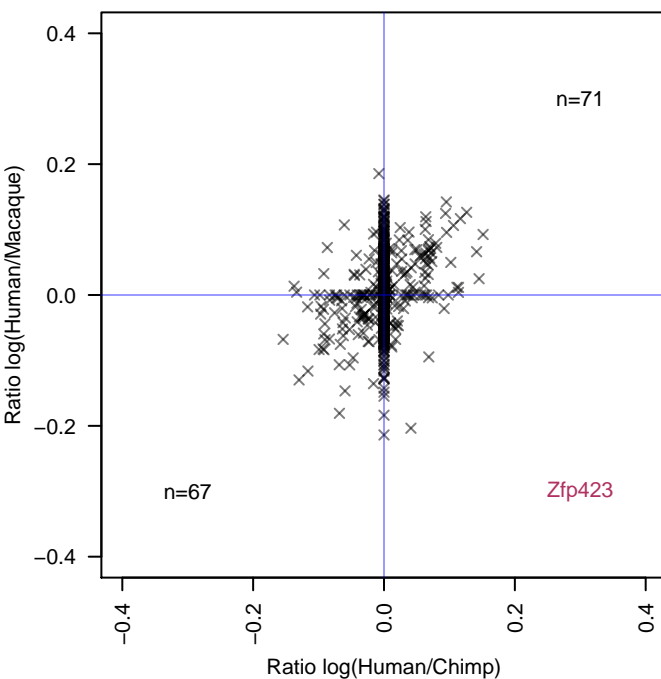

HumanDownFibroblast.final.bed

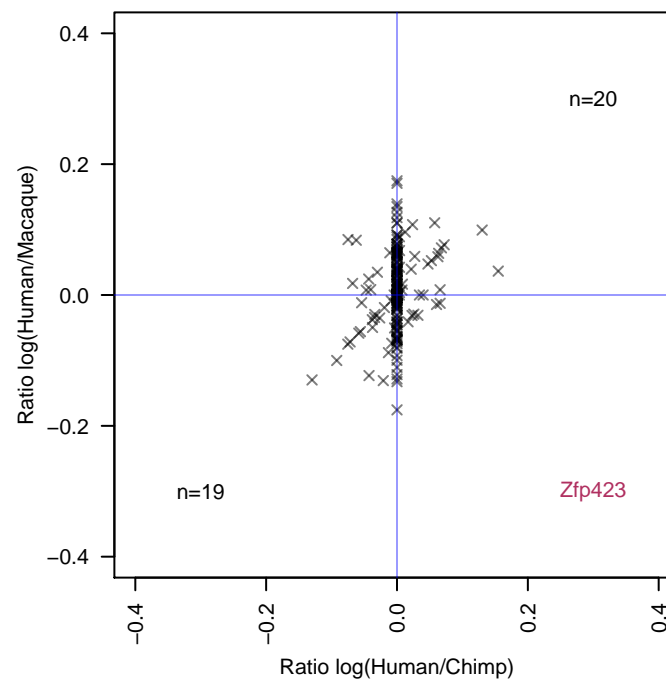

commonFibroblast.final.bed

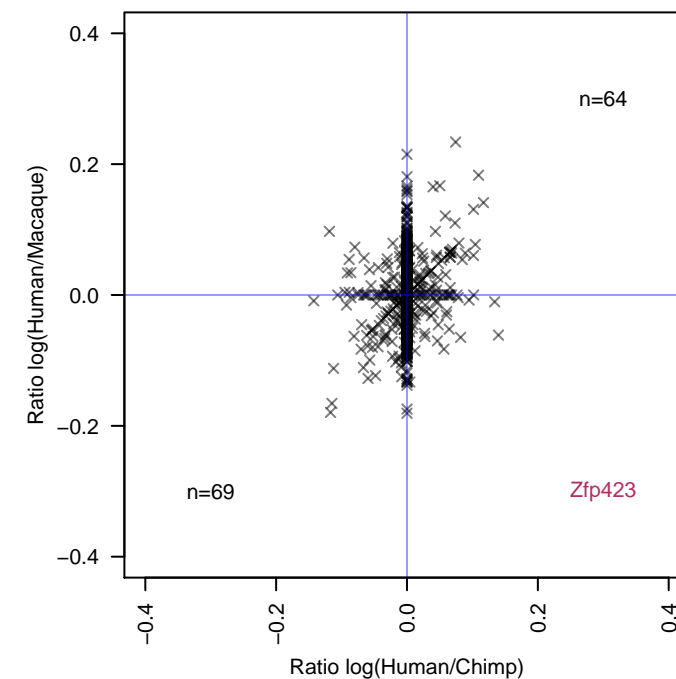

ChimpUpFibroblast.final.bed

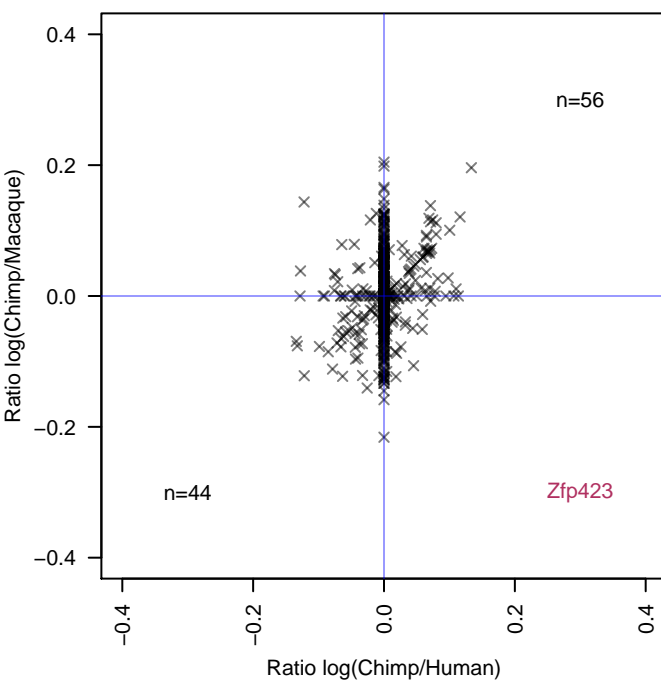

ChimpDownFibroblast.final.bed

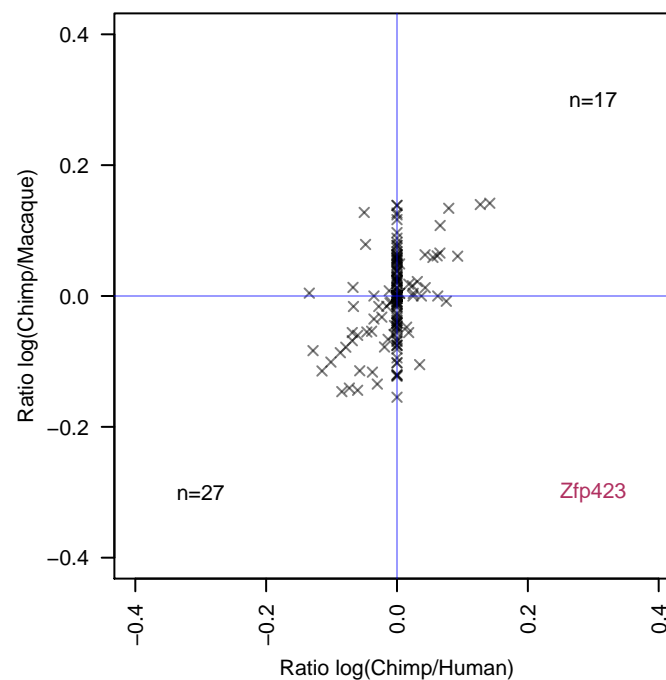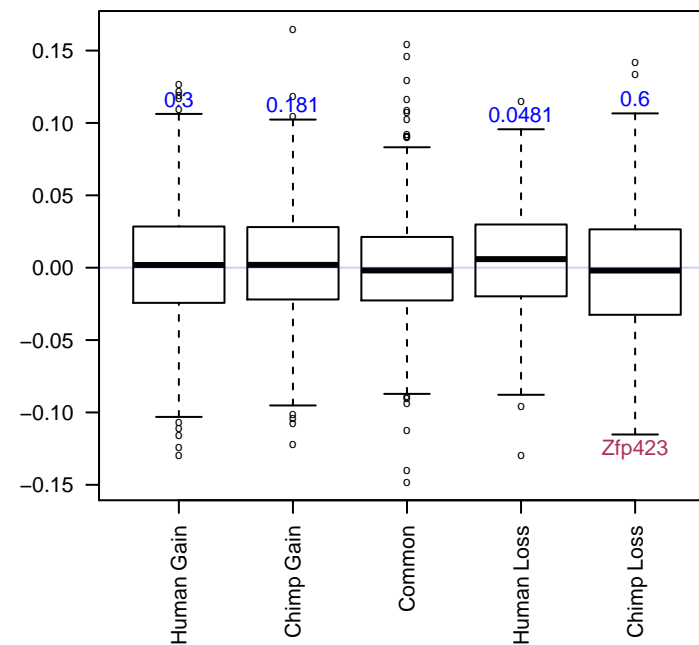

76

HumanUpFibroblast.final.bed

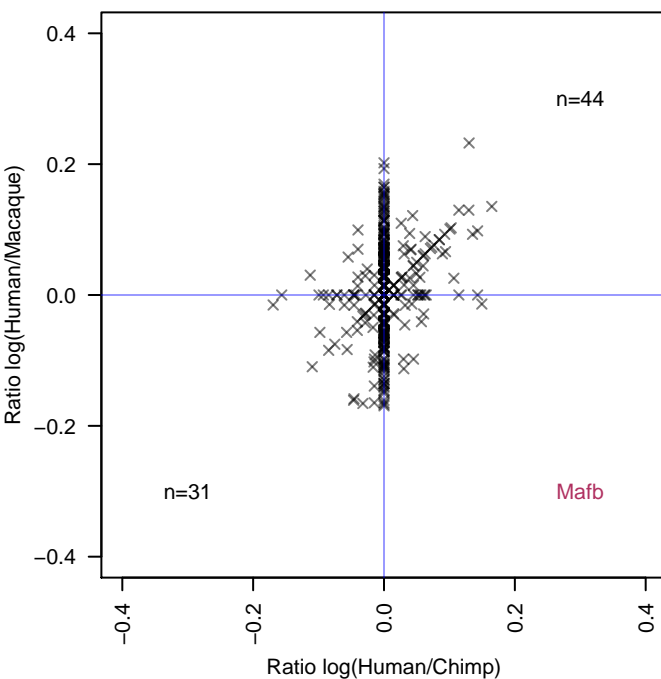

HumanDownFibroblast.final.bed

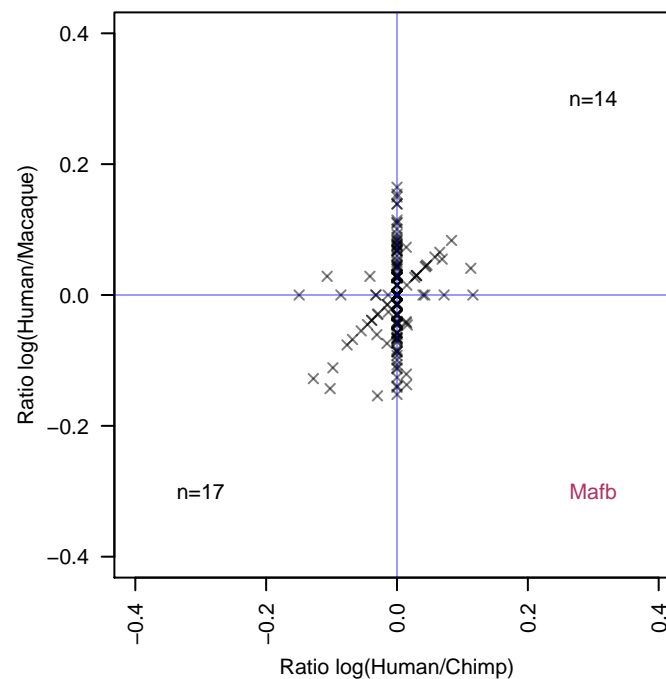

commonFibroblast.final.bed

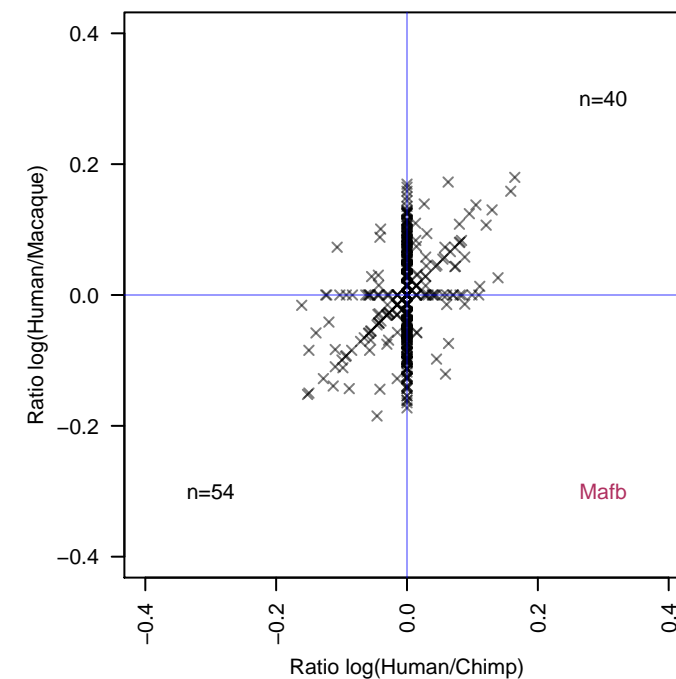

ChimpUpFibroblast.final.bed

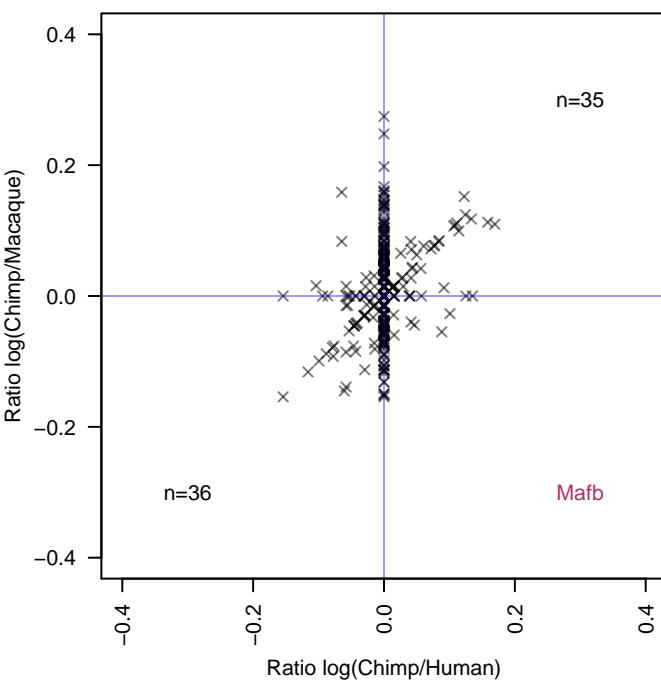

ChimpDownFibroblast.final.bed

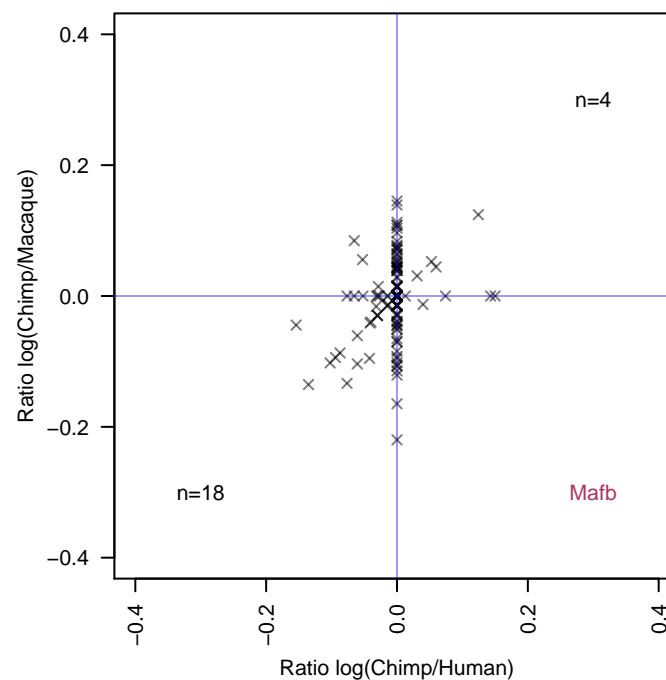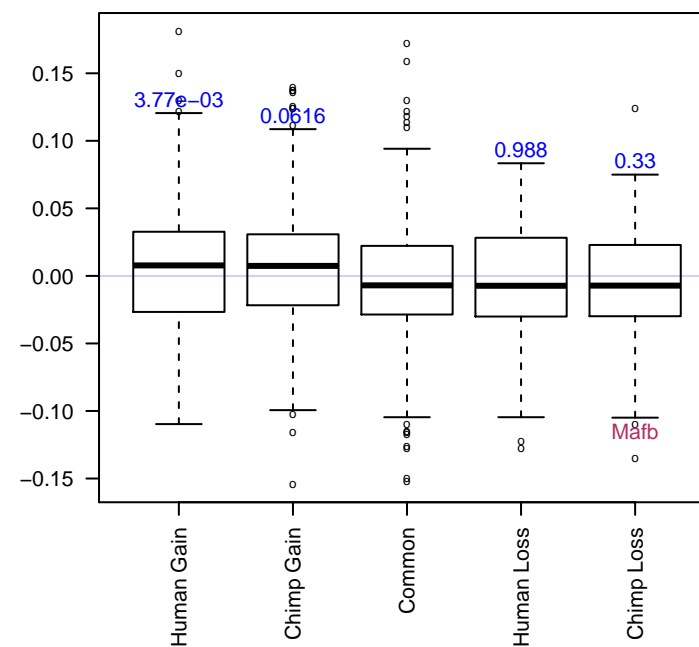

77

HumanUpFibroblast.final.bed

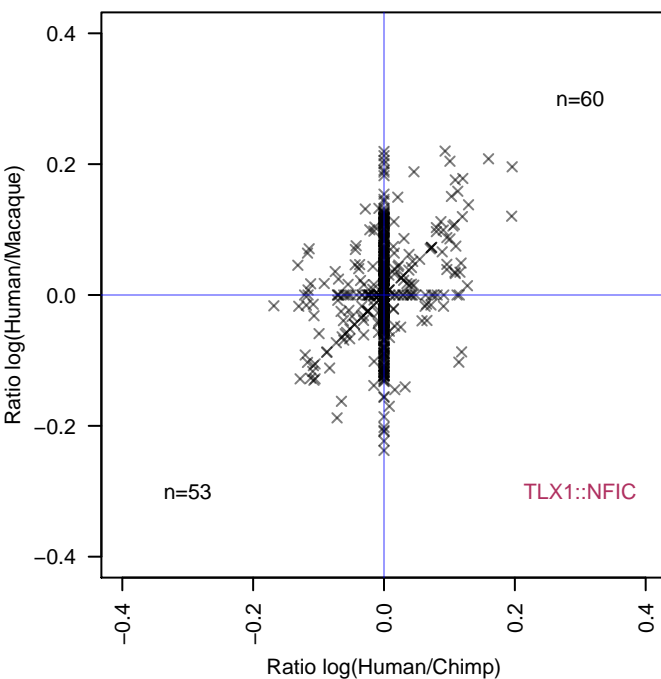

HumanDownFibroblast.final.bed

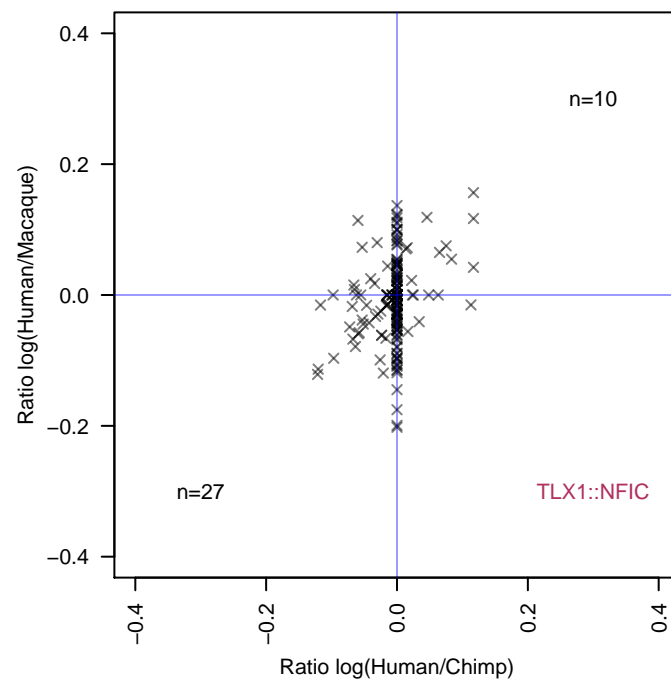

commonFibroblast.final.bed

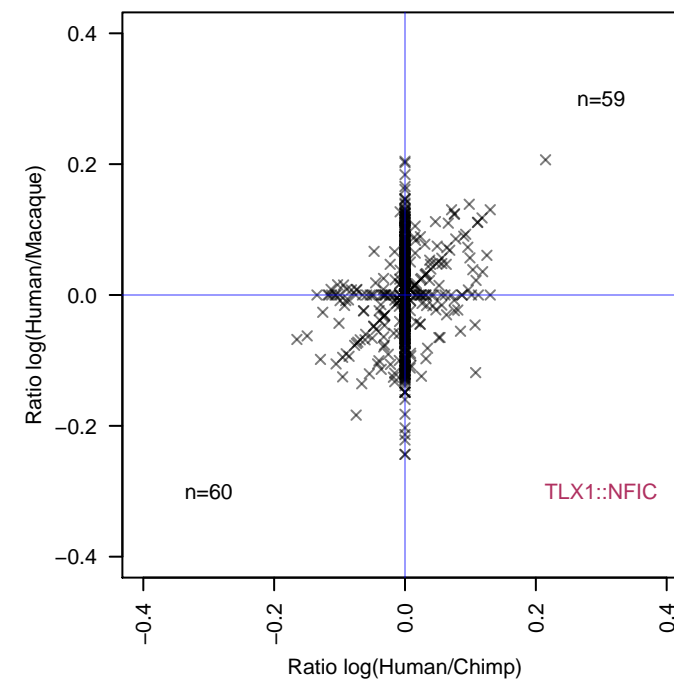

ChimpUpFibroblast.final.bed

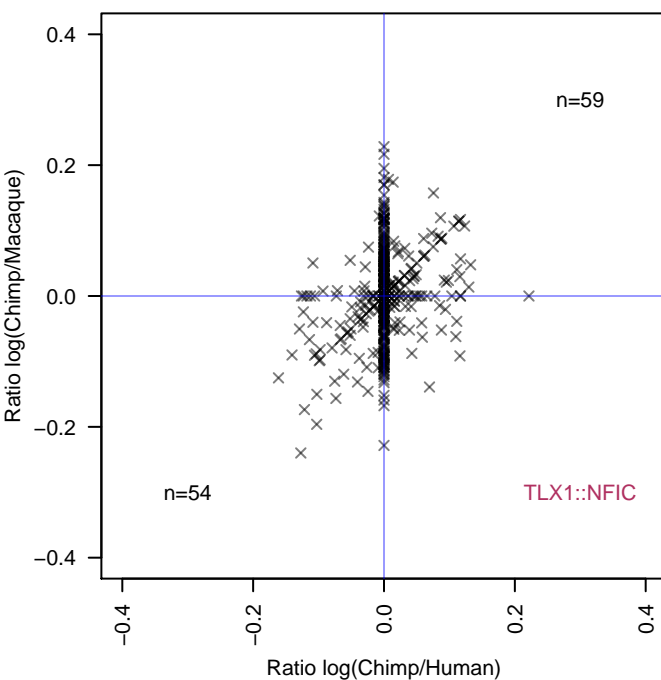

ChimpDownFibroblast.final.bed

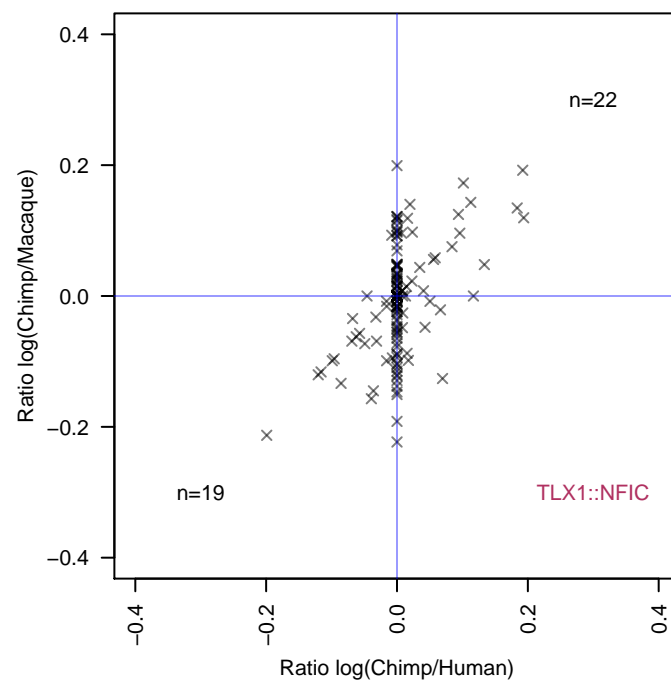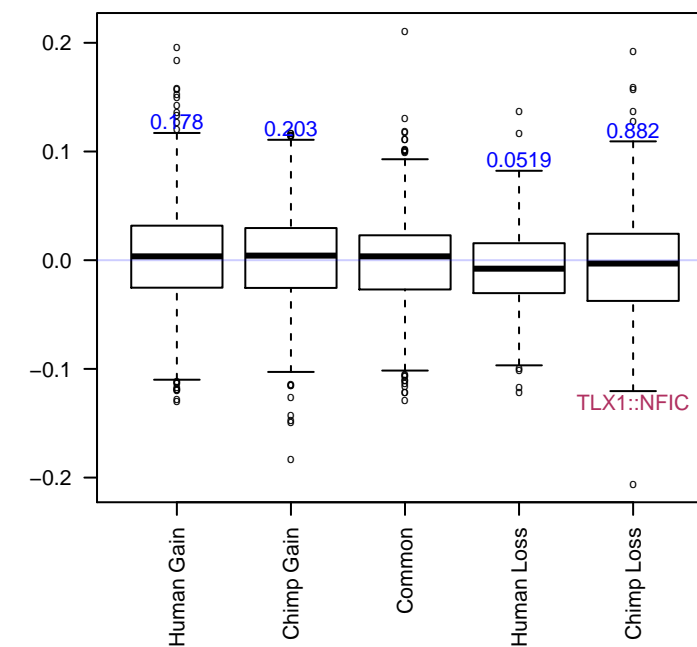

78

HumanUpFibroblast.final.bed

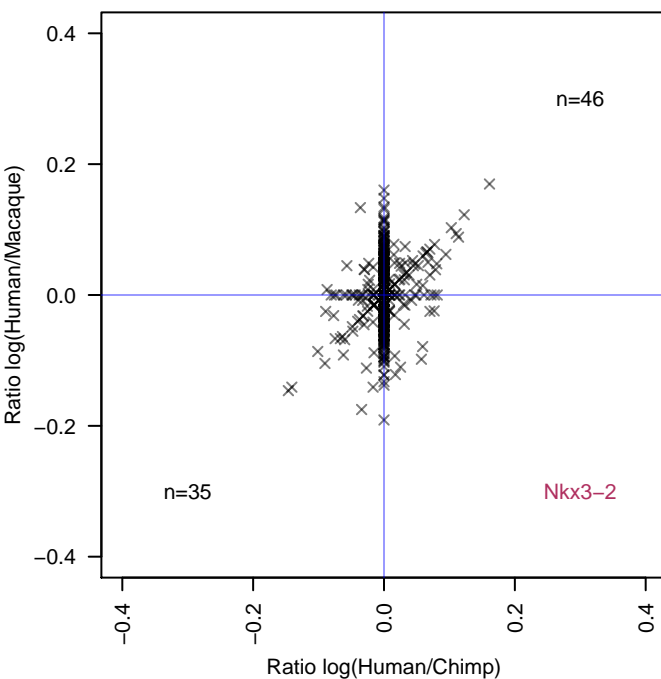

HumanDownFibroblast.final.bed

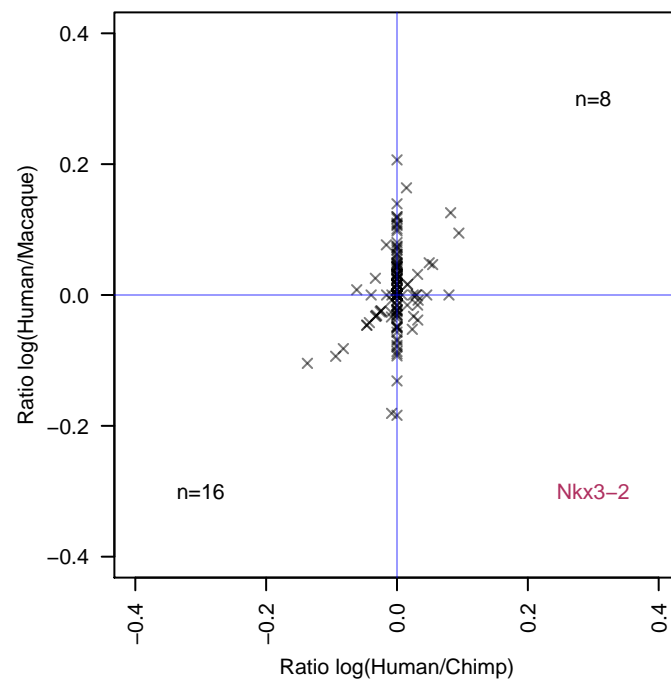

commonFibroblast.final.bed

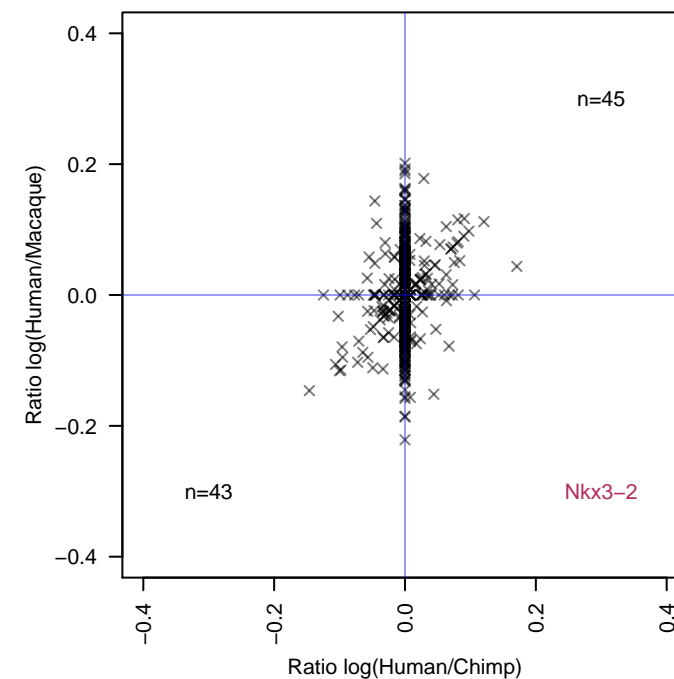

ChimpUpFibroblast.final.bed

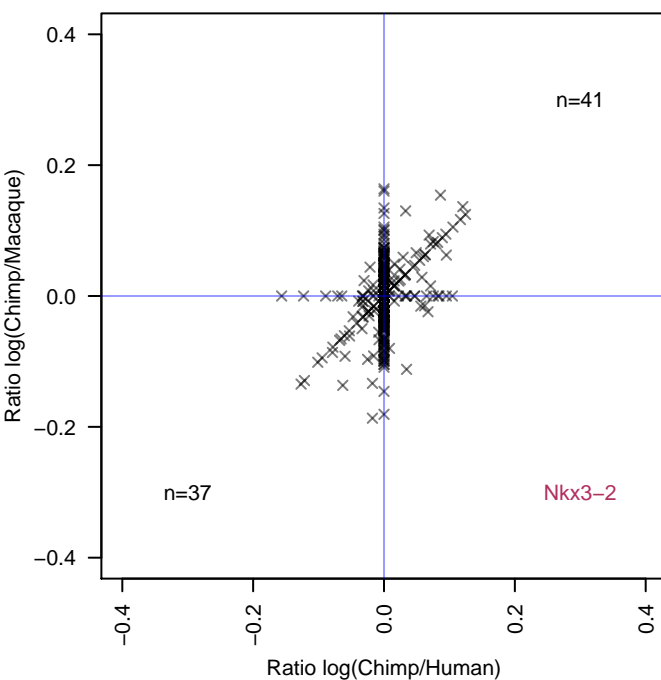

ChimpDownFibroblast.final.bed

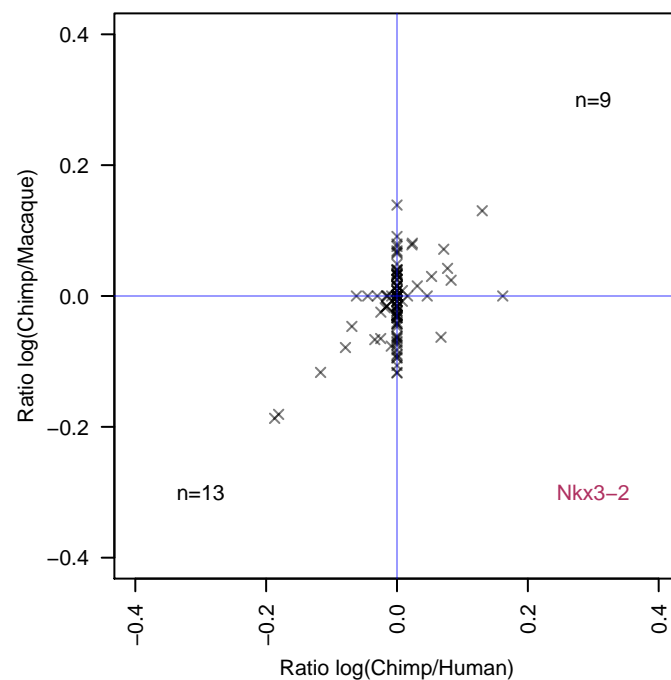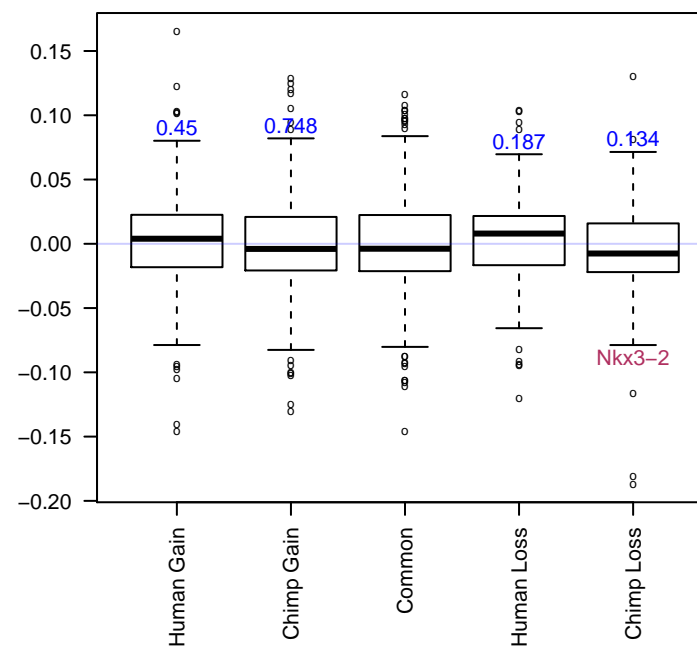

79

HumanUpFibroblast.final.bed

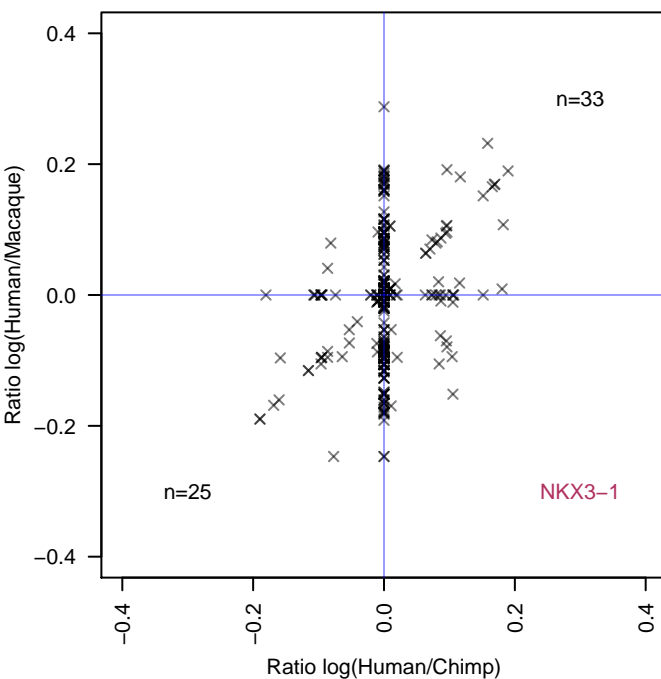

HumanDownFibroblast.final.bed

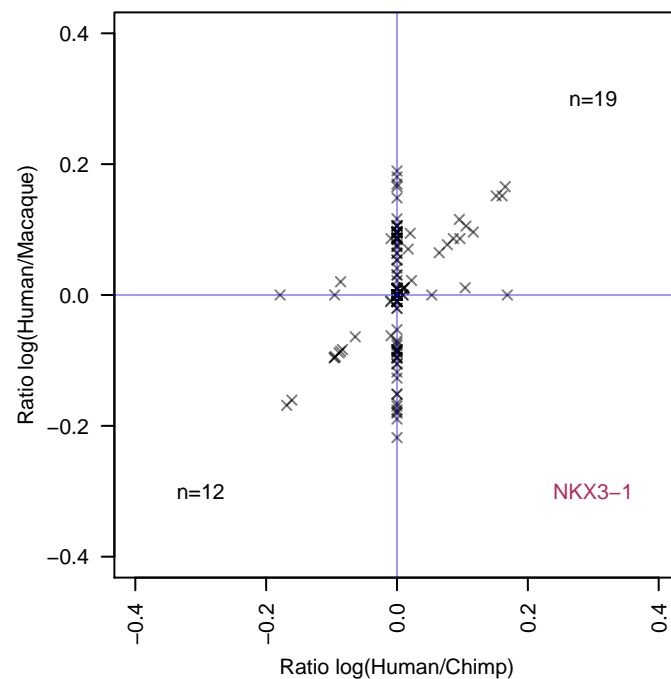

commonFibroblast.final.bed

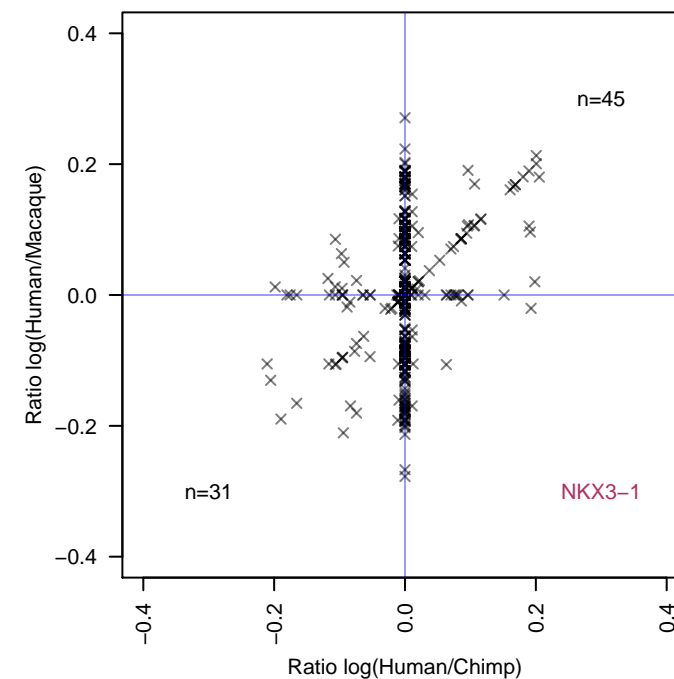

ChimpUpFibroblast.final.bed

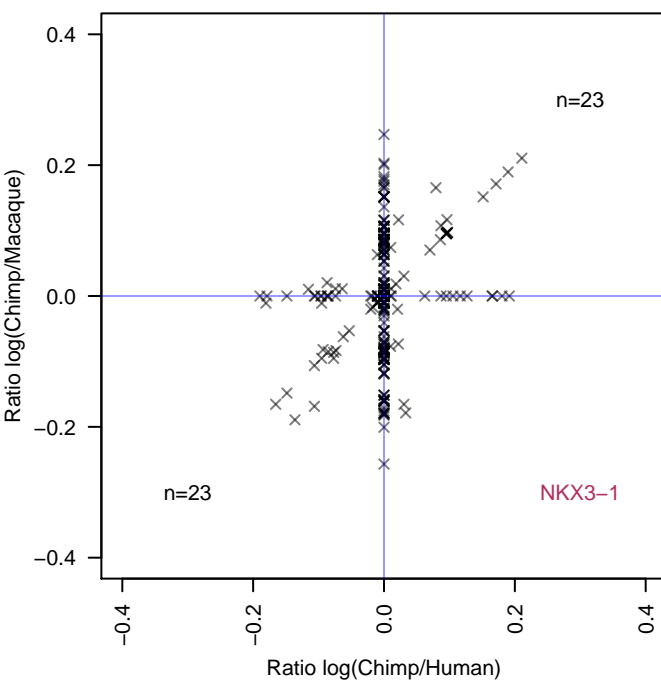

ChimpDownFibroblast.final.bed

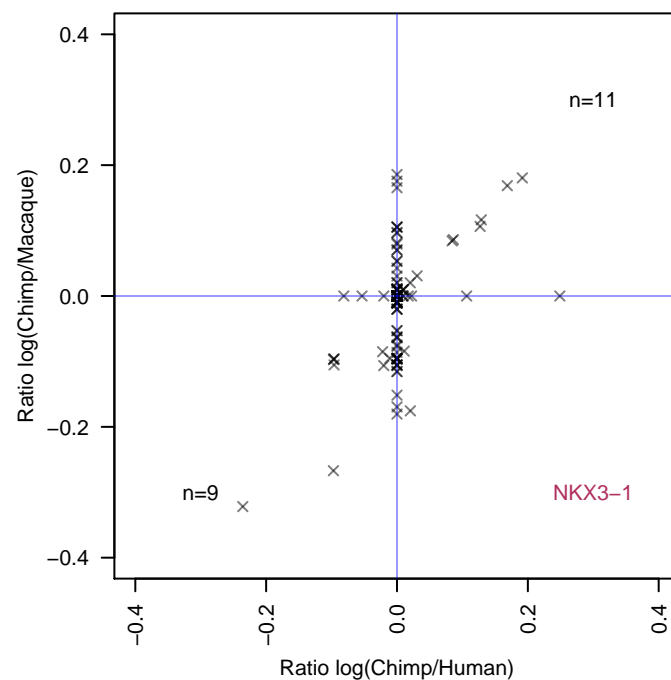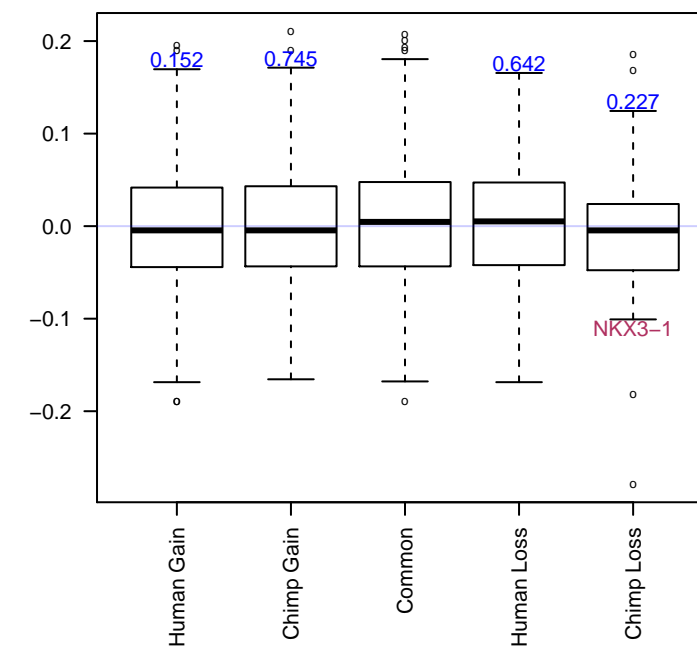

80

HumanUpFibroblast.final.bed

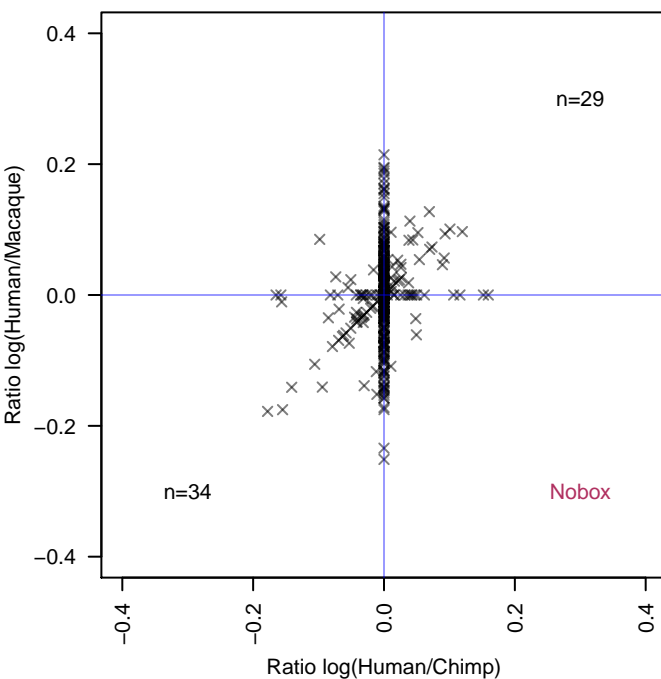

HumanDownFibroblast.final.bed

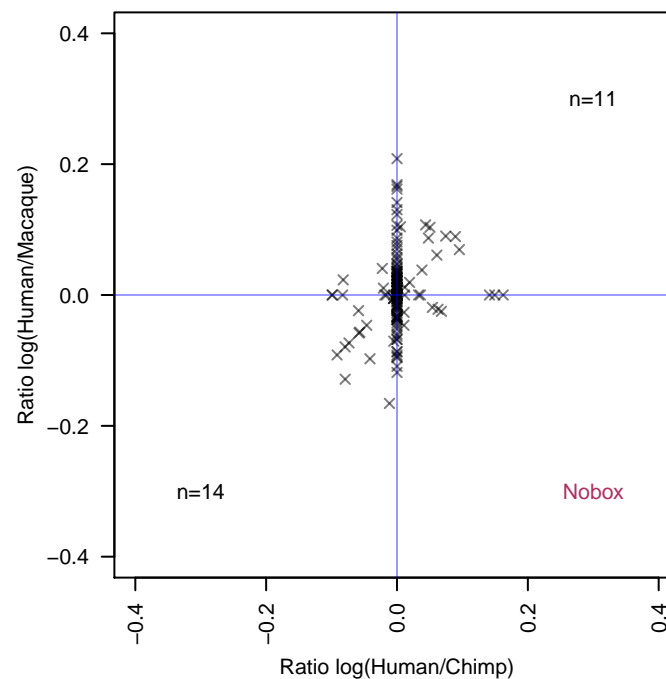

commonFibroblast.final.bed

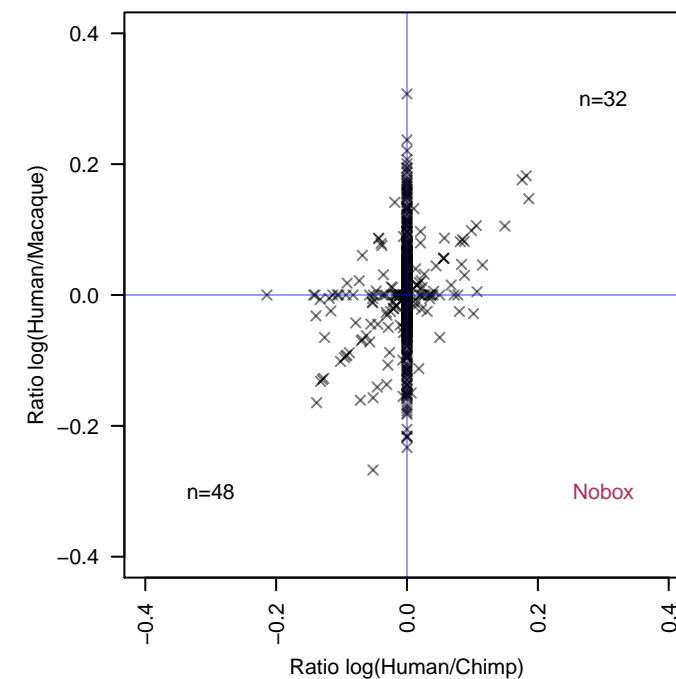

ChimpUpFibroblast.final.bed

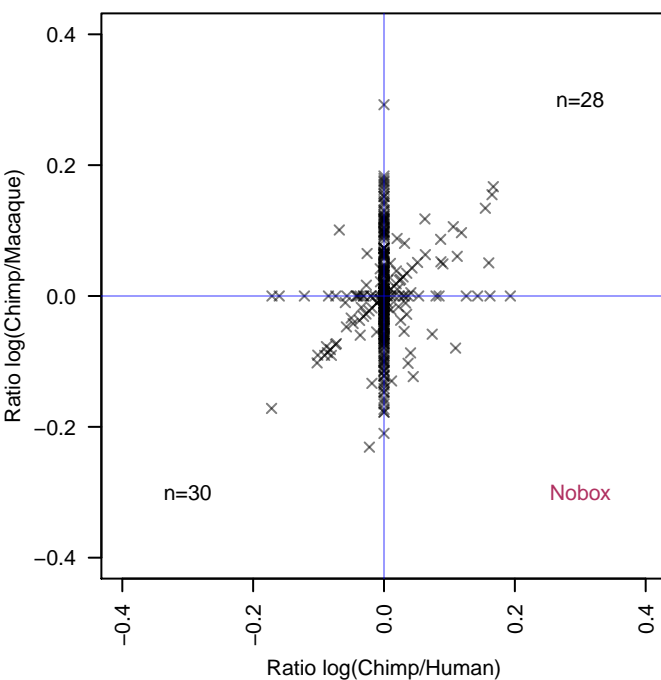

ChimpDownFibroblast.final.bed

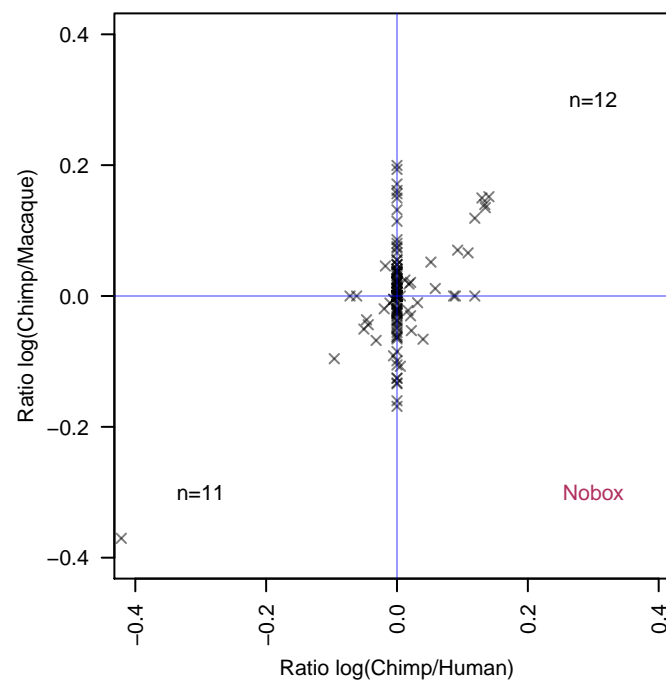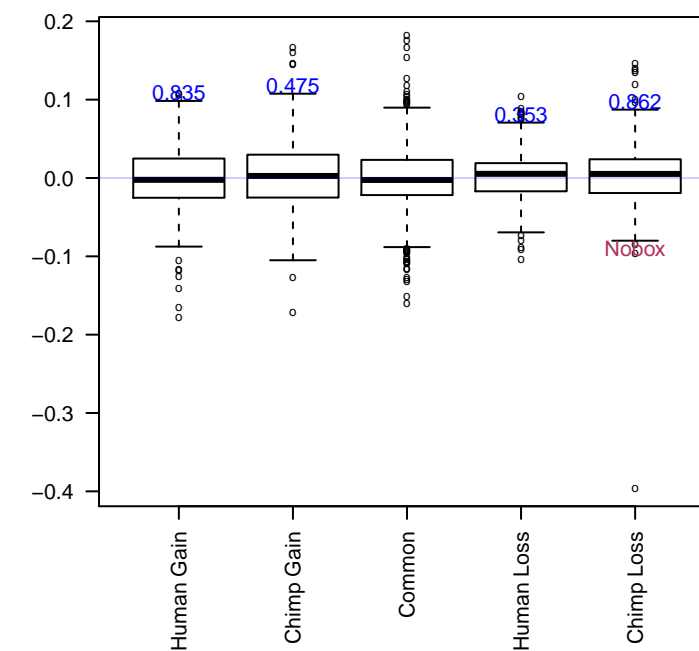

81

HumanUpFibroblast.final.bed

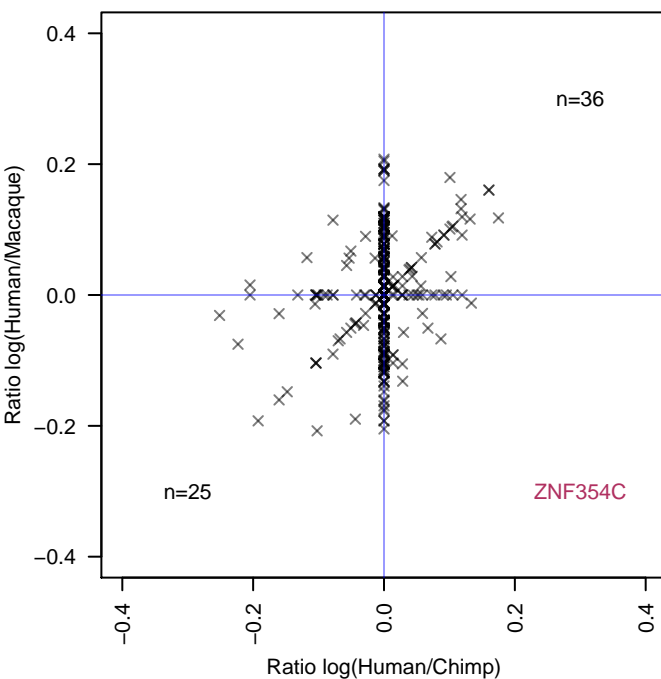

HumanDownFibroblast.final.bed

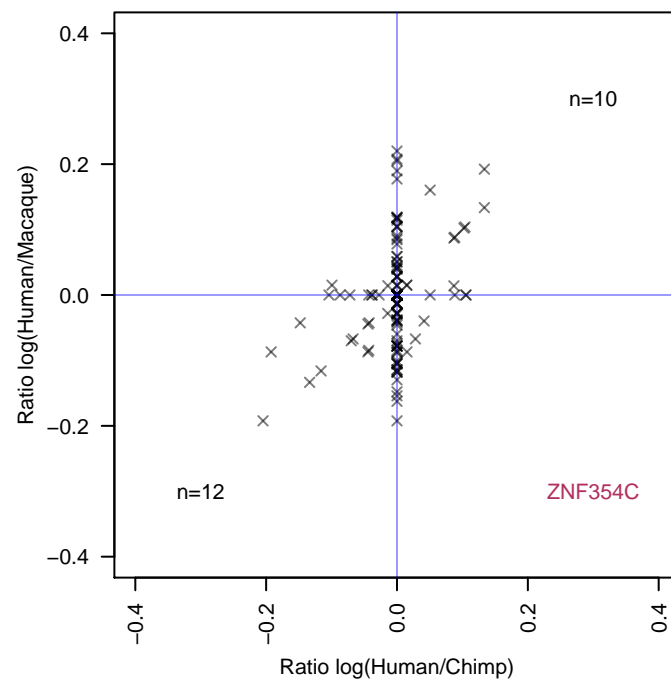

commonFibroblast.final.bed

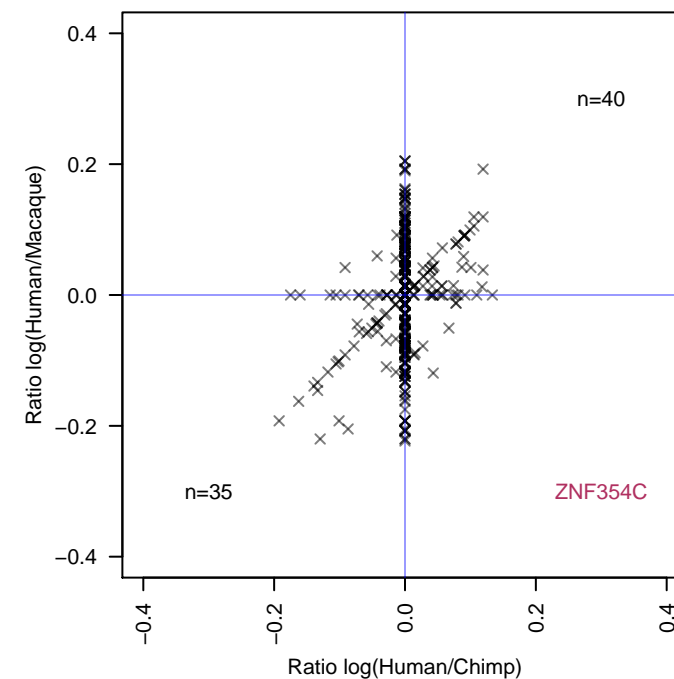

ChimpUpFibroblast.final.bed

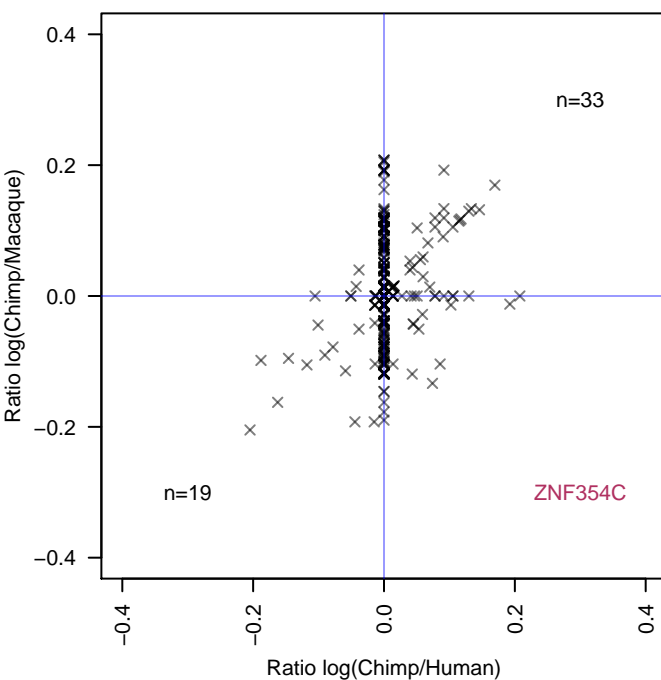

ChimpDownFibroblast.final.bed

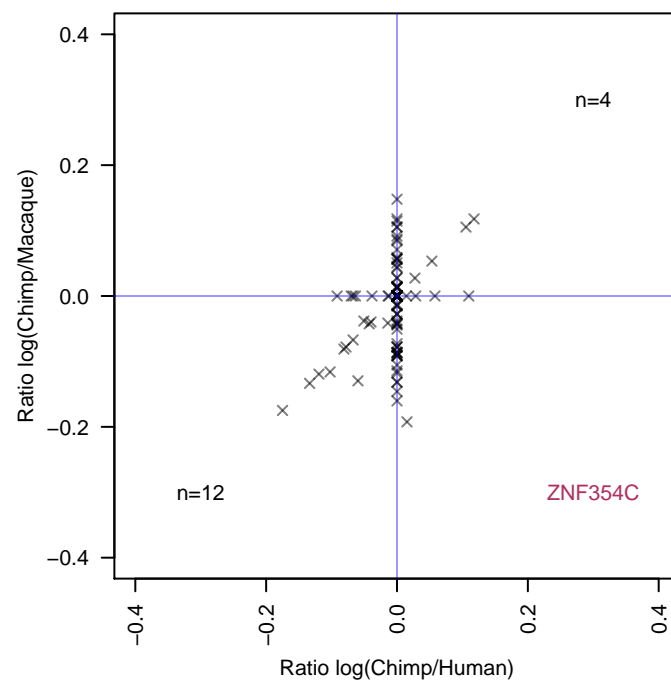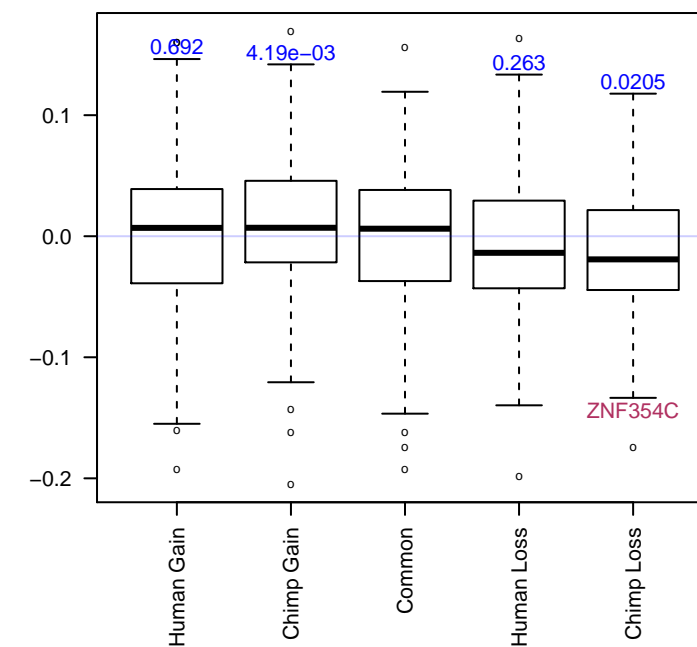

82

HumanUpFibroblast.final.bed

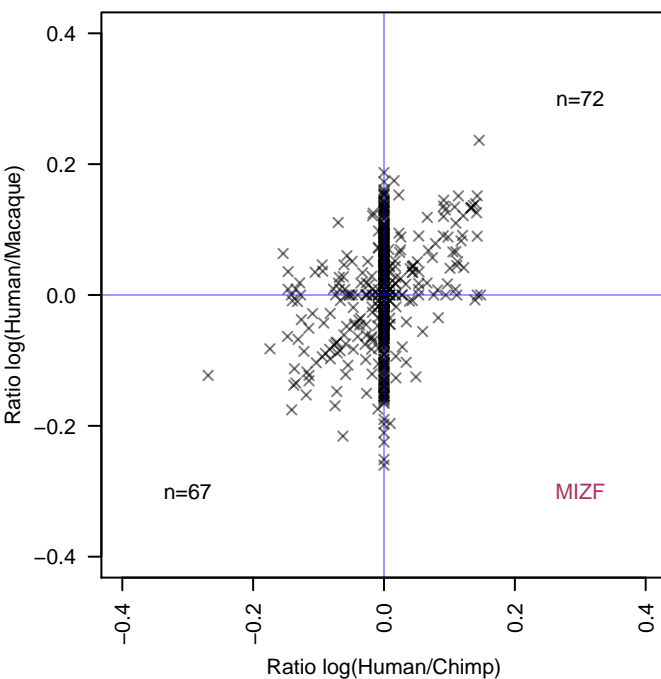

HumanDownFibroblast.final.bed

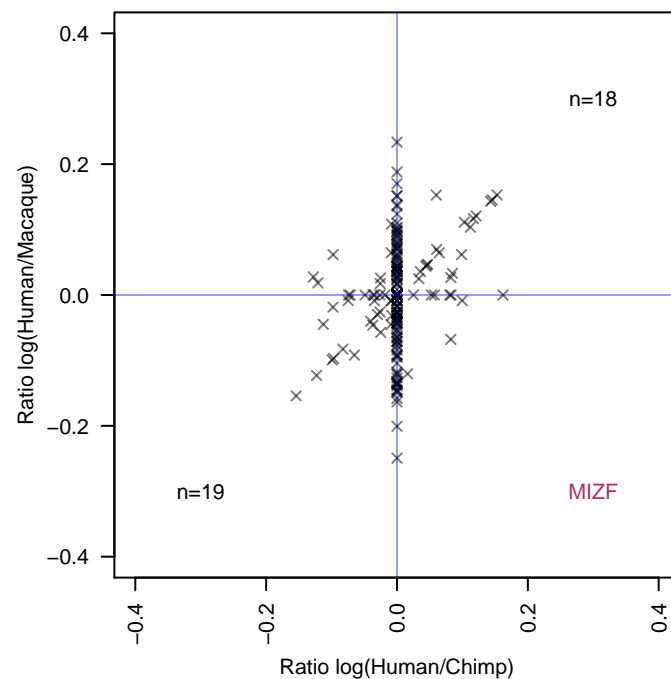

commonFibroblast.final.bed

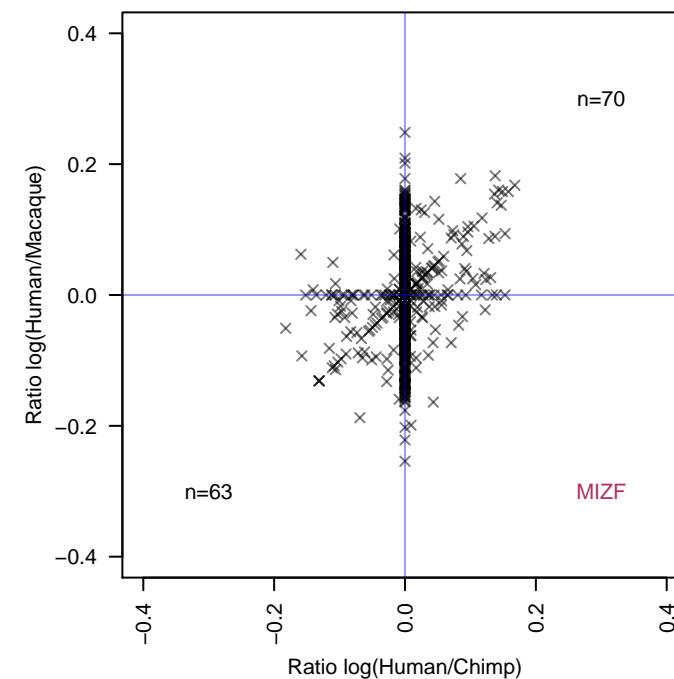

ChimpUpFibroblast.final.bed

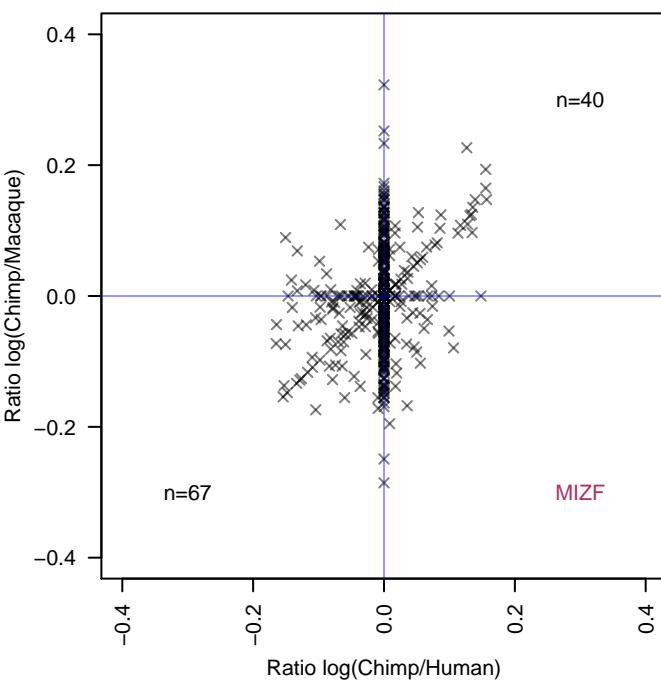

ChimpDownFibroblast.final.bed

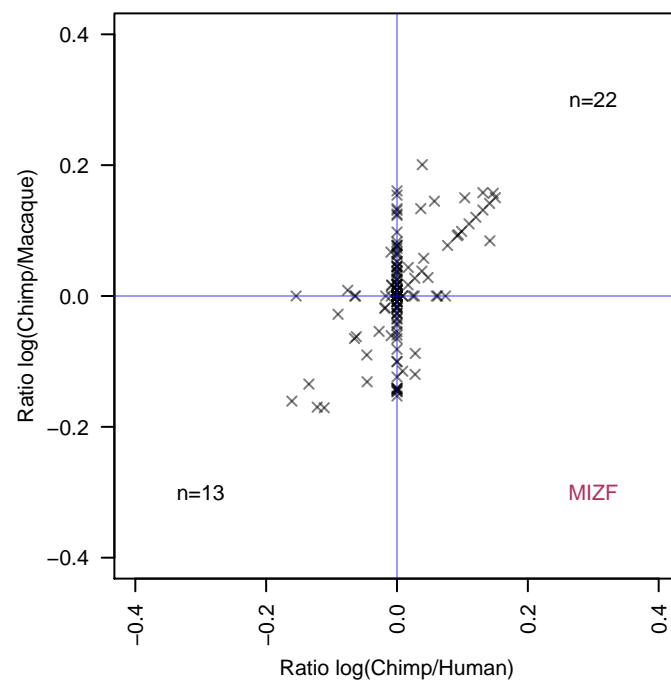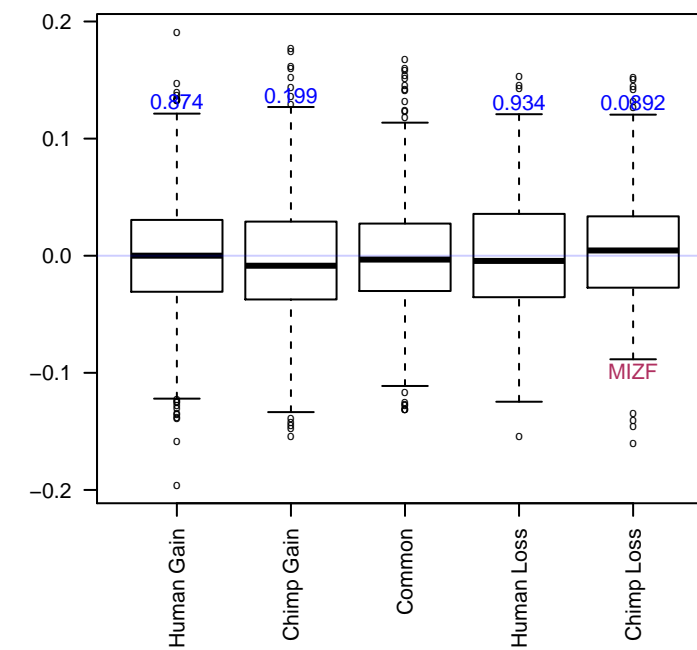

83

HumanUpFibroblast.final.bed

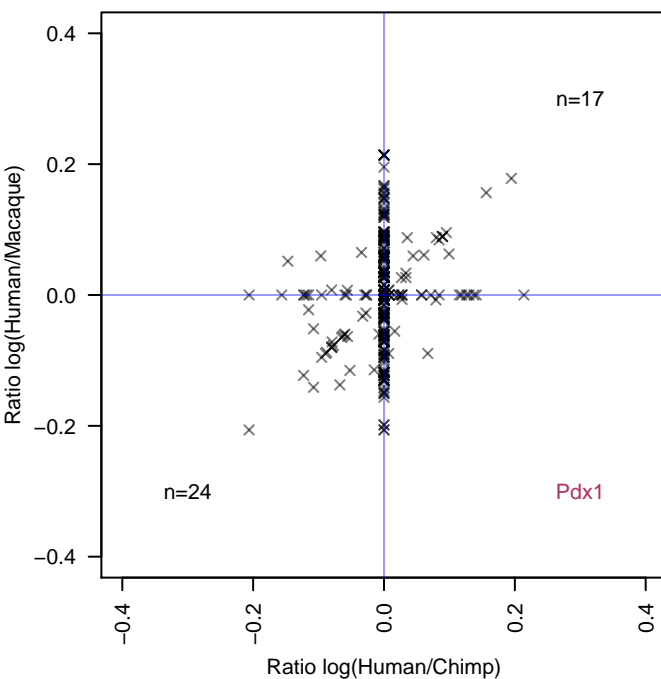

HumanDownFibroblast.final.bed

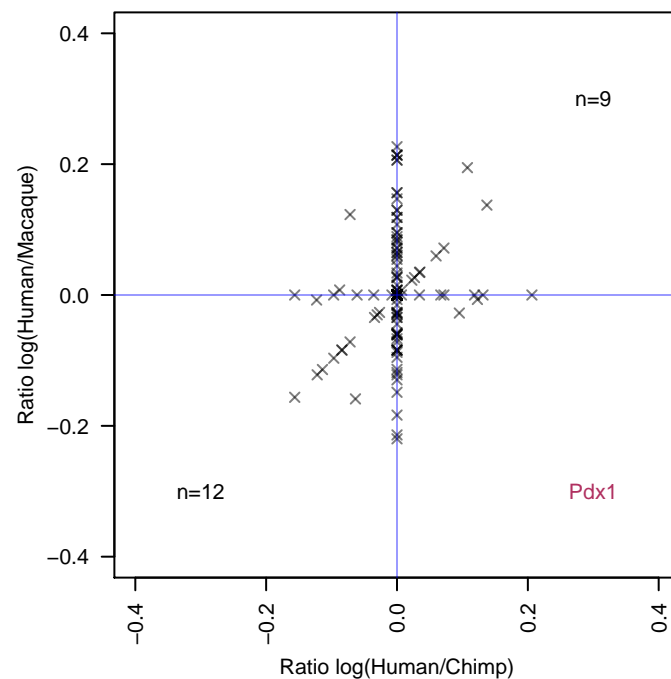

commonFibroblast.final.bed

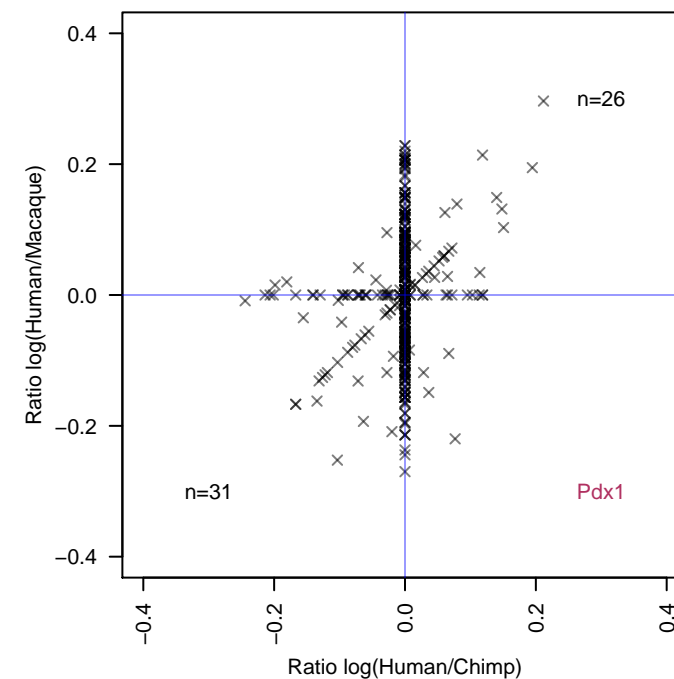

ChimpUpFibroblast.final.bed

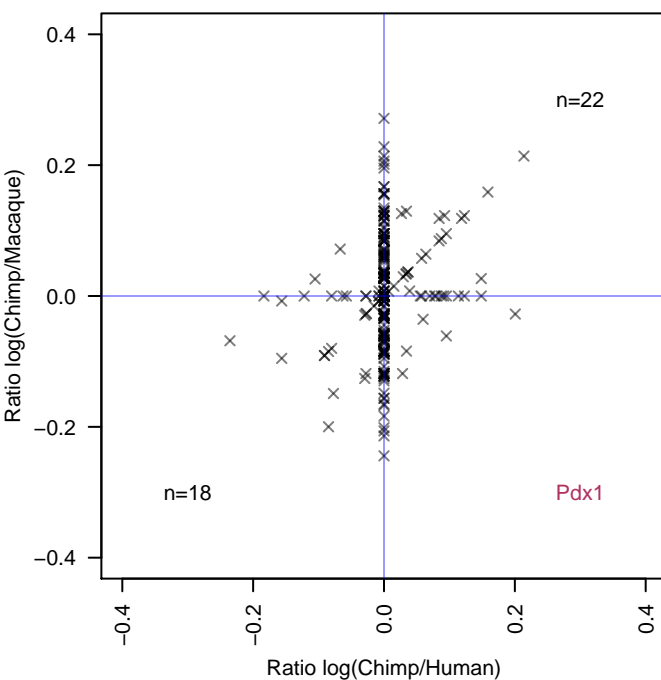

ChimpDownFibroblast.final.bed

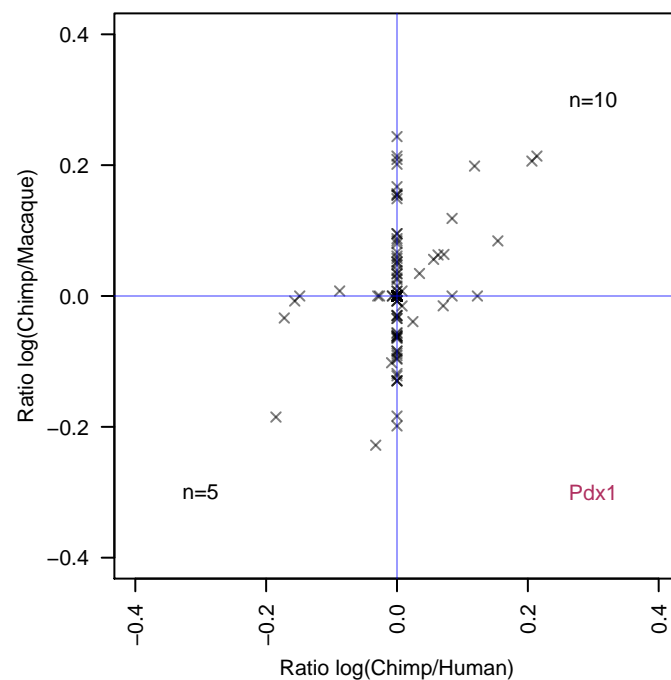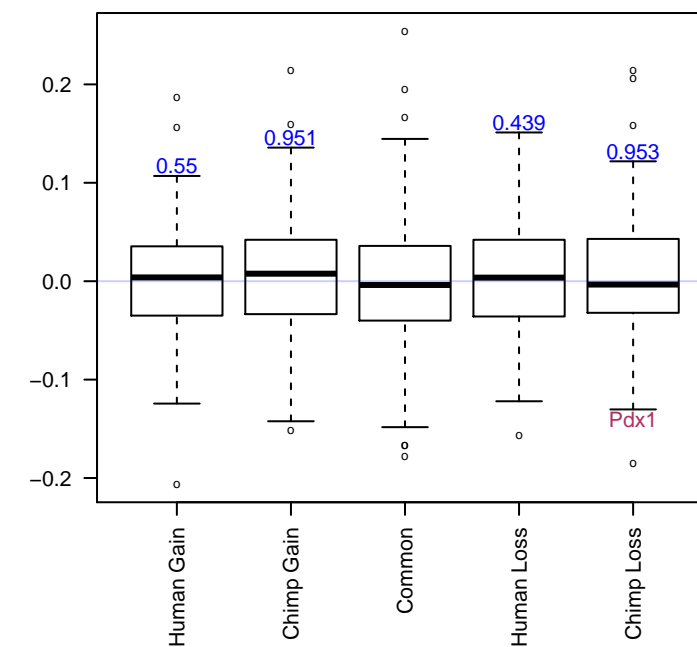

84

HumanUpFibroblast.final.bed

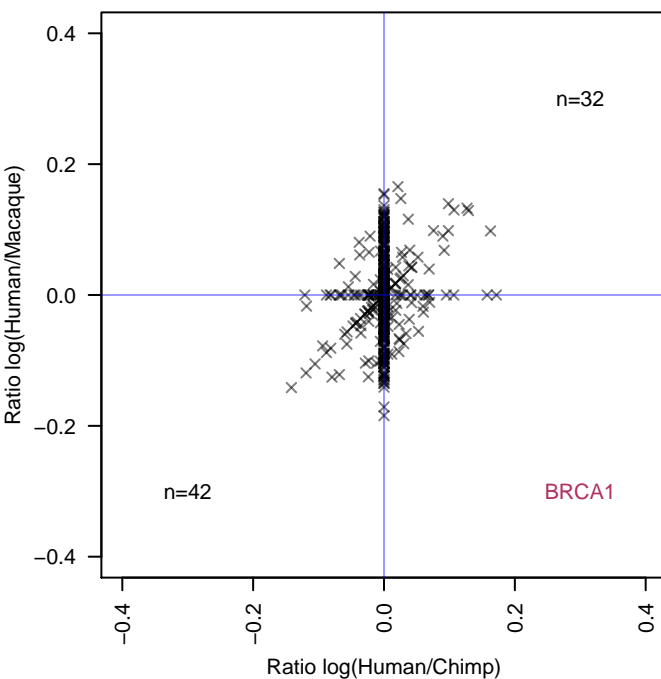

HumanDownFibroblast.final.bed

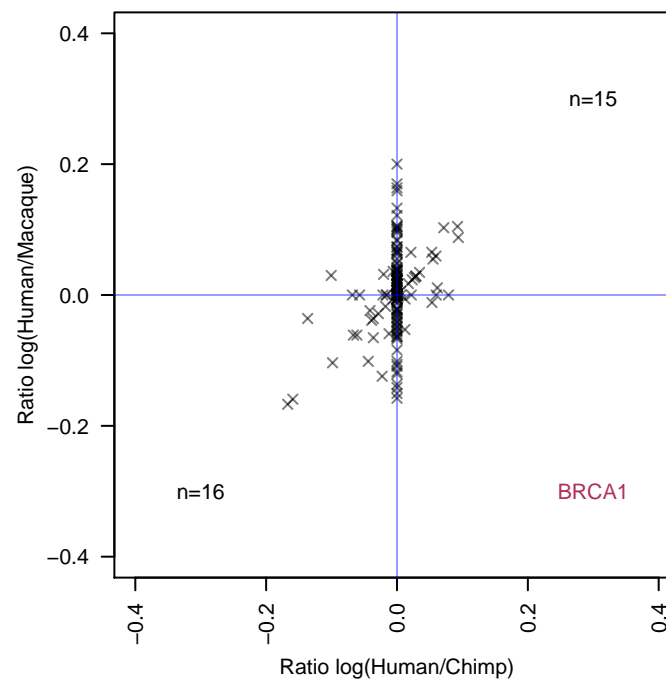

commonFibroblast.final.bed

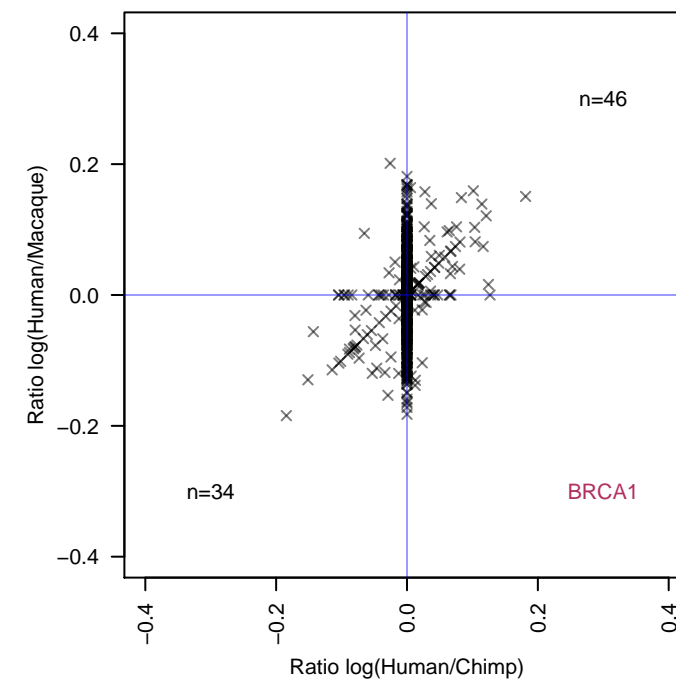

ChimpUpFibroblast.final.bed

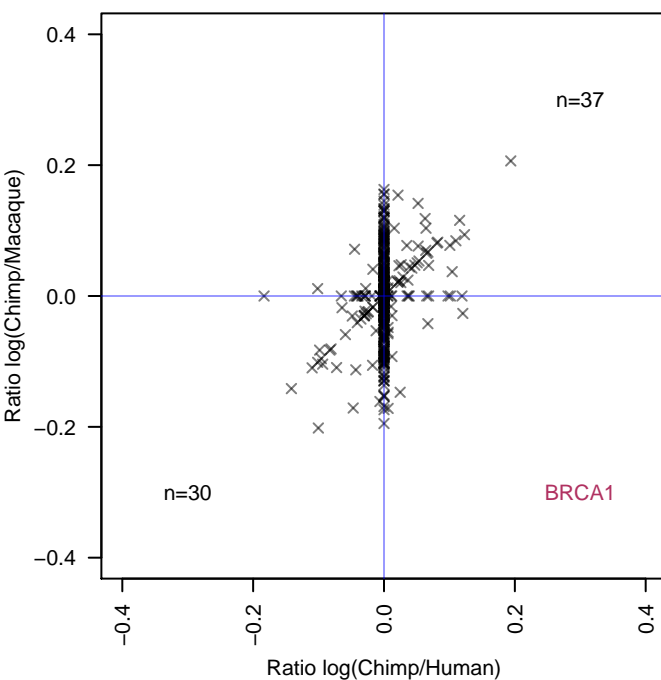

ChimpDownFibroblast.final.bed

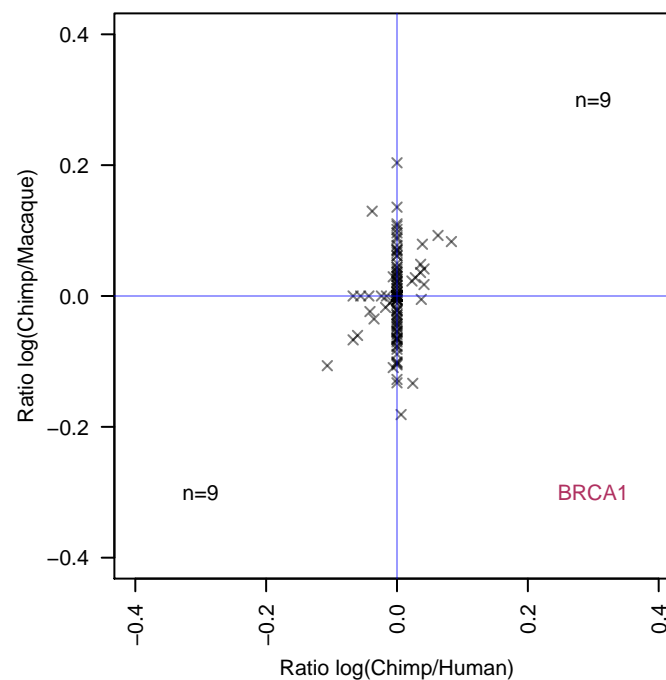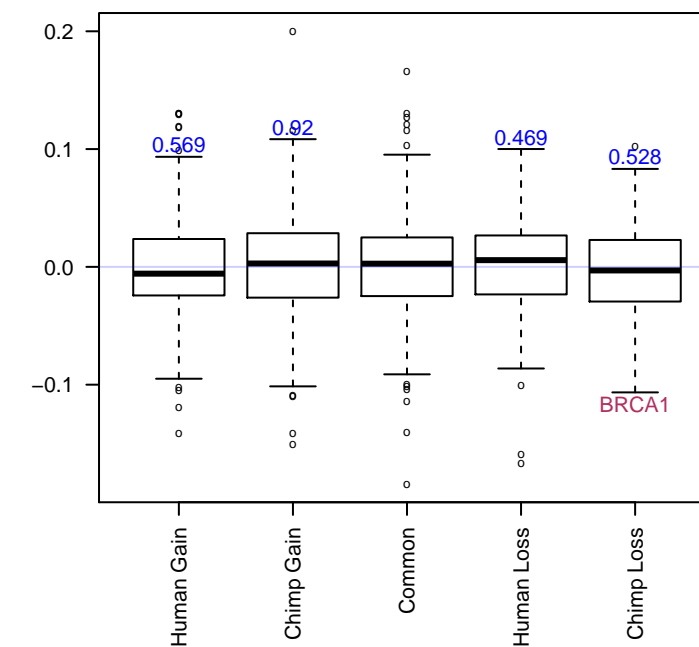

85

HumanUpFibroblast.final.bed

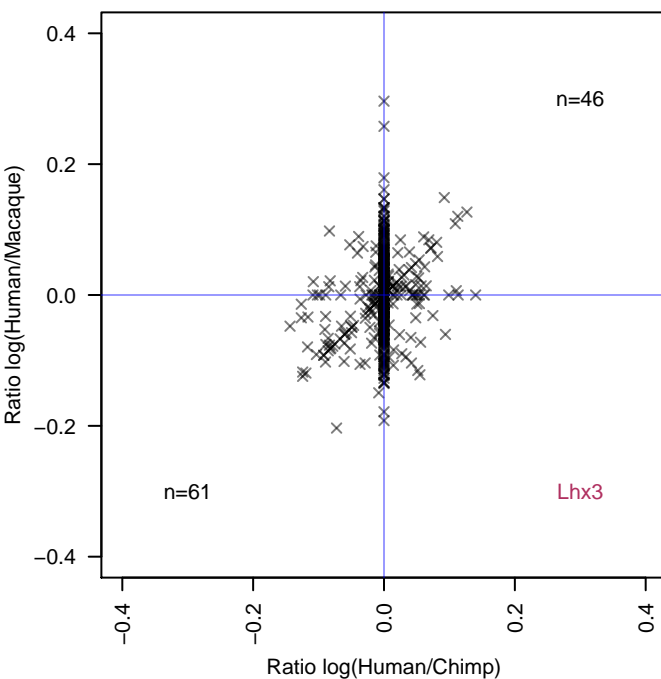

HumanDownFibroblast.final.bed

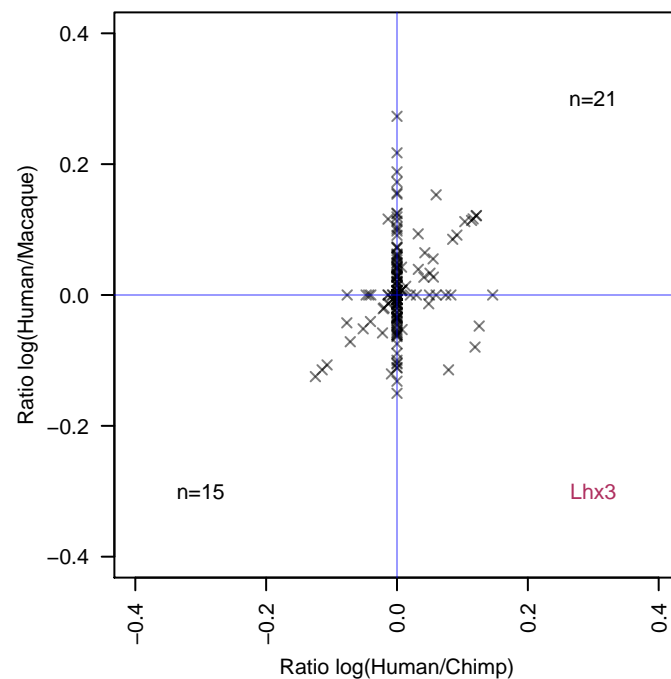

commonFibroblast.final.bed

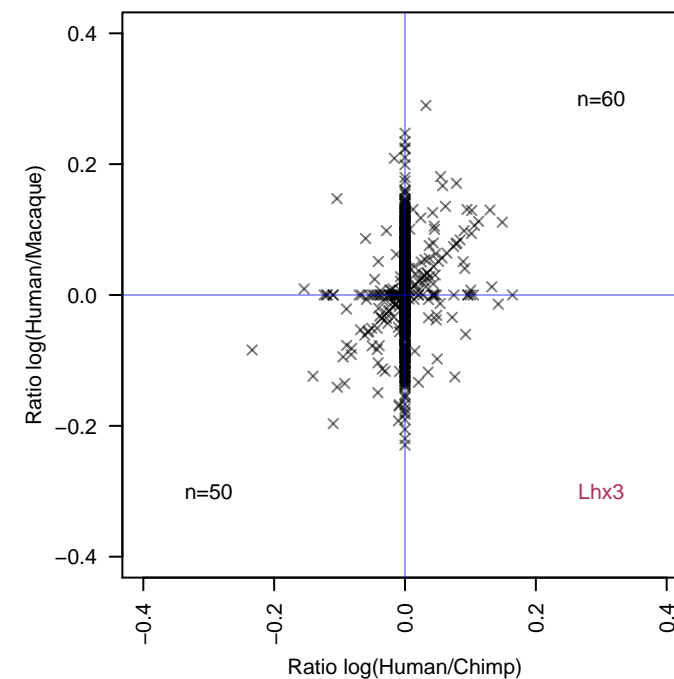

ChimpUpFibroblast.final.bed

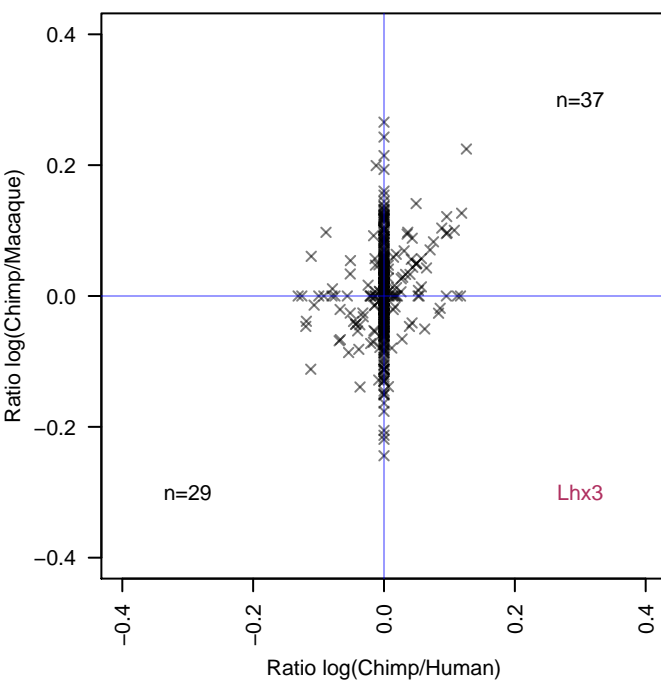

ChimpDownFibroblast.final.bed

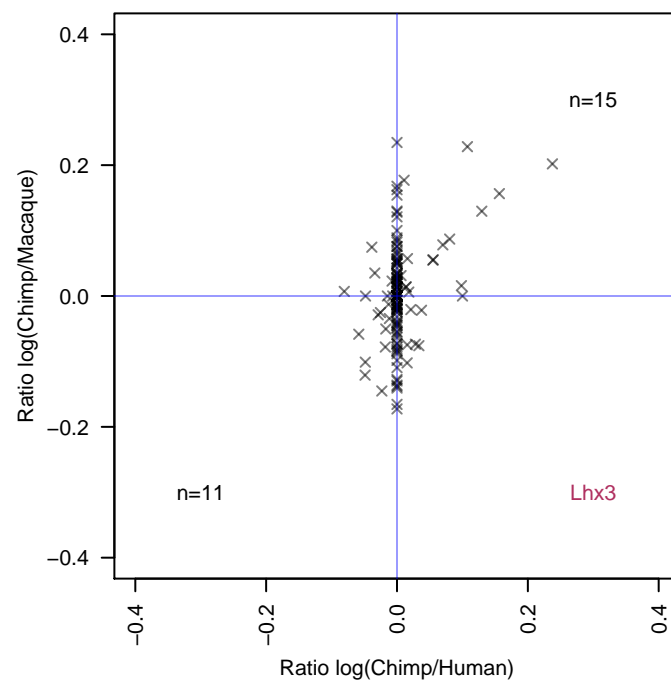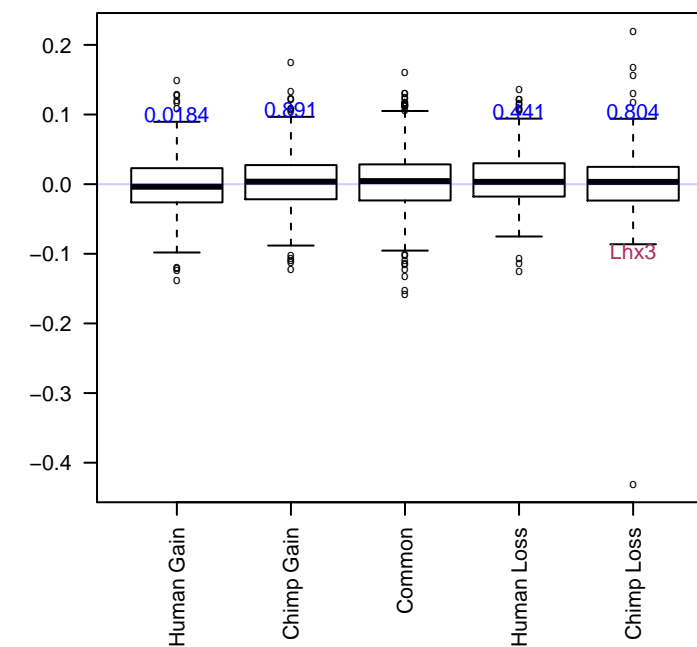

86

HumanUpFibroblast.final.bed

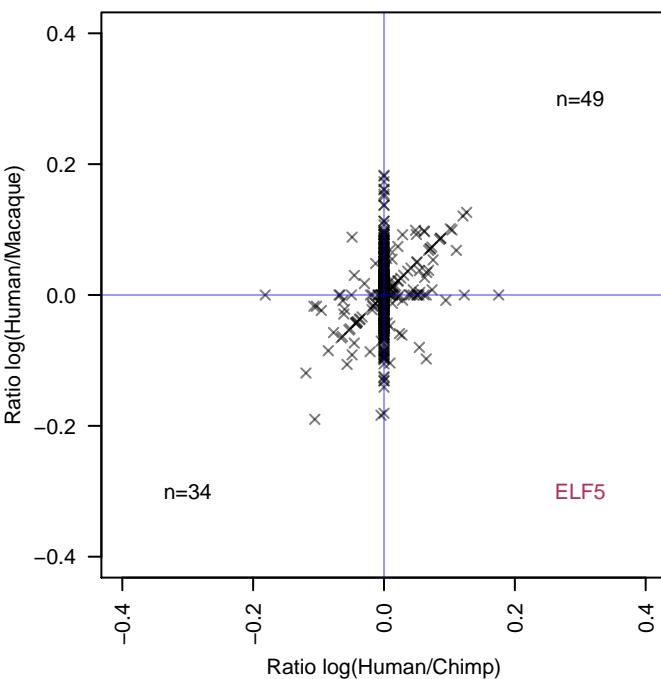

HumanDownFibroblast.final.bed

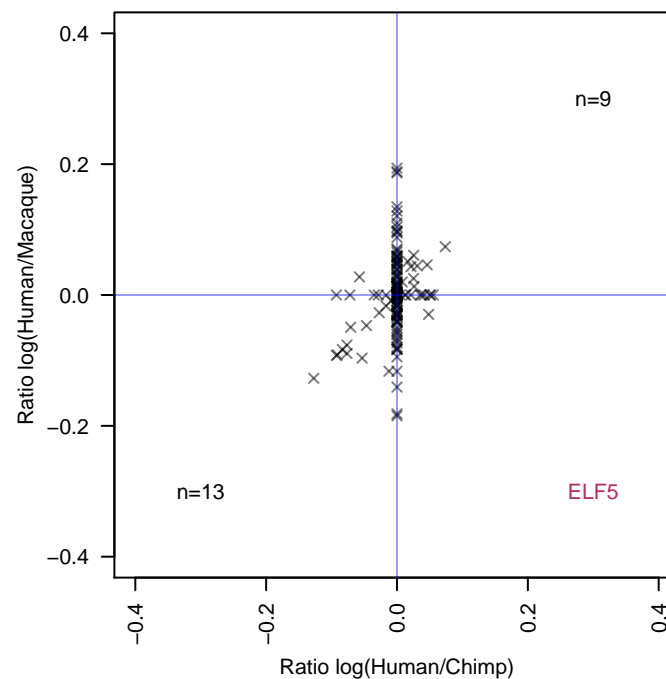

commonFibroblast.final.bed

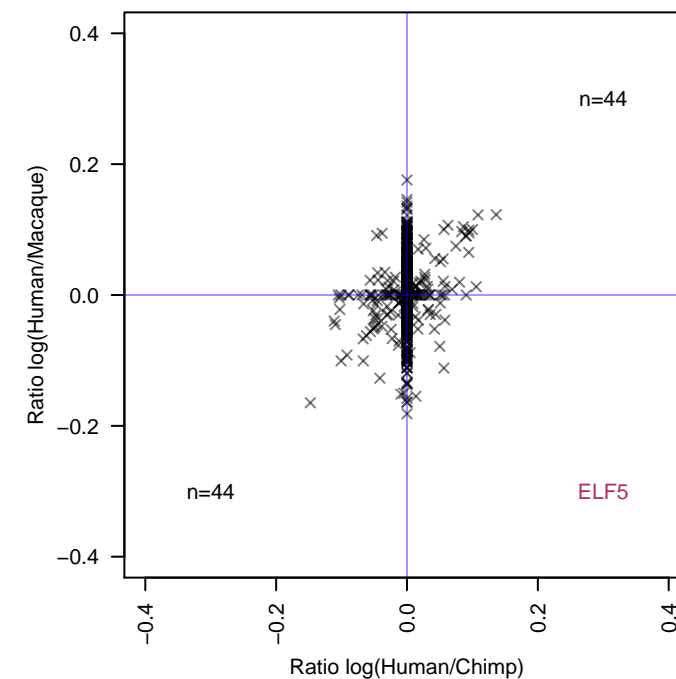

ChimpUpFibroblast.final.bed

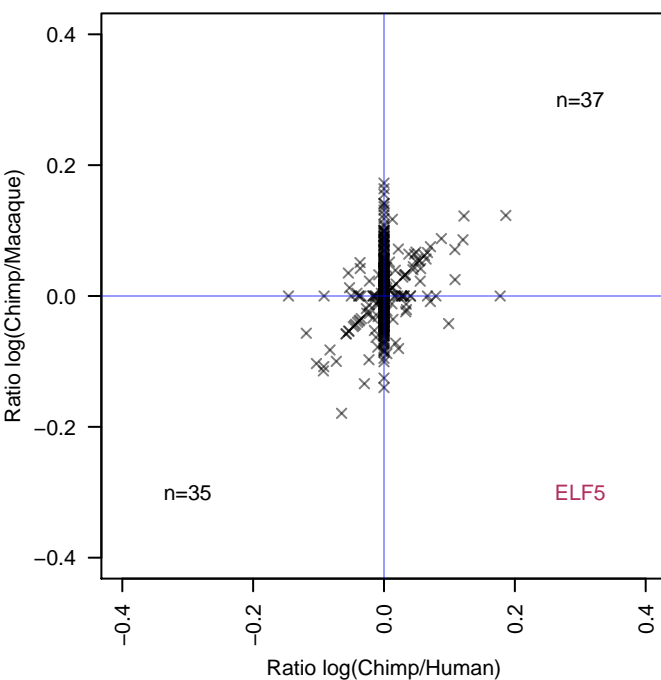

ChimpDownFibroblast.final.bed

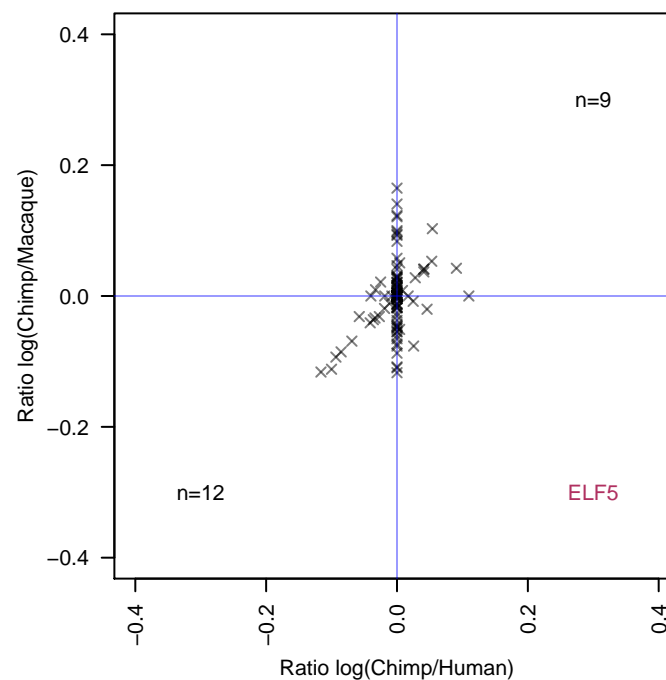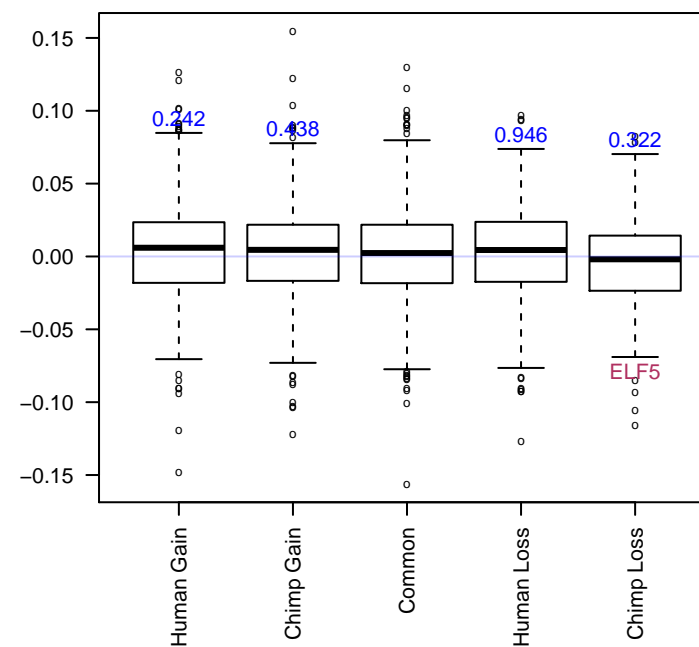

87

HumanUpFibroblast.final.bed

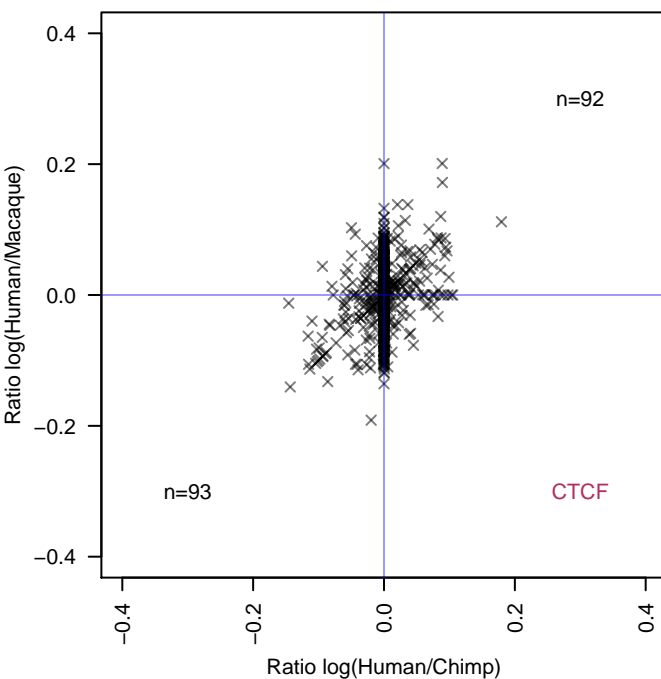

HumanDownFibroblast.final.bed

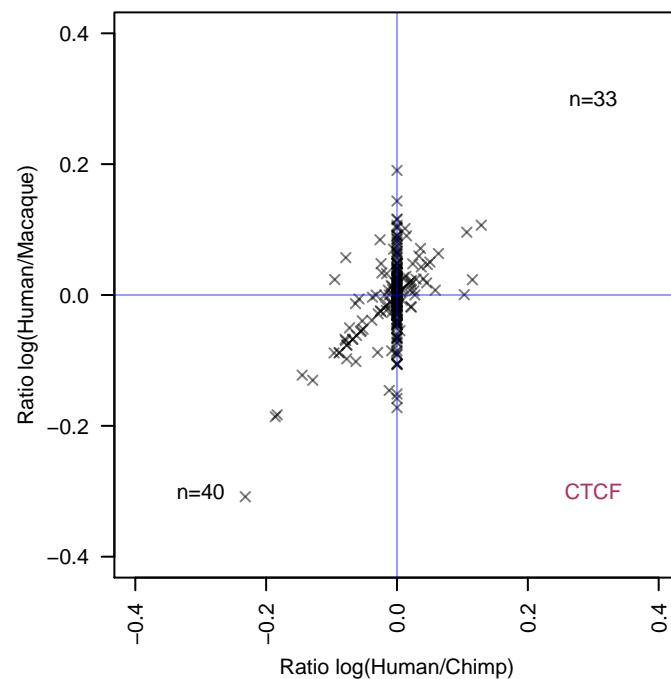

commonFibroblast.final.bed

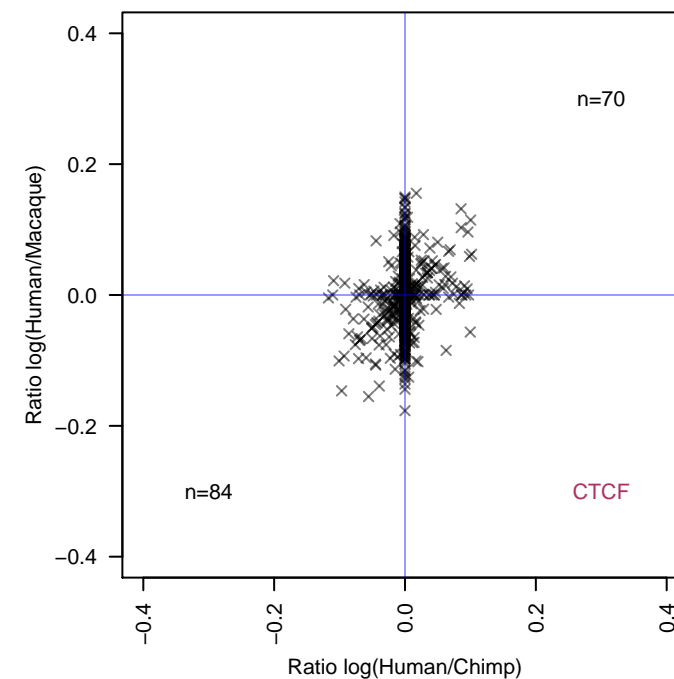

ChimpUpFibroblast.final.bed

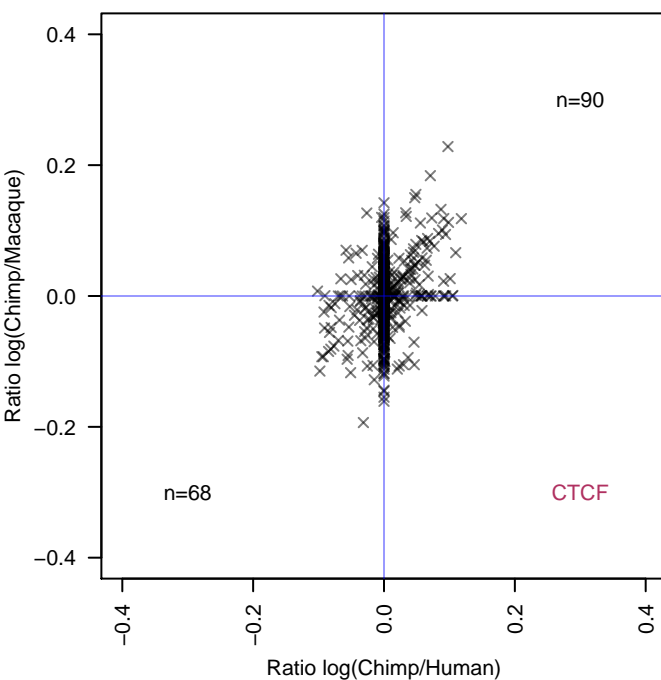

ChimpDownFibroblast.final.bed

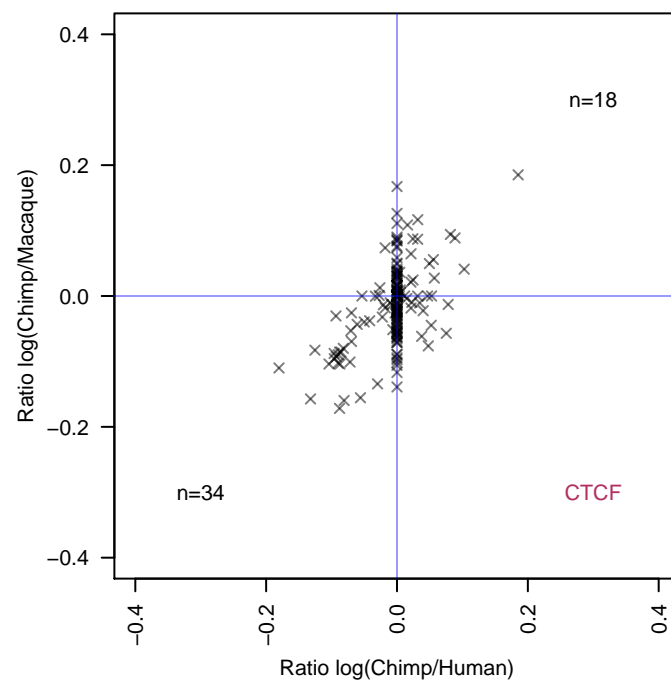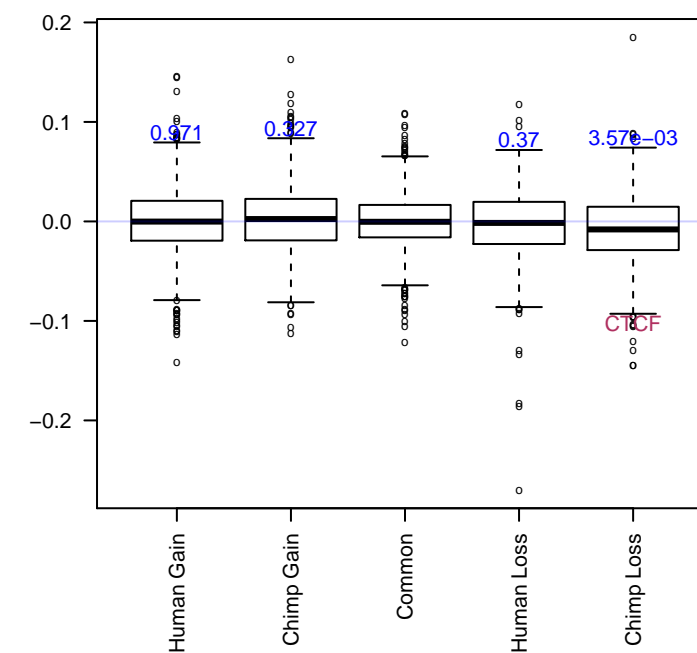

88

HumanUpFibroblast.final.bed

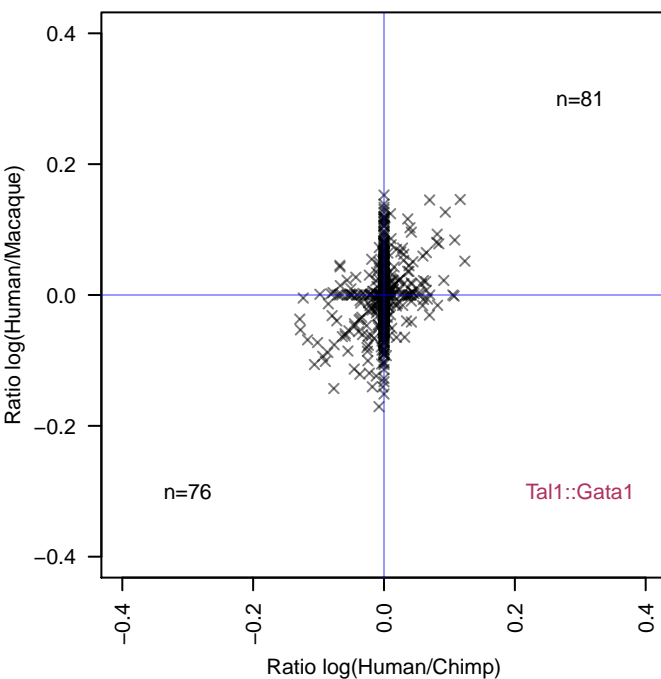

HumanDownFibroblast.final.bed

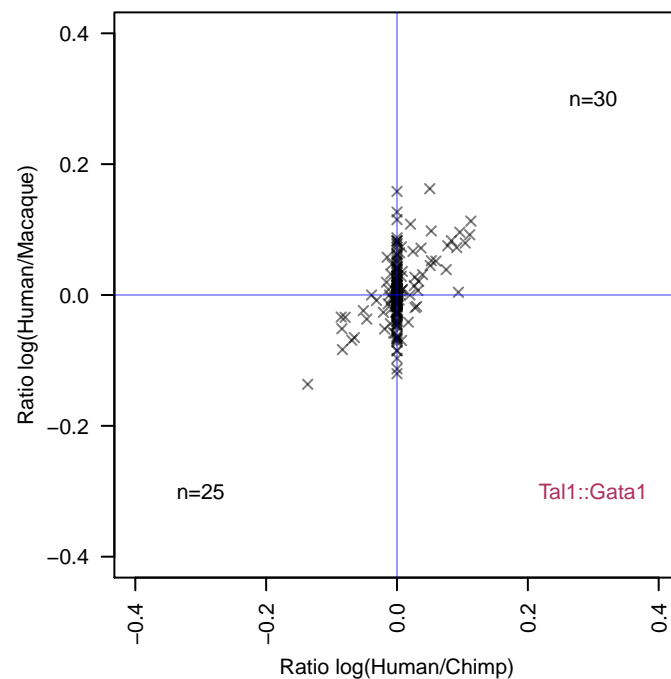

commonFibroblast.final.bed

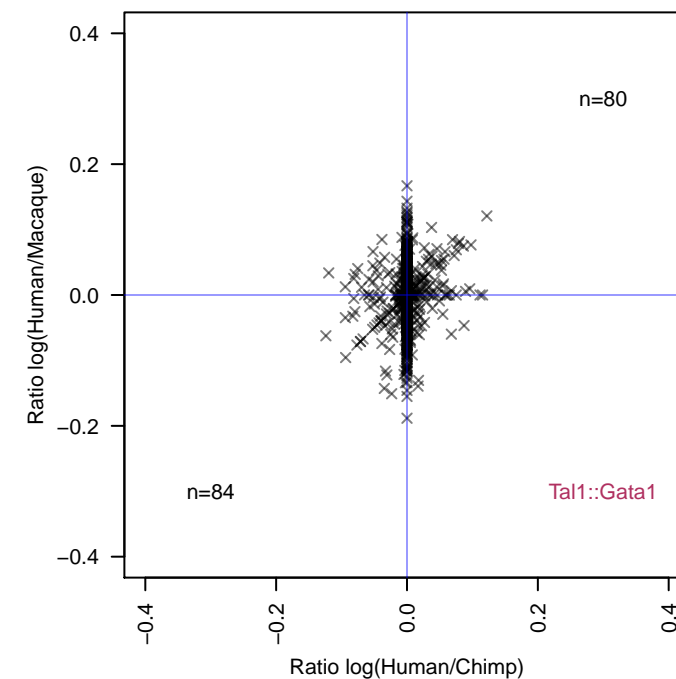

ChimpUpFibroblast.final.bed

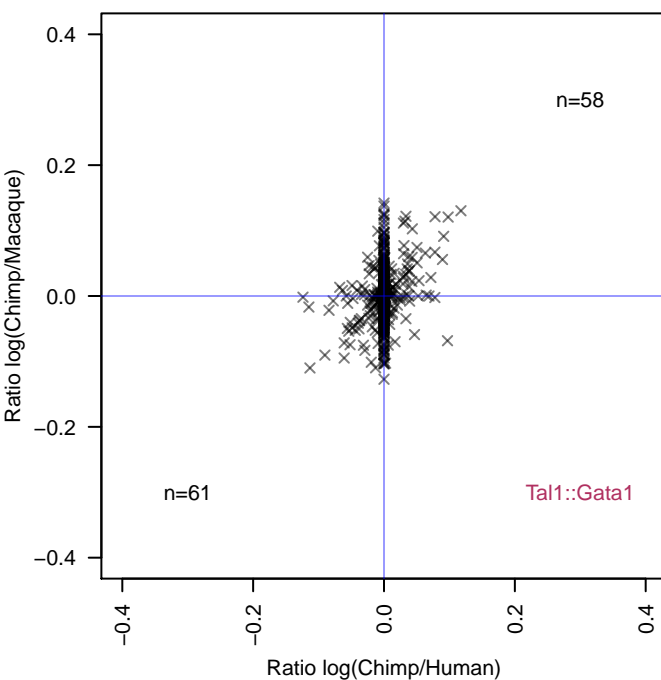

ChimpDownFibroblast.final.bed

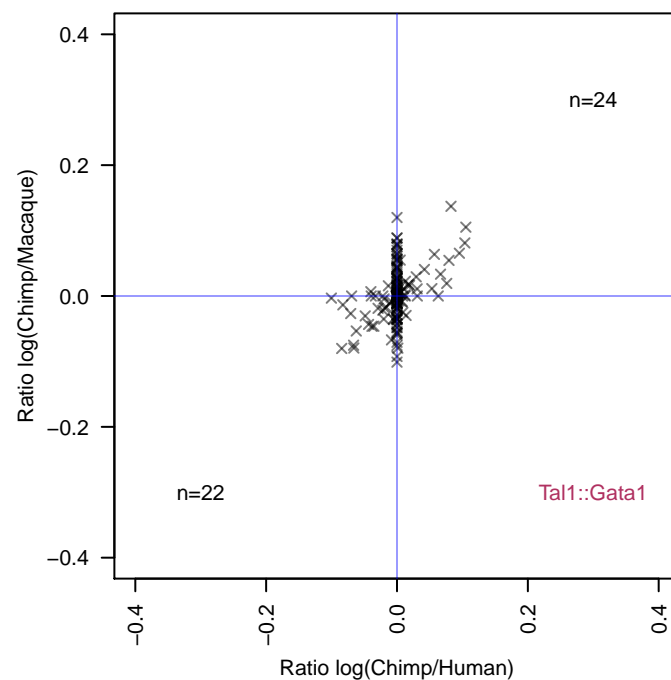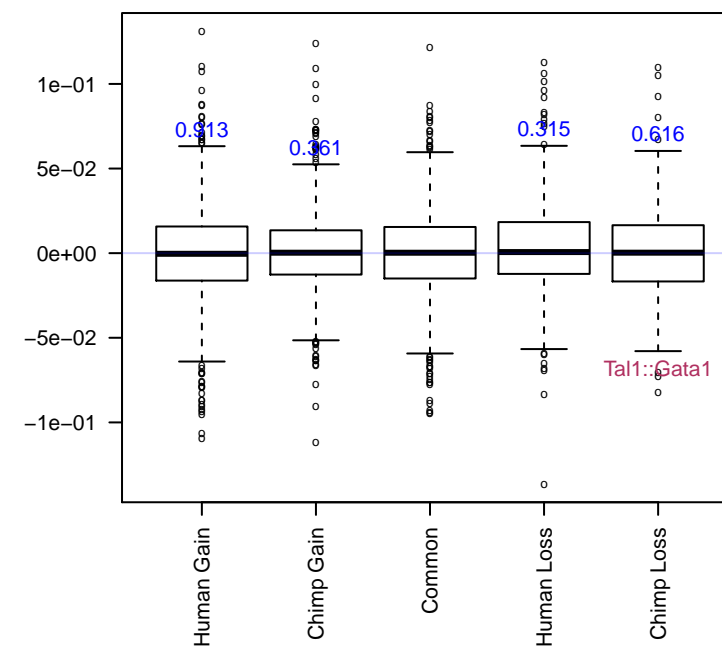

89

HumanUpFibroblast.final.bed

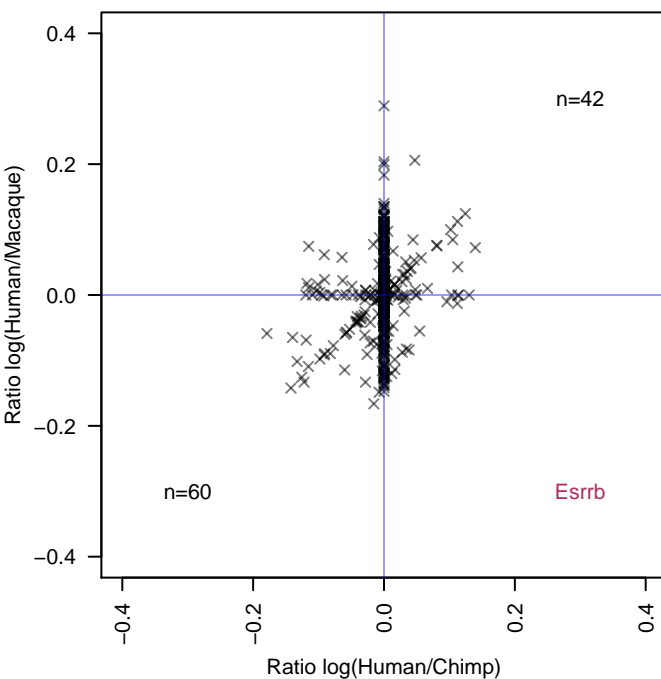

HumanDownFibroblast.final.bed

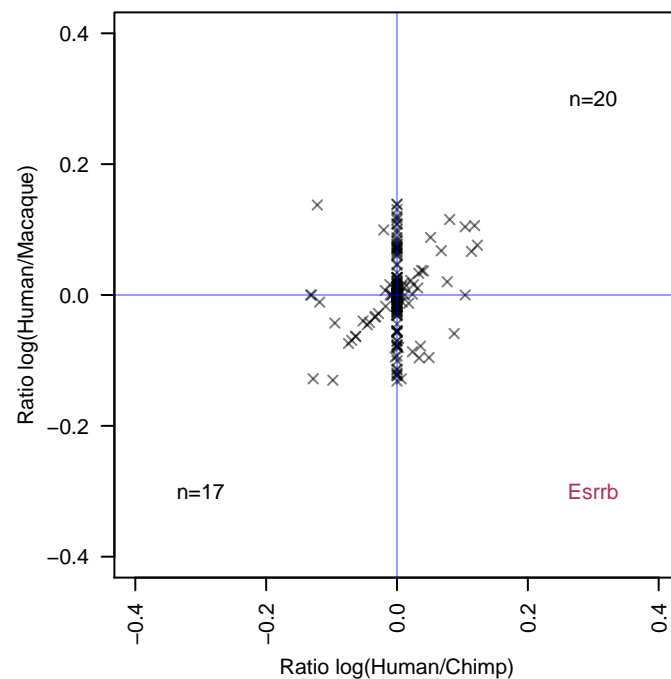

commonFibroblast.final.bed

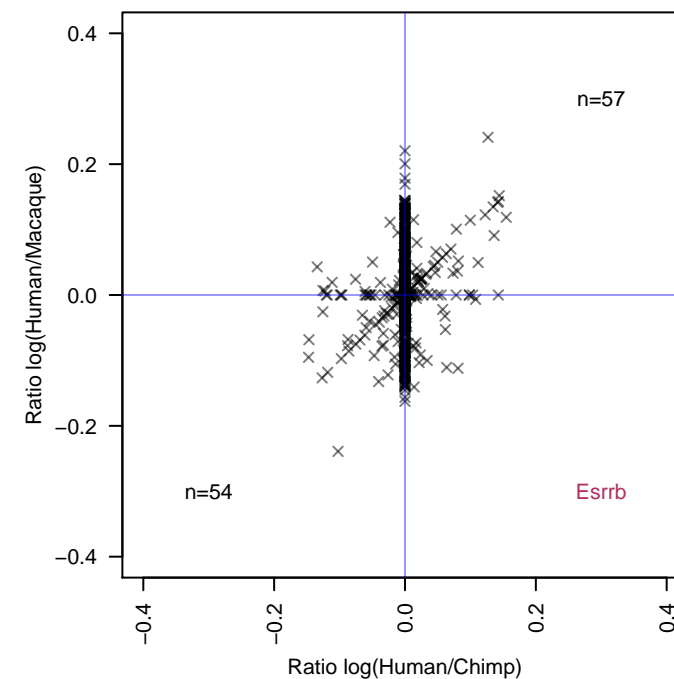

ChimpUpFibroblast.final.bed

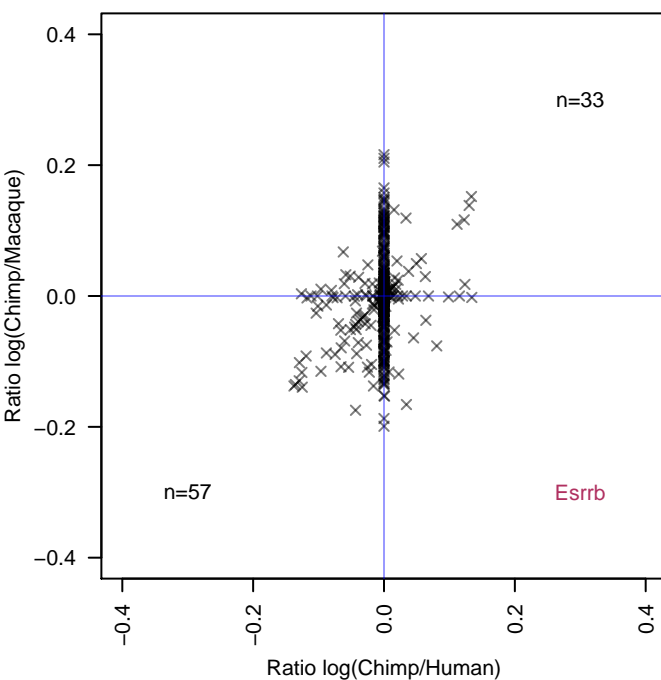

ChimpDownFibroblast.final.bed

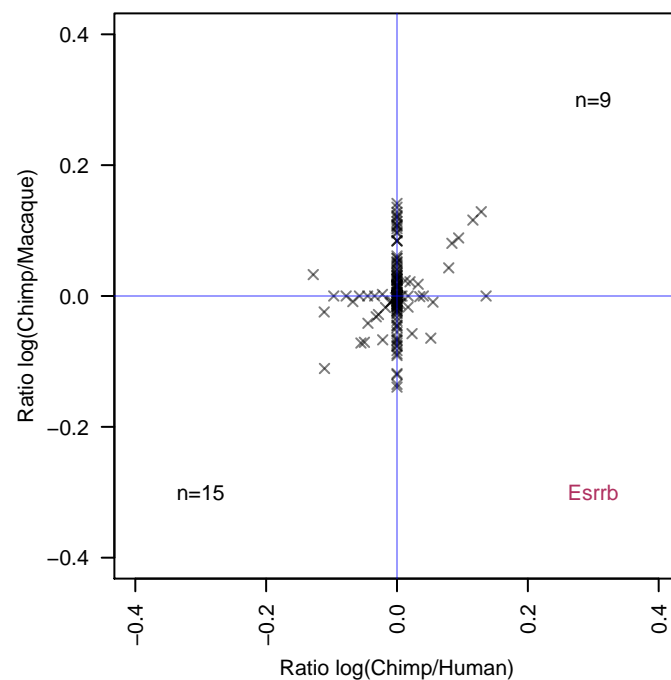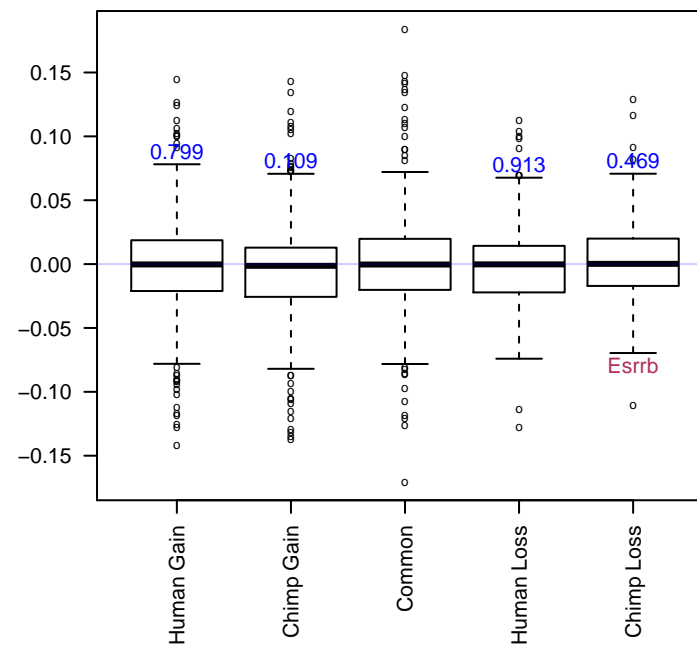

90 HumanUpFibroblast.final.bed

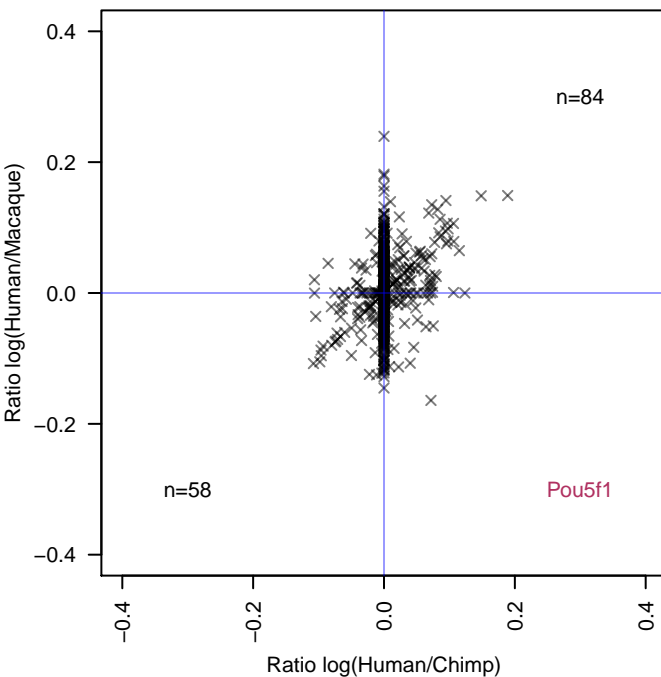

HumanDownFibroblast.final.bed

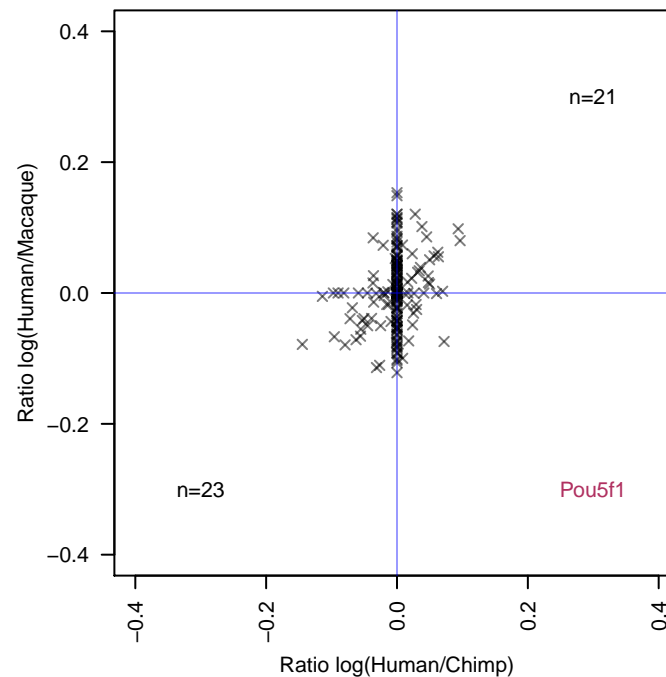

commonFibroblast.final.bed

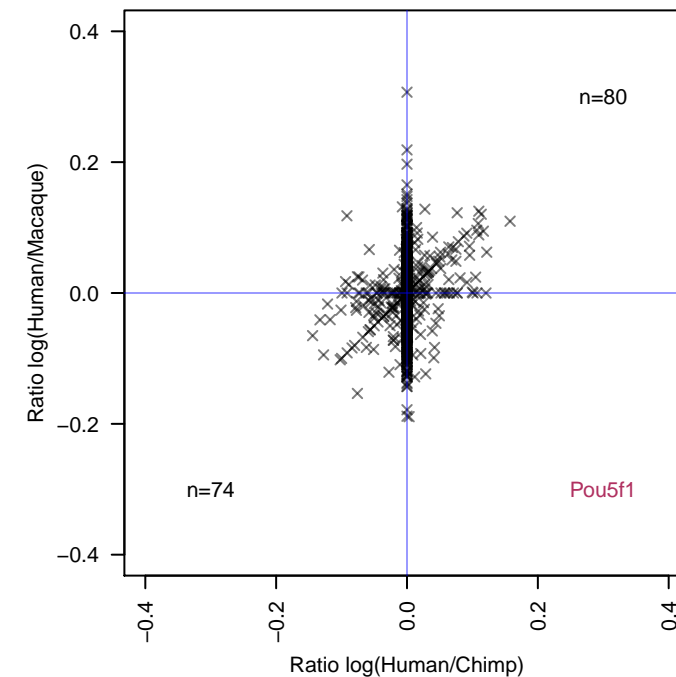

ChimpUpFibroblast.final.bed

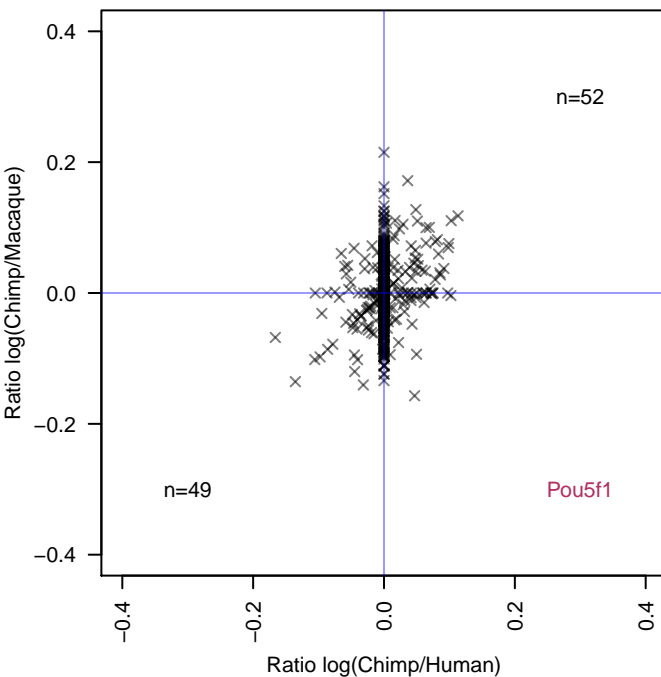

ChimpDownFibroblast.final.bed

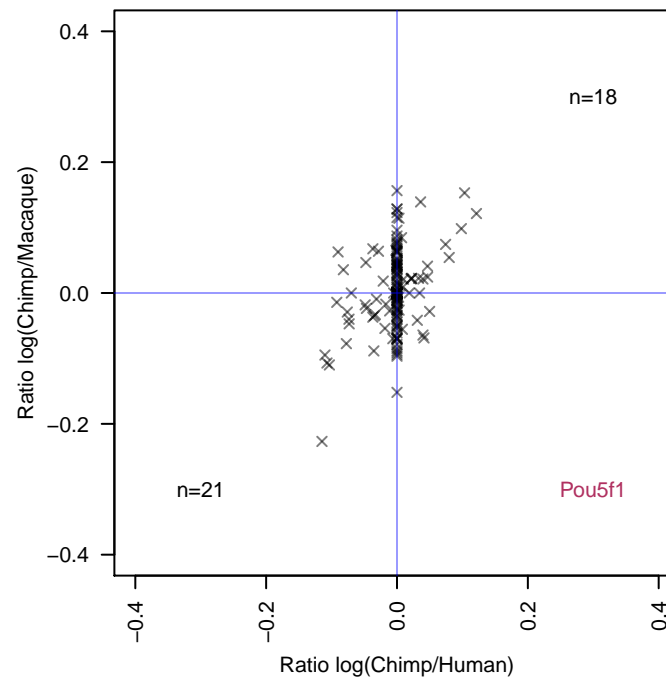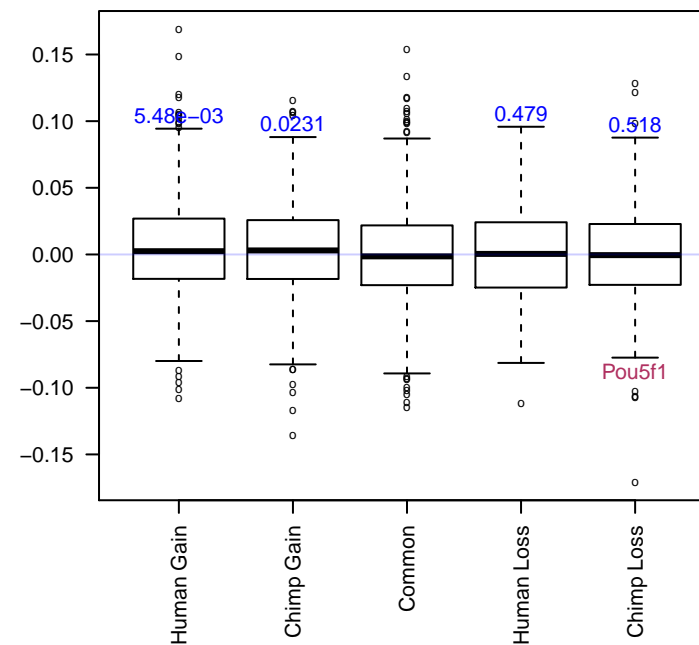

91

HumanUpFibroblast.final.bed

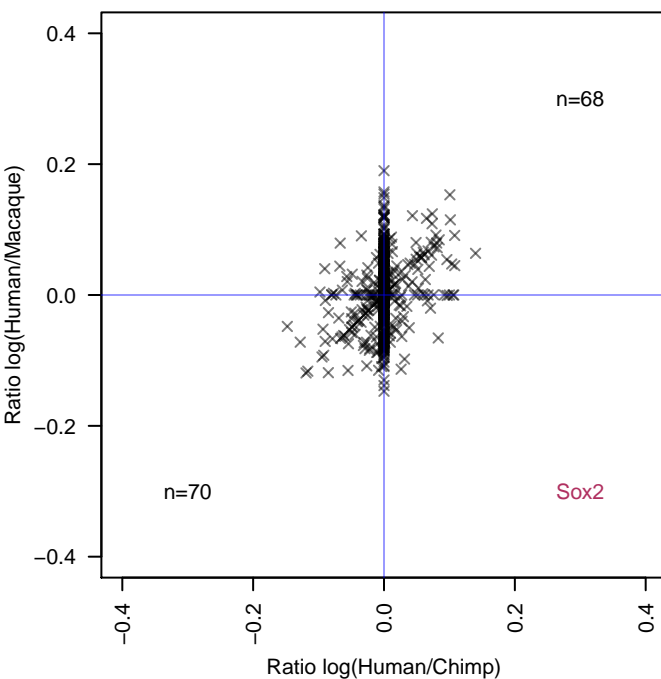

HumanDownFibroblast.final.bed

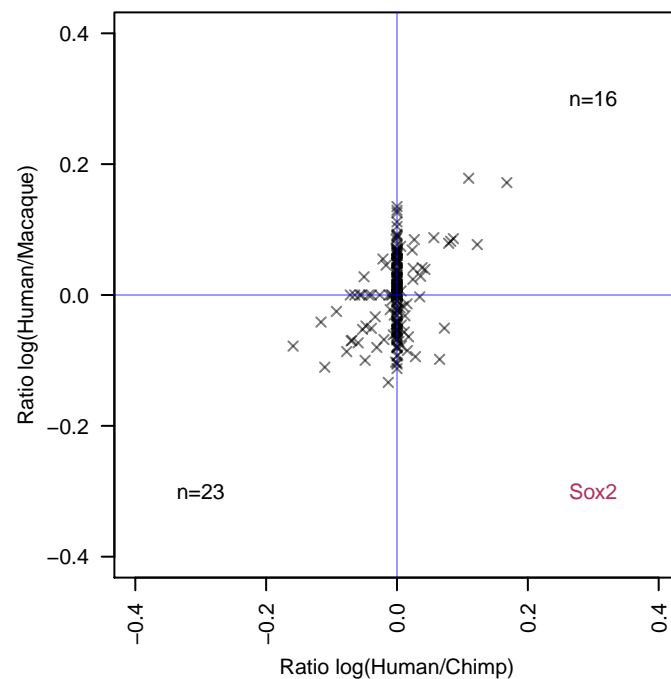

commonFibroblast.final.bed

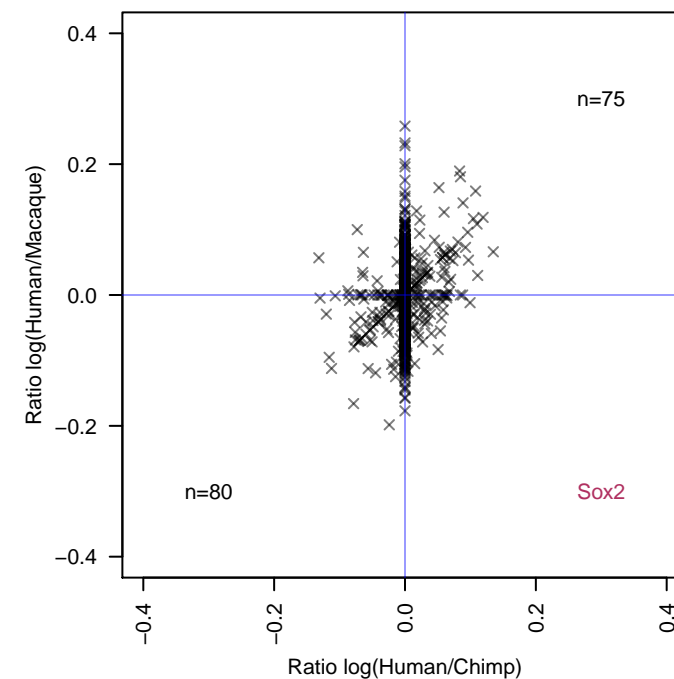

ChimpUpFibroblast.final.bed

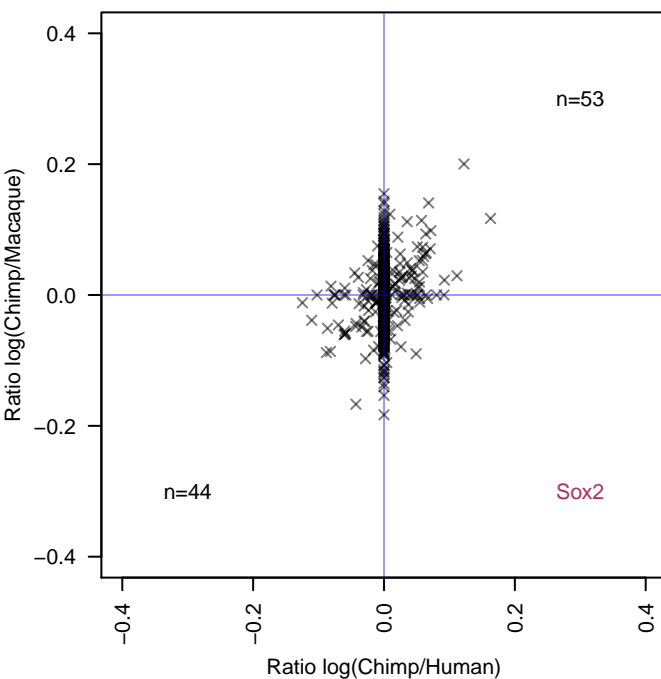

ChimpDownFibroblast.final.bed

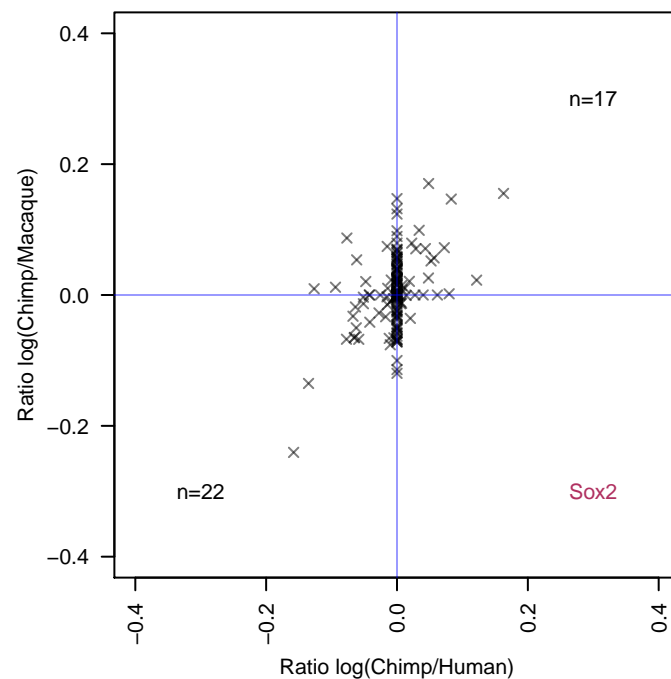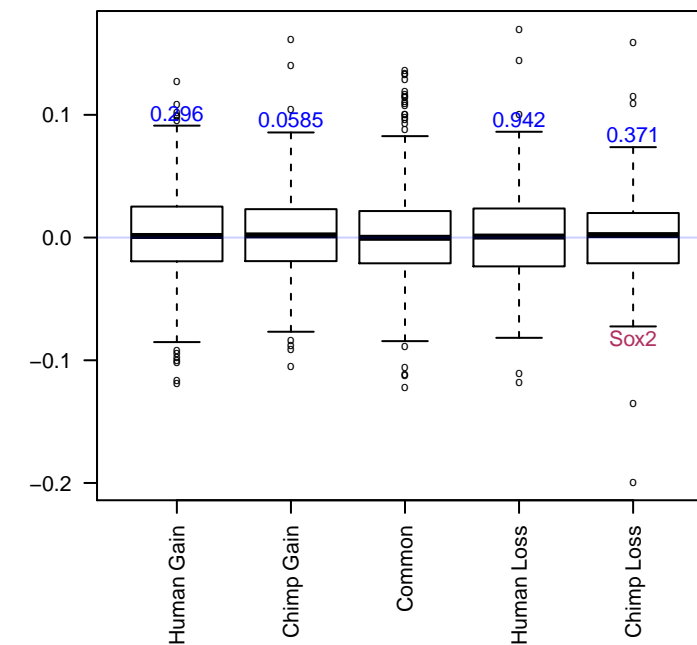

92

HumanUpFibroblast.final.bed

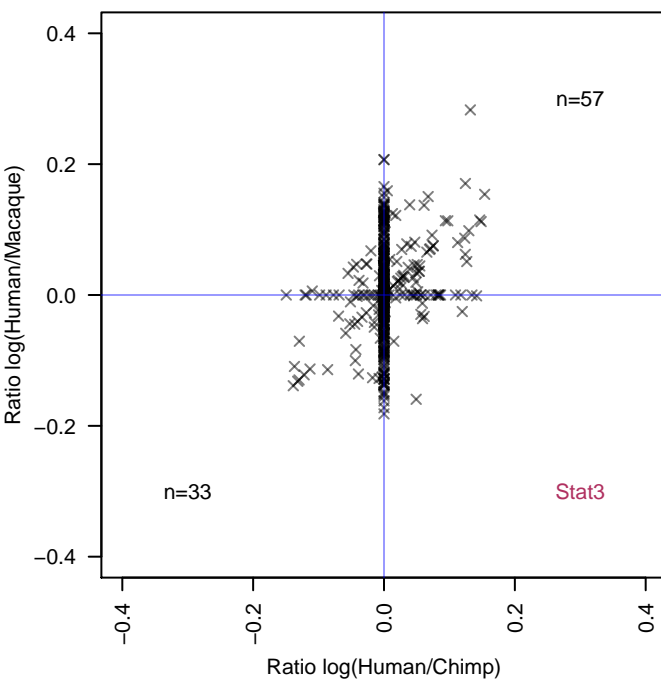

HumanDownFibroblast.final.bed

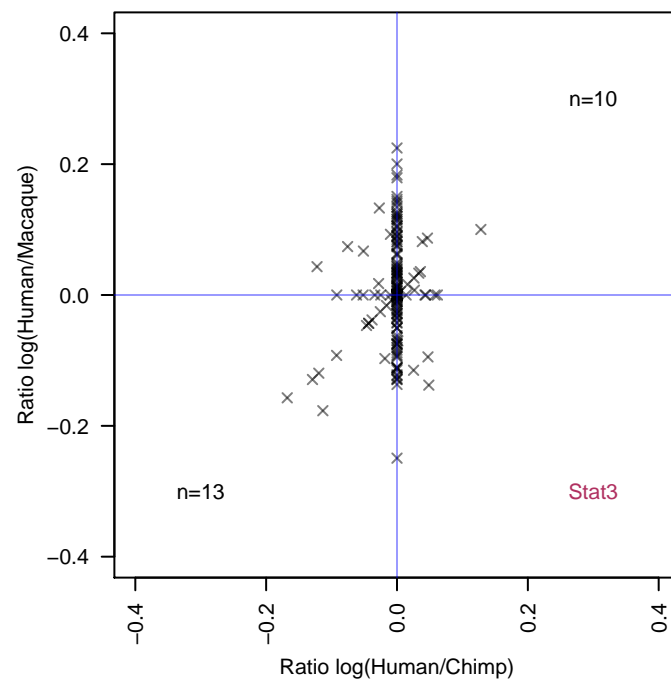

commonFibroblast.final.bed

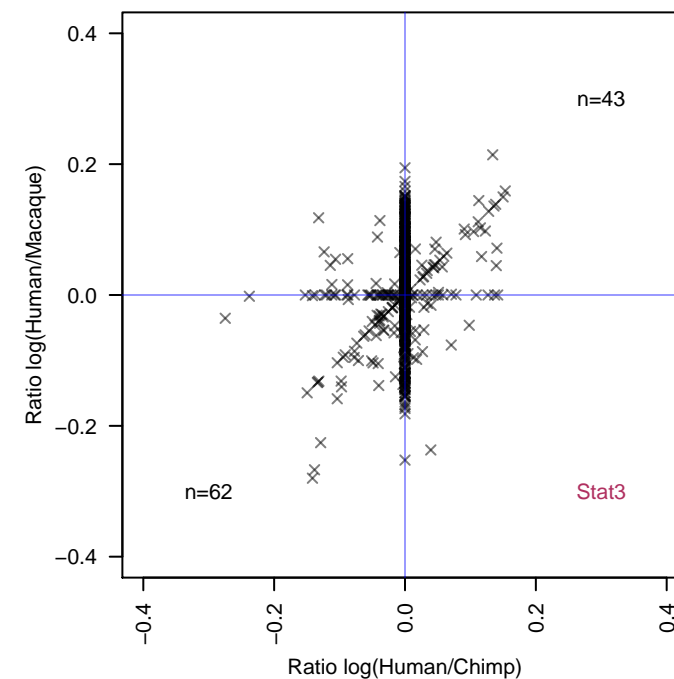

ChimpUpFibroblast.final.bed

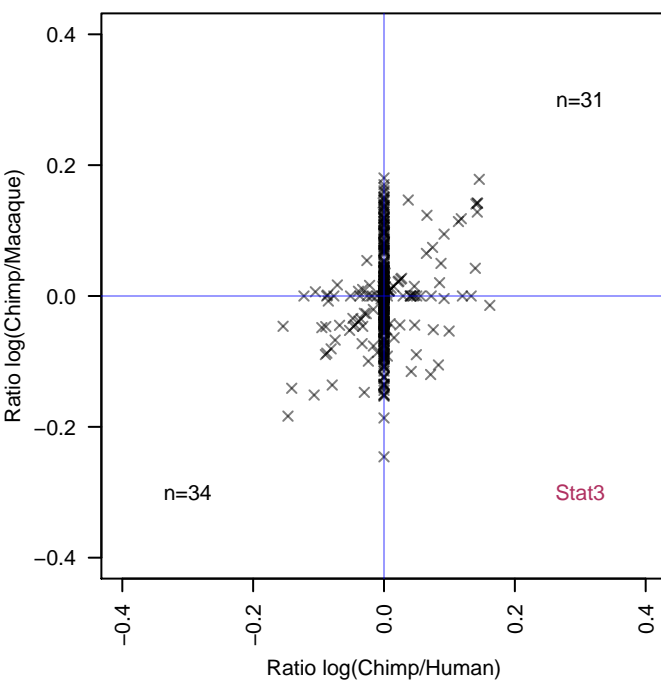

ChimpDownFibroblast.final.bed

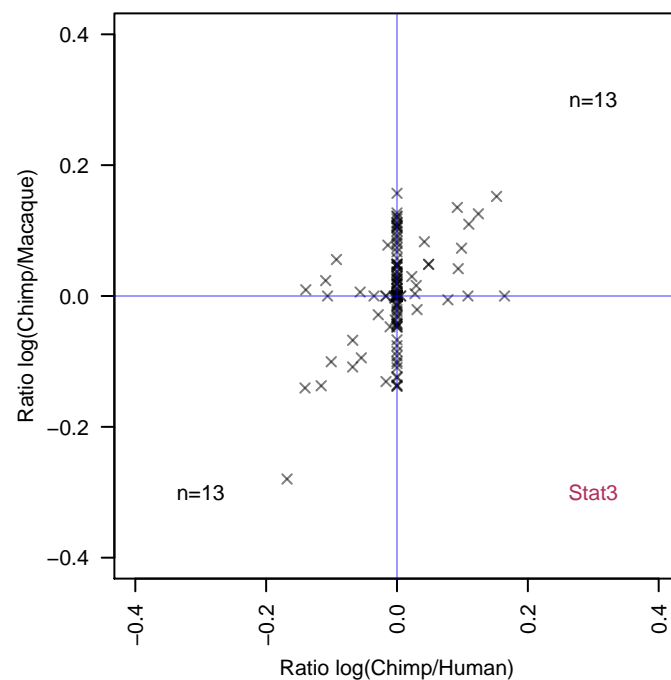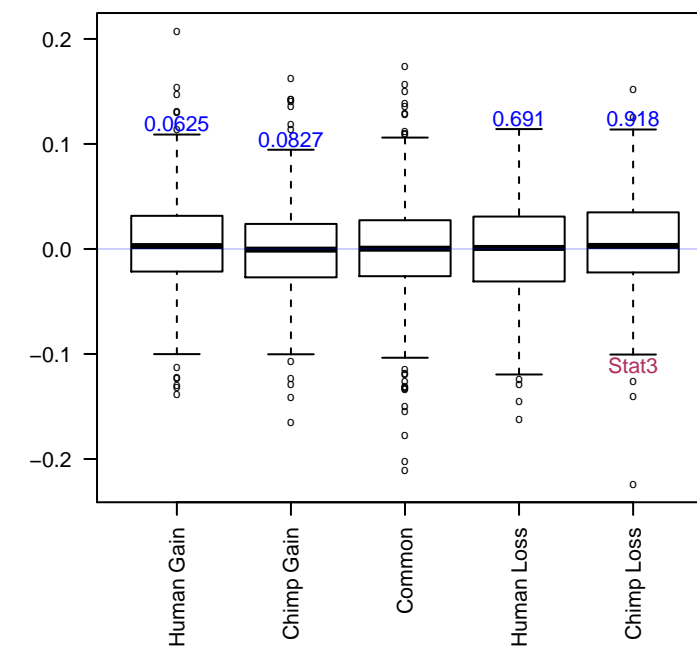

93

HumanUpFibroblast.final.bed

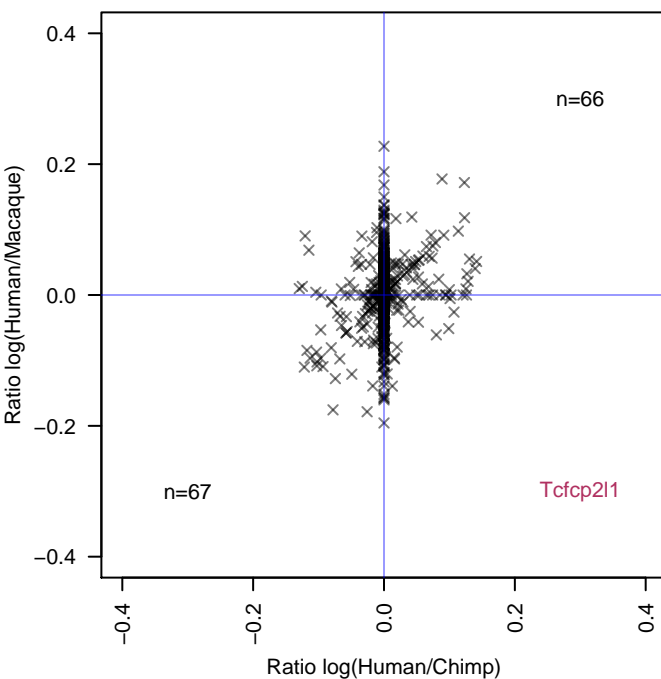

HumanDownFibroblast.final.bed

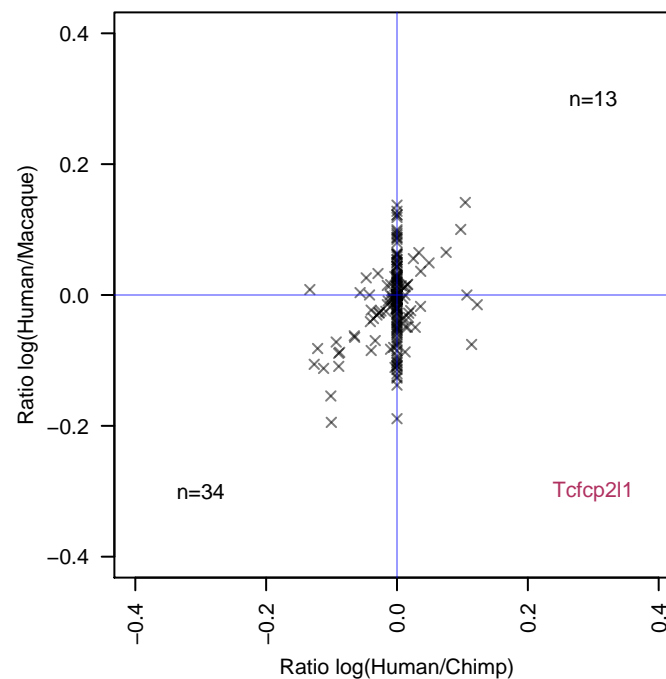

commonFibroblast.final.bed

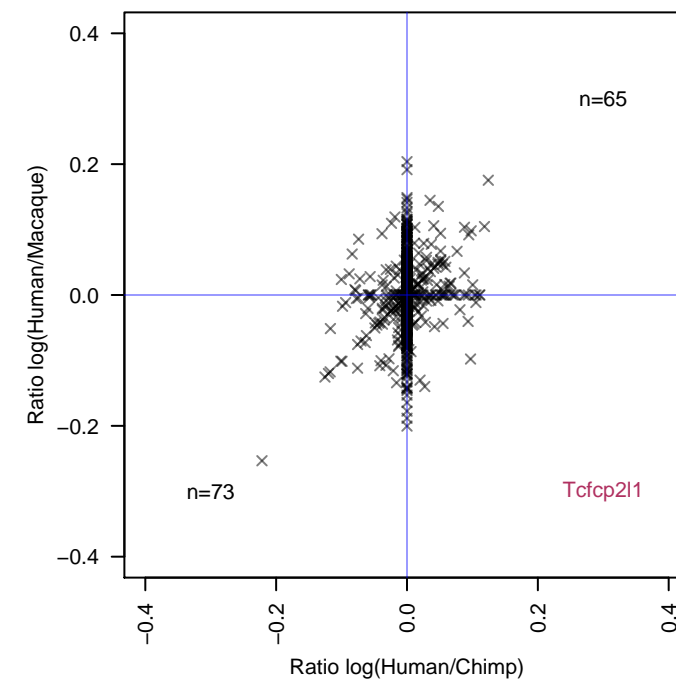

ChimpUpFibroblast.final.bed

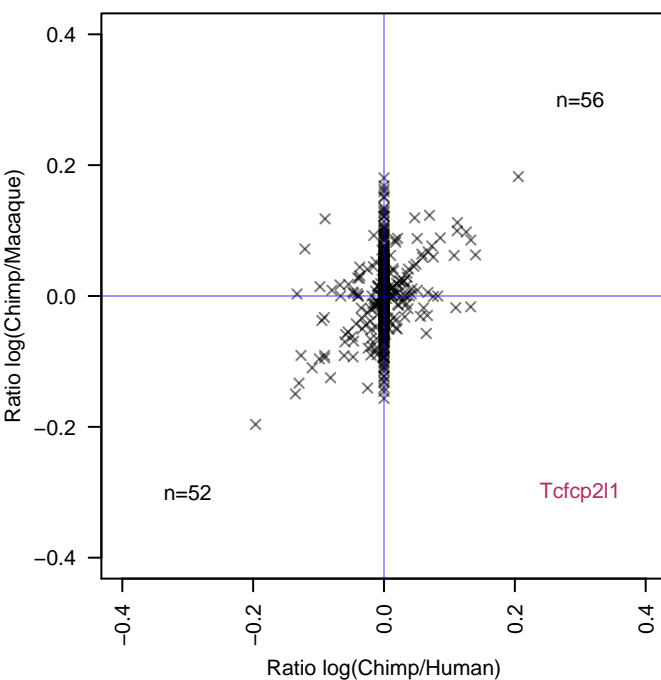

ChimpDownFibroblast.final.bed

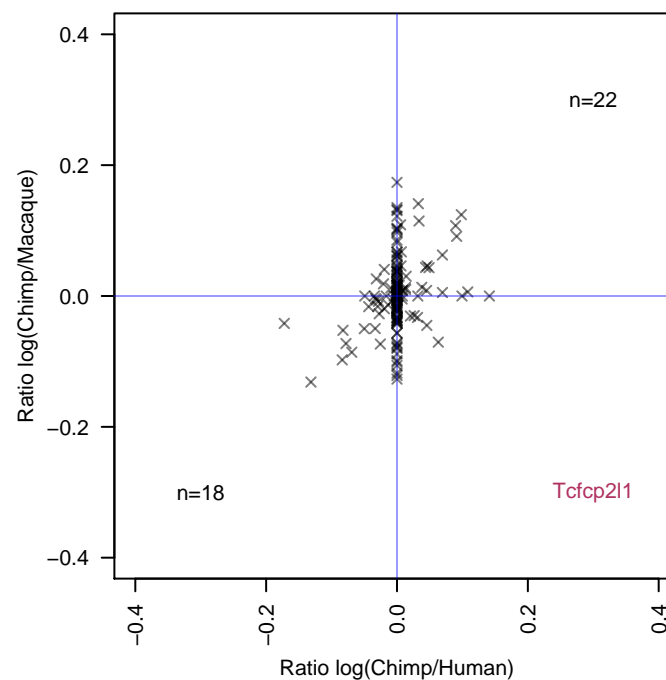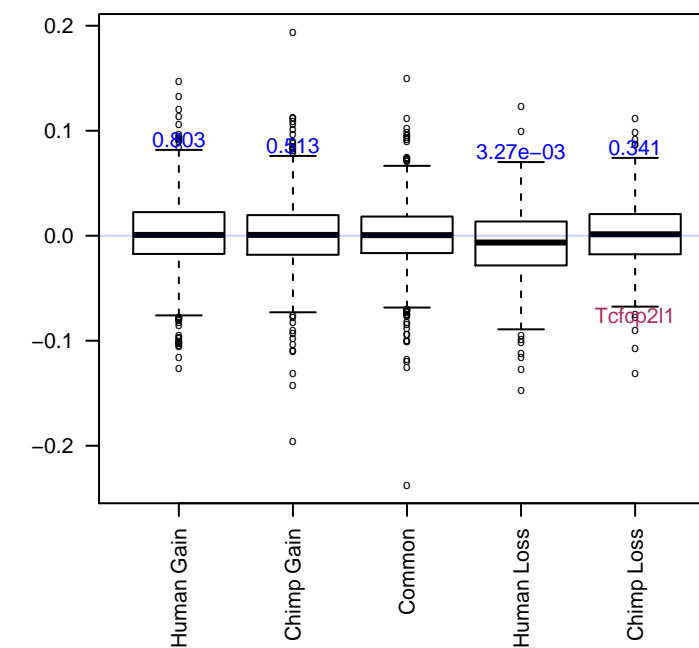

94

HumanUpFibroblast.final.bed

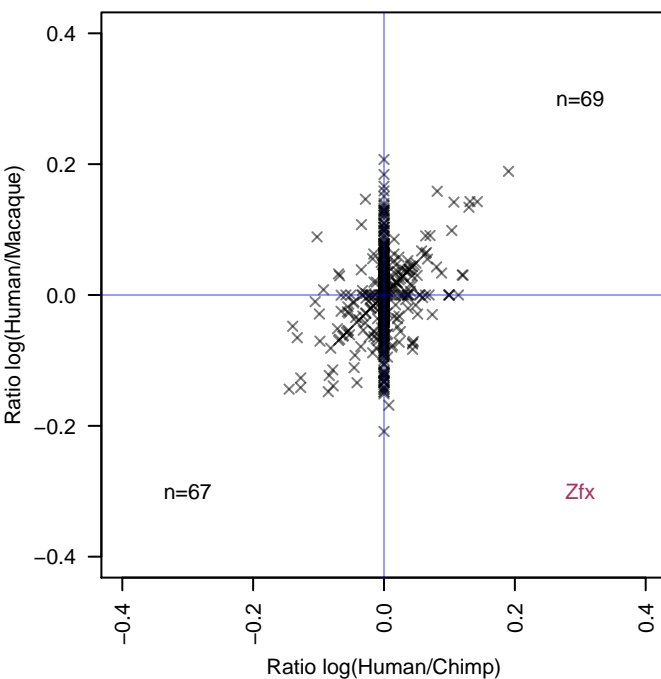

HumanDownFibroblast.final.bed

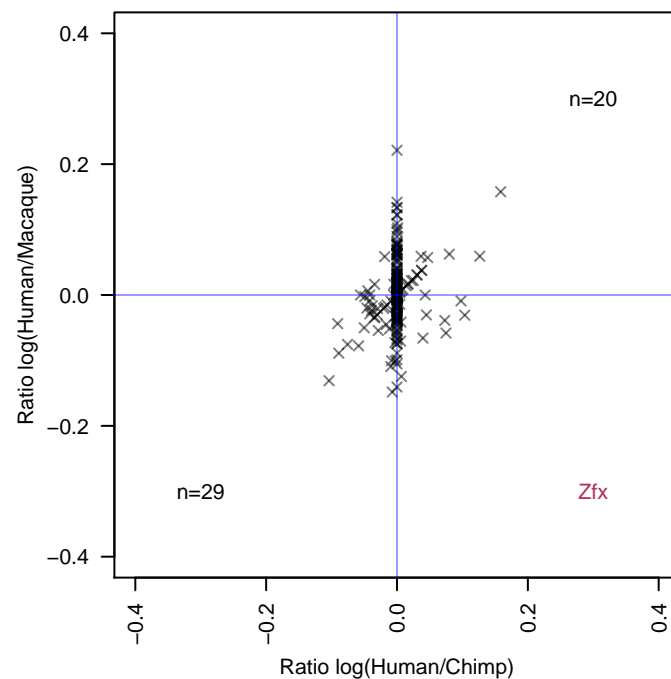

commonFibroblast.final.bed

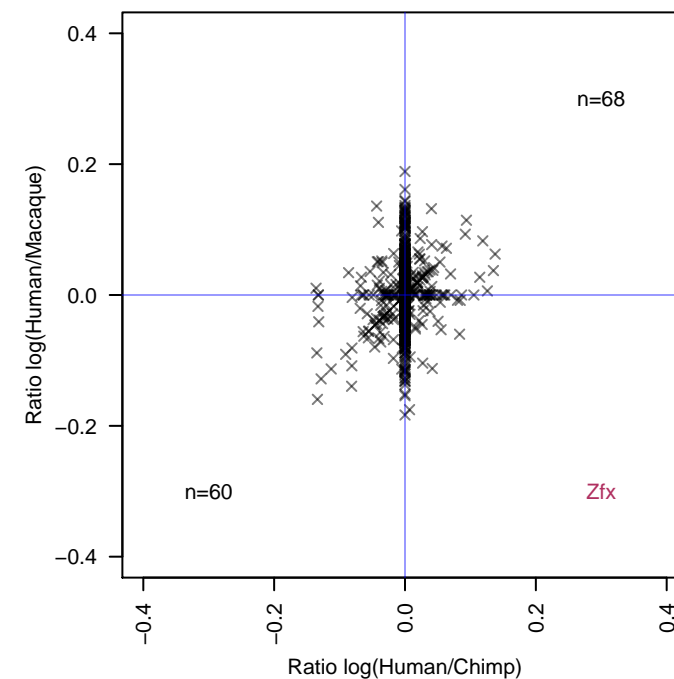

ChimpUpFibroblast.final.bed

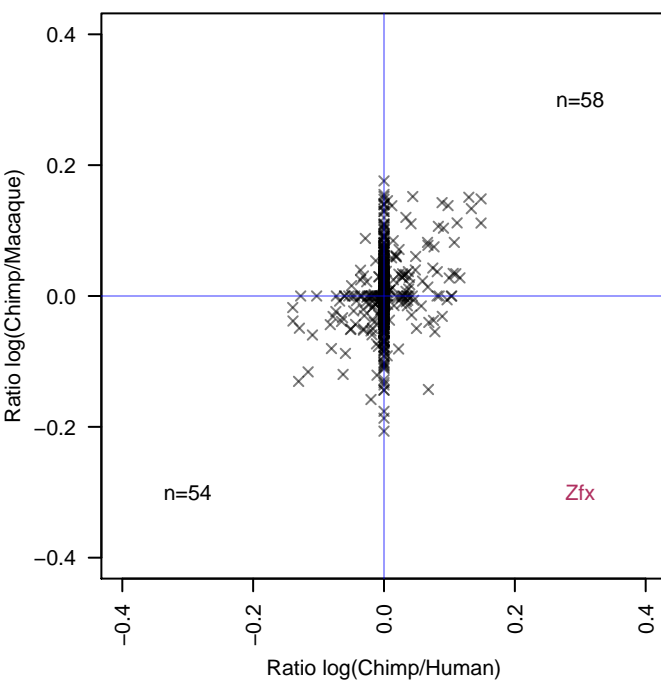

ChimpDownFibroblast.final.bed

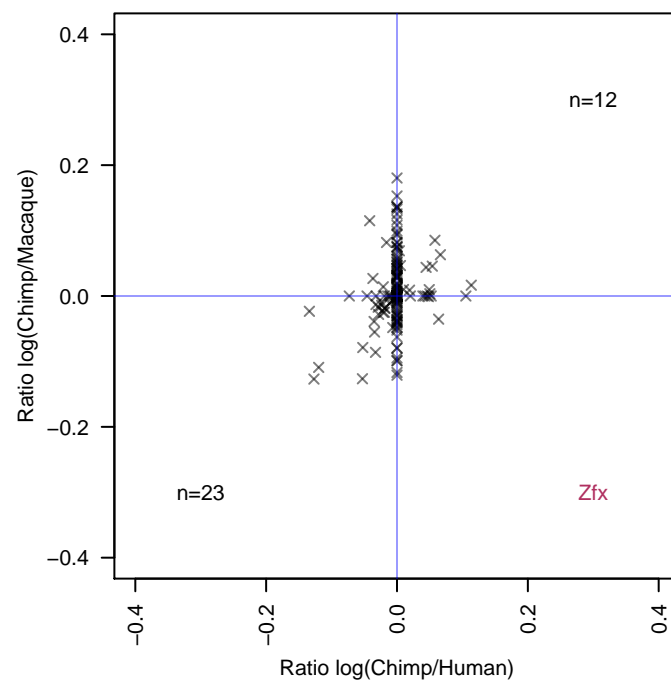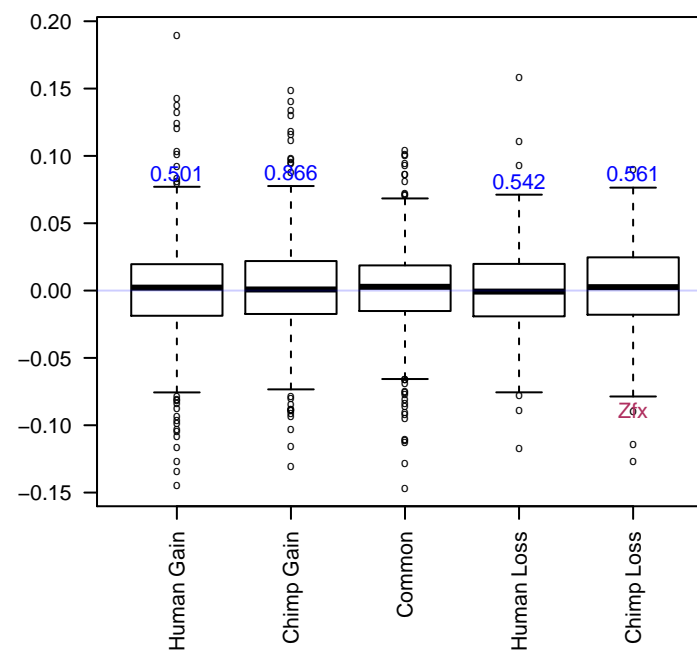

95

HumanUpFibroblast.final.bed

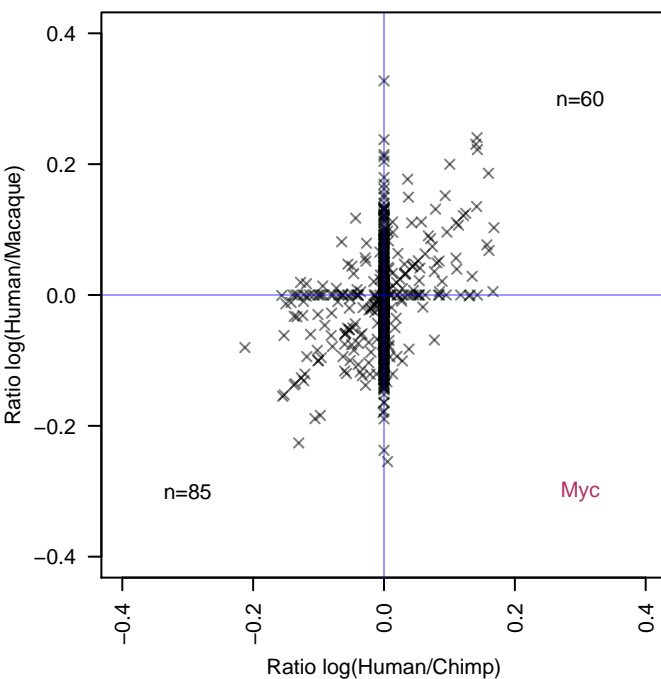

HumanDownFibroblast.final.bed

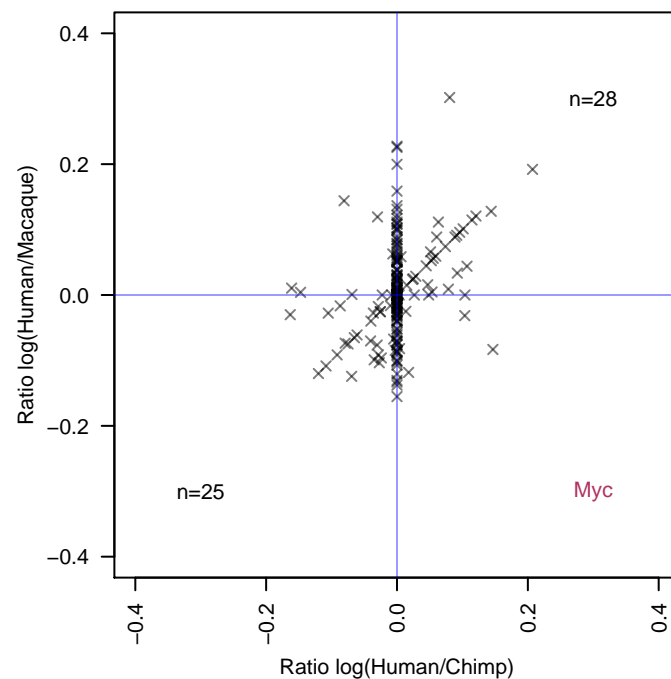

commonFibroblast.final.bed

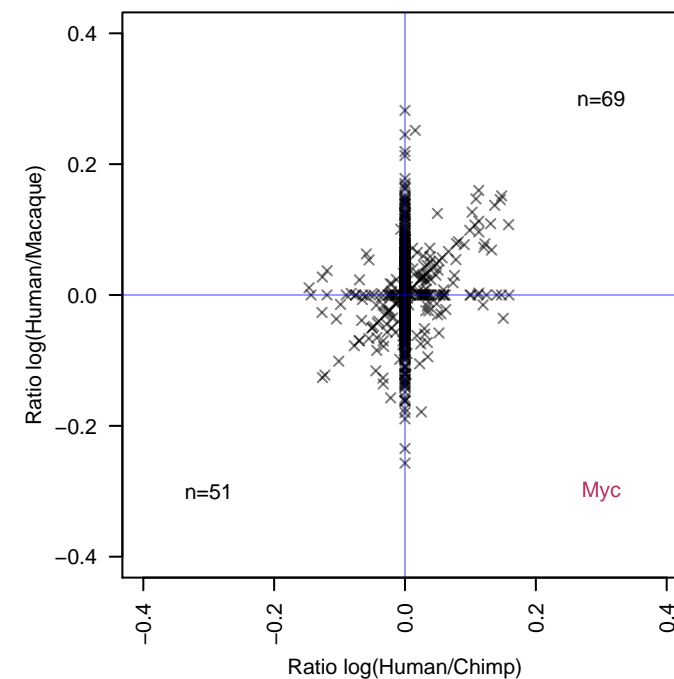

ChimpUpFibroblast.final.bed

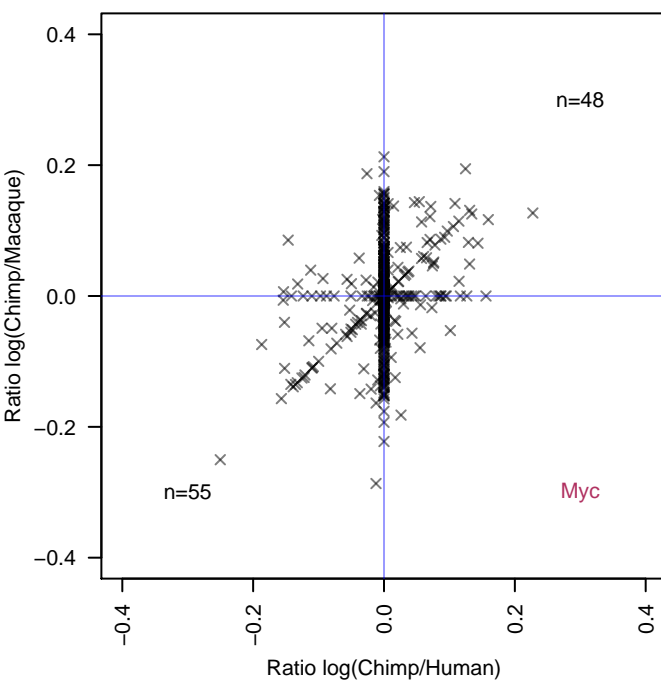

ChimpDownFibroblast.final.bed

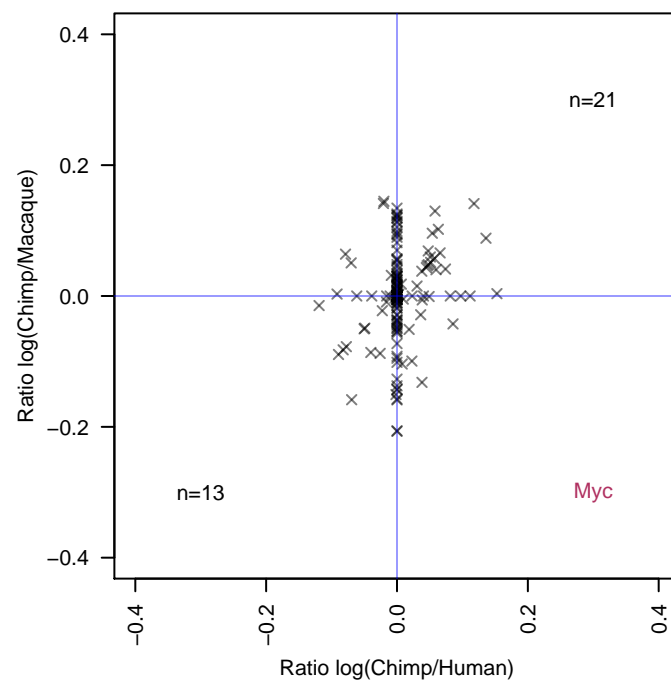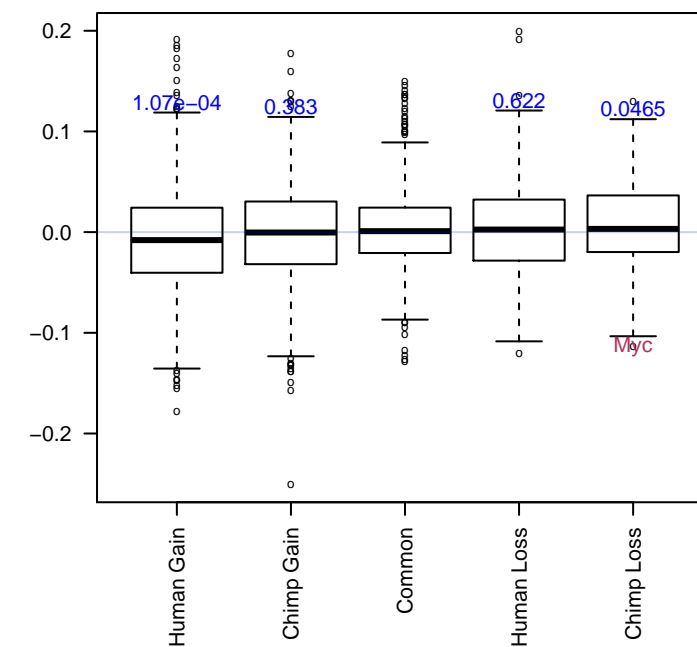

96

HumanUpFibroblast.final.bed

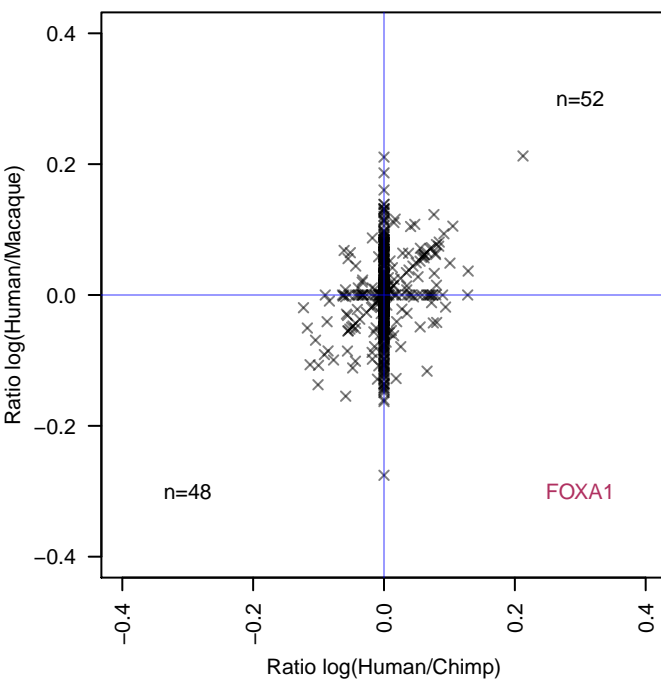

HumanDownFibroblast.final.bed

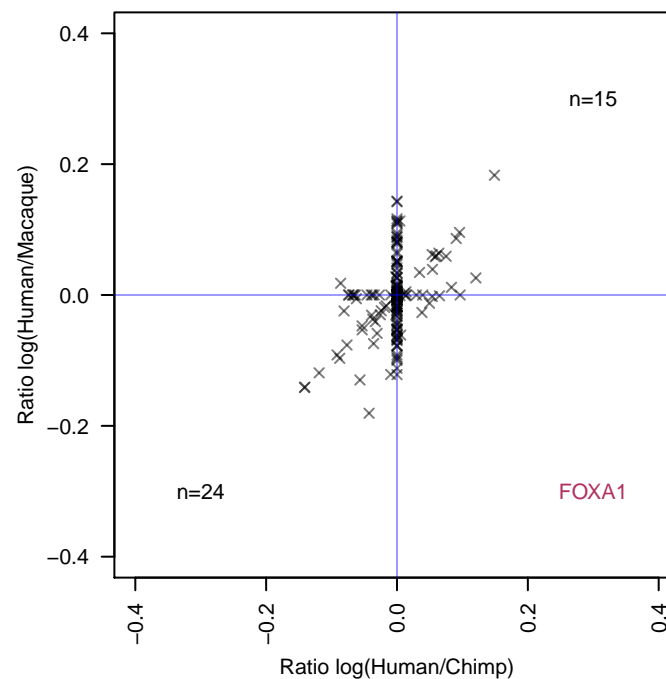

commonFibroblast.final.bed

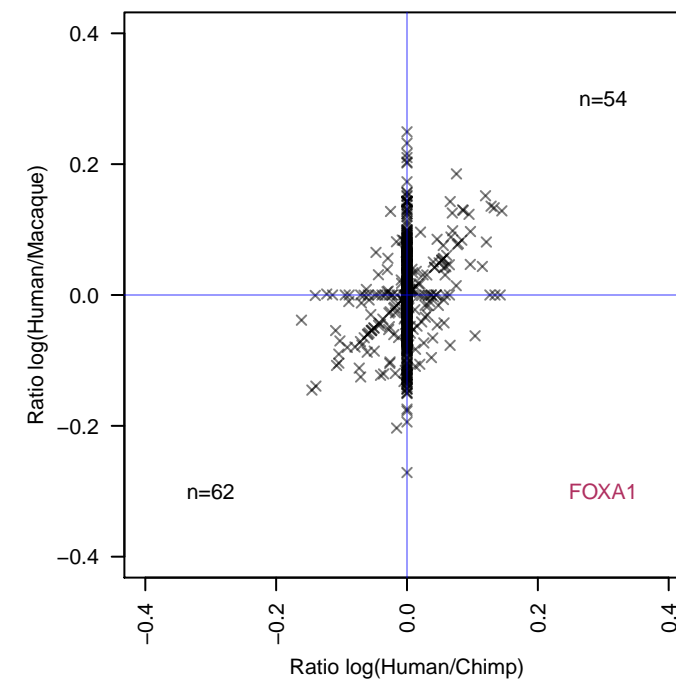

ChimpUpFibroblast.final.bed

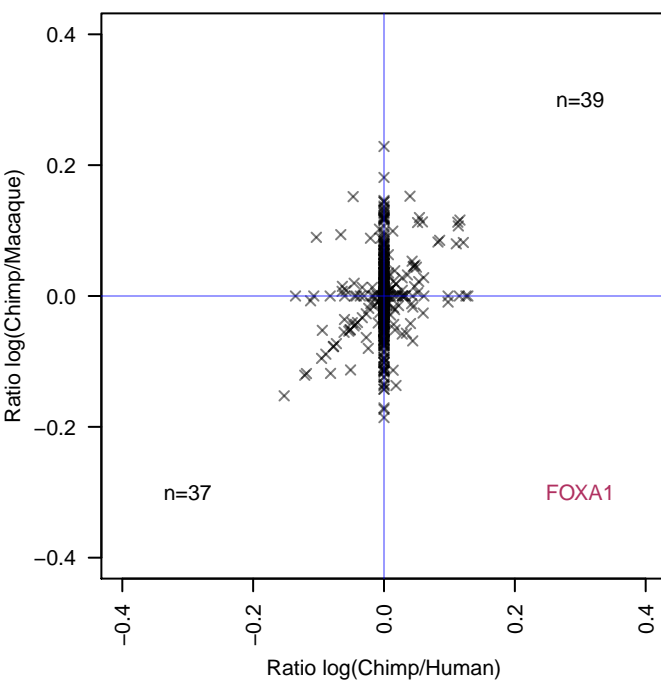

ChimpDownFibroblast.final.bed

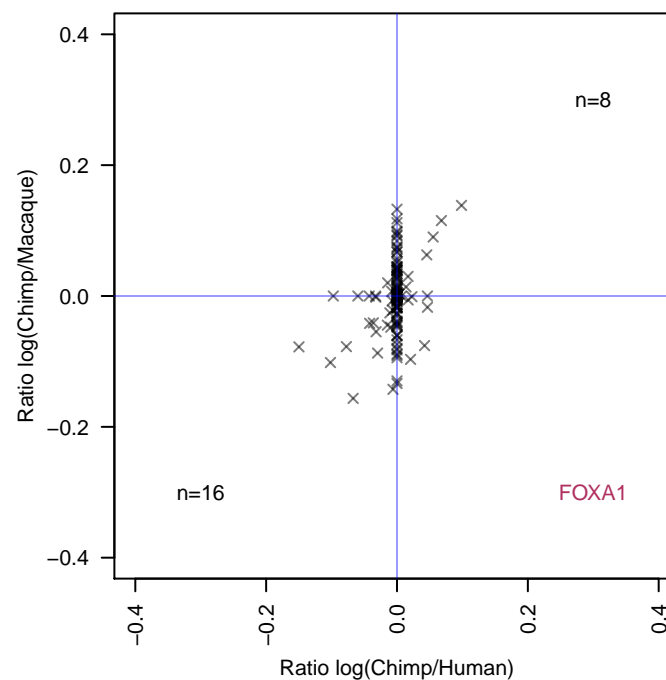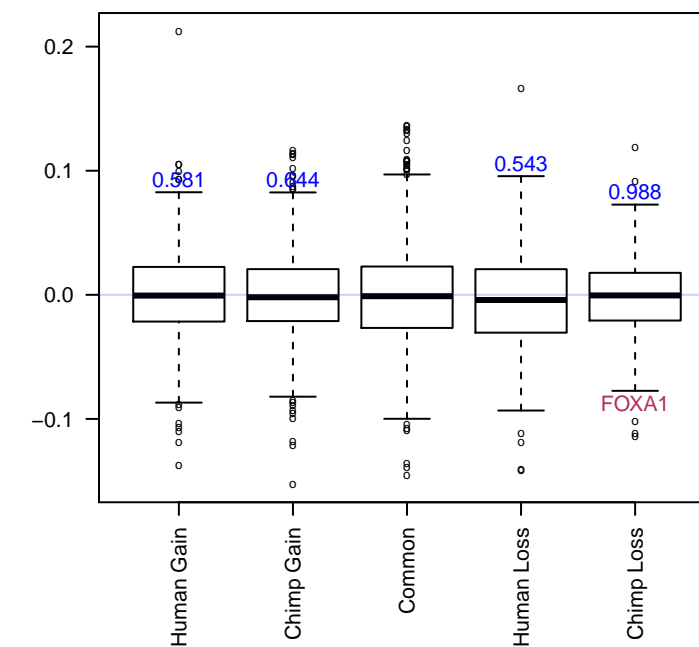

97

HumanUpFibroblast.final.bed

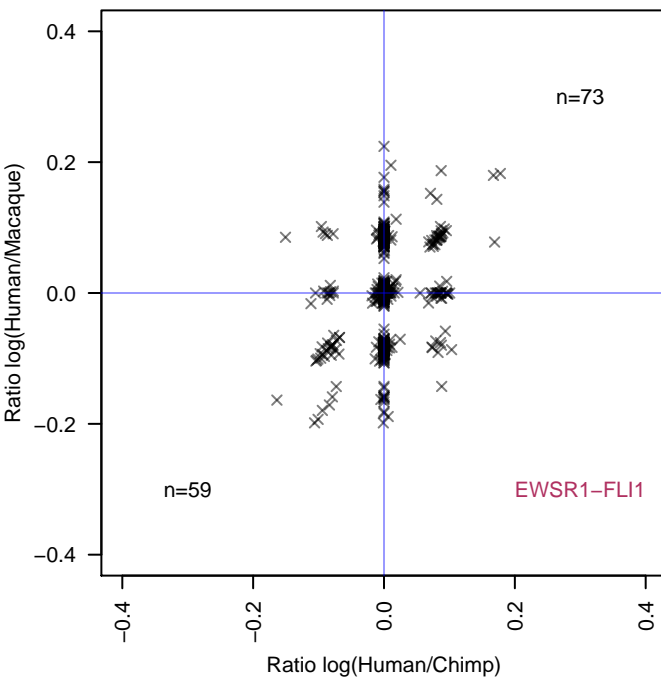

HumanDownFibroblast.final.bed

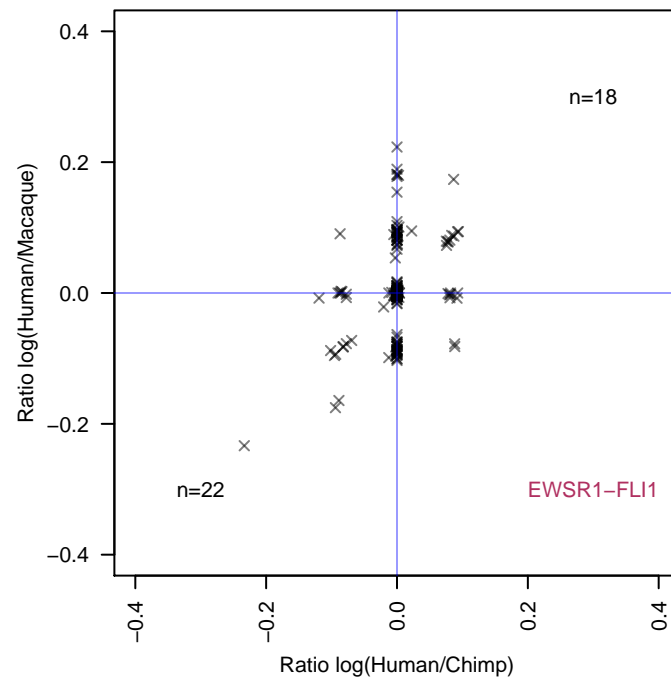

commonFibroblast.final.bed

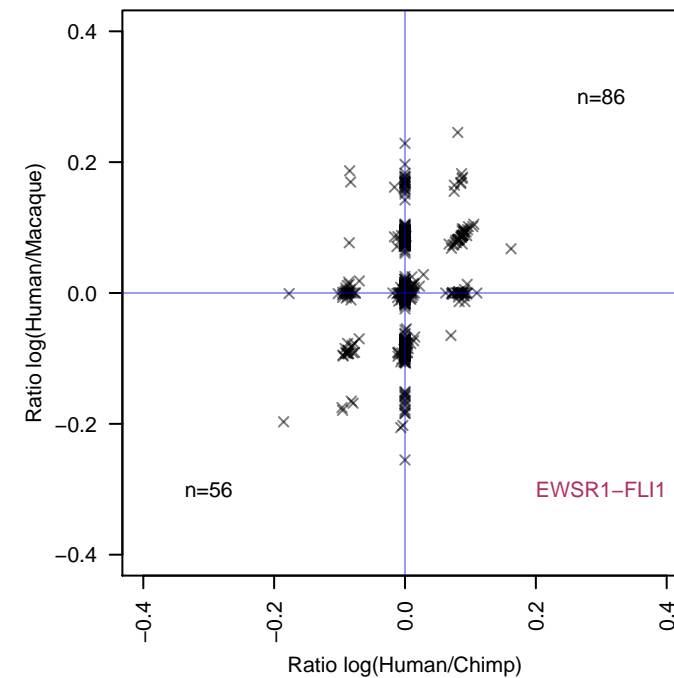

ChimpUpFibroblast.final.bed

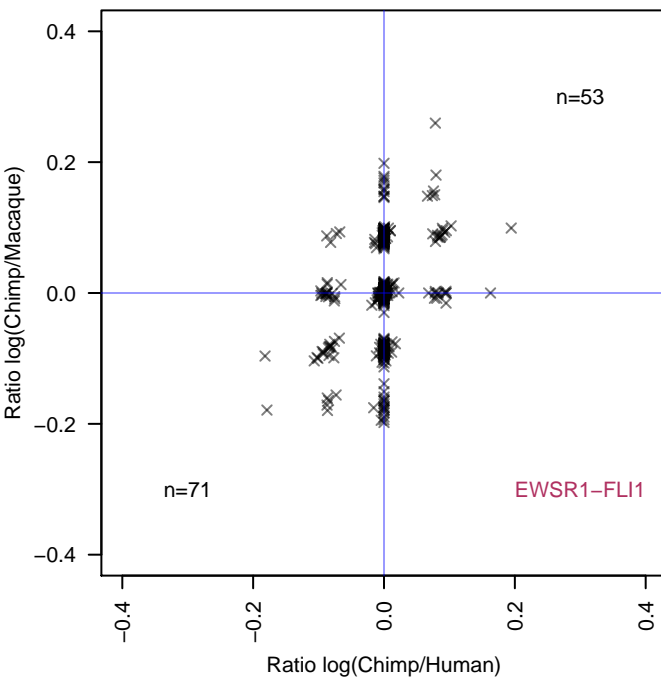

ChimpDownFibroblast.final.bed

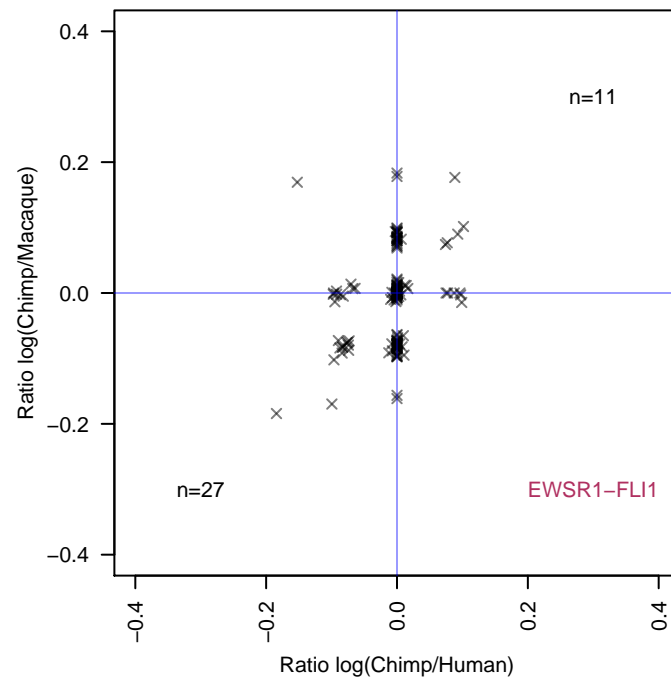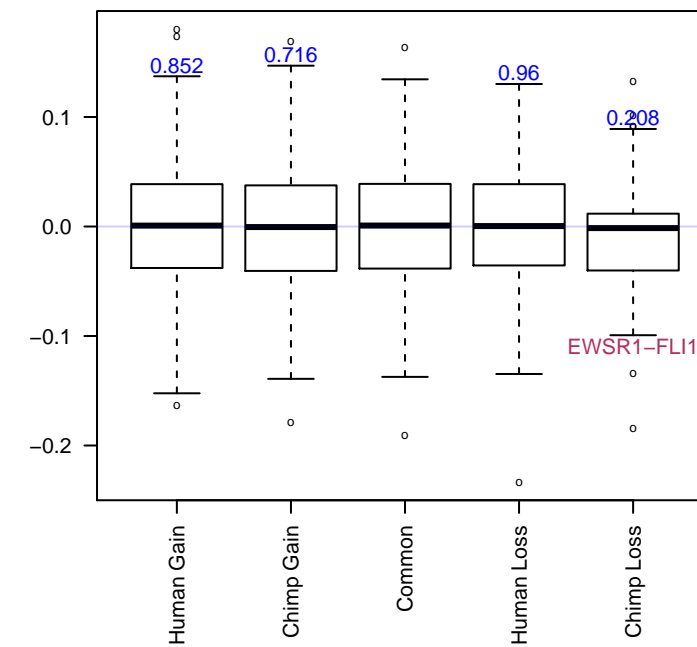

98

HumanUpFibroblast.final.bed

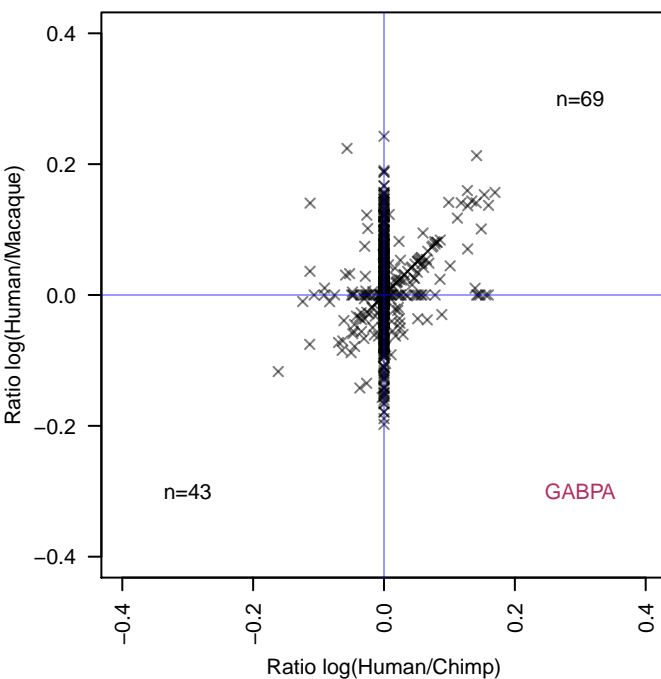

HumanDownFibroblast.final.bed

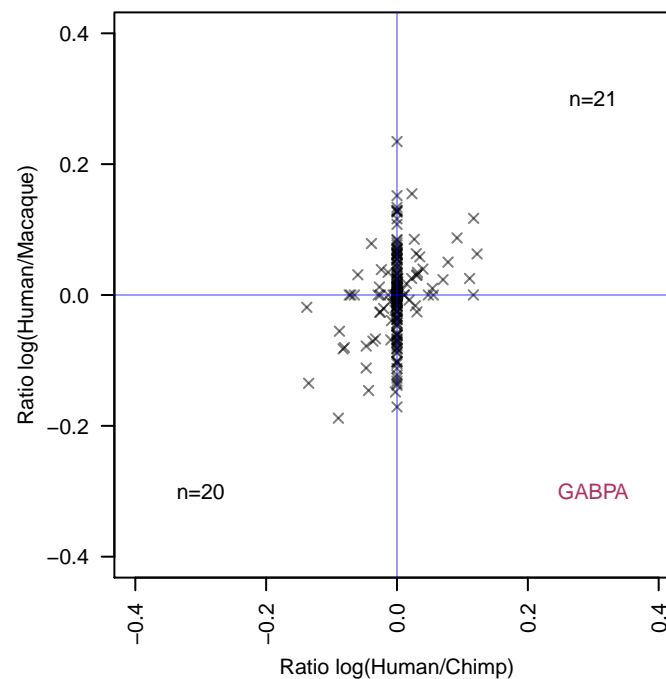

commonFibroblast.final.bed

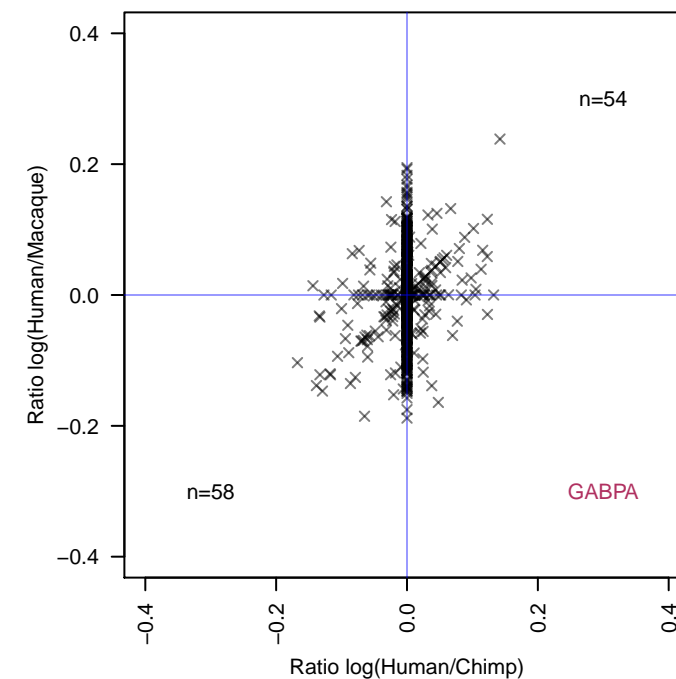

ChimpUpFibroblast.final.bed

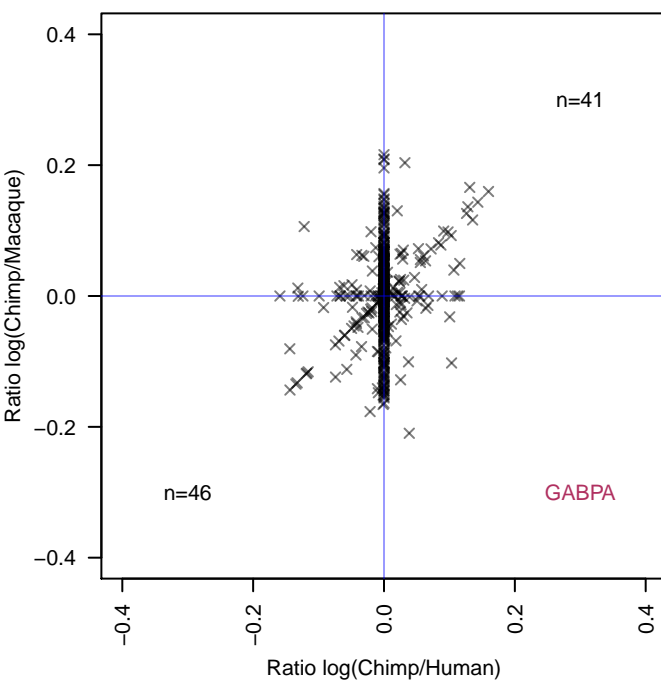

ChimpDownFibroblast.final.bed

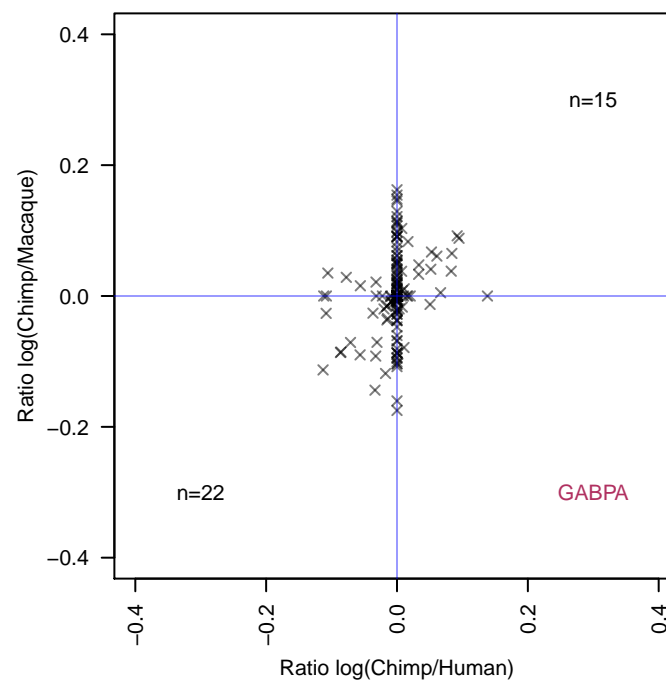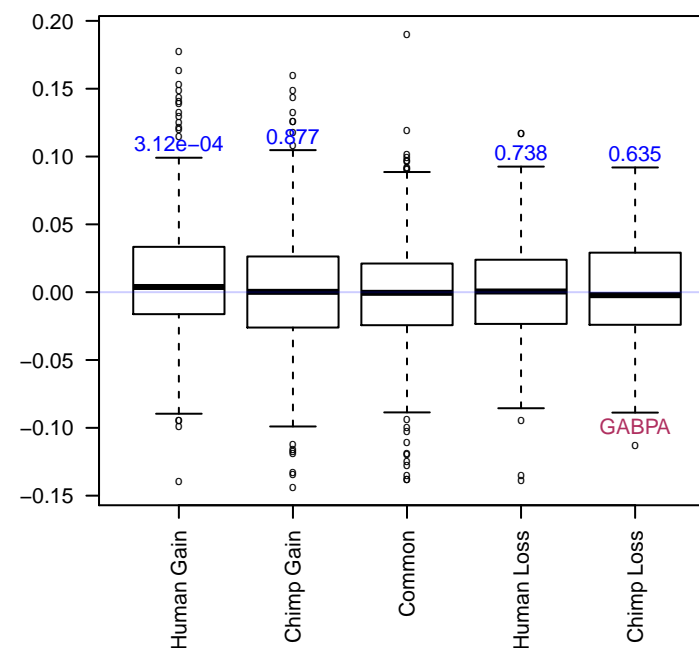

99 HumanUpFibroblast.final.bed

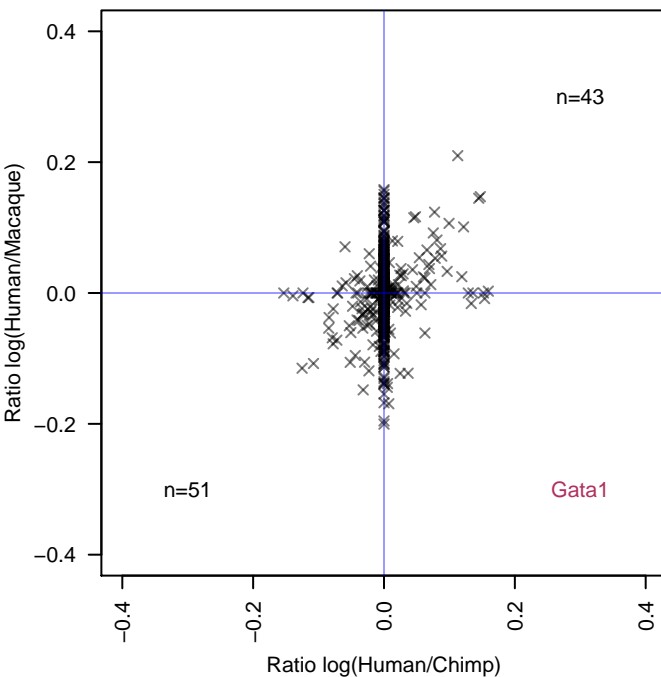

HumanDownFibroblast.final.bed

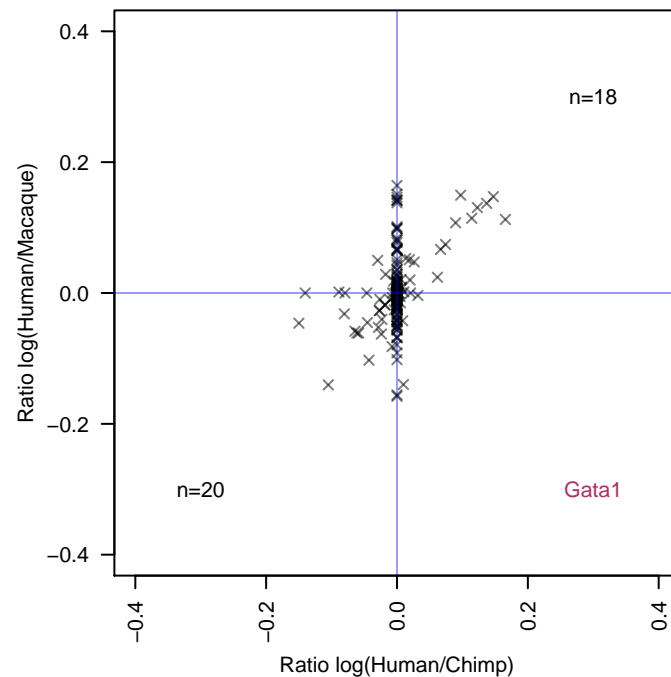

commonFibroblast.final.bed

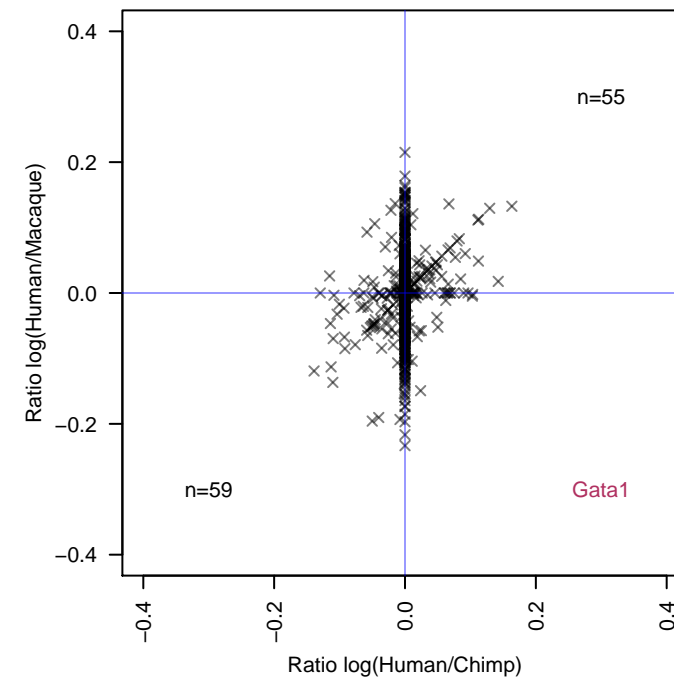

ChimpUpFibroblast.final.bed

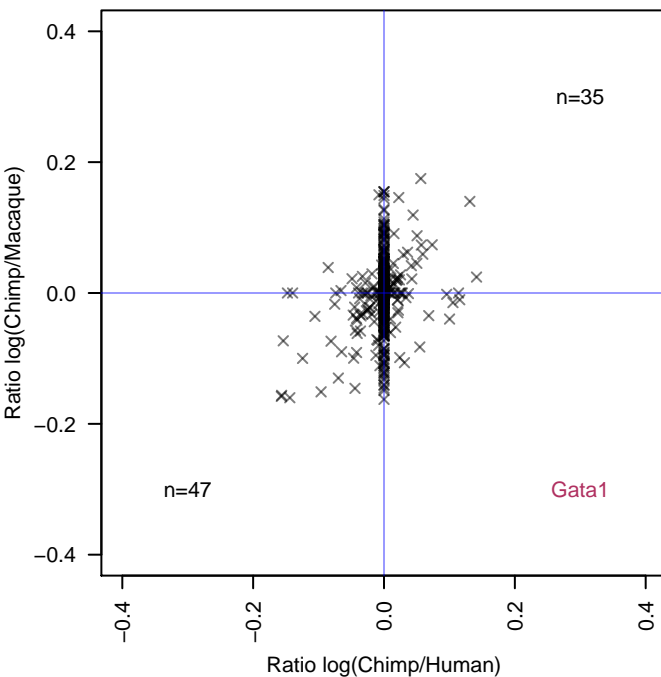

ChimpDownFibroblast.final.bed

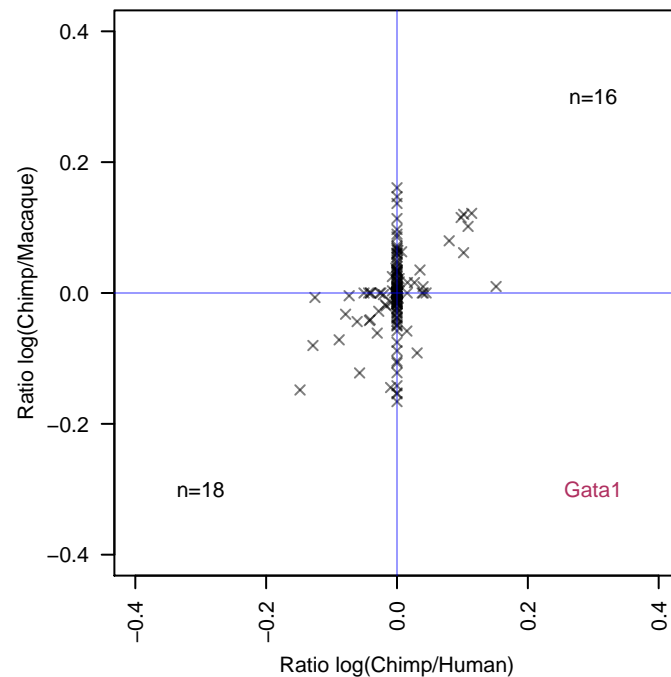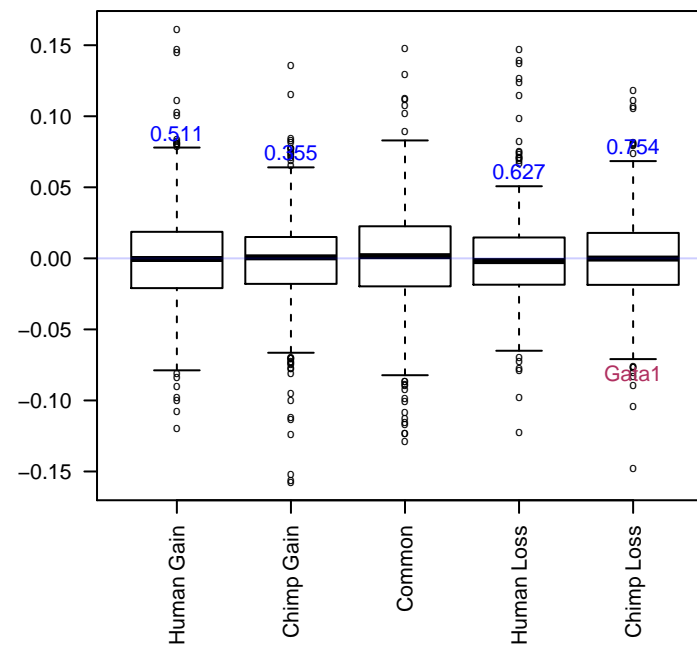

100 HumanUpFibroblast.final.bed

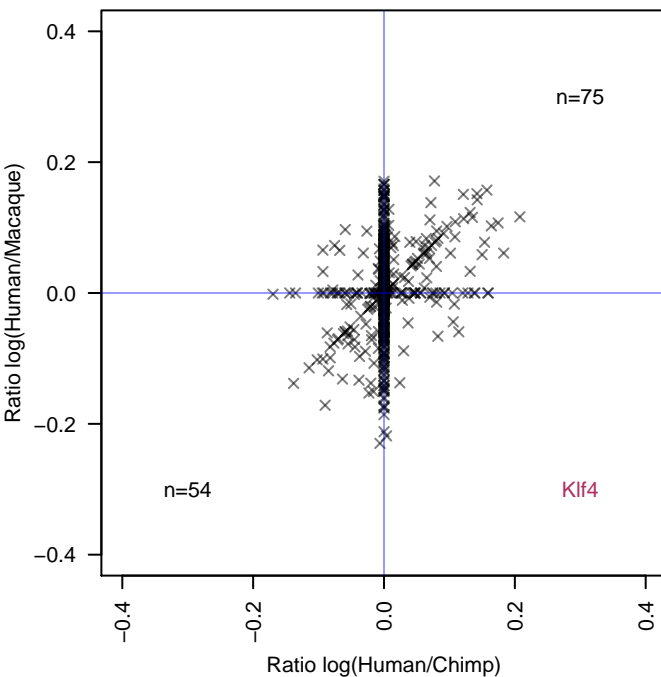

HumanDownFibroblast.final.bed

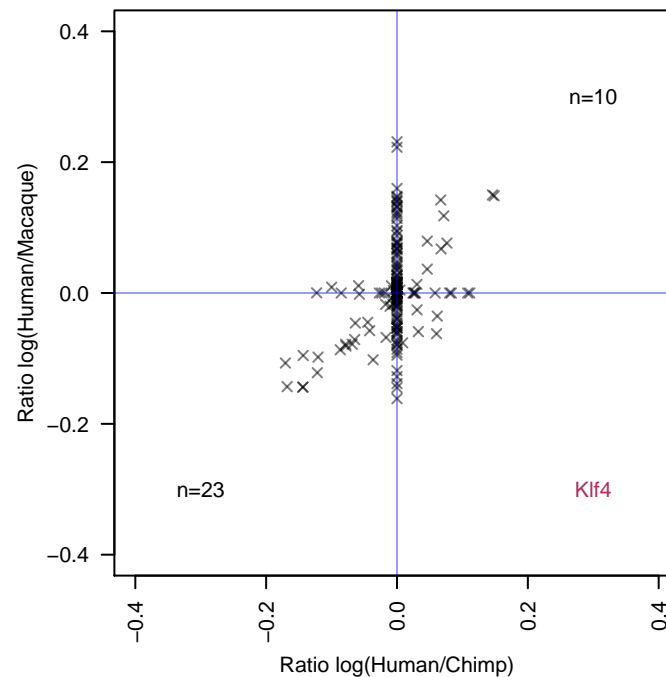

commonFibroblast.final.bed

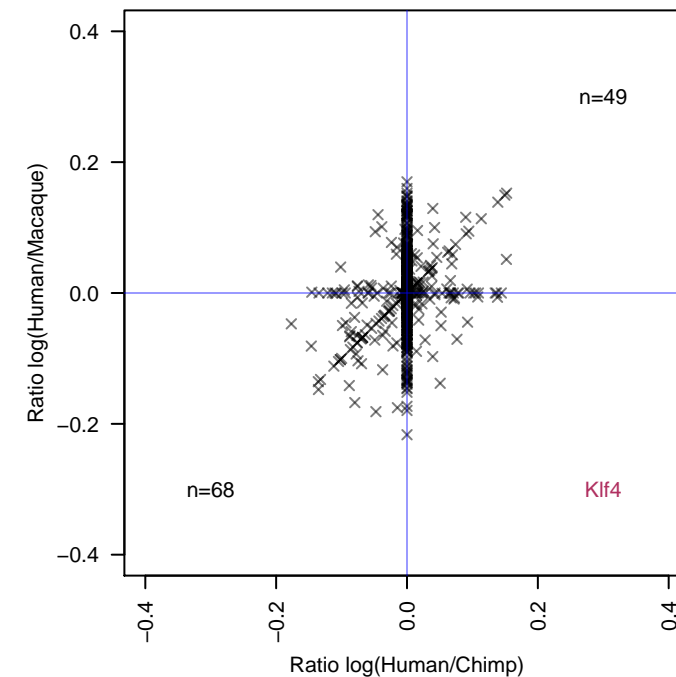

ChimpUpFibroblast.final.bed

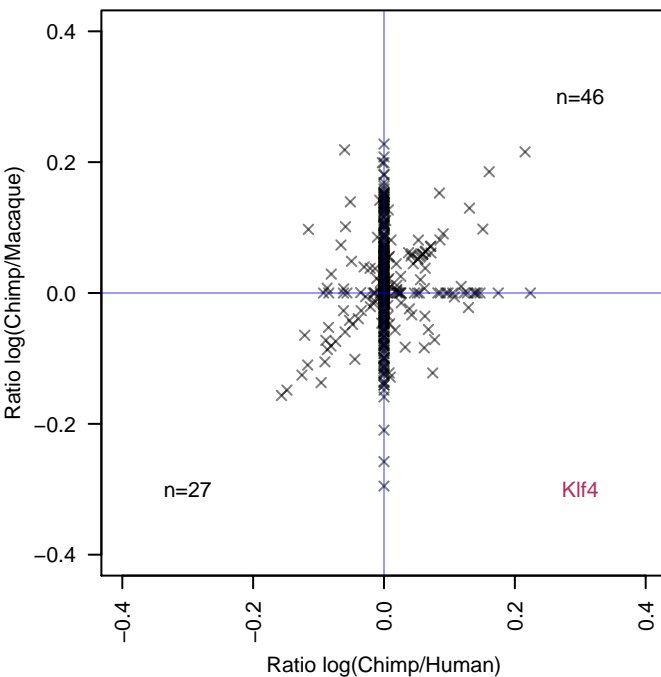

ChimpDownFibroblast.final.bed

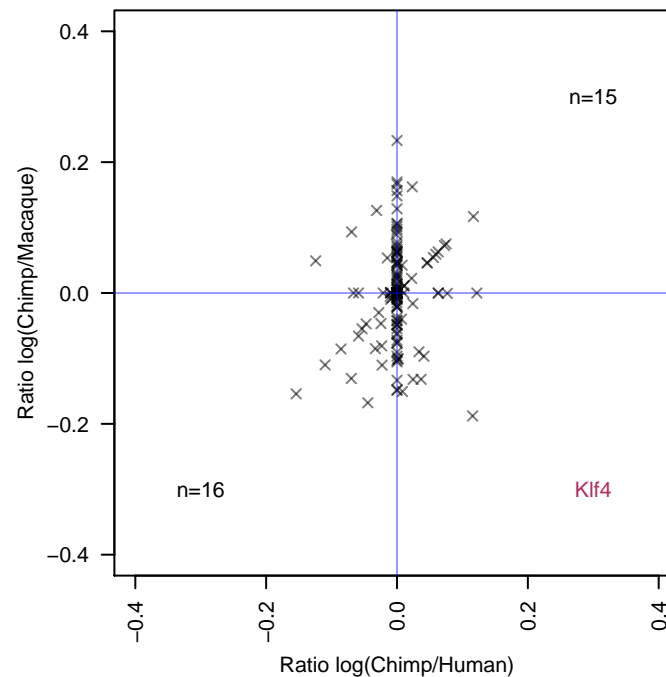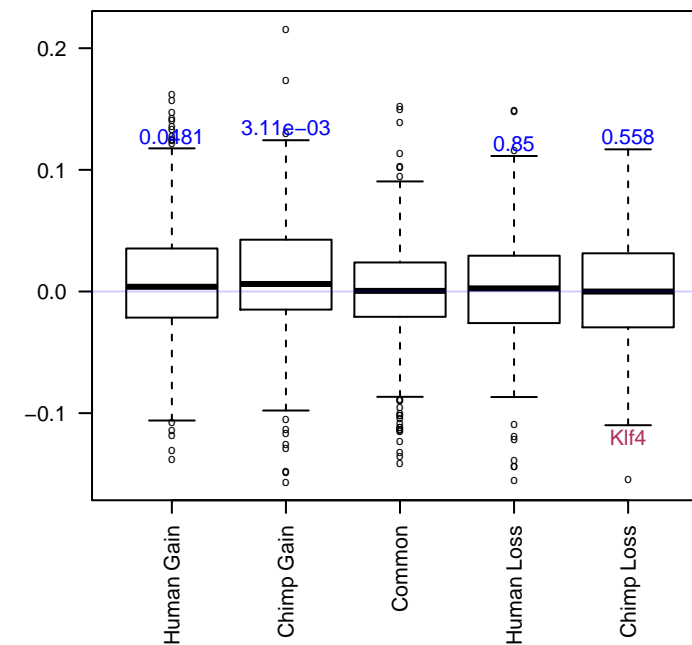

101 HumanUpFibroblast.final.bed

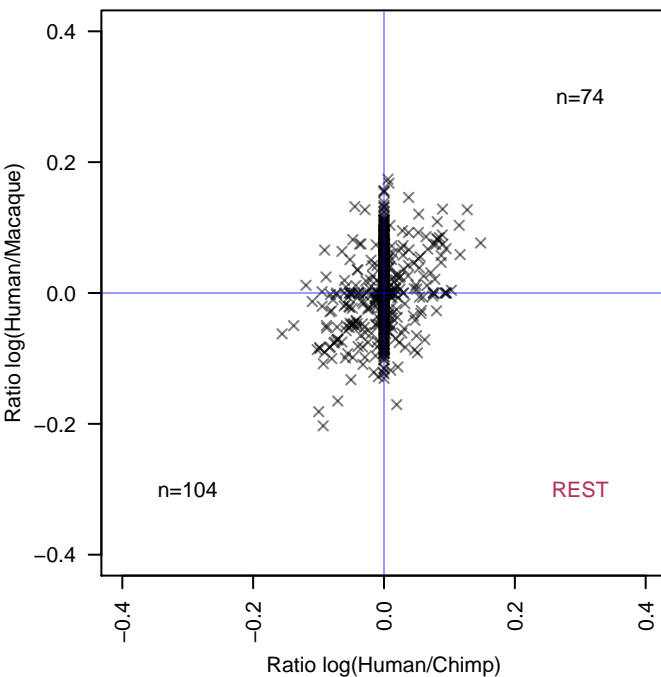

HumanDownFibroblast.final.bed

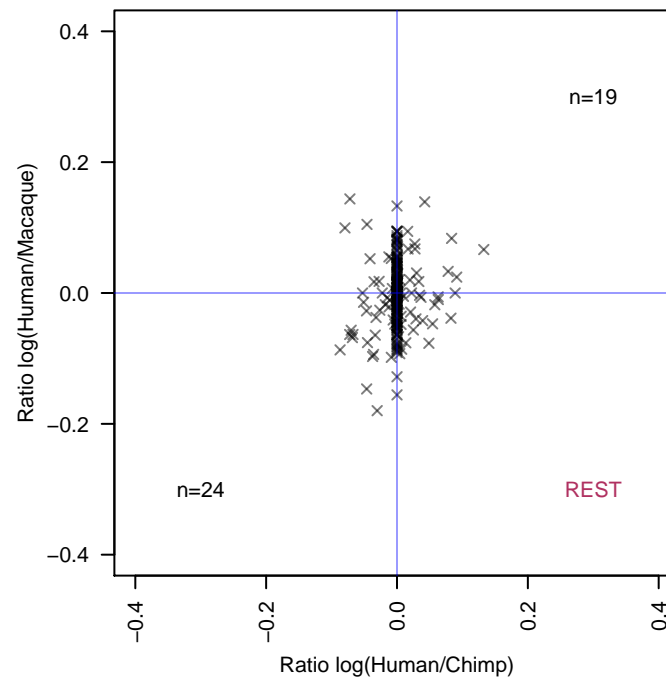

commonFibroblast.final.bed

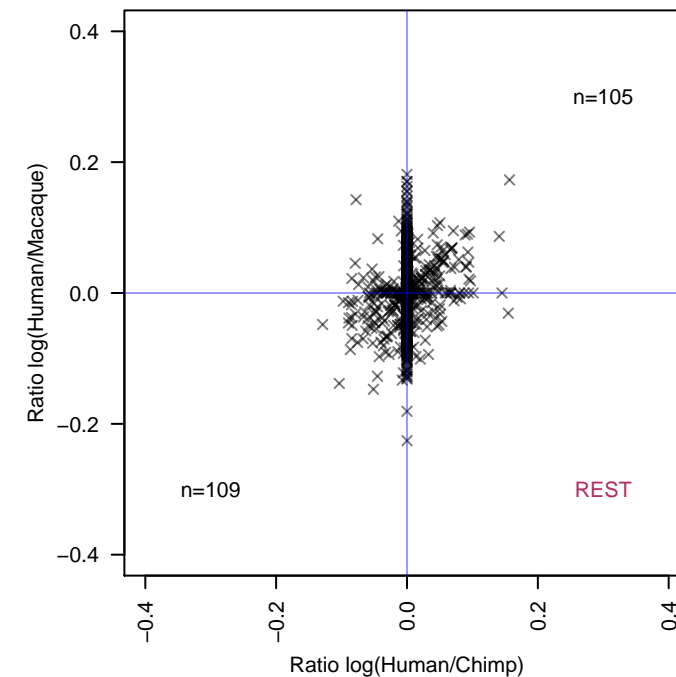

ChimpUpFibroblast.final.bed

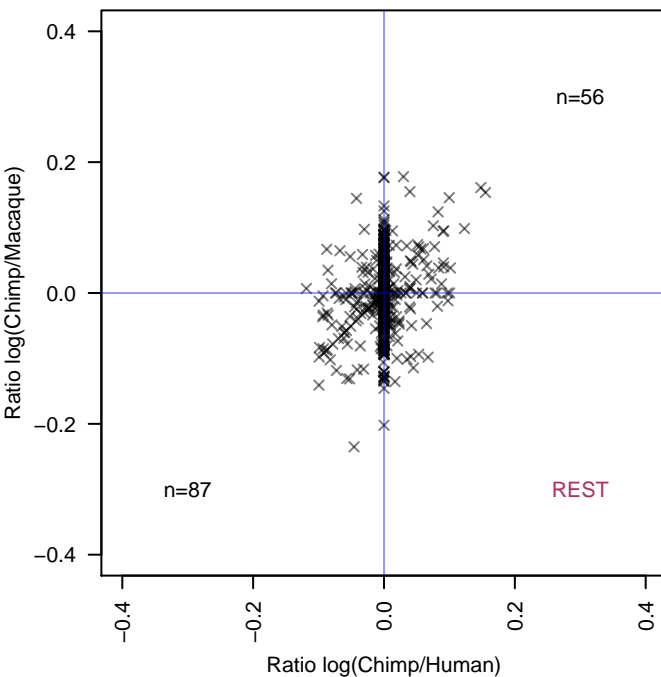

ChimpDownFibroblast.final.bed

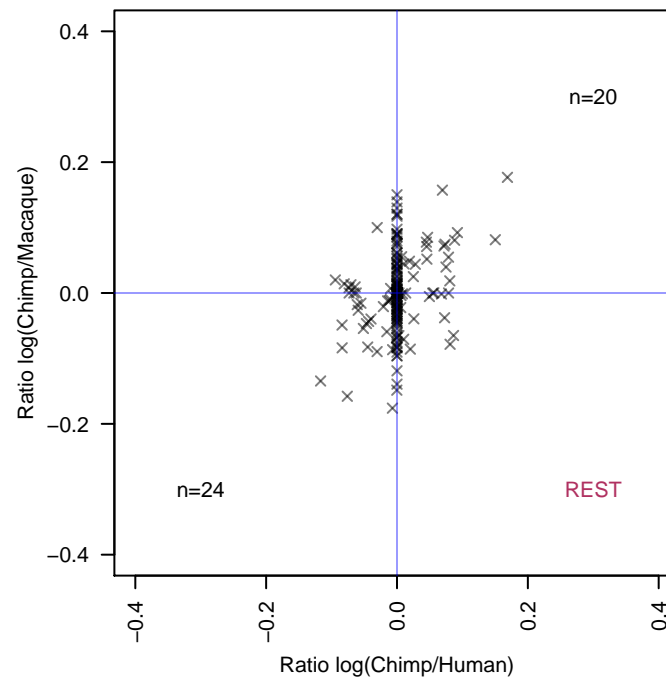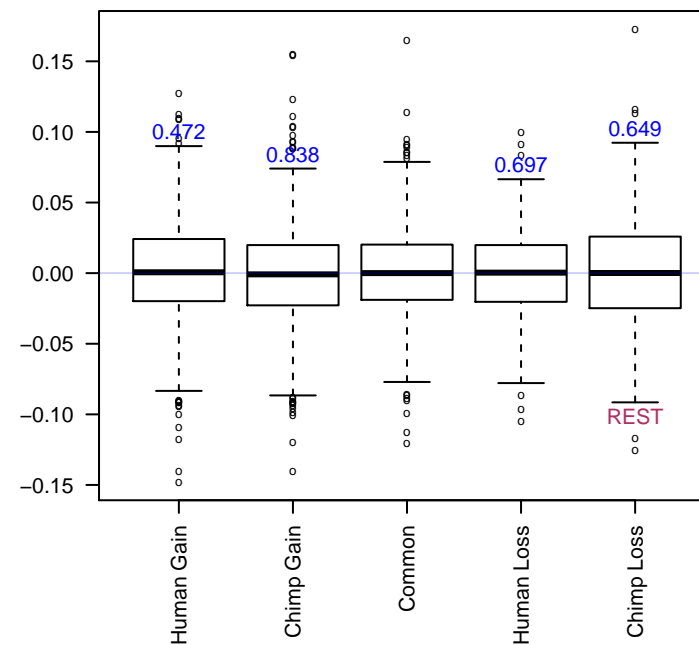

102 HumanUpFibroblast.final.bed

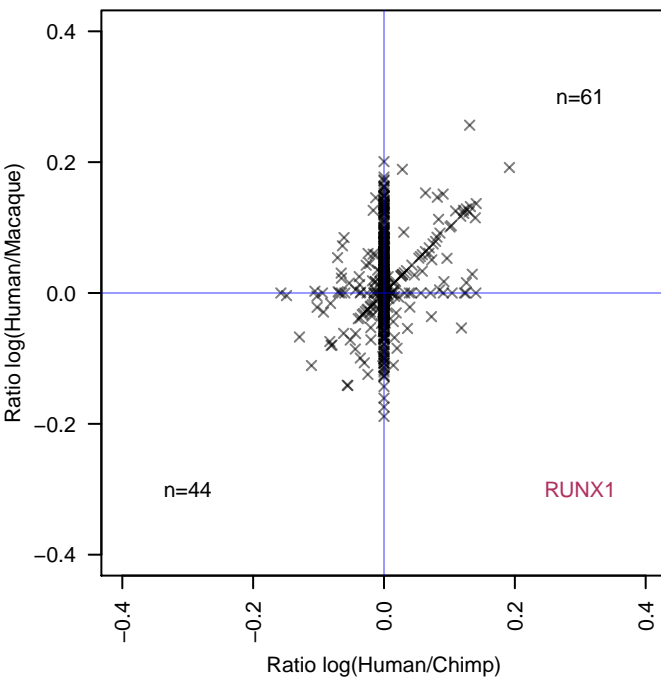

HumanDownFibroblast.final.bed

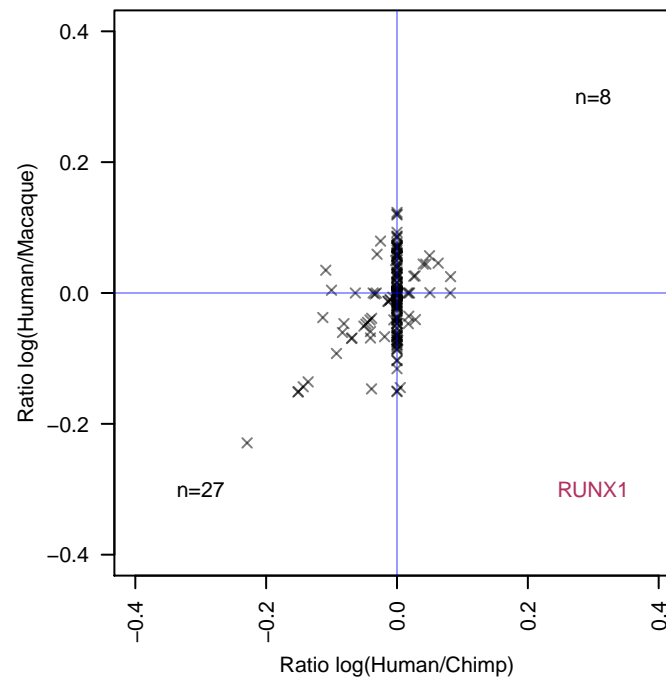

commonFibroblast.final.bed

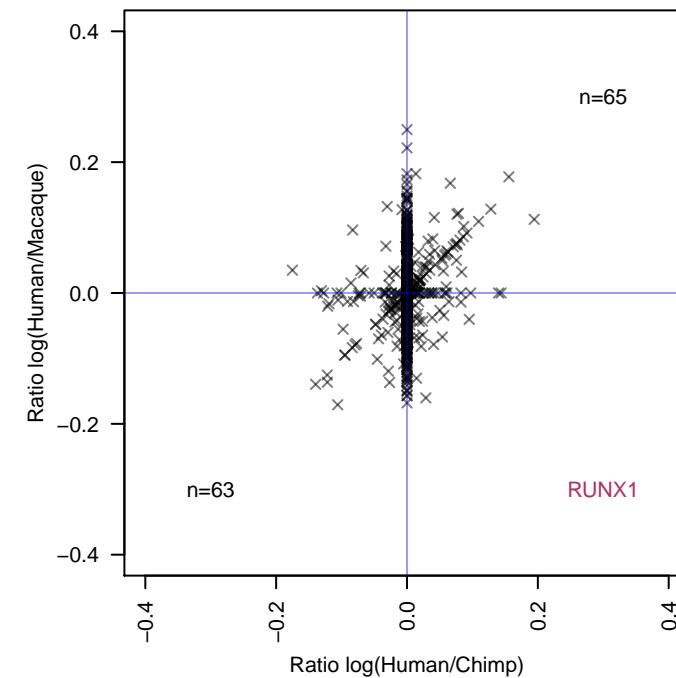

ChimpUpFibroblast.final.bed

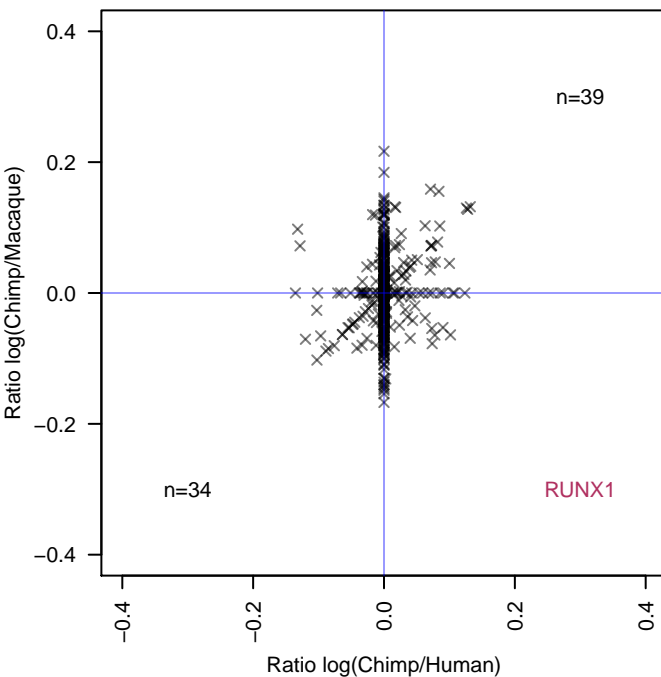

ChimpDownFibroblast.final.bed

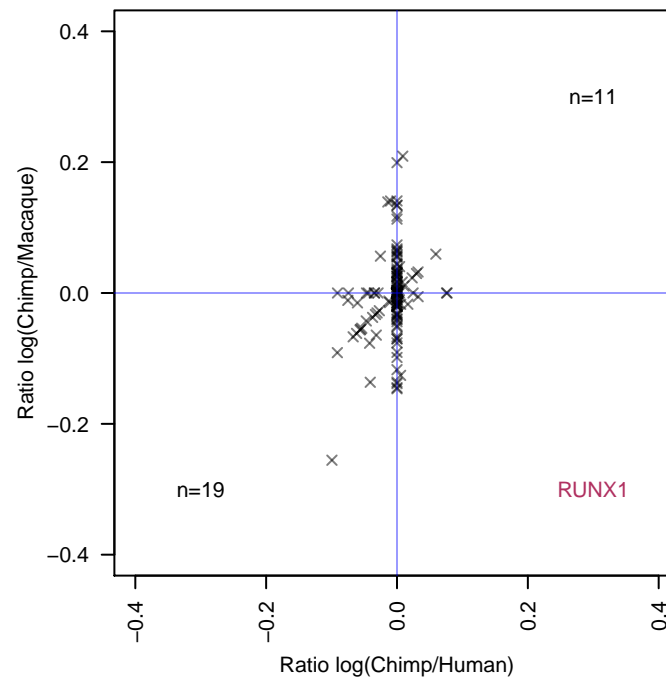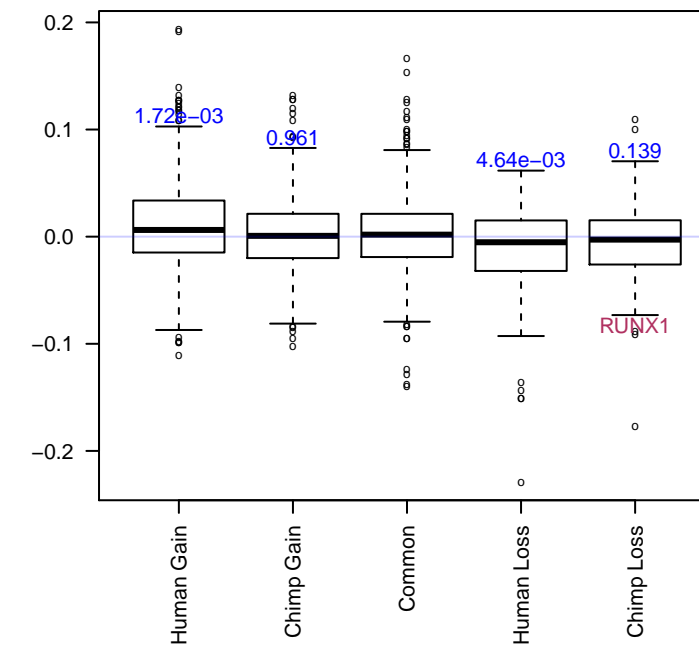

103 HumanUpFibroblast.final.bed

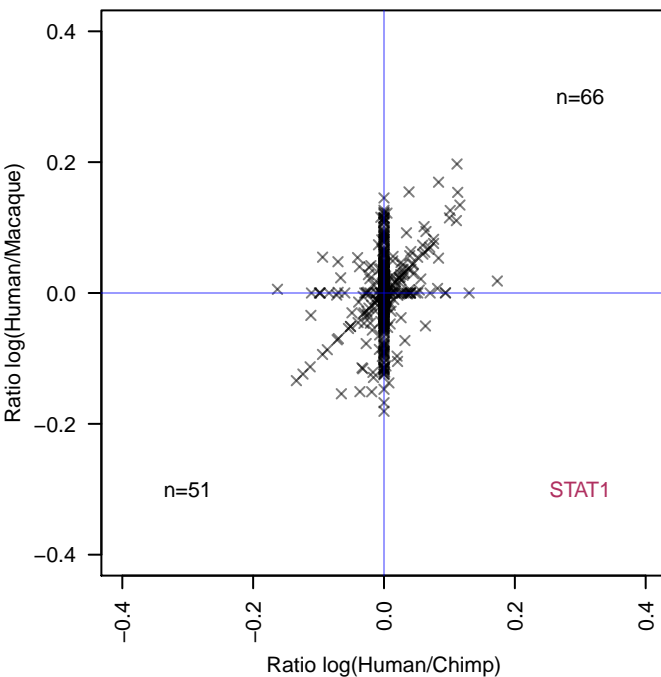

HumanDownFibroblast.final.bed

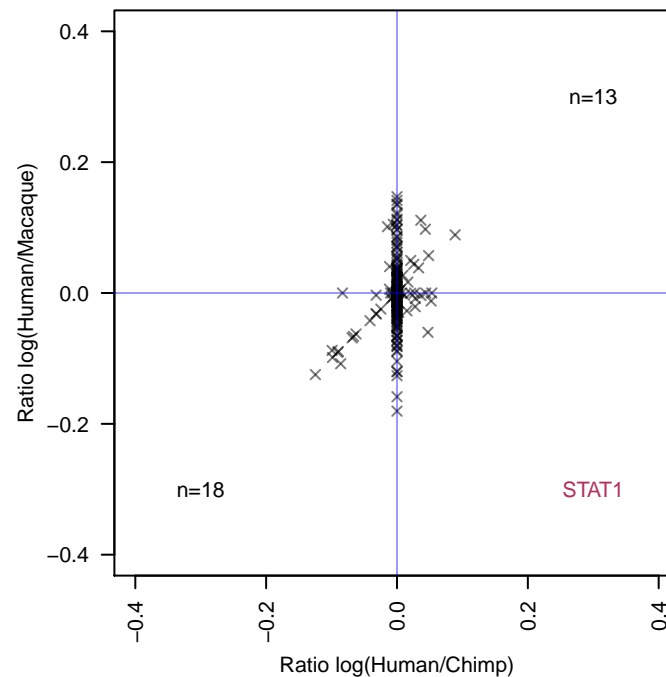

commonFibroblast.final.bed

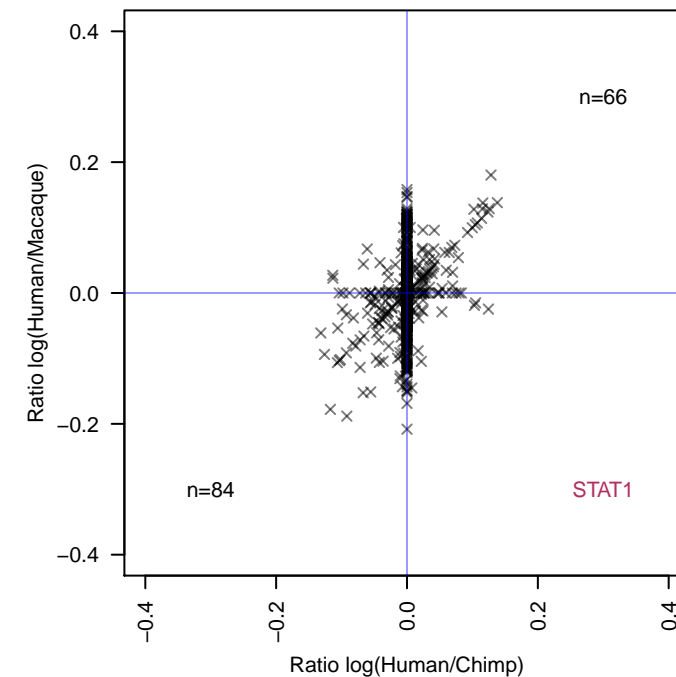

ChimpUpFibroblast.final.bed

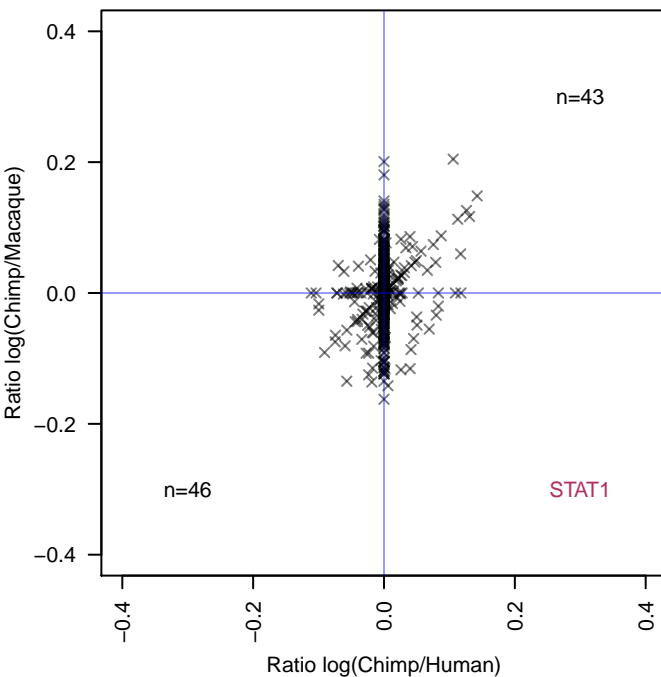

ChimpDownFibroblast.final.bed

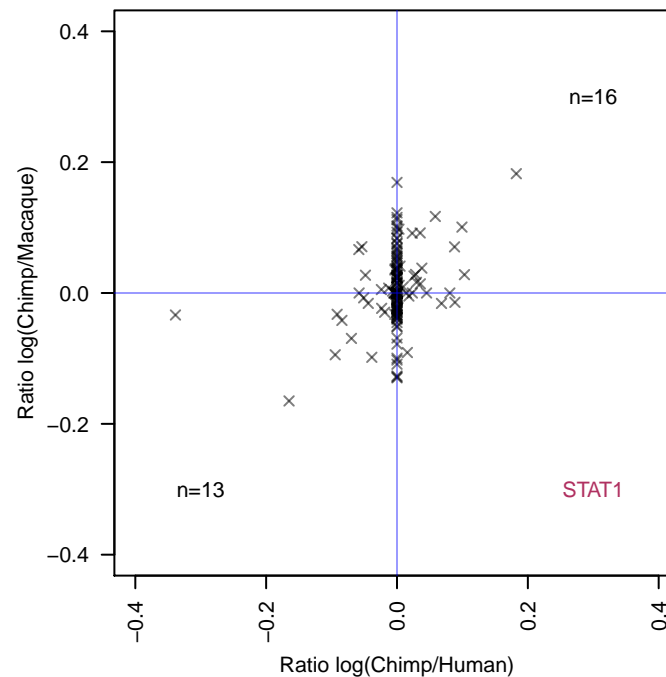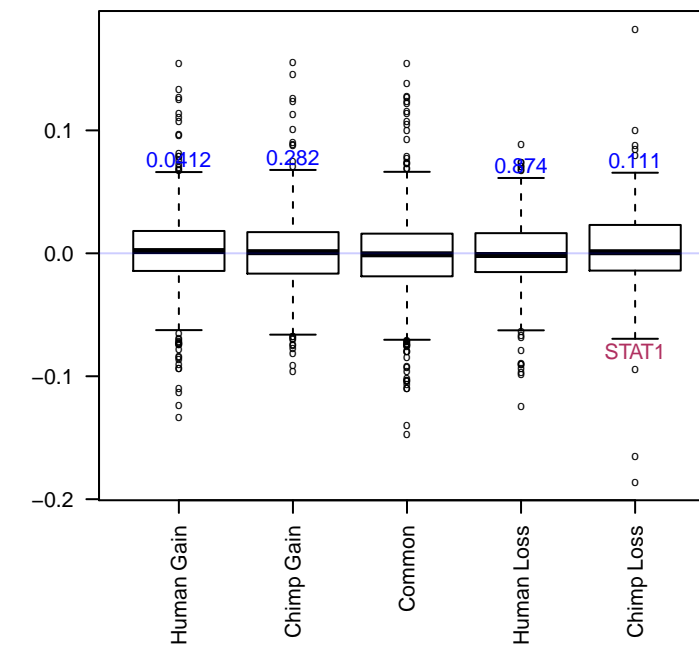

104 HumanUpFibroblast.final.bed

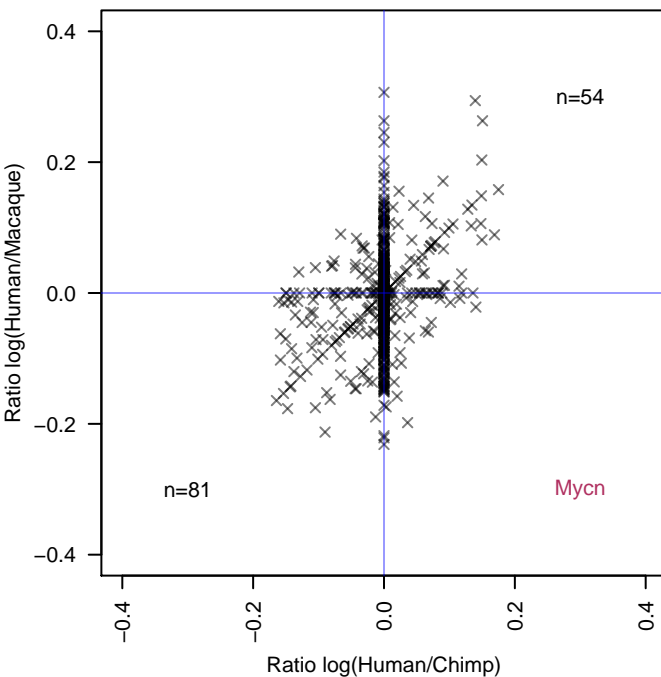

HumanDownFibroblast.final.bed

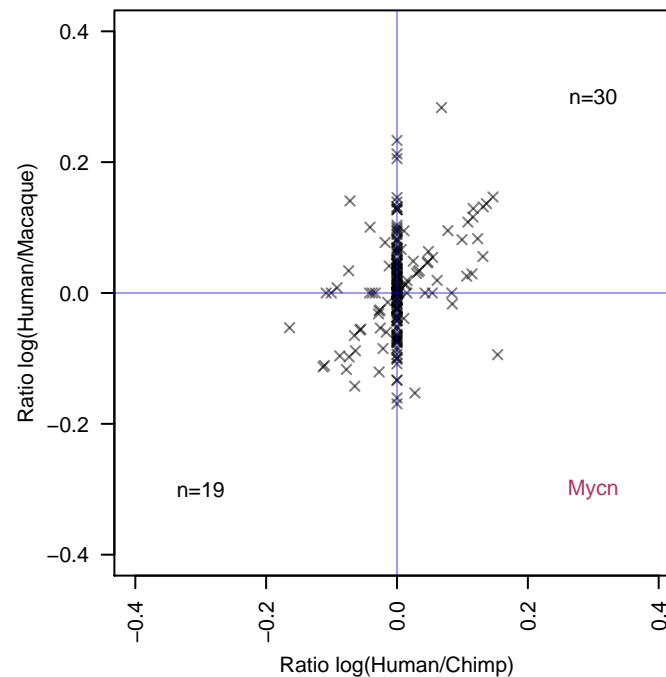

commonFibroblast.final.bed

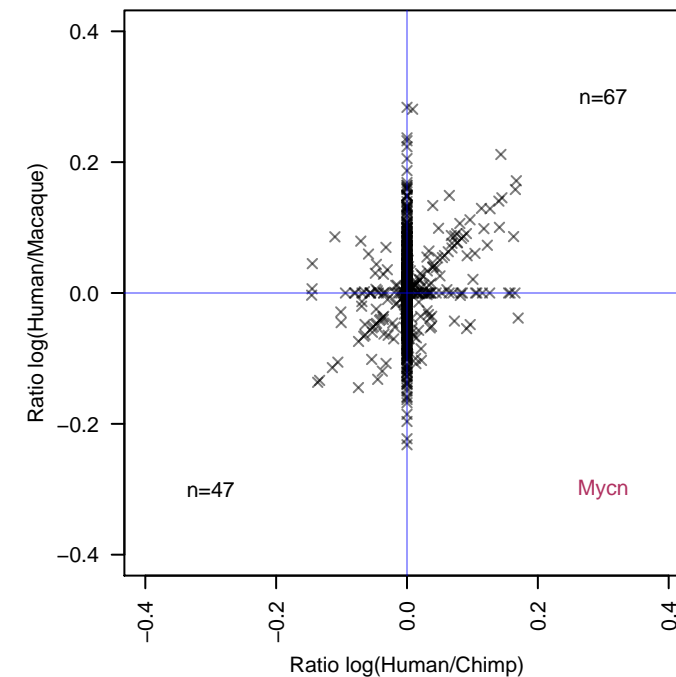

ChimpUpFibroblast.final.bed

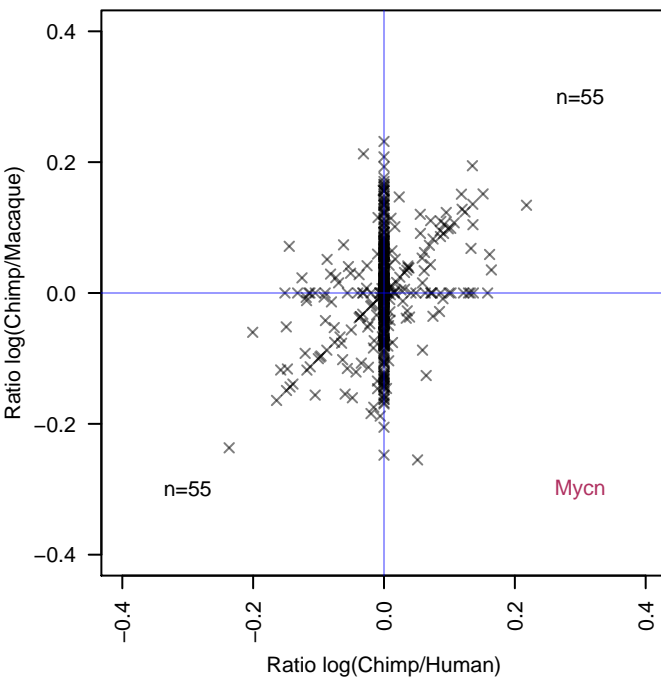

ChimpDownFibroblast.final.bed

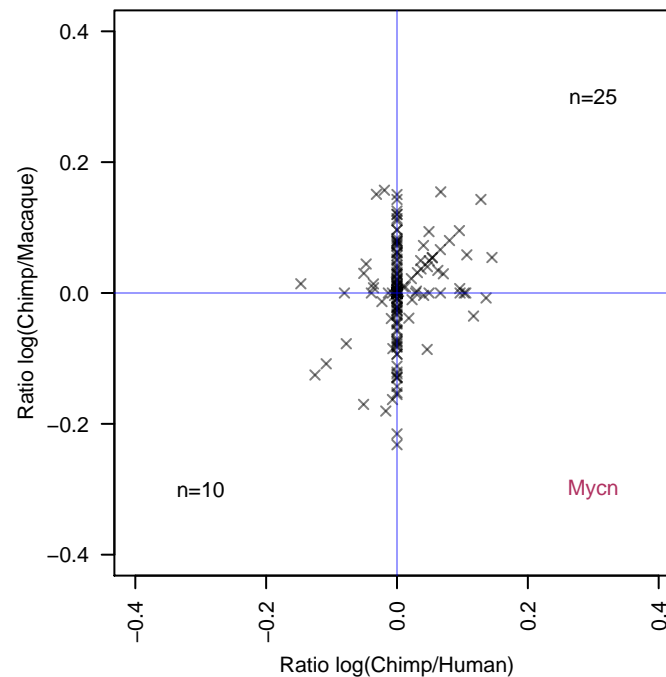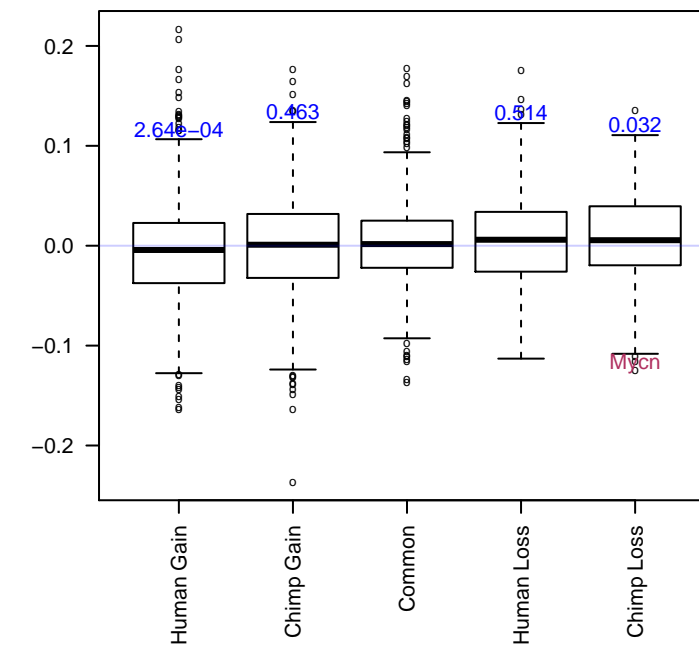

105 HumanUpFibroblast.final.bed

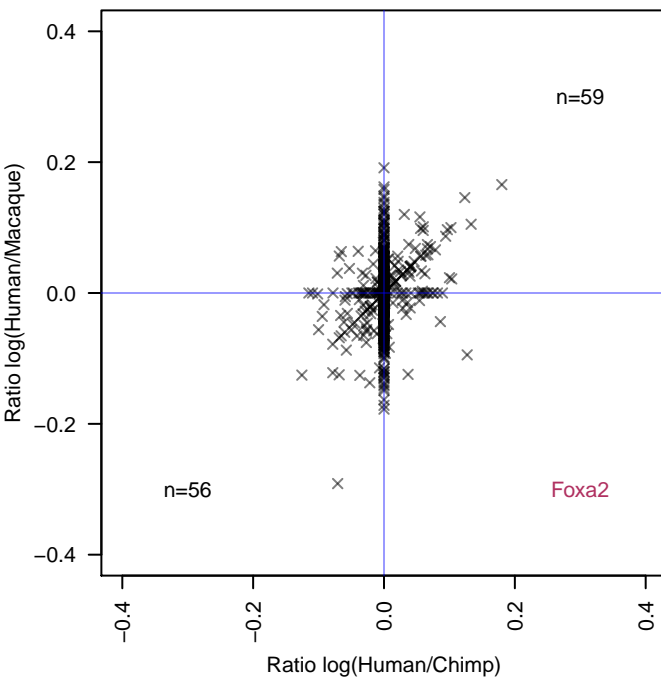

HumanDownFibroblast.final.bed

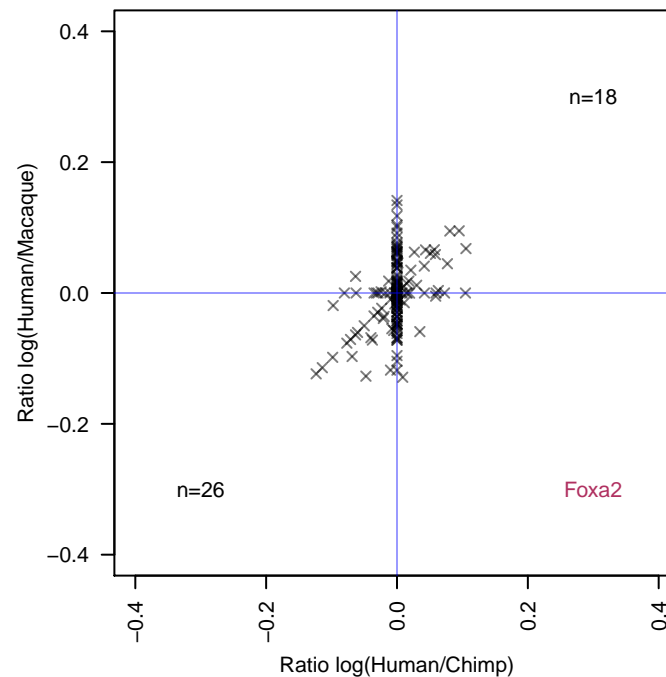

commonFibroblast.final.bed

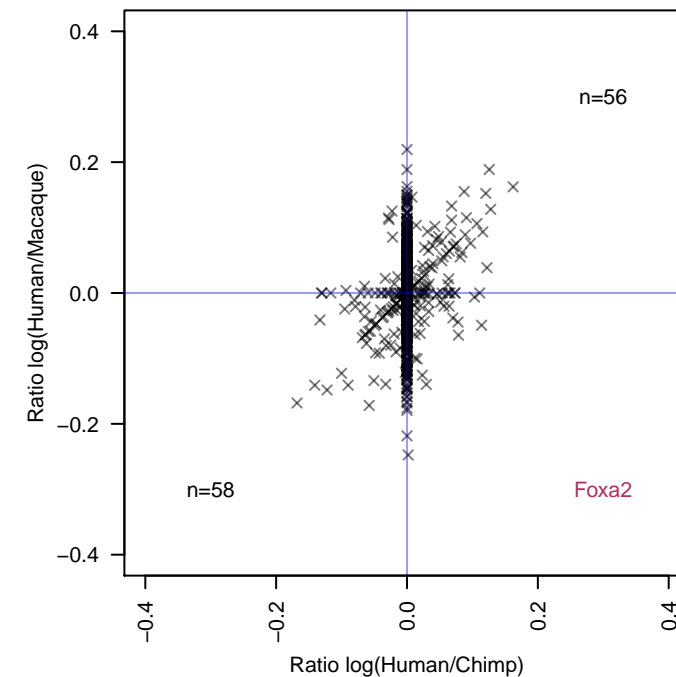

ChimpUpFibroblast.final.bed

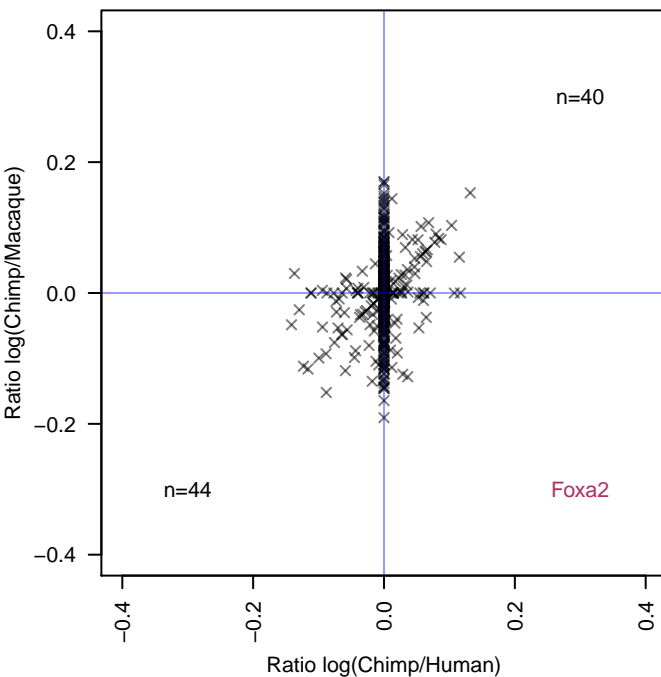

ChimpDownFibroblast.final.bed

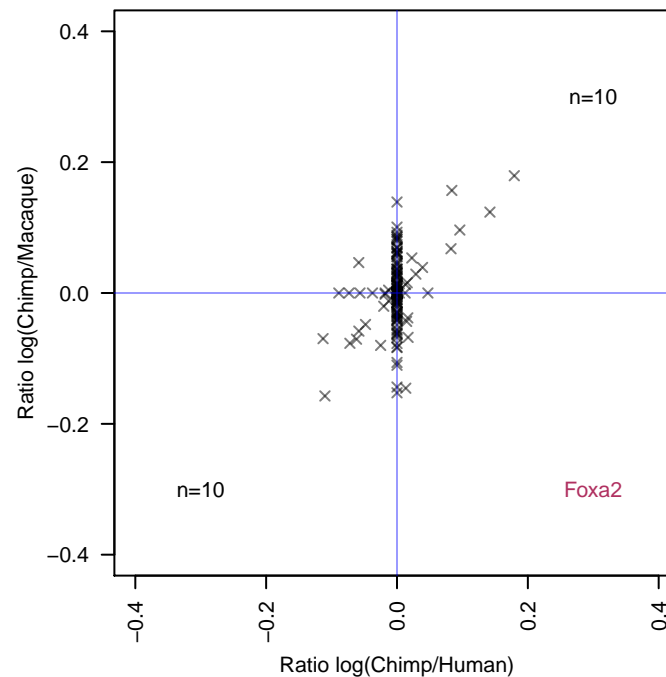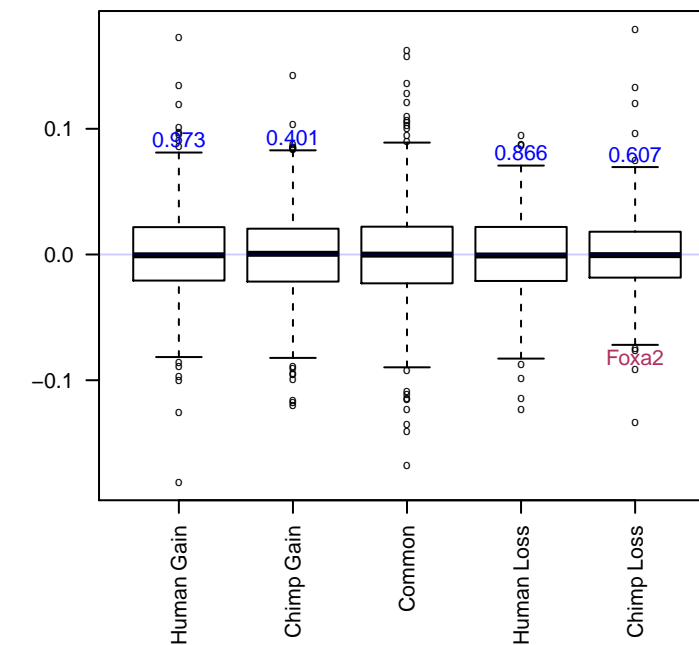

106 HumanUpFibroblast.final.bed

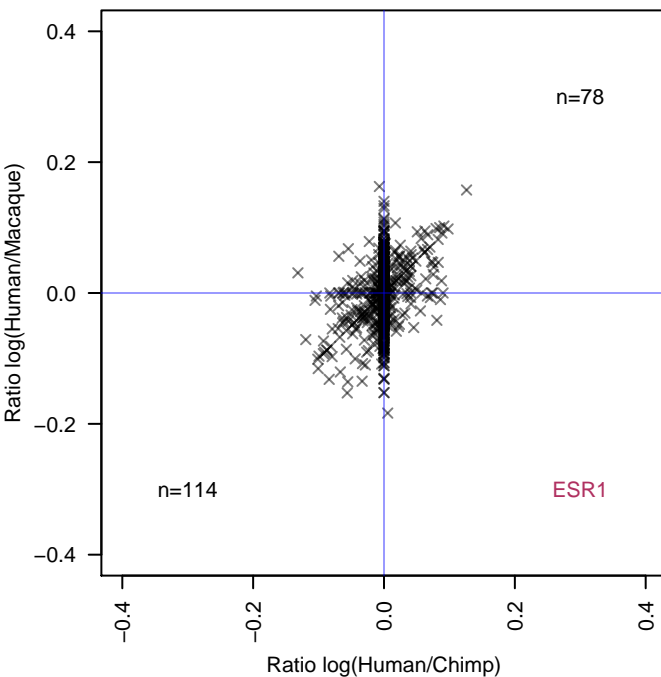

HumanDownFibroblast.final.bed

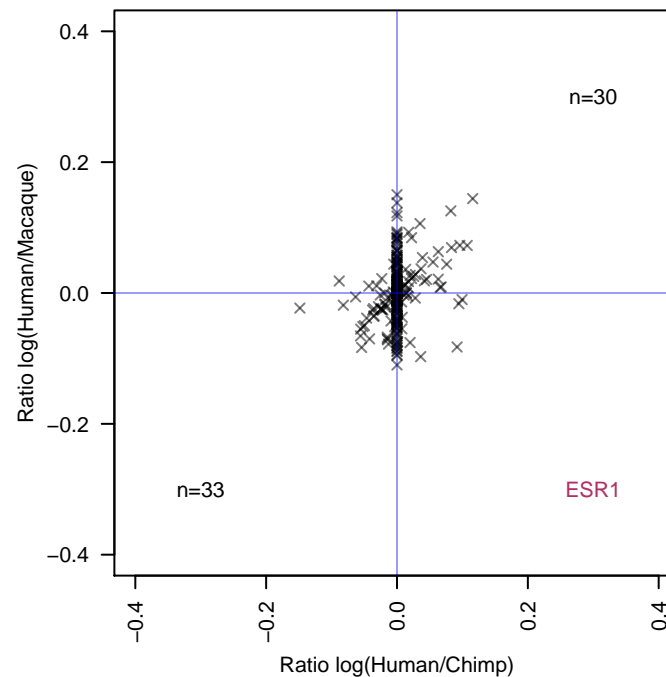

commonFibroblast.final.bed

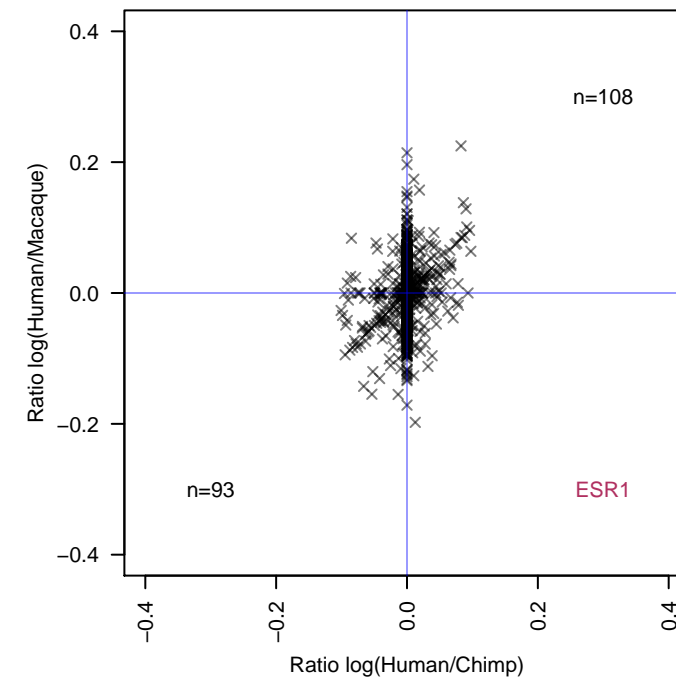

ChimpUpFibroblast.final.bed

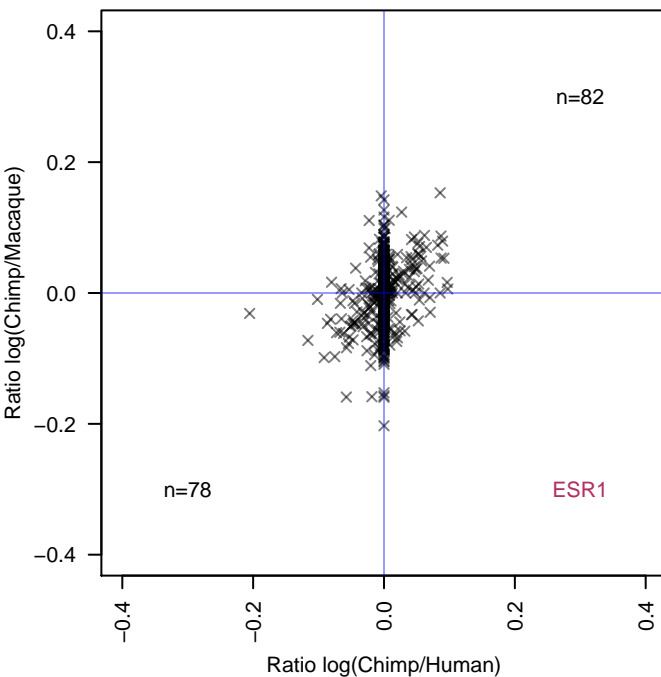

ChimpDownFibroblast.final.bed

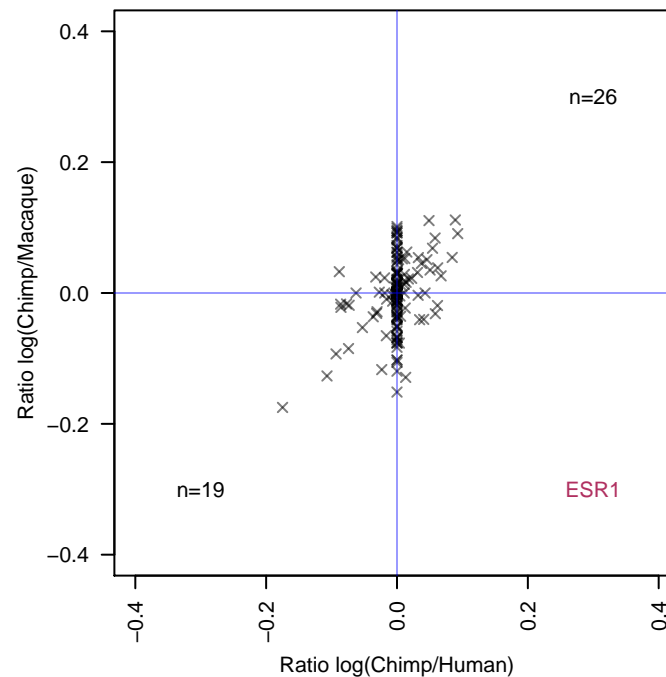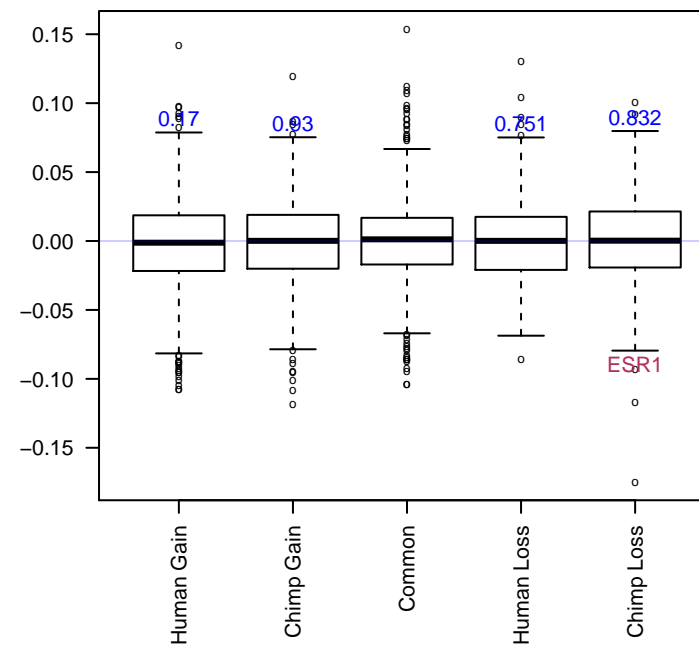

107 HumanUpFibroblast.final.bed

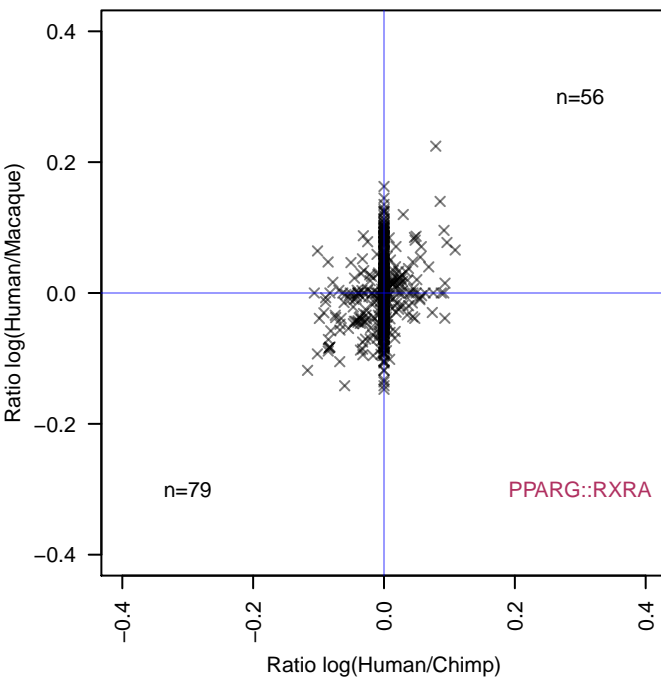

HumanDownFibroblast.final.bed

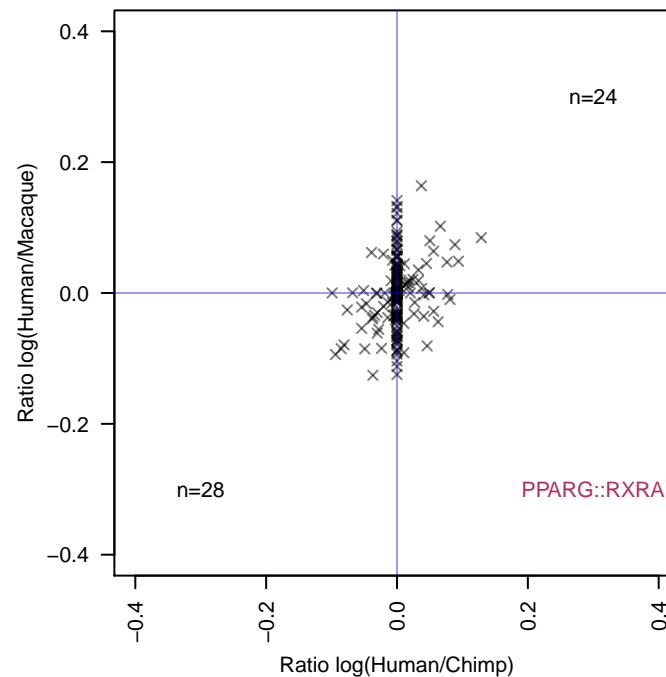

commonFibroblast.final.bed

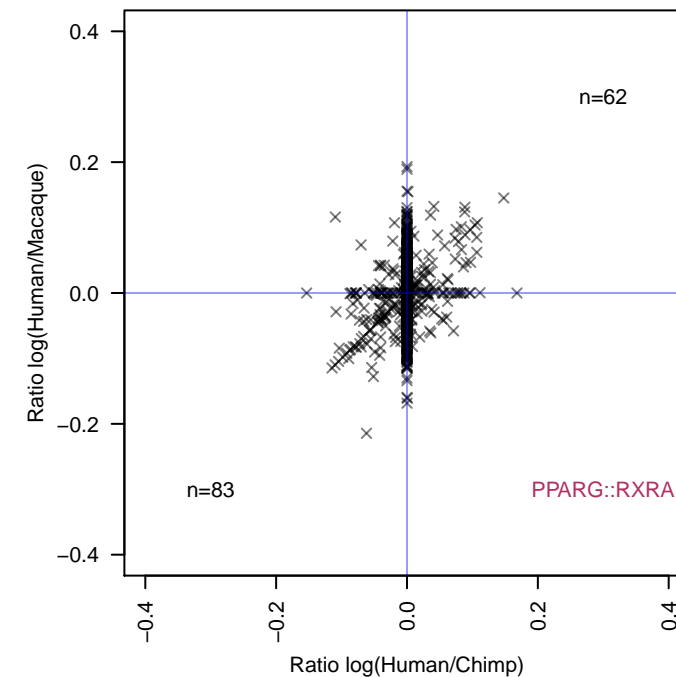

ChimpUpFibroblast.final.bed

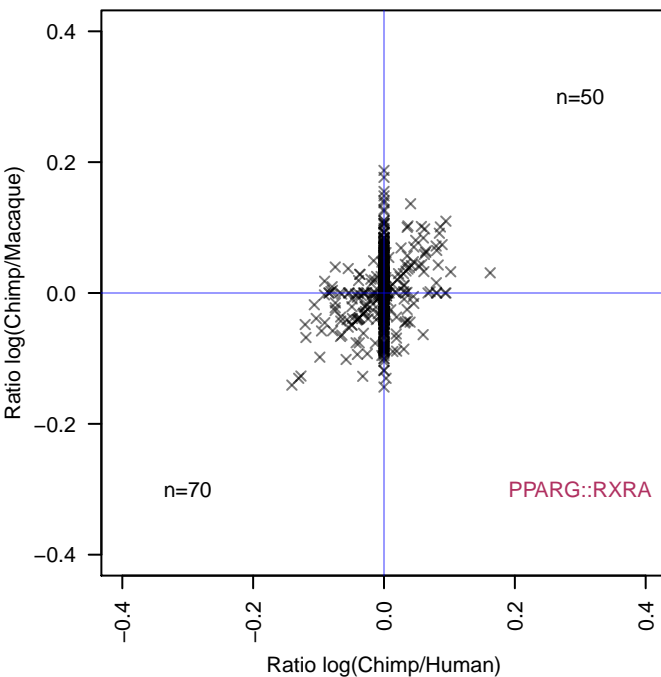

ChimpDownFibroblast.final.bed

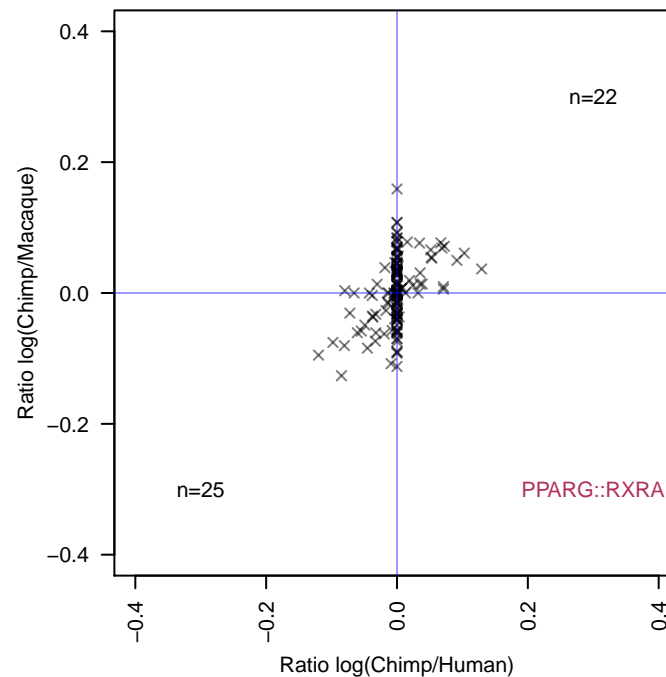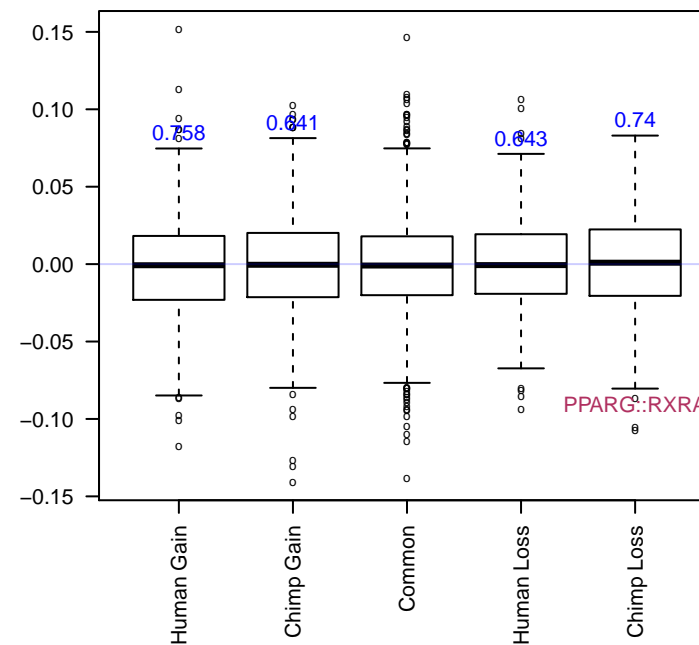

108 HumanUpFibroblast.final.bed

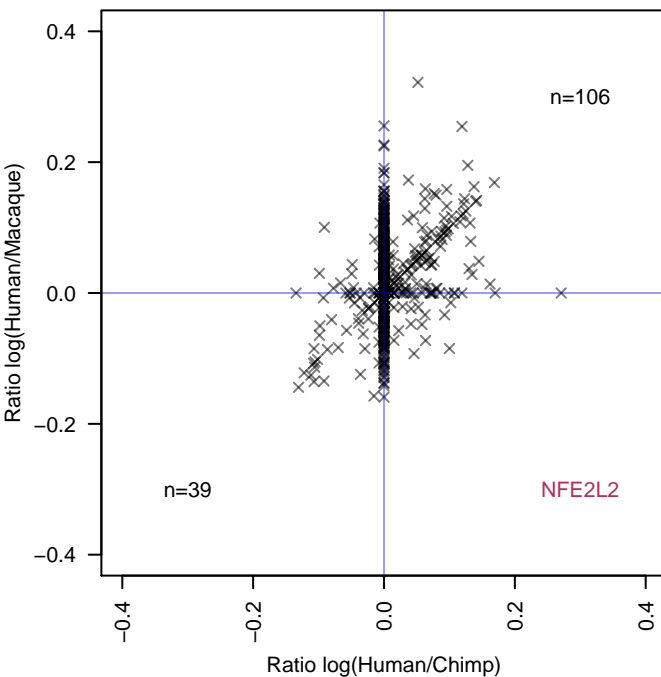

HumanDownFibroblast.final.bed

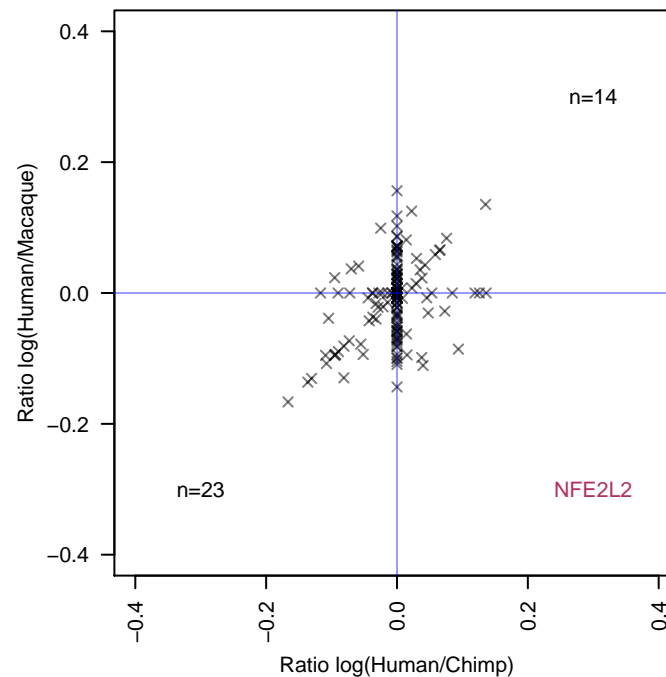

commonFibroblast.final.bed

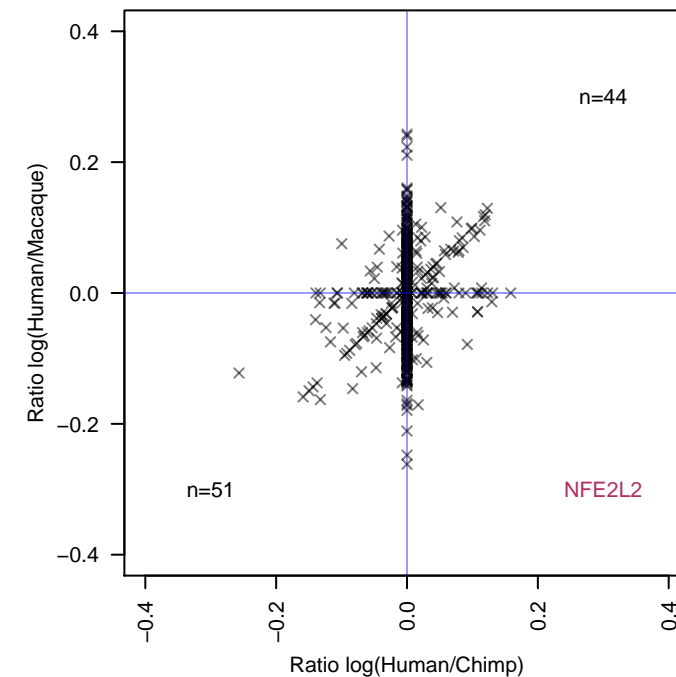

ChimpUpFibroblast.final.bed

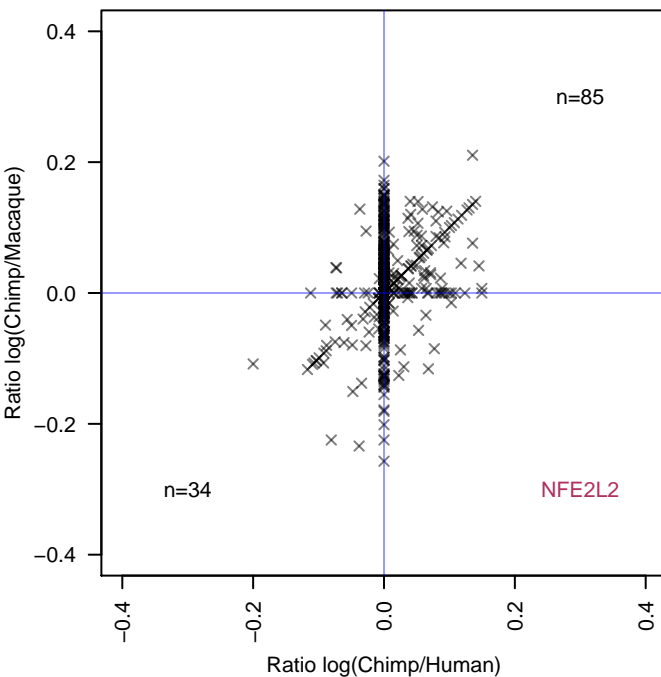

ChimpDownFibroblast.final.bed

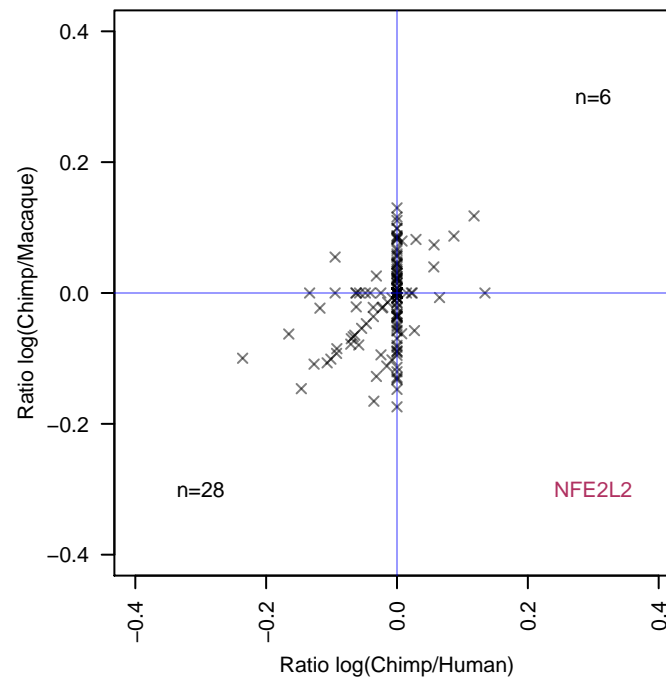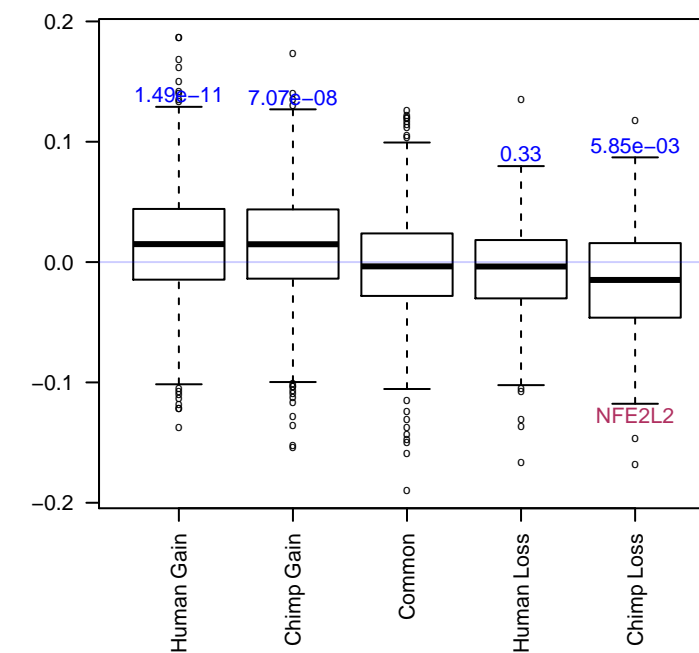

109 HumanUpFibroblast.final.bed

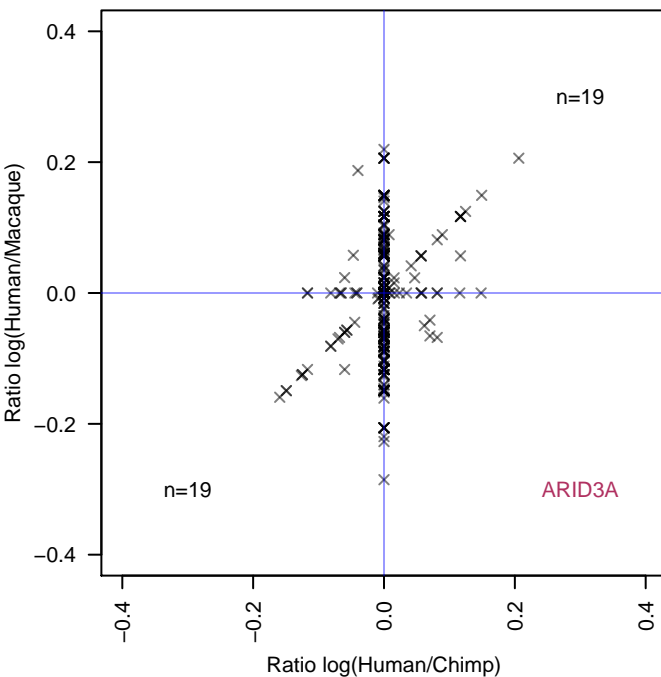

HumanDownFibroblast.final.bed

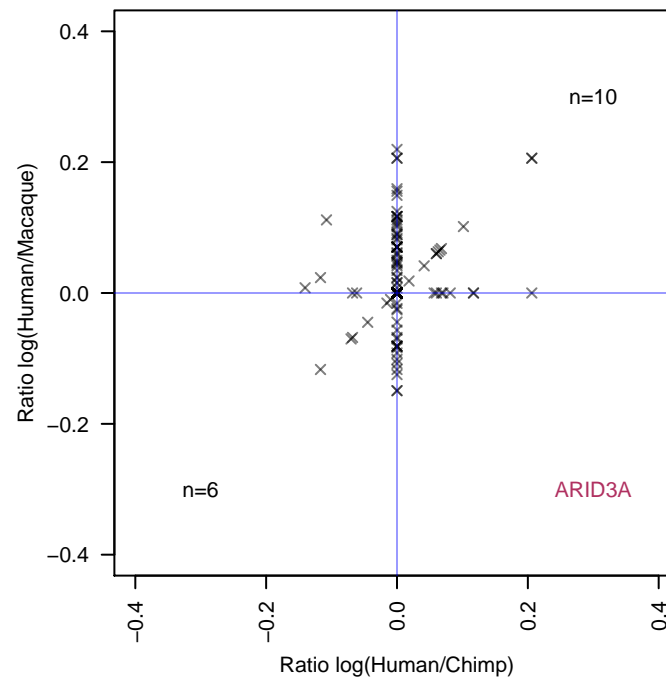

commonFibroblast.final.bed

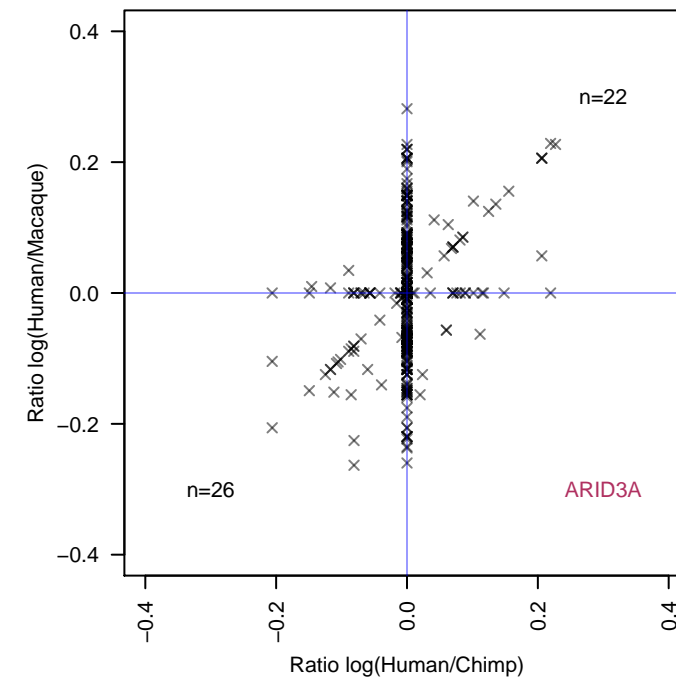

ChimpUpFibroblast.final.bed

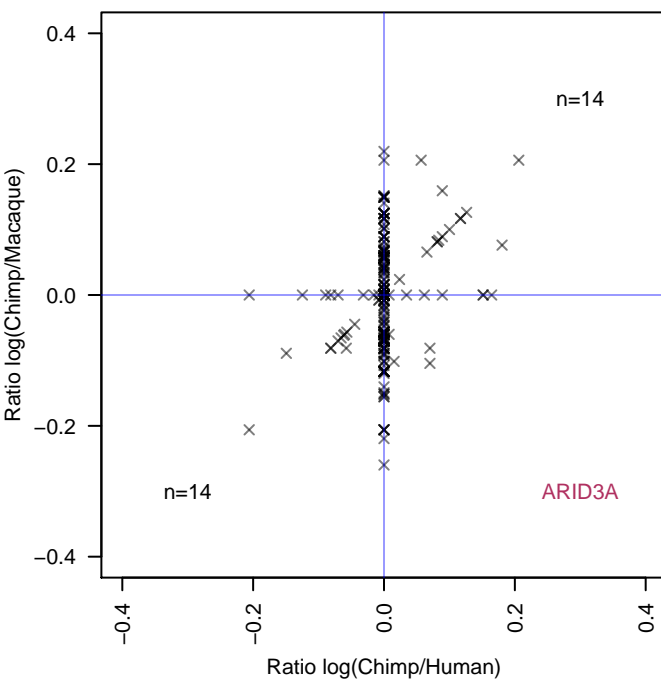

ChimpDownFibroblast.final.bed

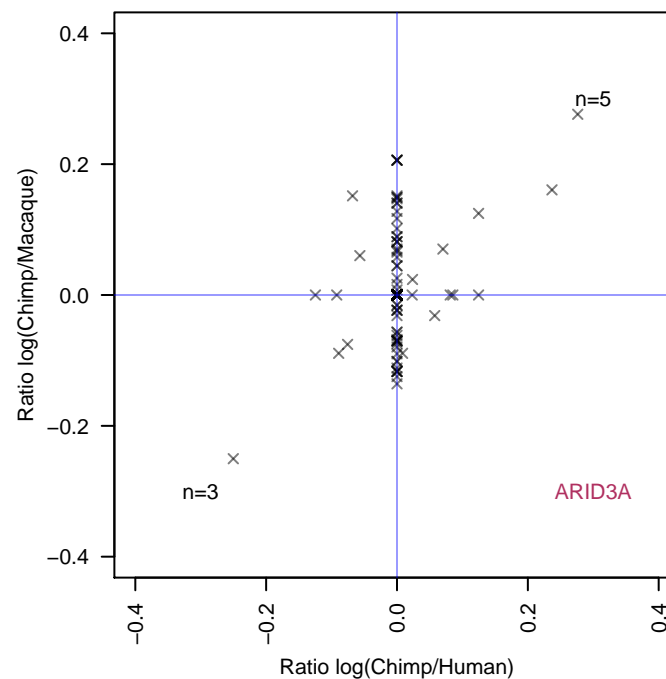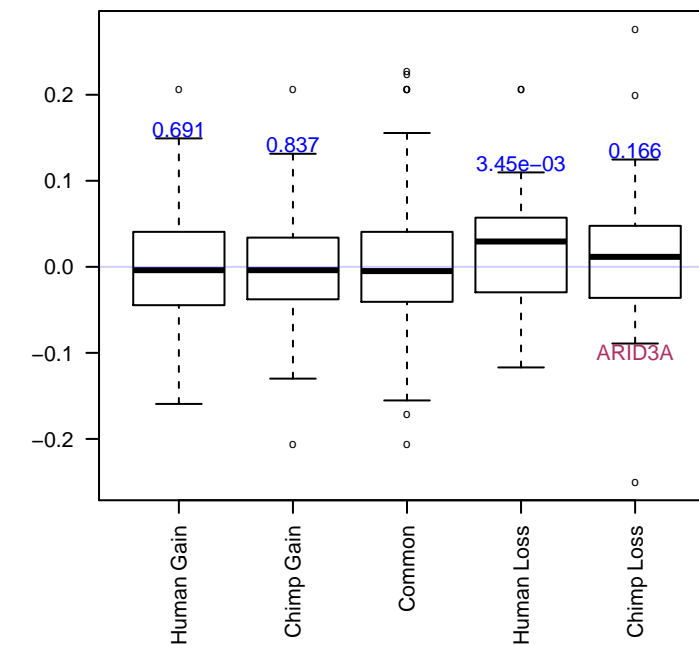

110 HumanUpFibroblast.final.bed

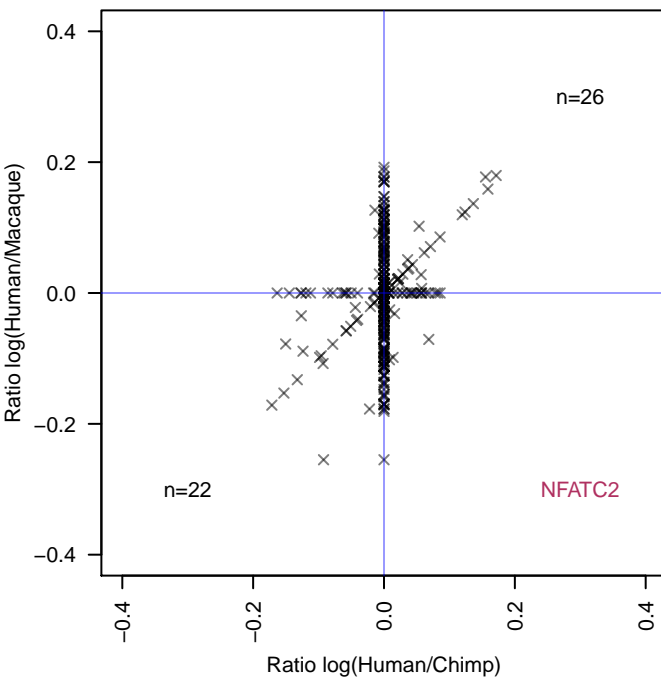

HumanDownFibroblast.final.bed

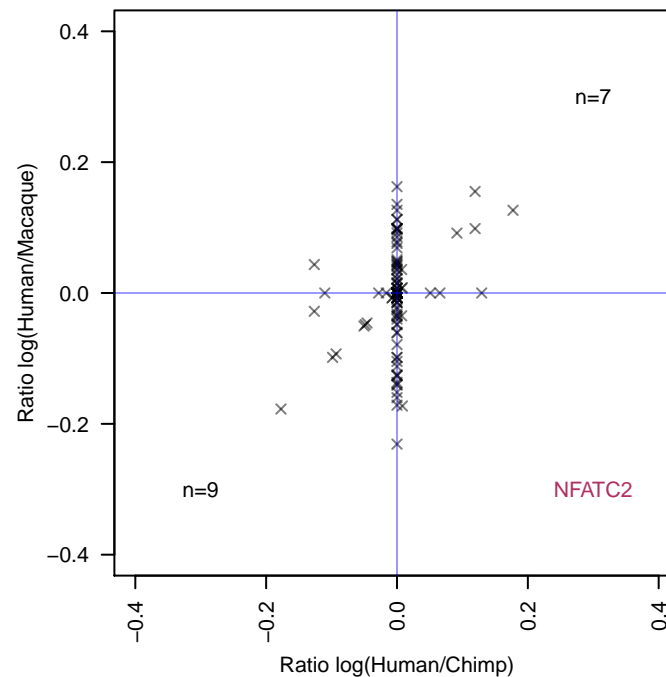

commonFibroblast.final.bed

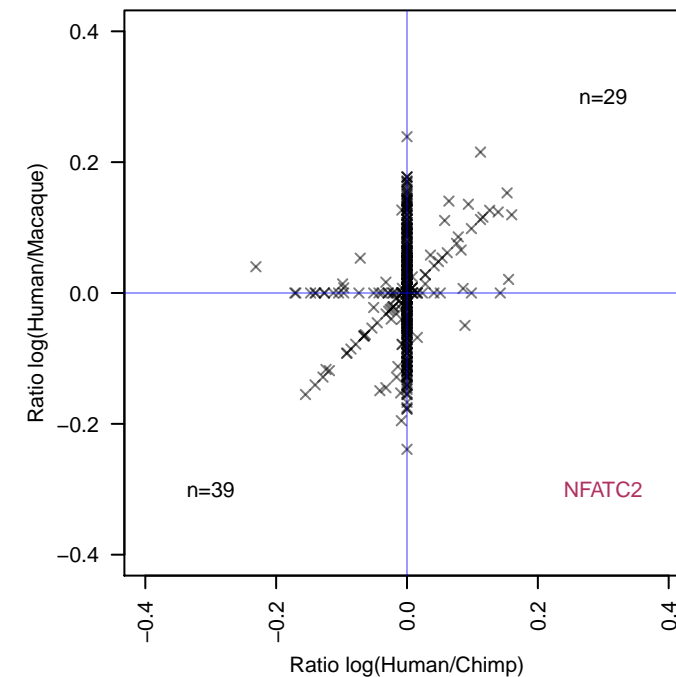

ChimpUpFibroblast.final.bed

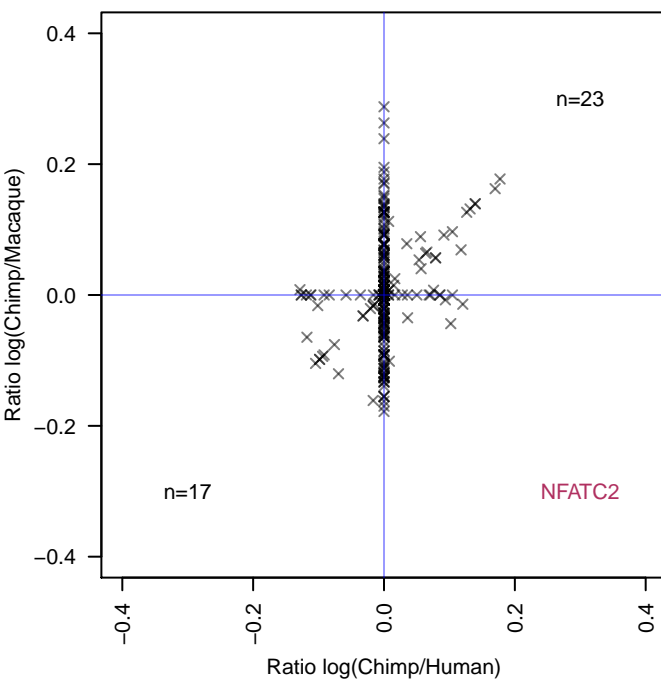

ChimpDownFibroblast.final.bed

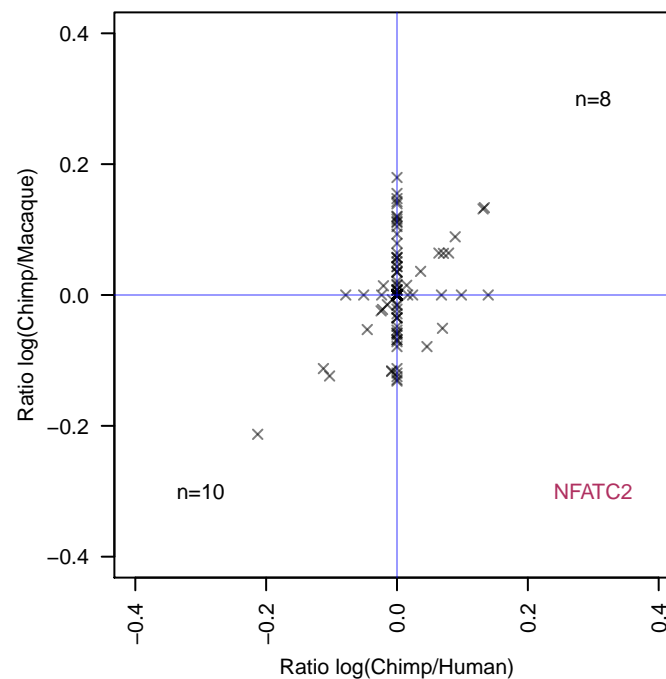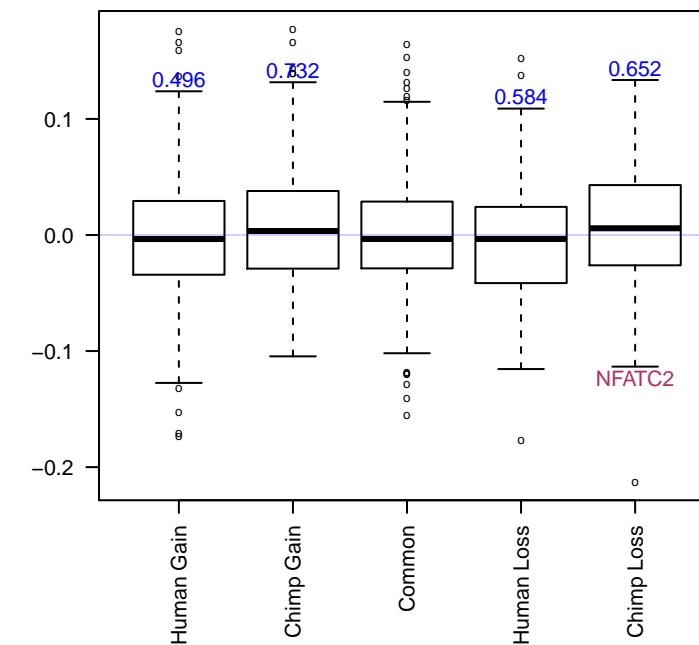

111 HumanUpFibroblast.final.bed

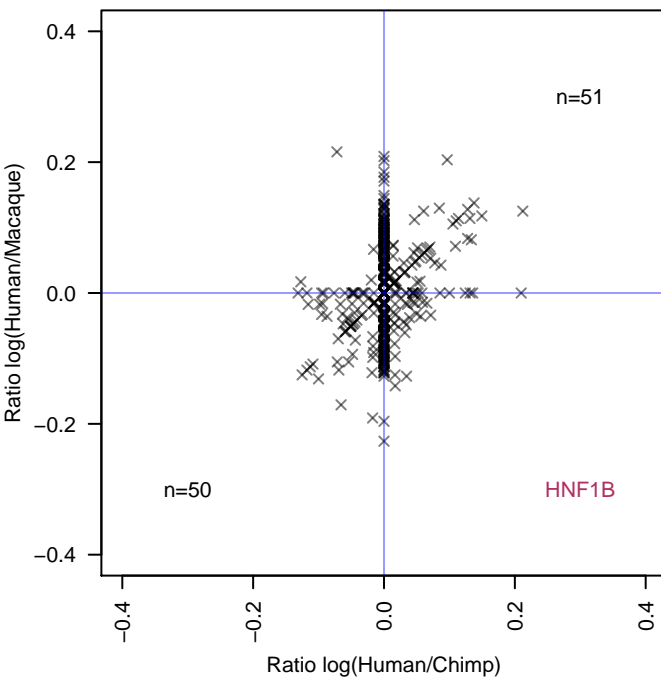

HumanDownFibroblast.final.bed

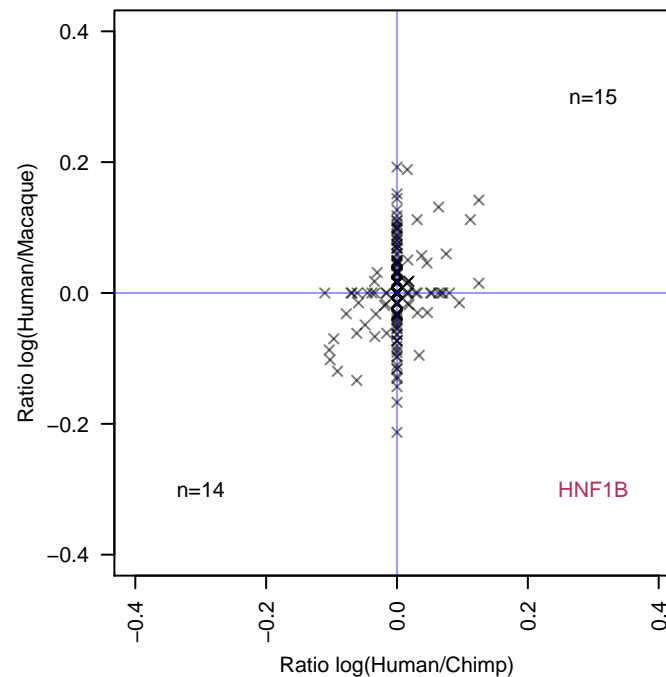

commonFibroblast.final.bed

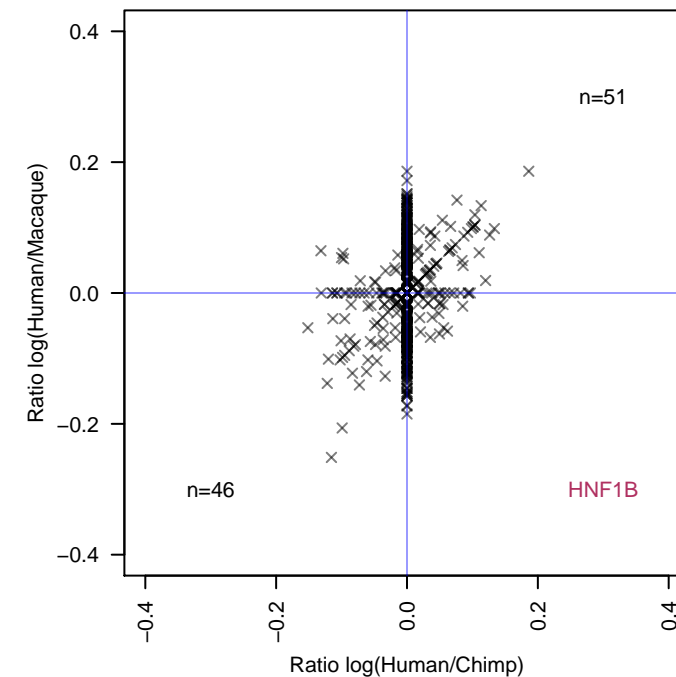

ChimpUpFibroblast.final.bed

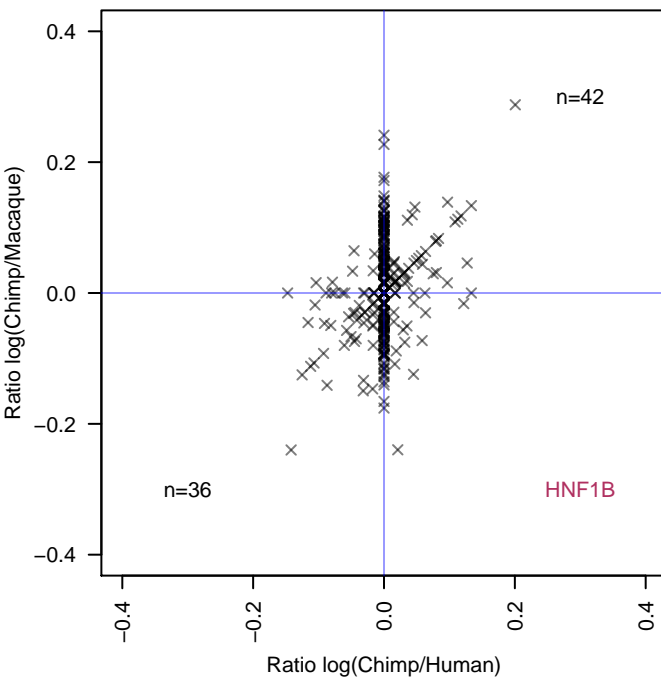

ChimpDownFibroblast.final.bed

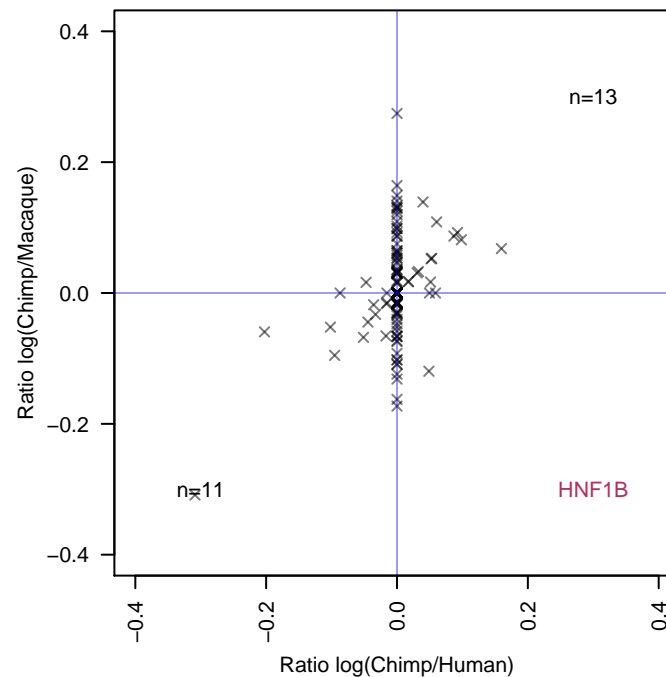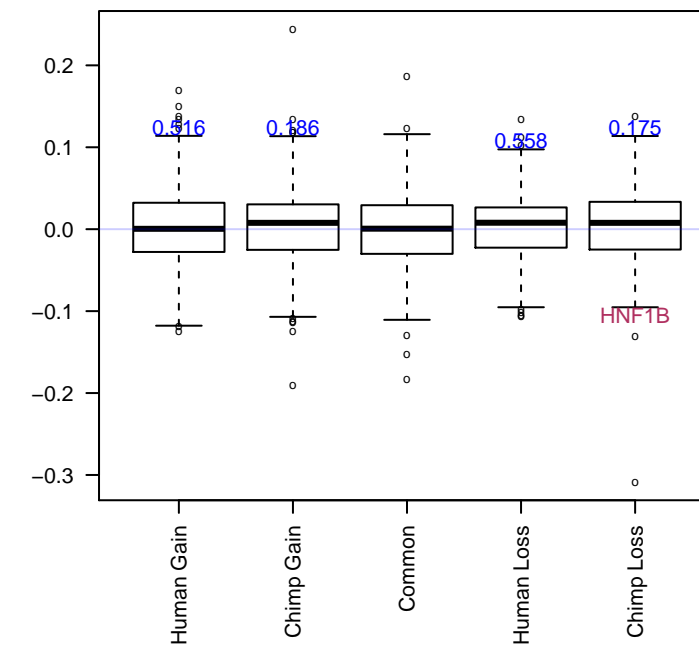

112 HumanUpFibroblast.final.bed

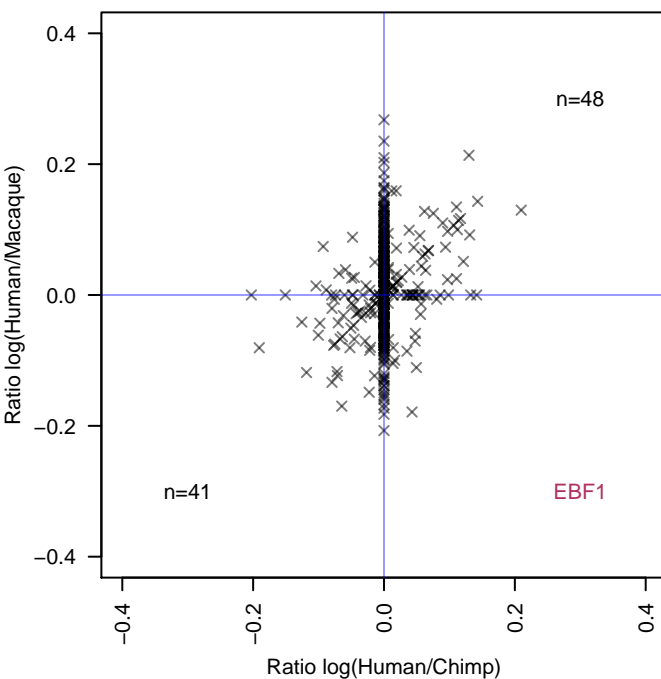

HumanDownFibroblast.final.bed

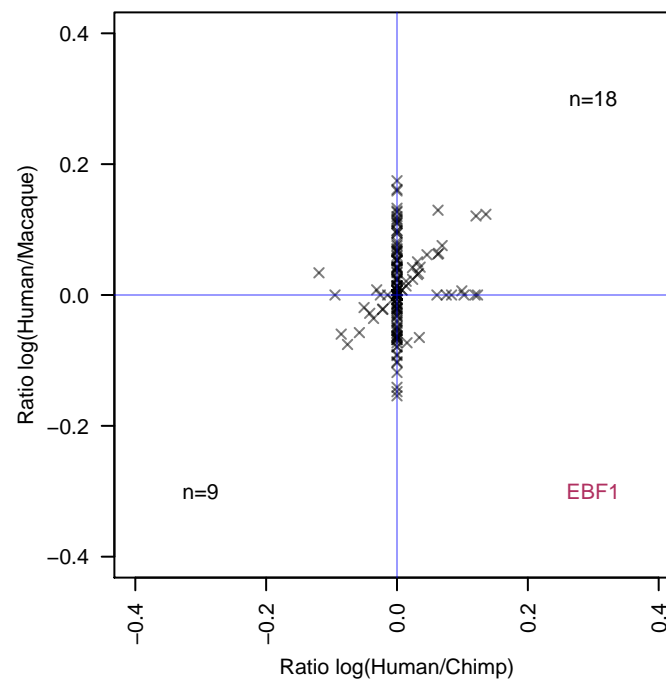

commonFibroblast.final.bed

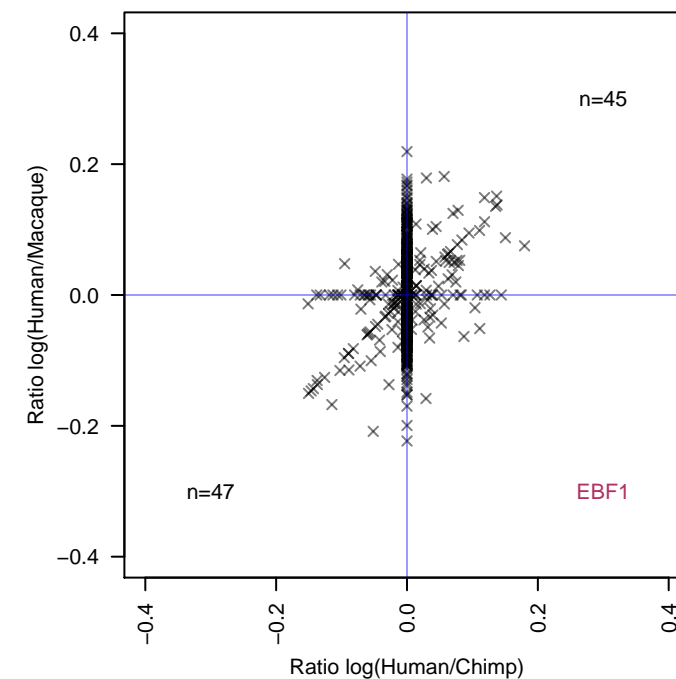

ChimpUpFibroblast.final.bed

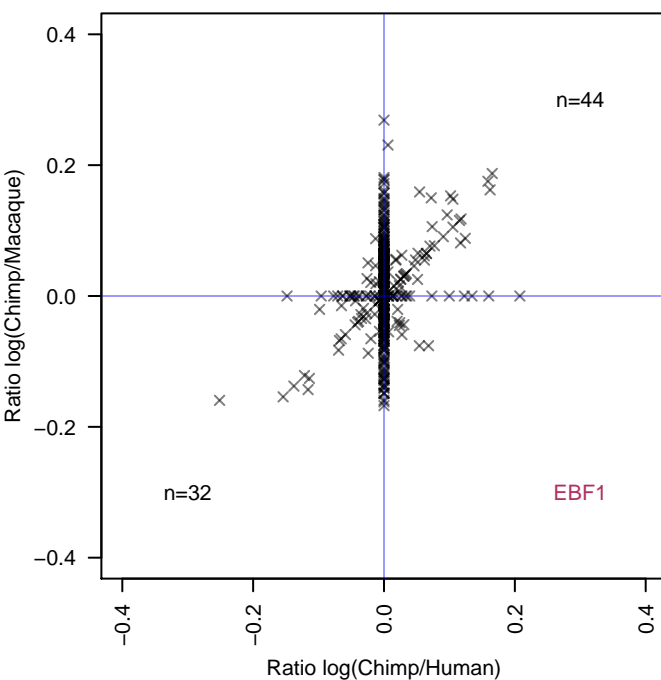

ChimpDownFibroblast.final.bed

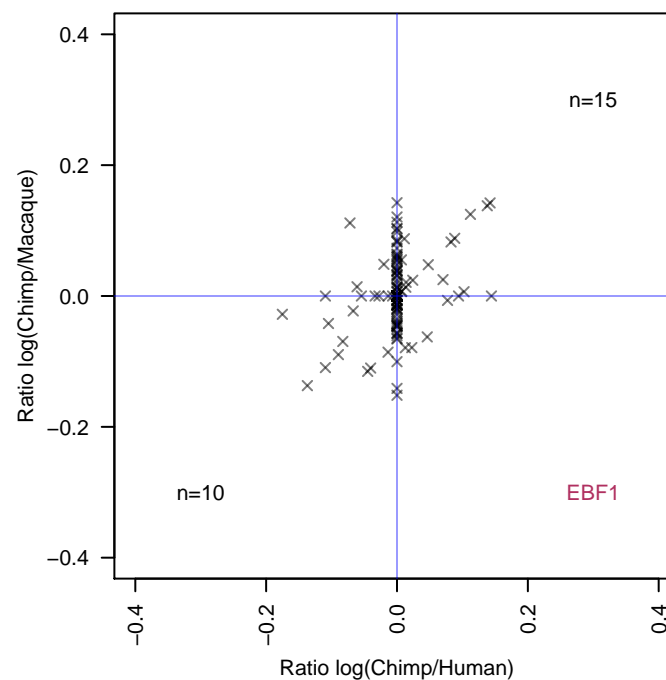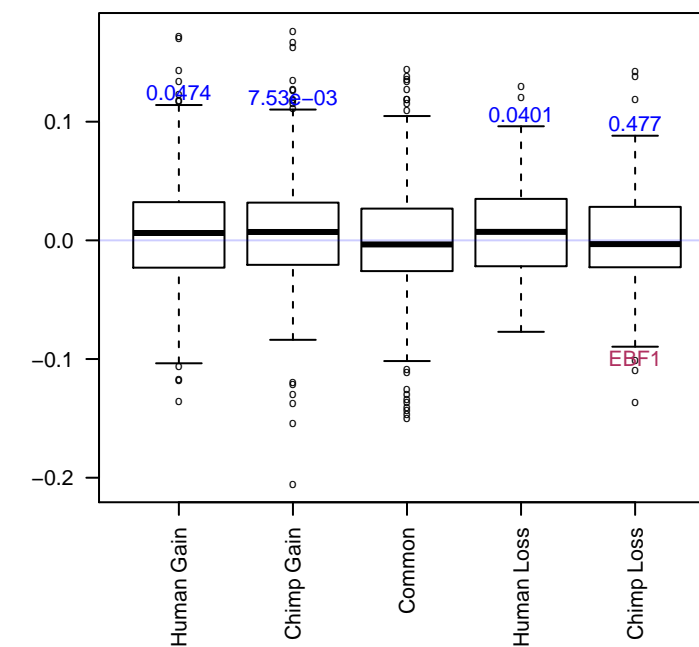

113 HumanUpFibroblast.final.bed

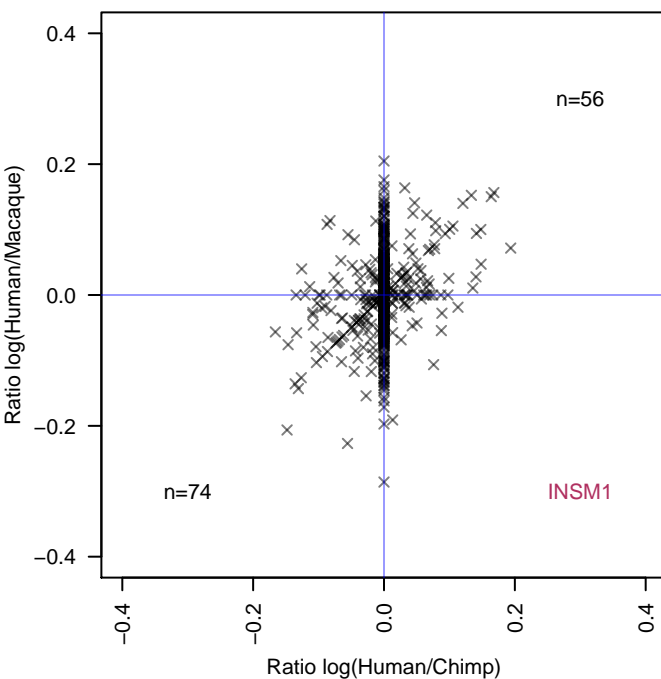

HumanDownFibroblast.final.bed

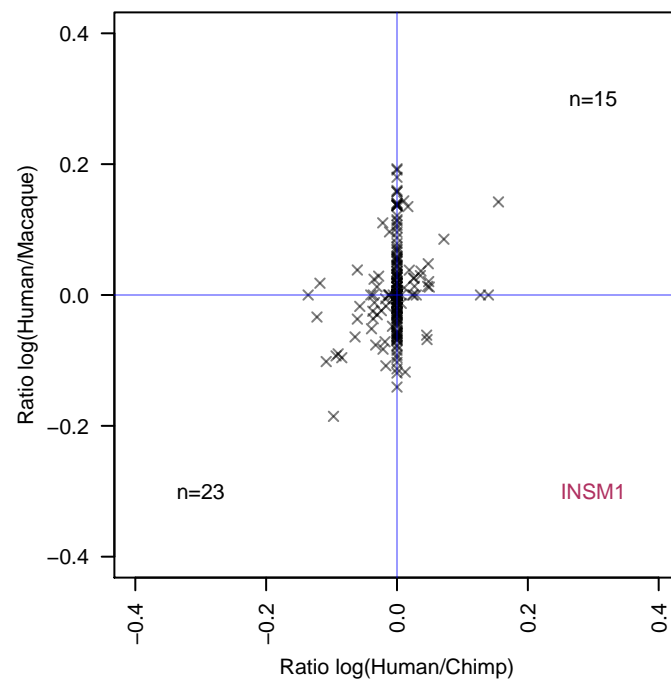

commonFibroblast.final.bed

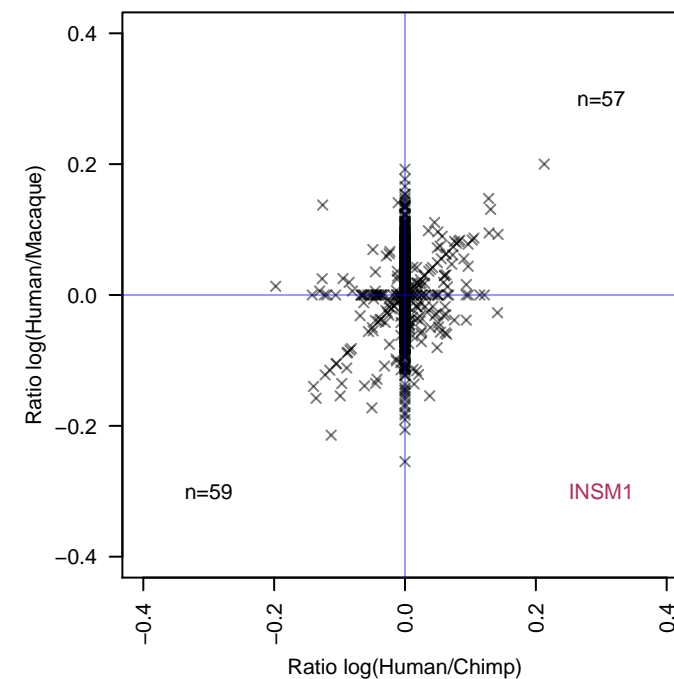

ChimpUpFibroblast.final.bed

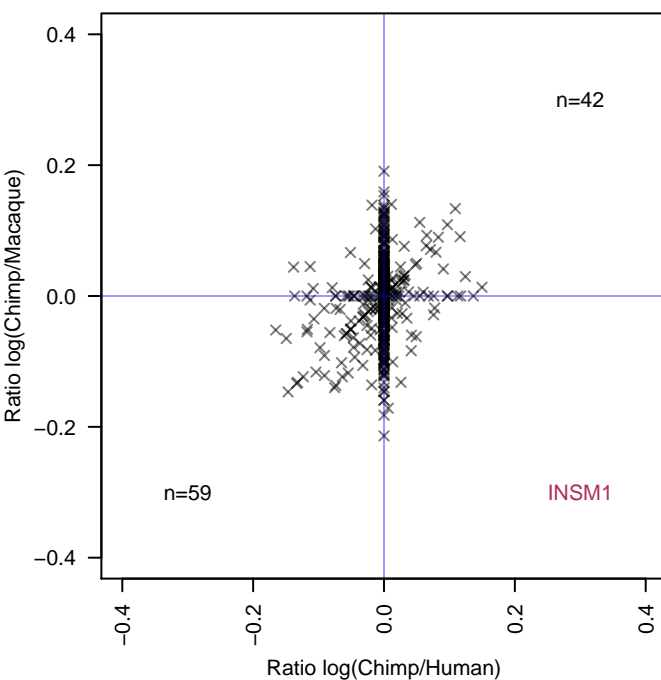

ChimpDownFibroblast.final.bed

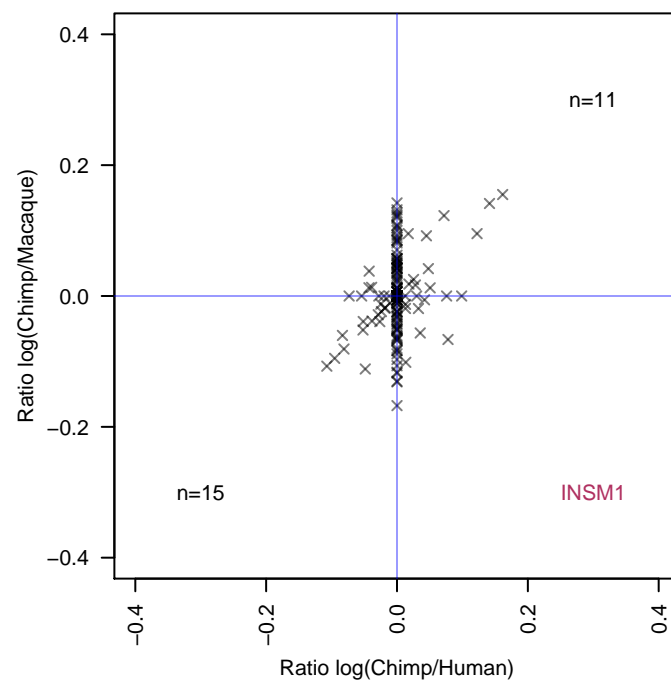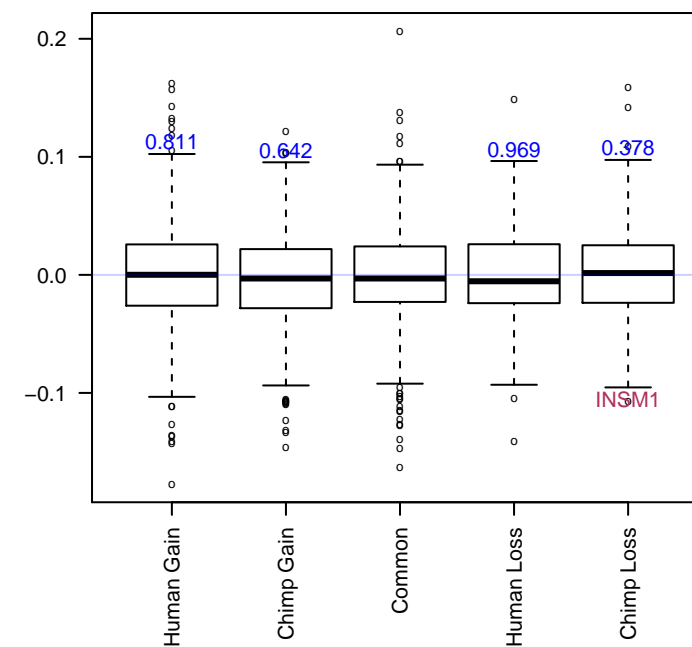

114 HumanUpFibroblast.final.bed

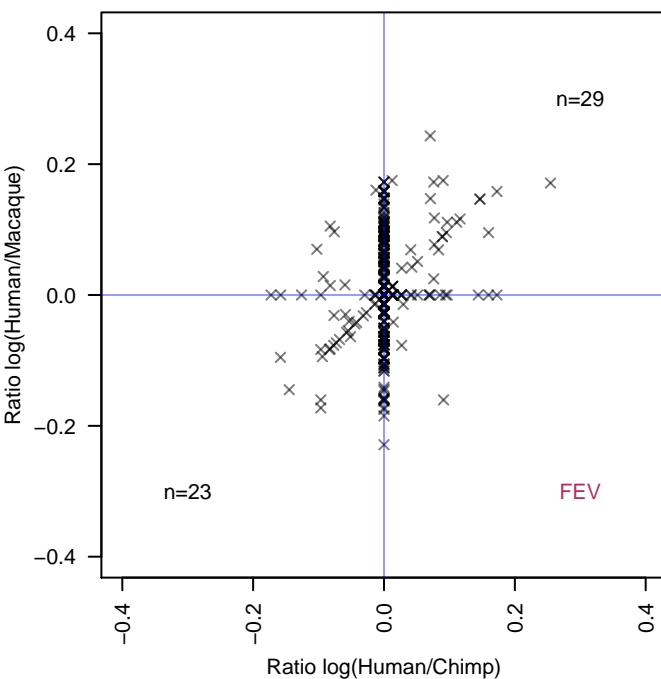

HumanDownFibroblast.final.bed

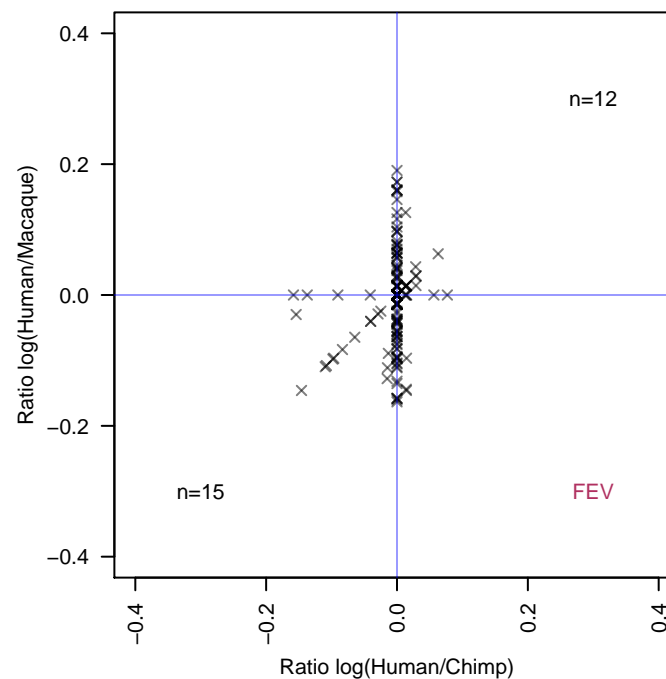

commonFibroblast.final.bed

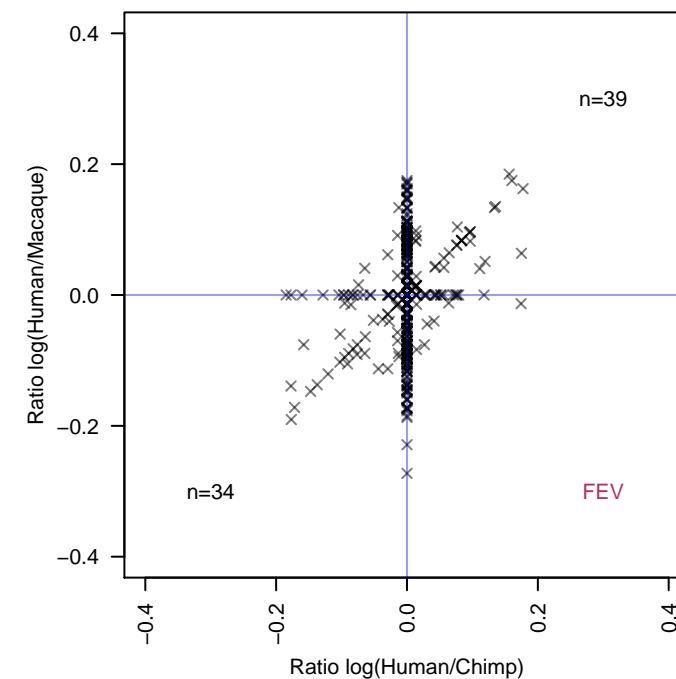

ChimpUpFibroblast.final.bed

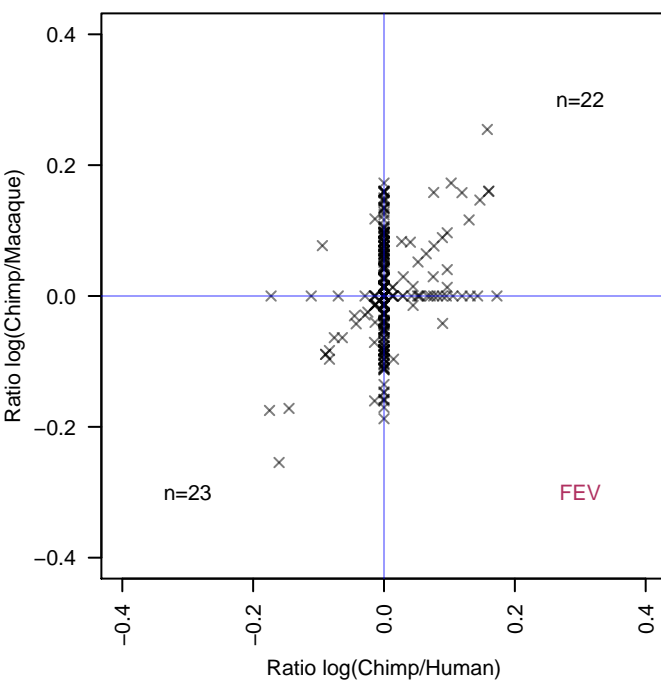

ChimpDownFibroblast.final.bed

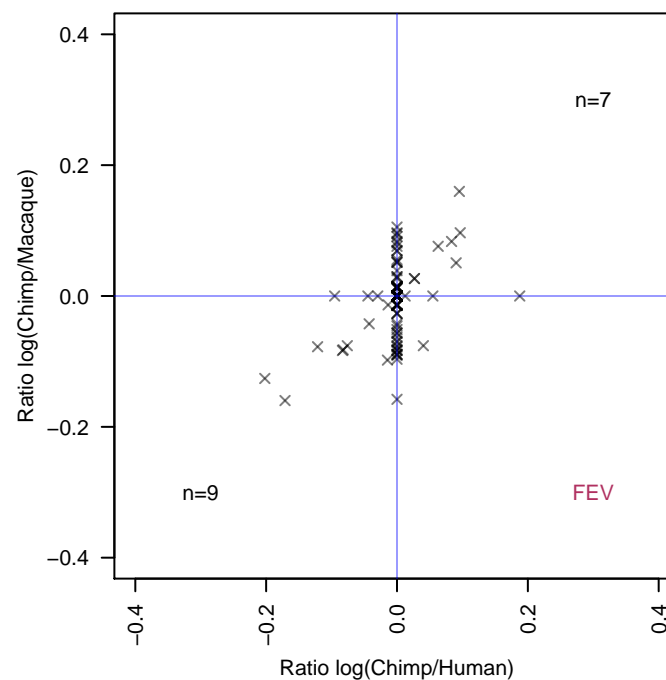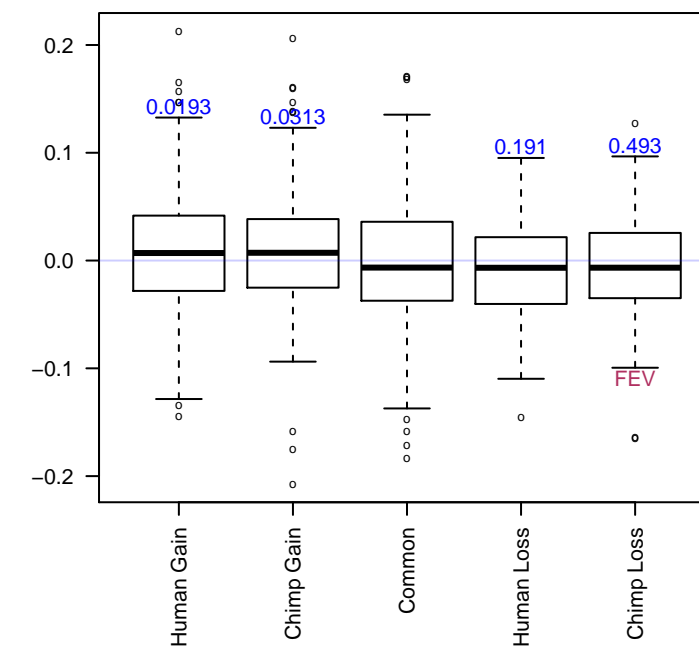

115 HumanUpFibroblast.final.bed

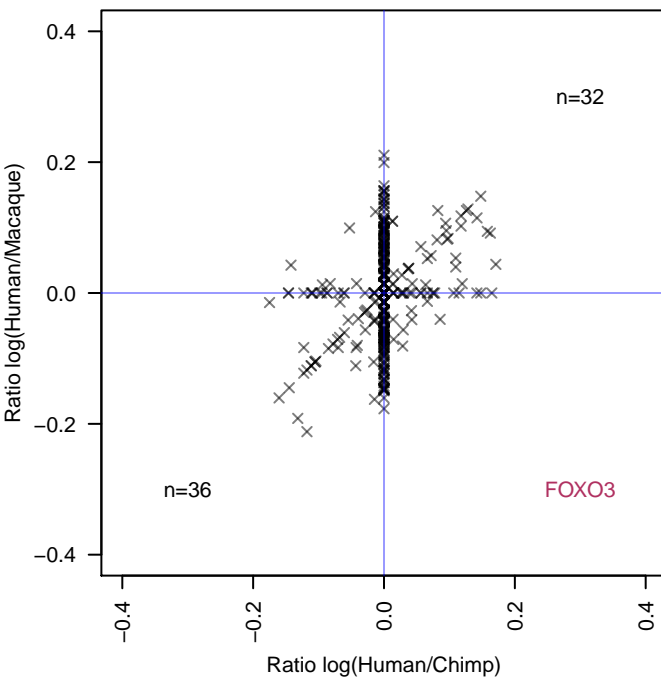

HumanDownFibroblast.final.bed

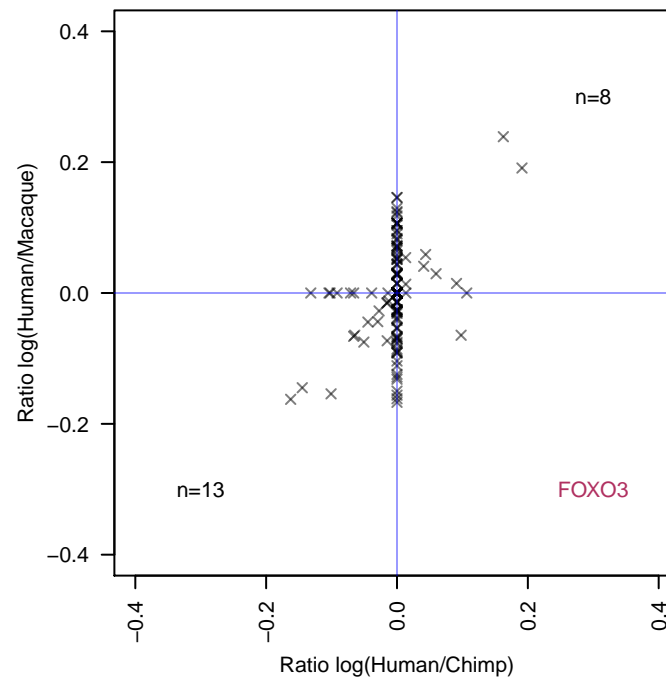

commonFibroblast.final.bed

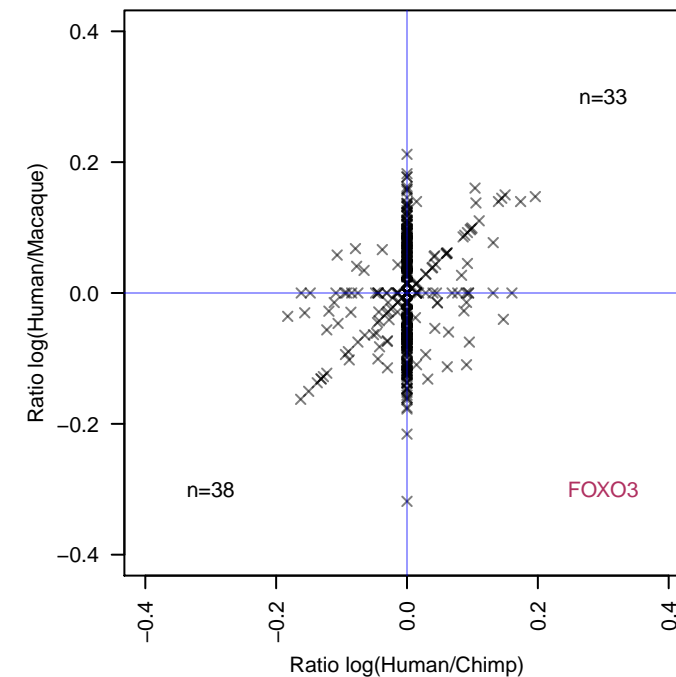

ChimpUpFibroblast.final.bed

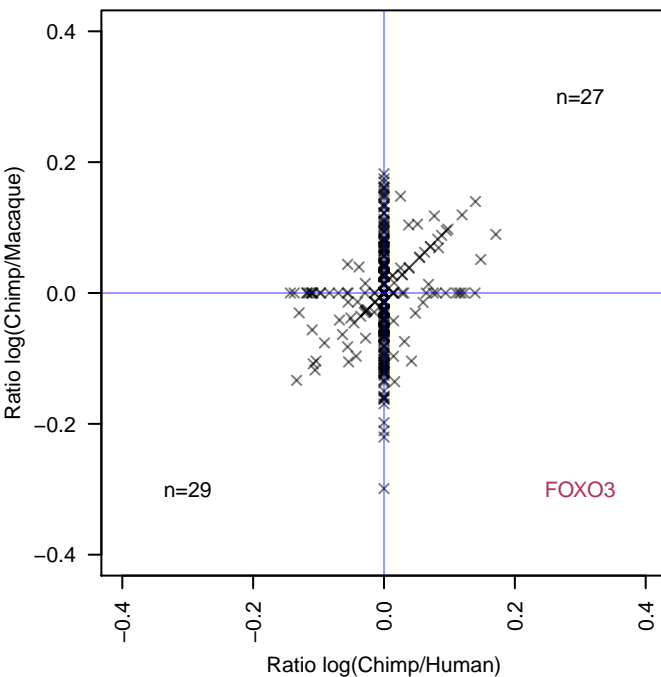

ChimpDownFibroblast.final.bed

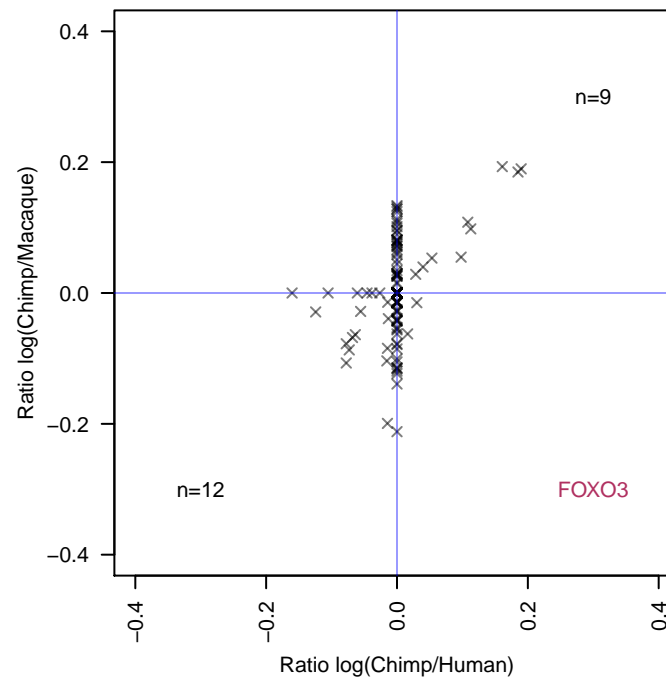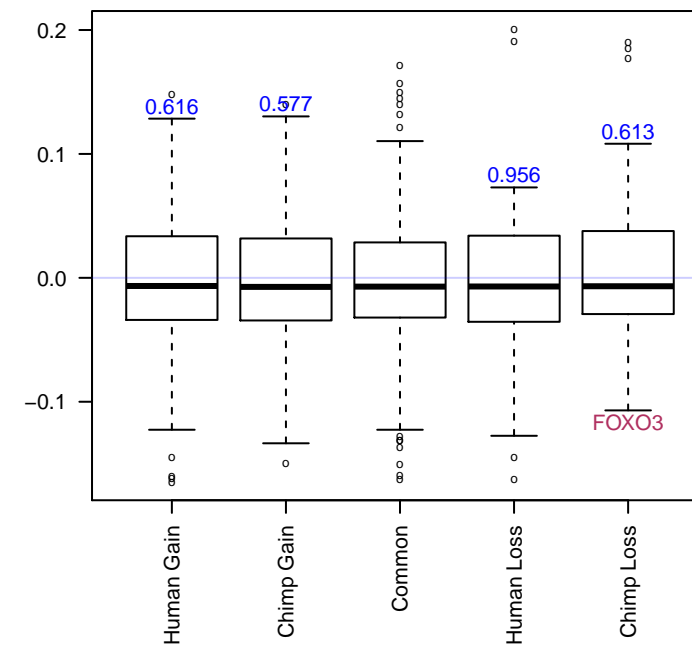

116 HumanUpFibroblast.final.bed

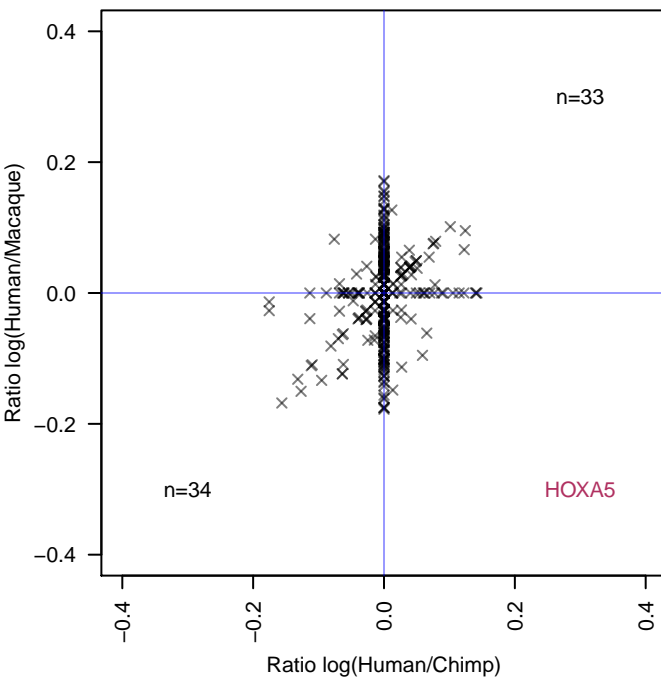

HumanDownFibroblast.final.bed

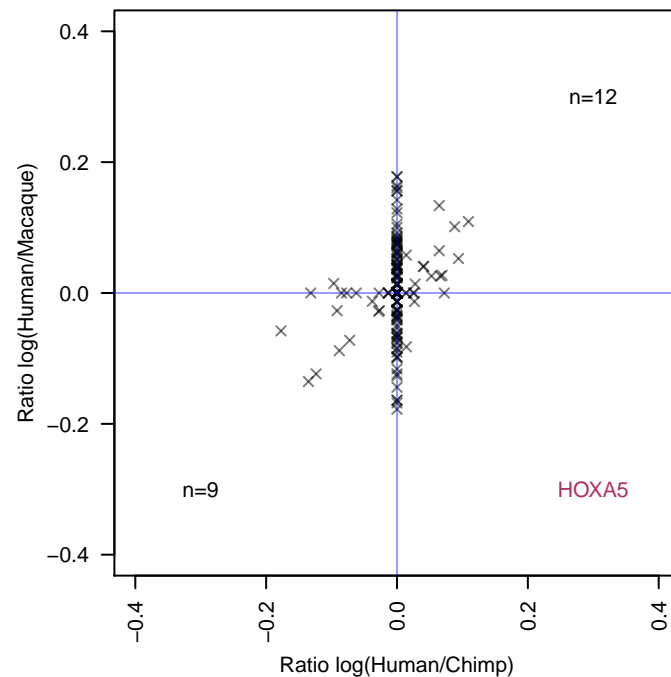

commonFibroblast.final.bed

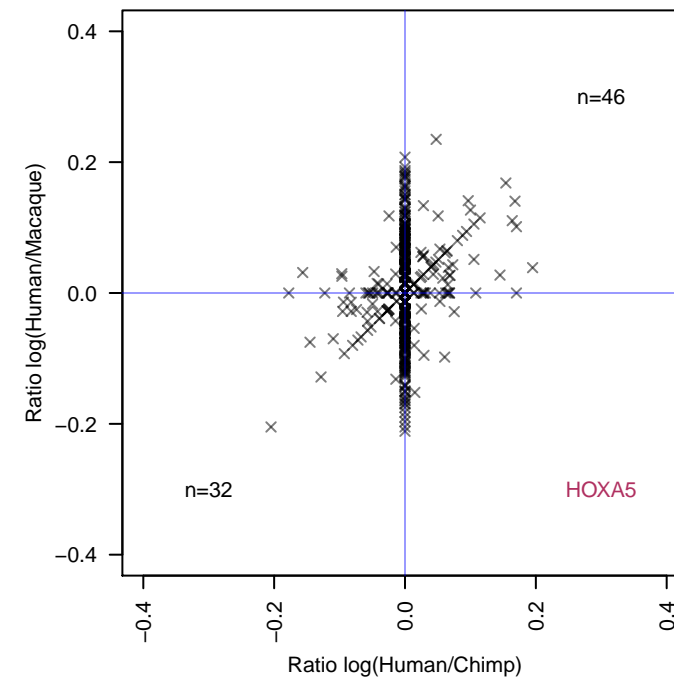

ChimpUpFibroblast.final.bed

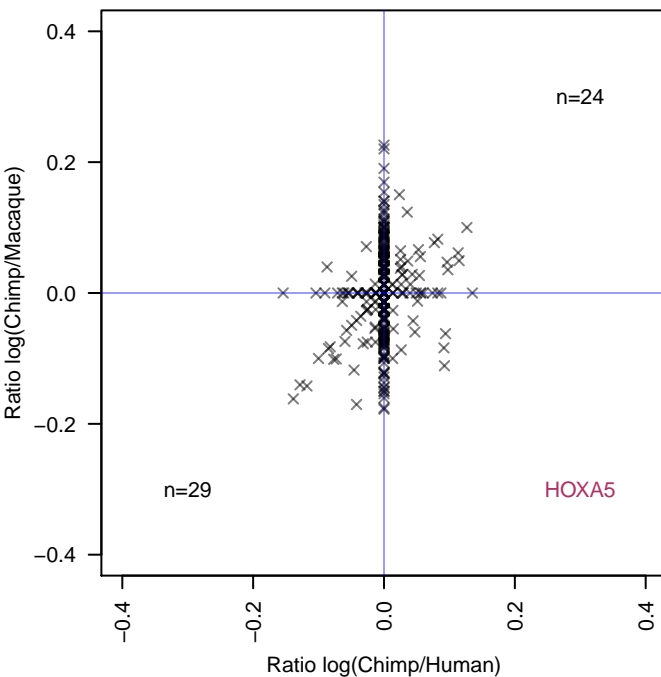

ChimpDownFibroblast.final.bed

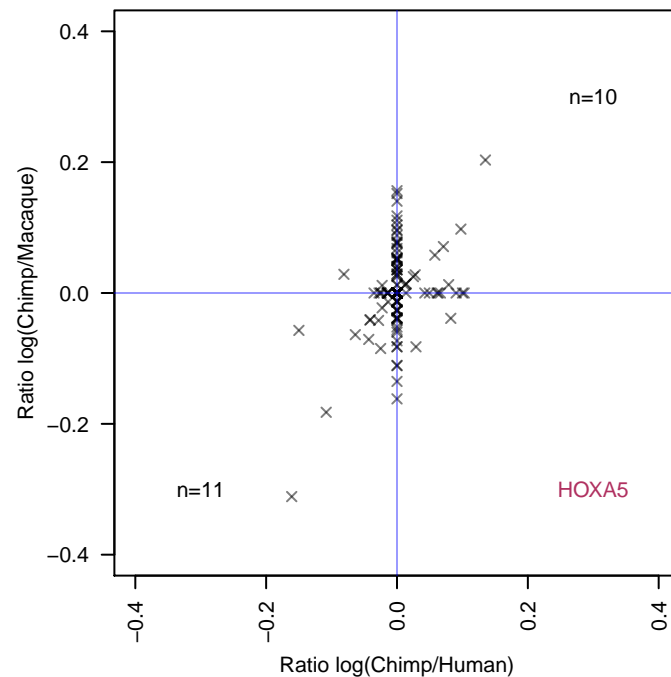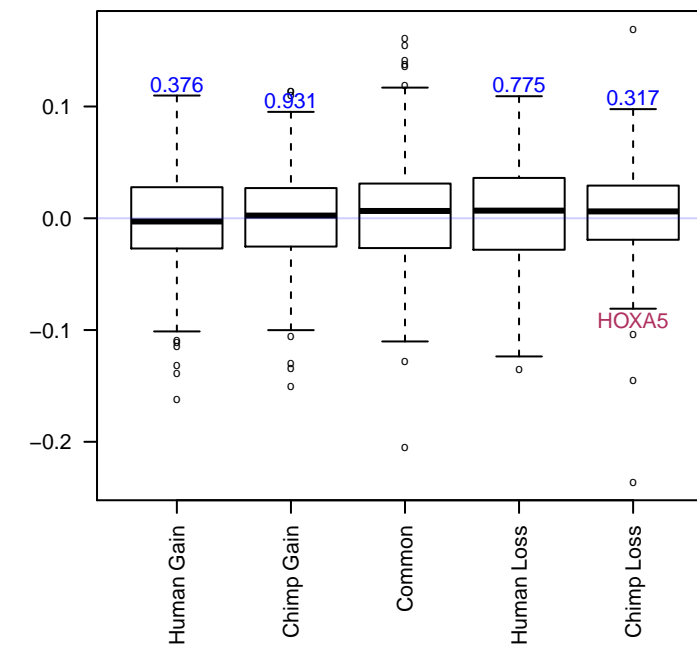

117 HumanUpFibroblast.final.bed

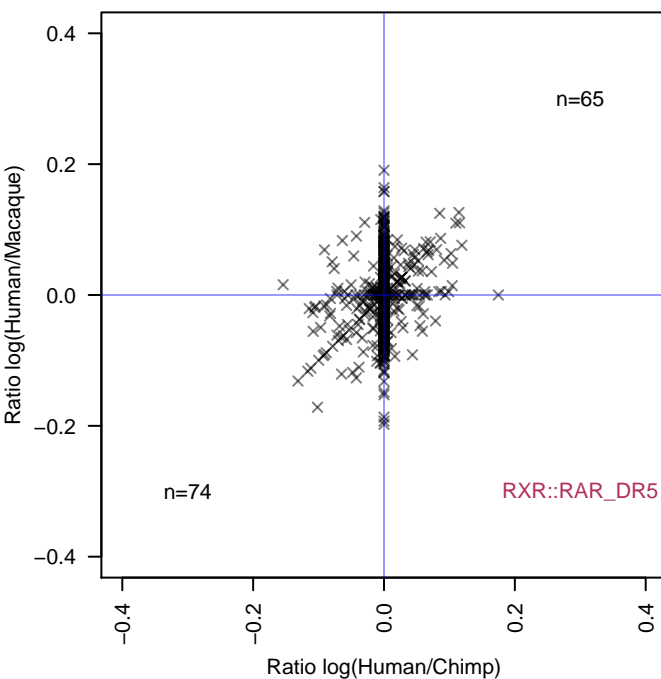

HumanDownFibroblast.final.bed

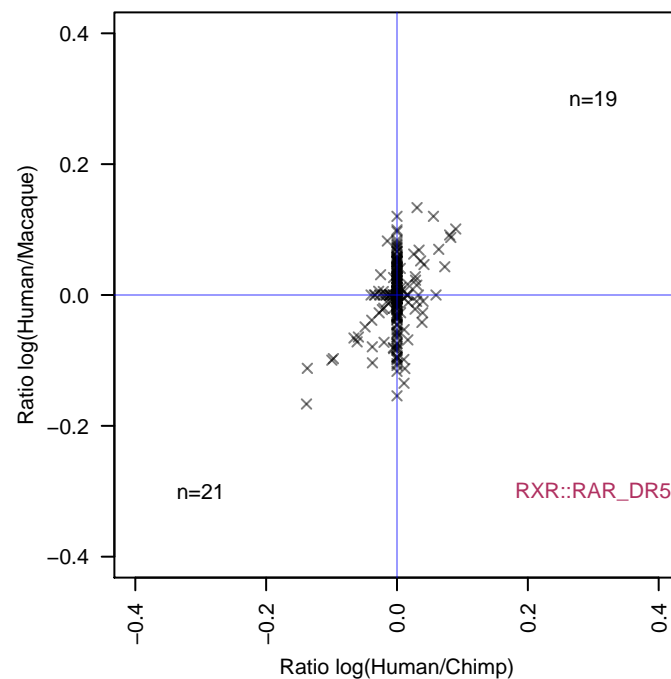

commonFibroblast.final.bed

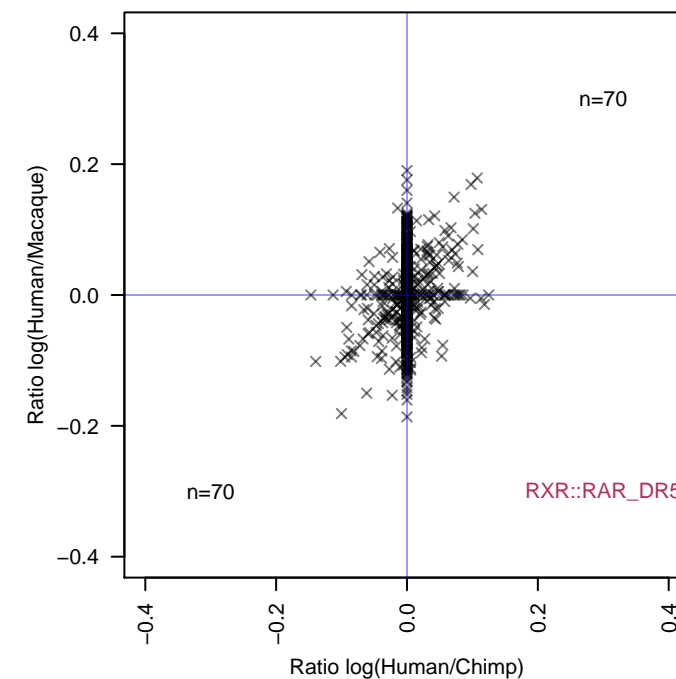

ChimpUpFibroblast.final.bed

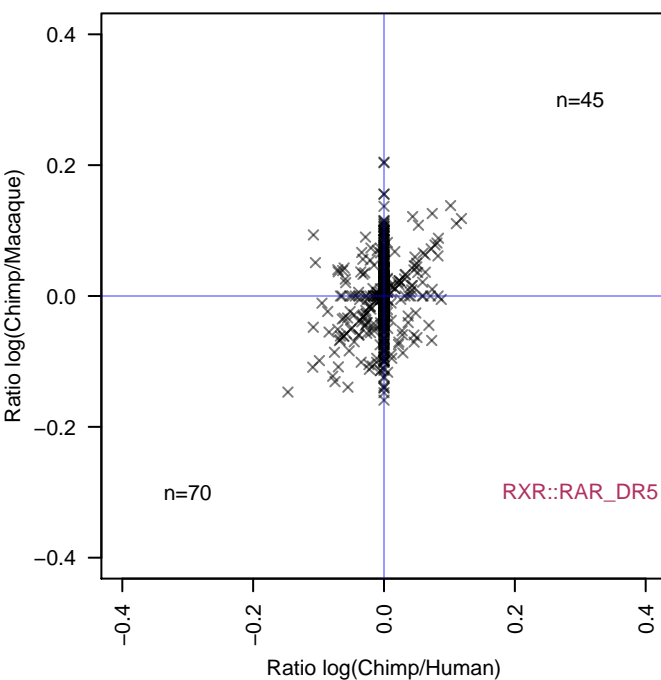

ChimpDownFibroblast.final.bed

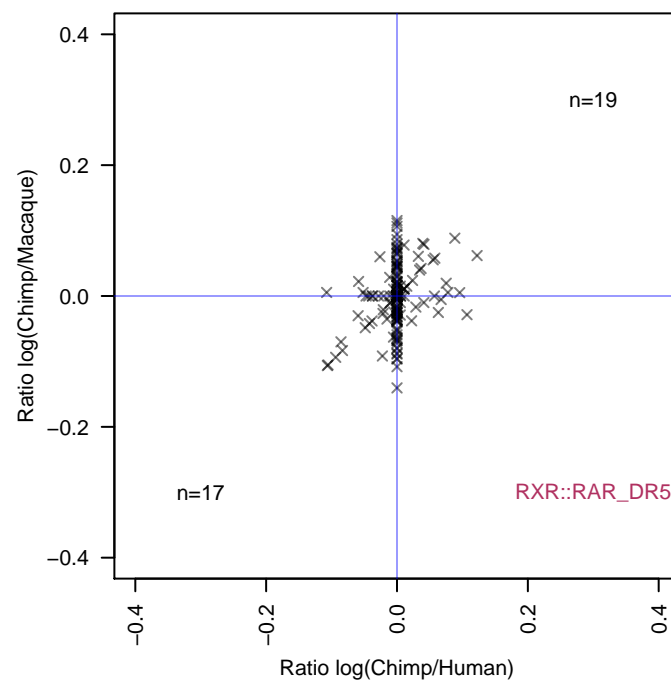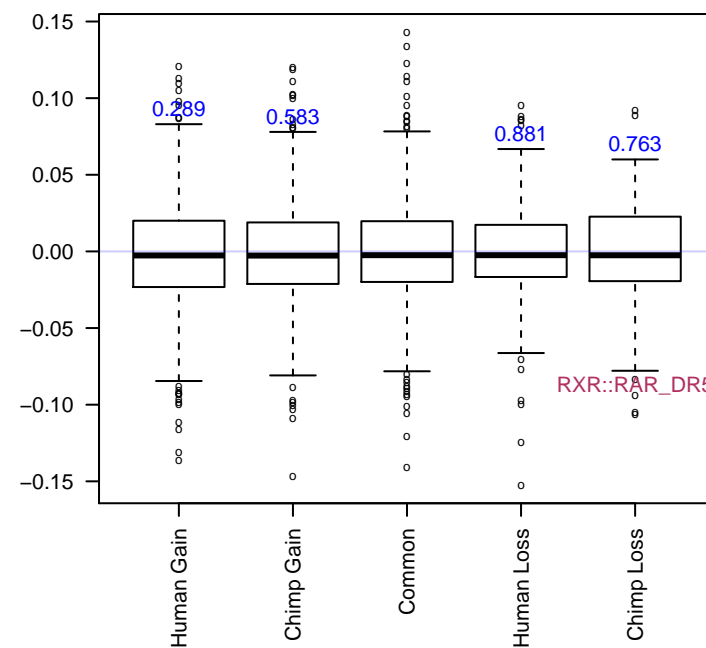

118 HumanUpFibroblast.final.bed

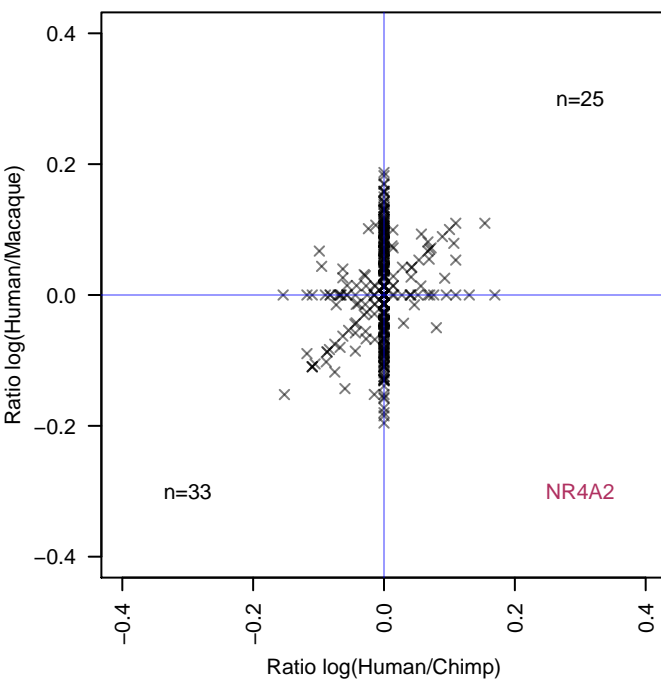

HumanDownFibroblast.final.bed

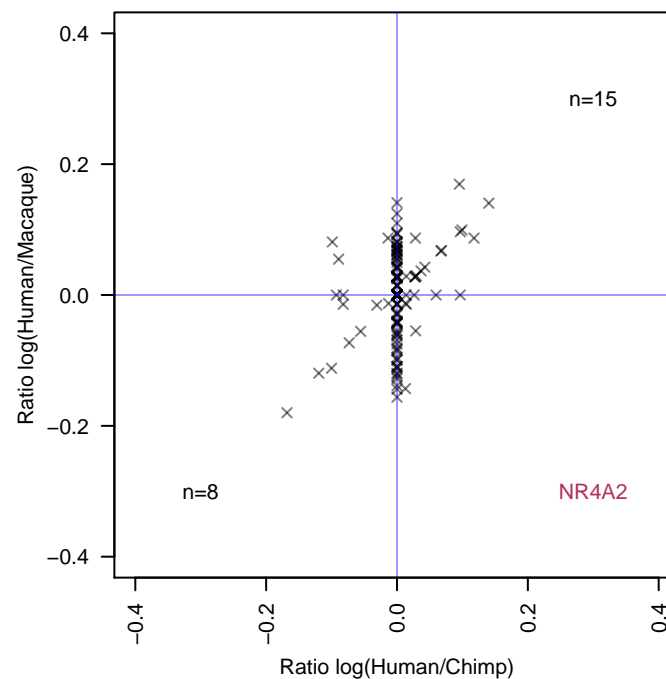

commonFibroblast.final.bed

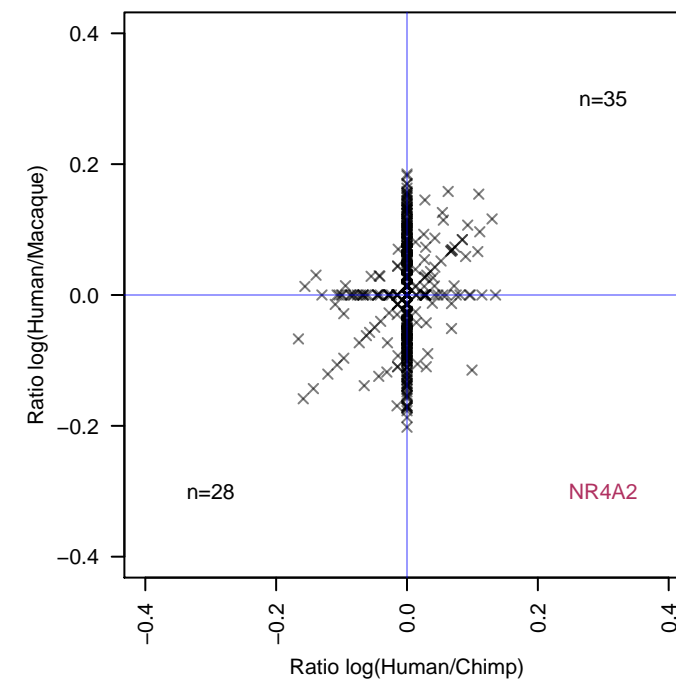

ChimpUpFibroblast.final.bed

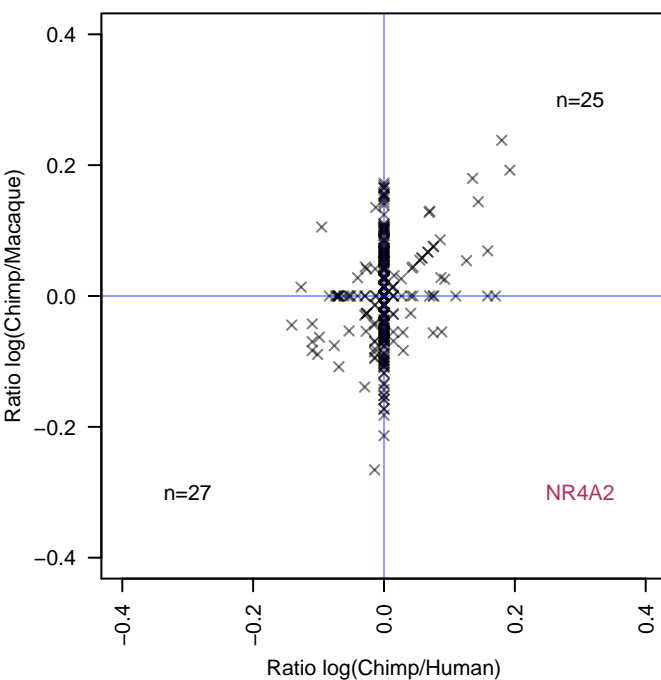

ChimpDownFibroblast.final.bed

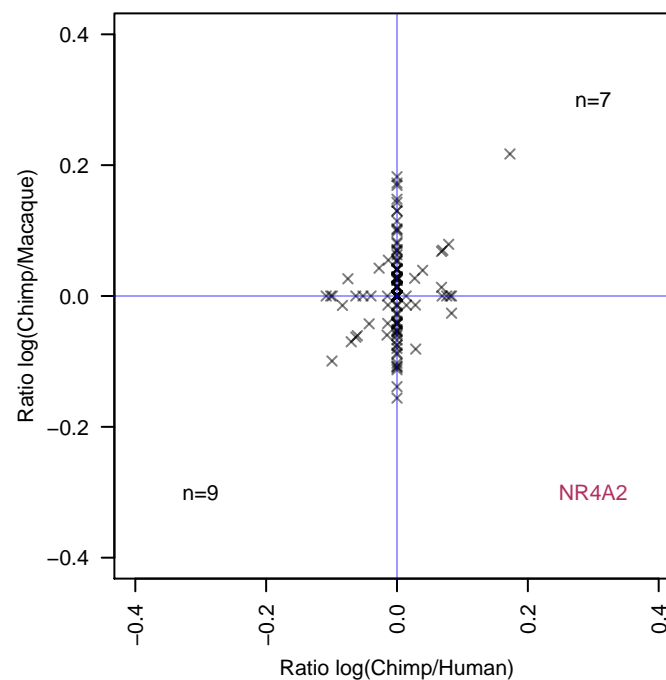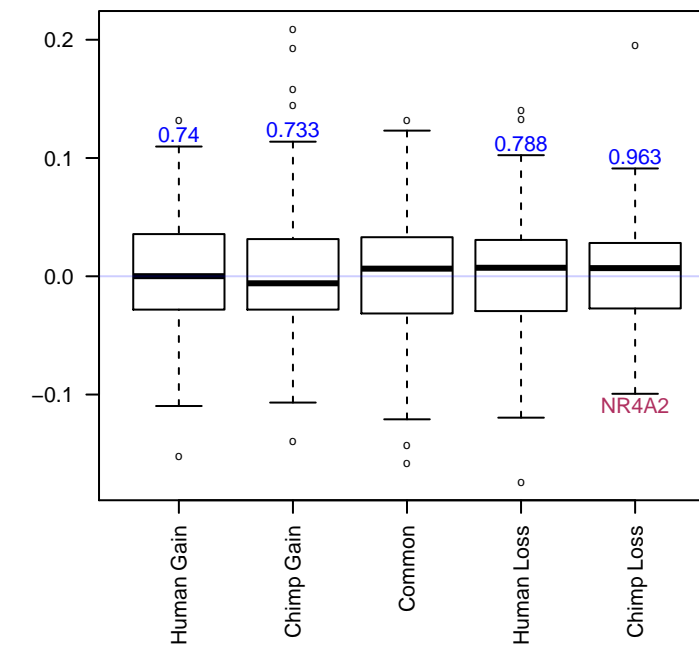

119 HumanUpFibroblast.final.bed

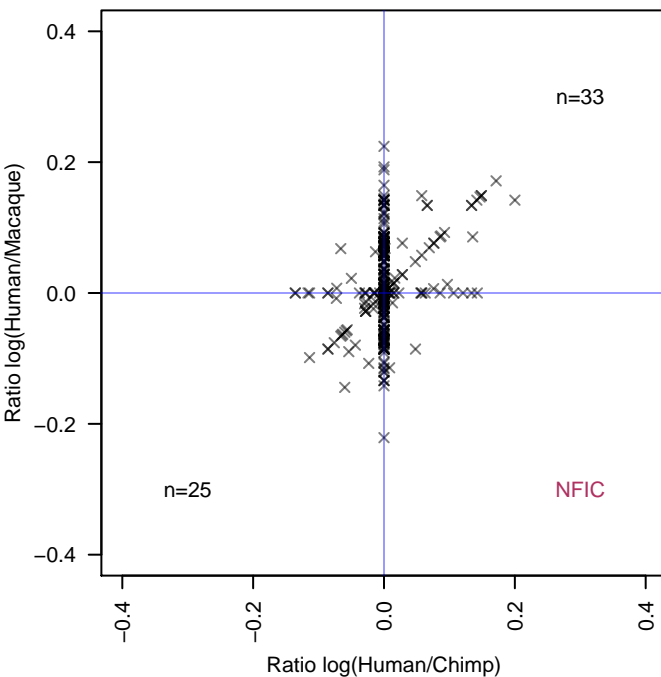

HumanDownFibroblast.final.bed

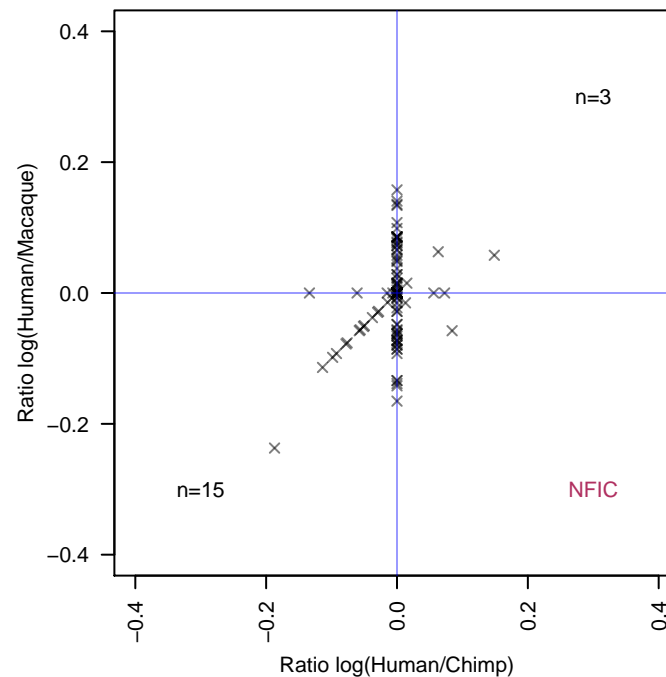

commonFibroblast.final.bed

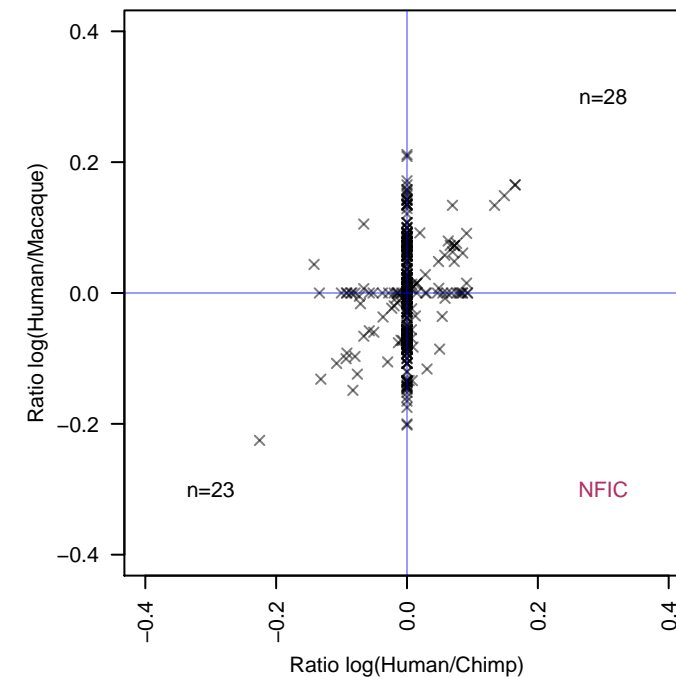

ChimpUpFibroblast.final.bed

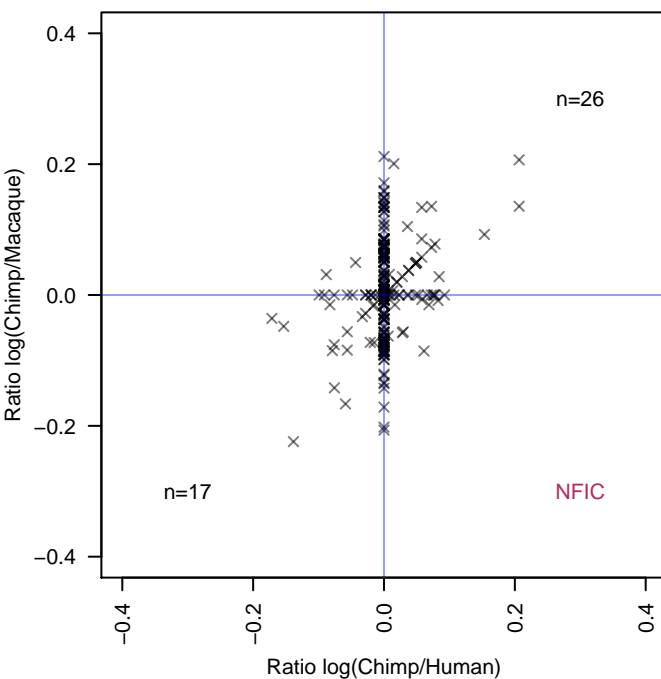

ChimpDownFibroblast.final.bed

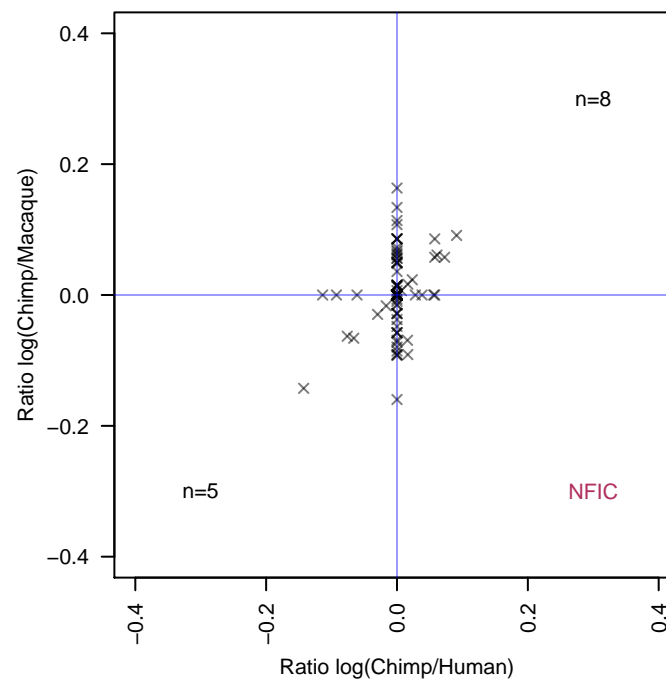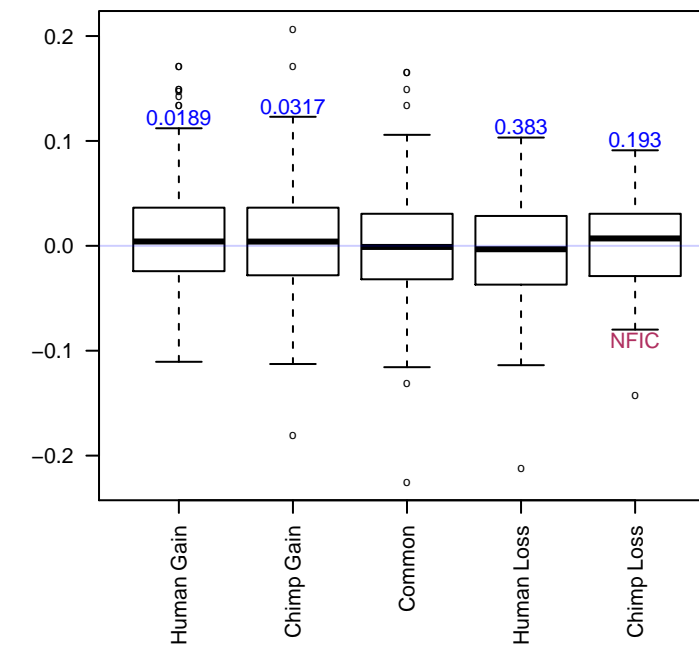

120 HumanUpFibroblast.final.bed

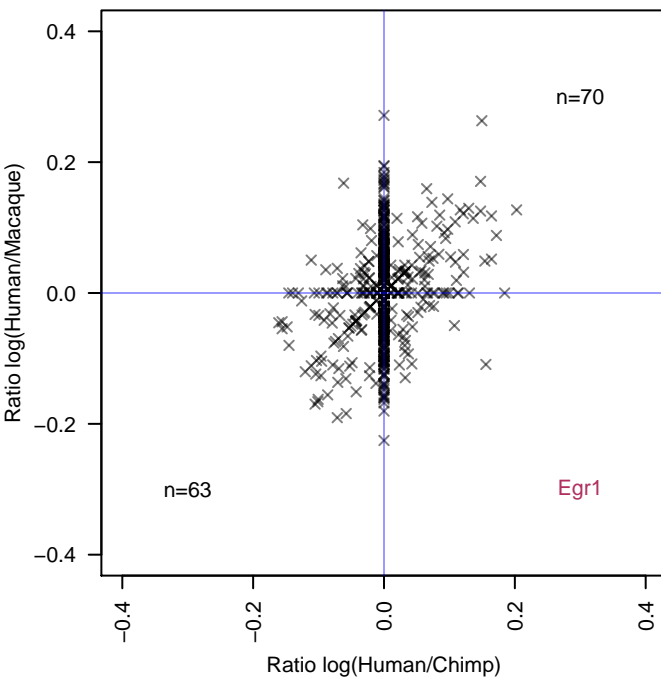

HumanDownFibroblast.final.bed

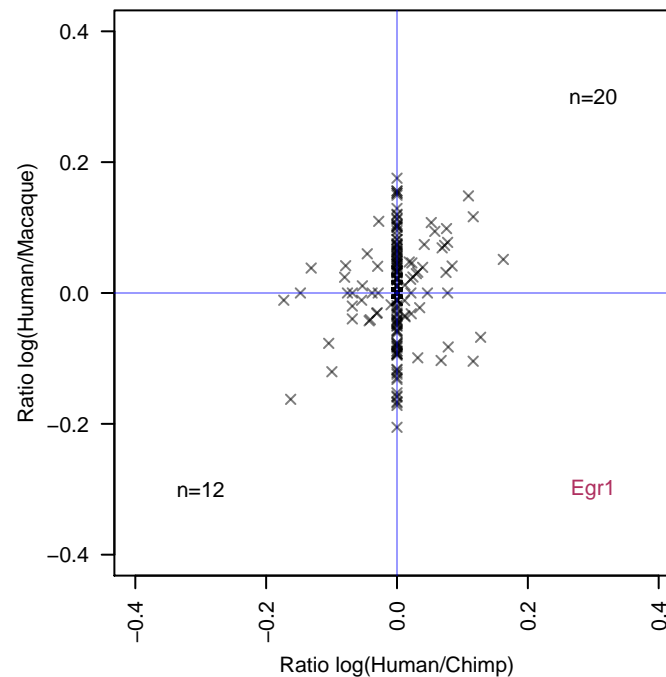

commonFibroblast.final.bed

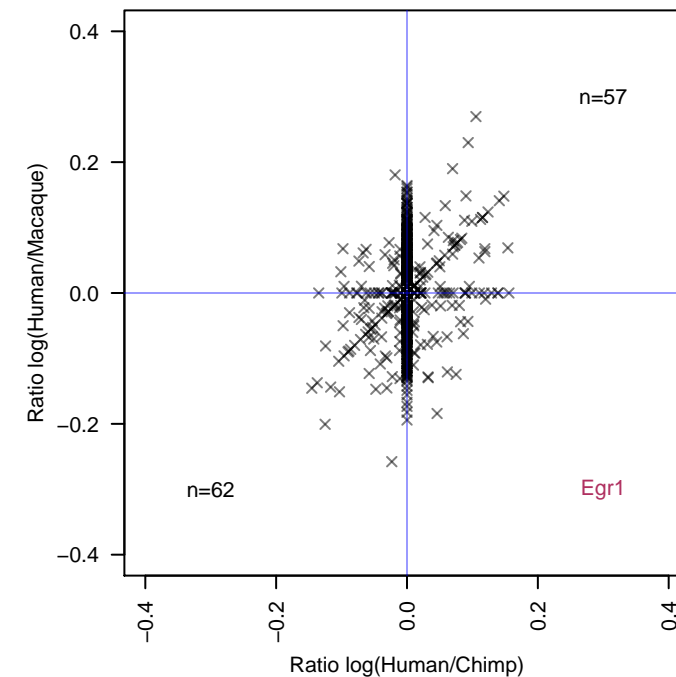

ChimpUpFibroblast.final.bed

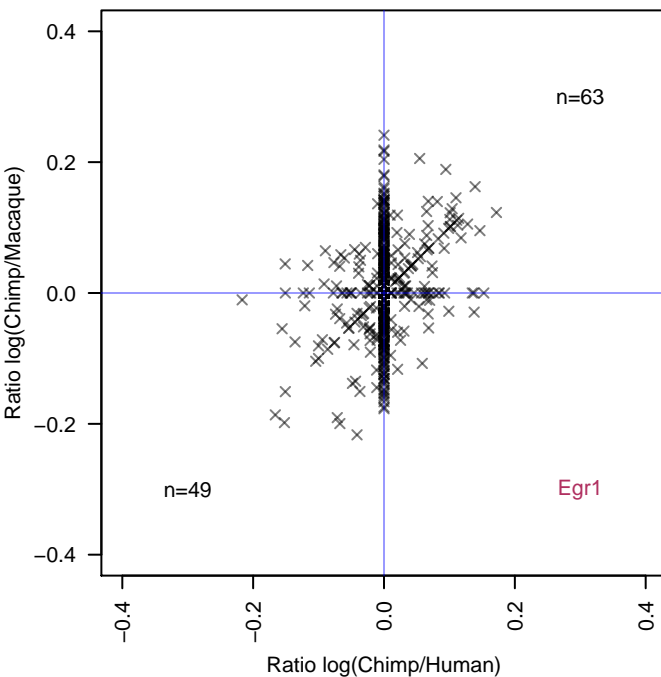

ChimpDownFibroblast.final.bed

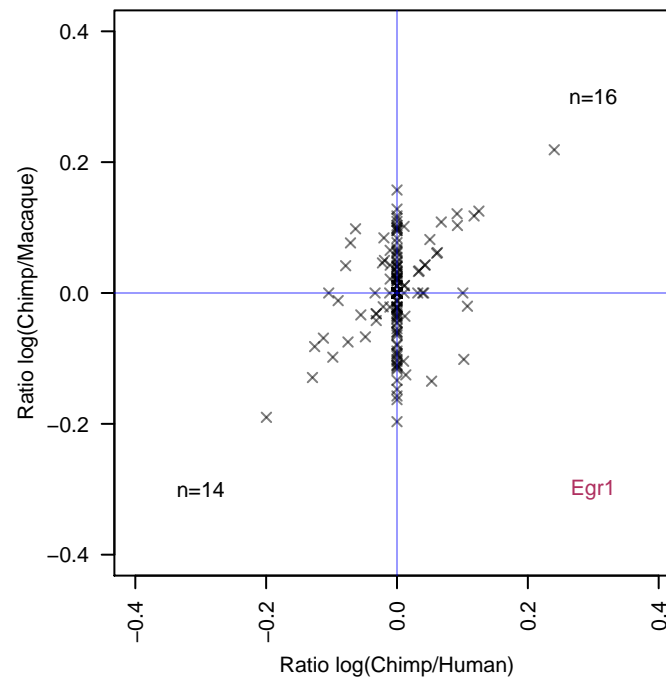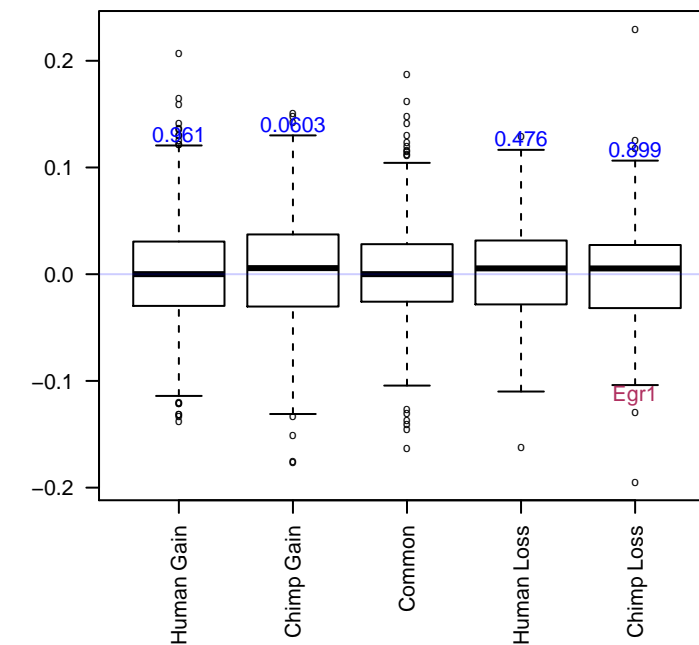

121 HumanUpFibroblast.final.bed

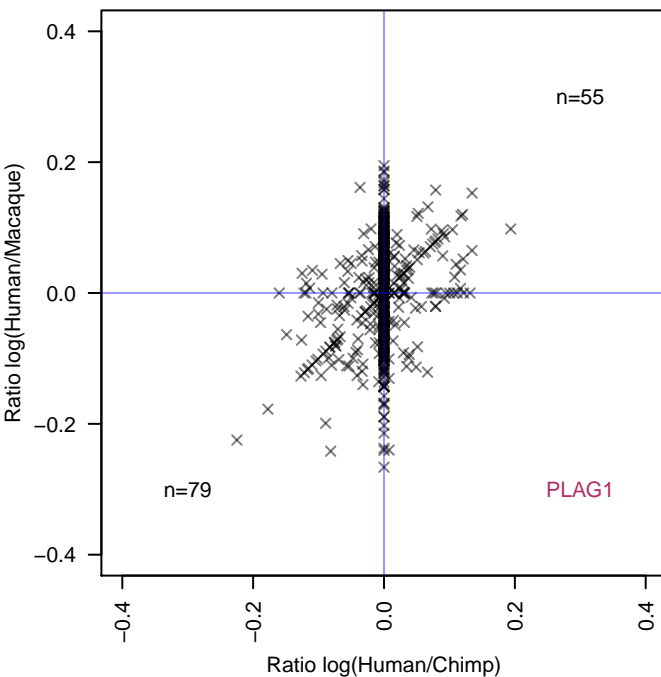

HumanDownFibroblast.final.bed

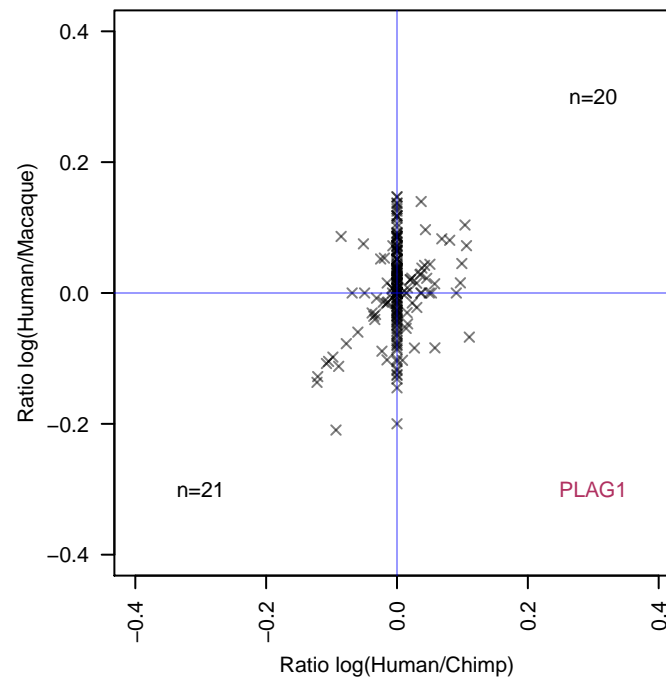

commonFibroblast.final.bed

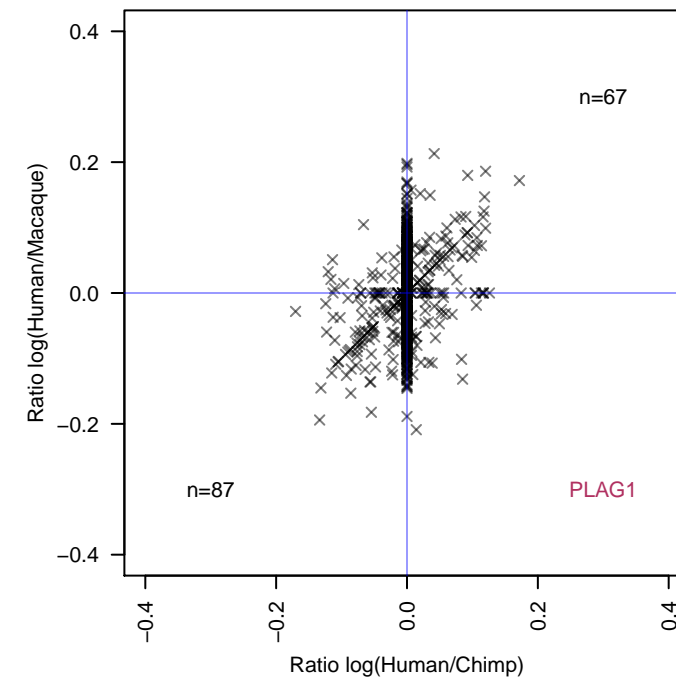

ChimpUpFibroblast.final.bed

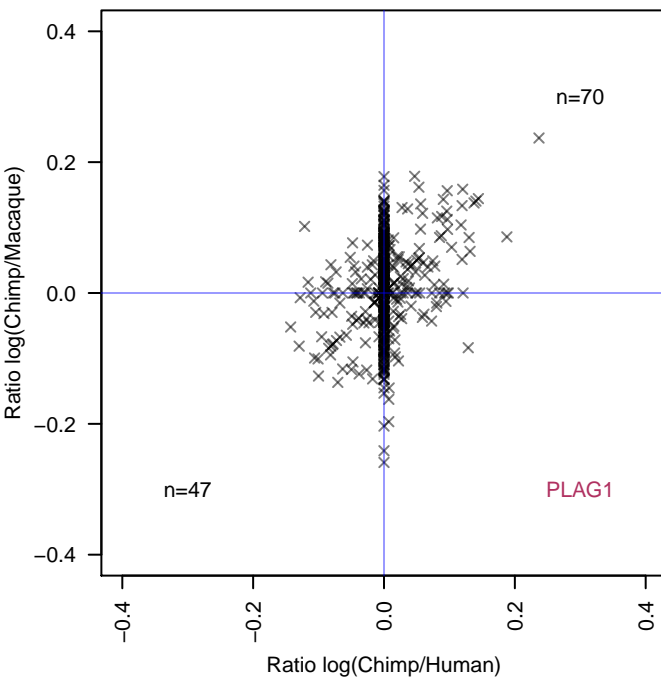

ChimpDownFibroblast.final.bed

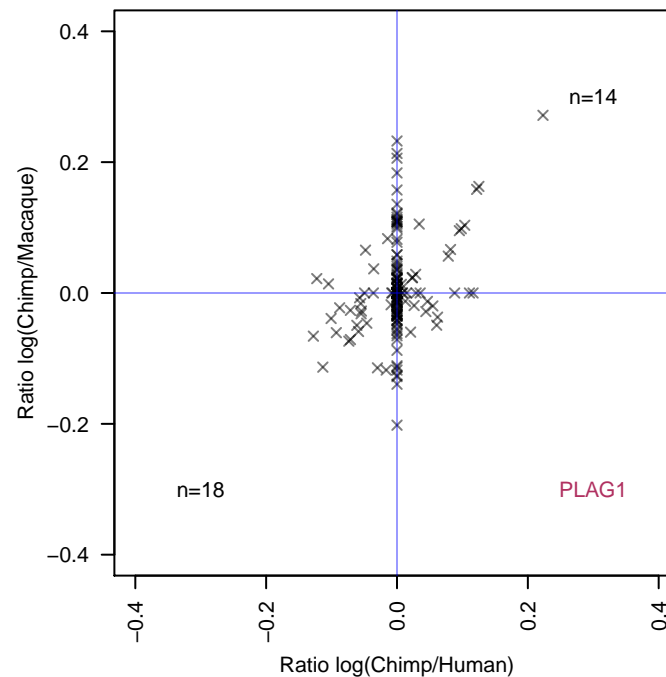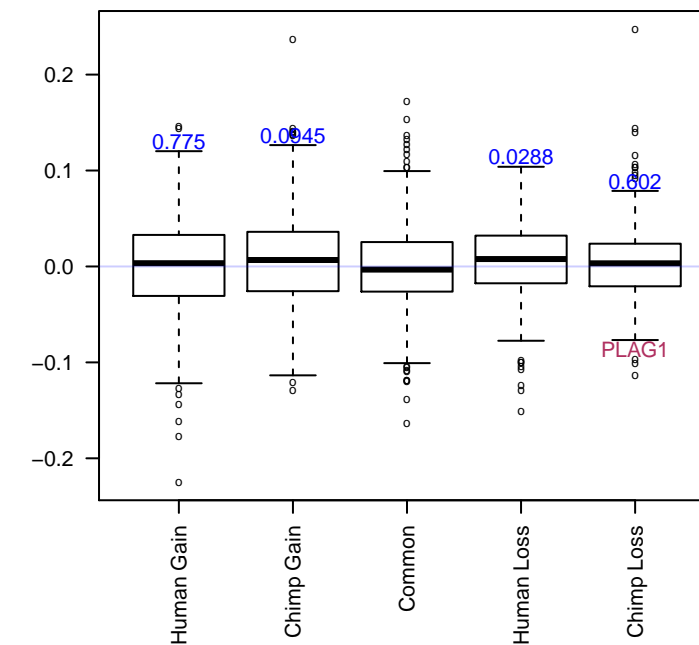

122 HumanUpFibroblast.final.bed

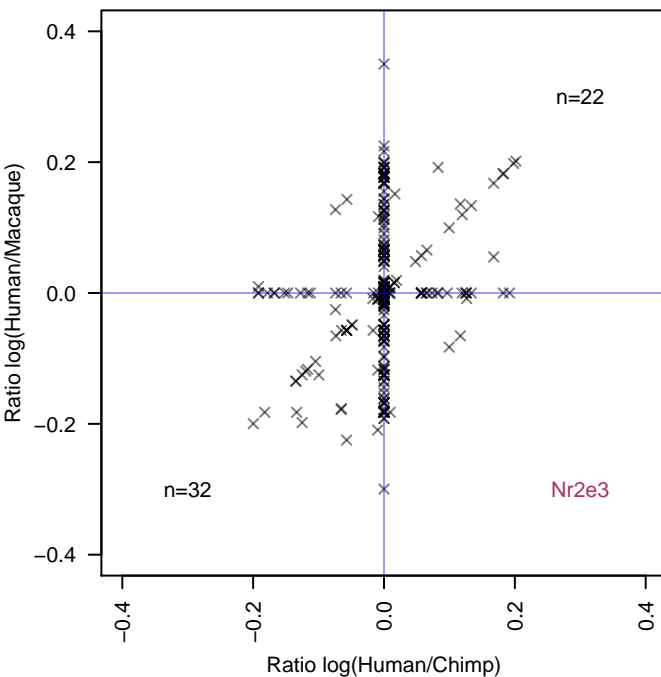

HumanDownFibroblast.final.bed

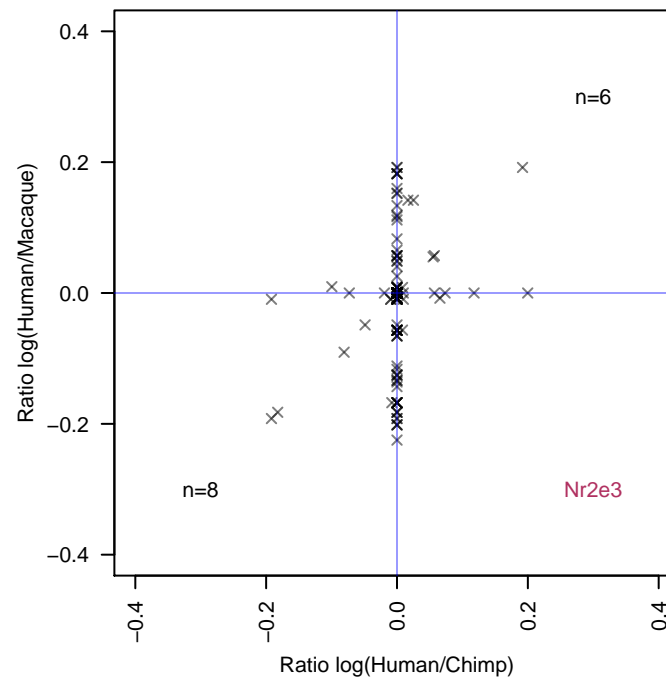

commonFibroblast.final.bed

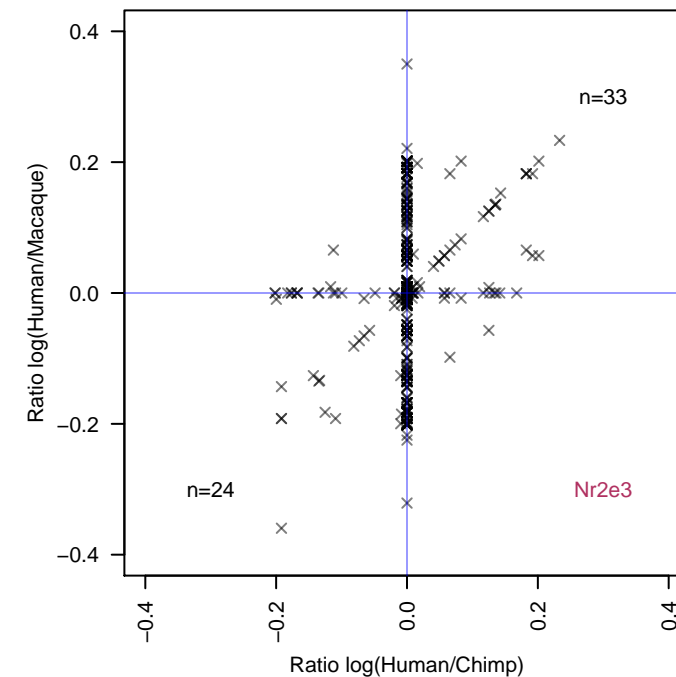

ChimpUpFibroblast.final.bed

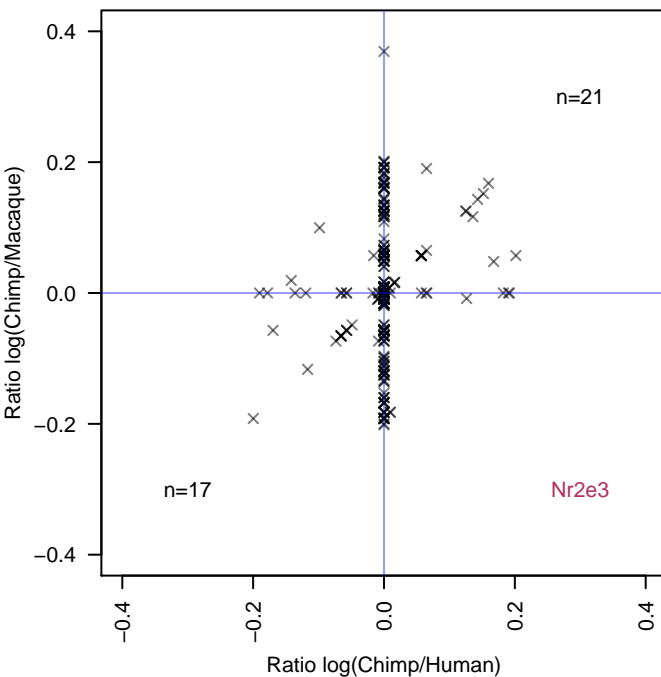

ChimpDownFibroblast.final.bed

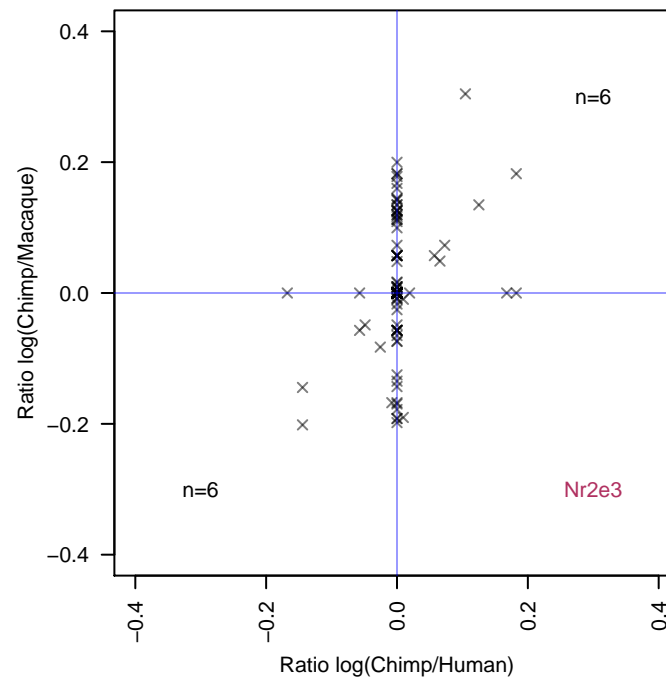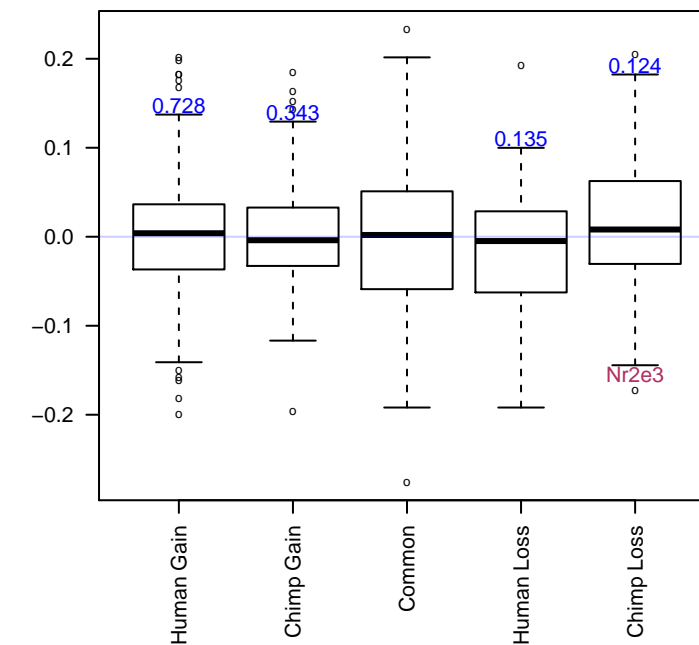

123 HumanUpFibroblast.final.bed

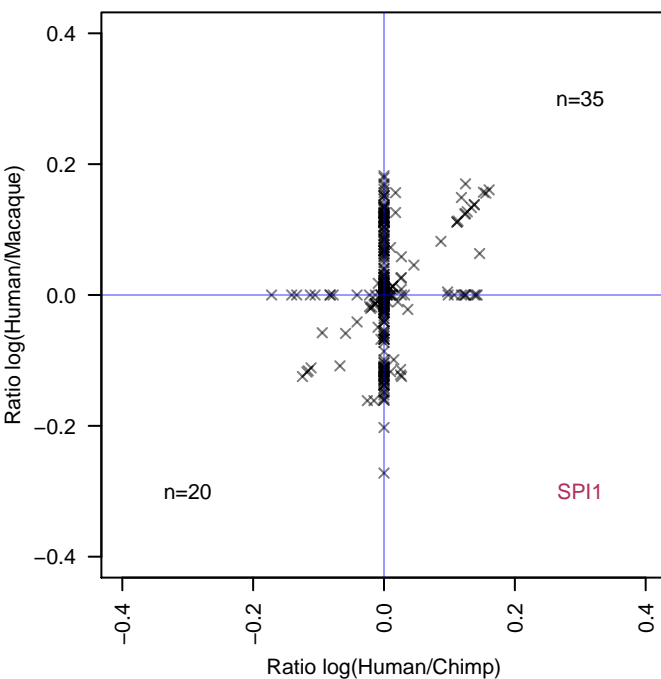

HumanDownFibroblast.final.bed

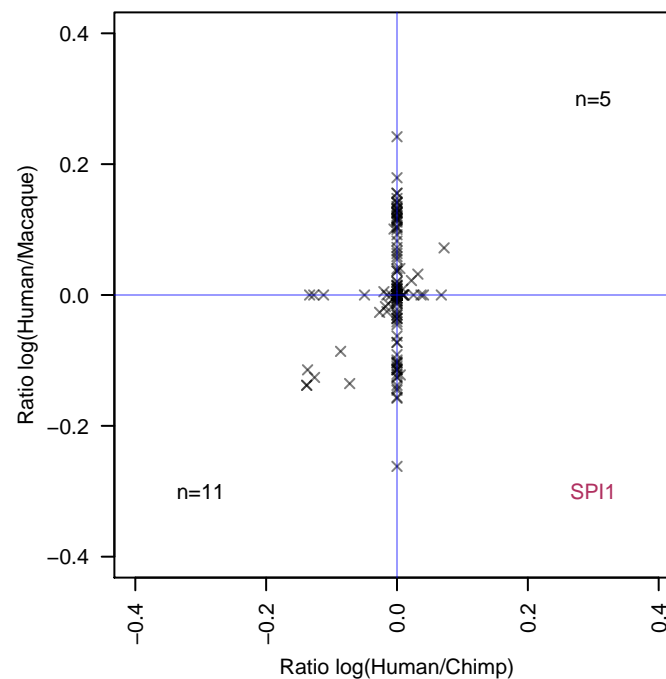

commonFibroblast.final.bed

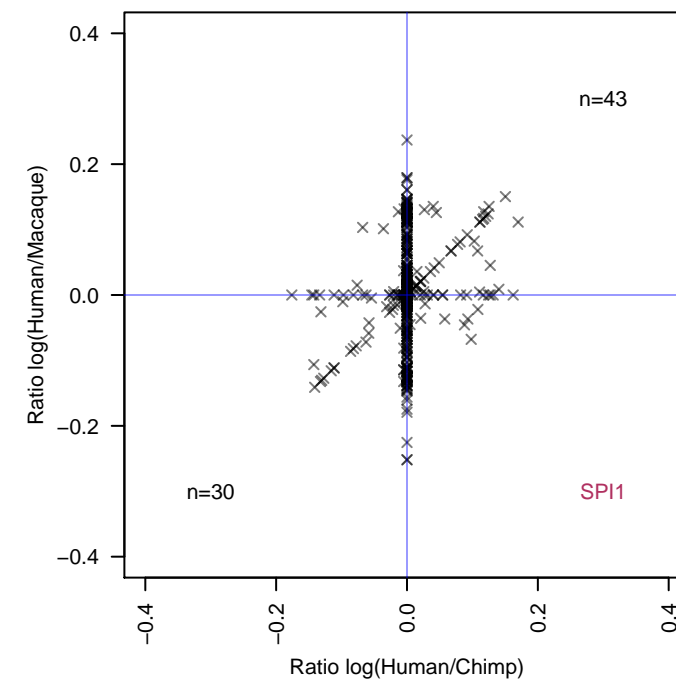

ChimpUpFibroblast.final.bed

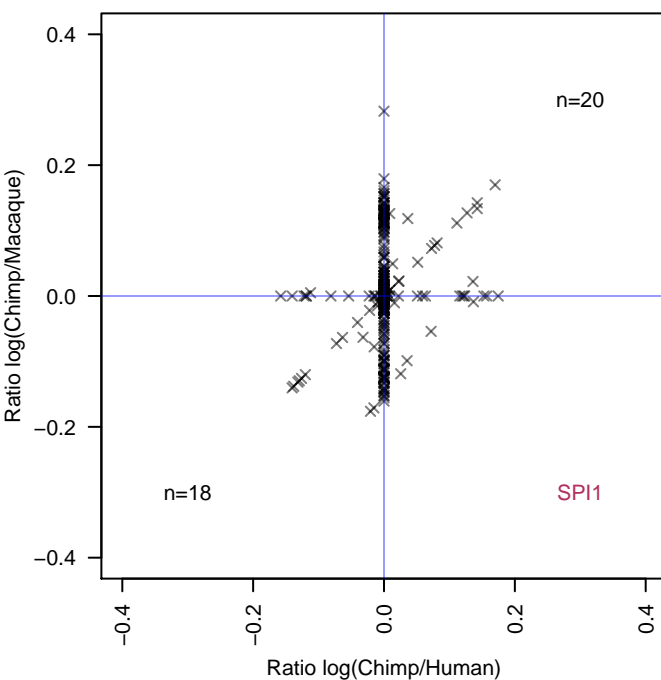

ChimpDownFibroblast.final.bed

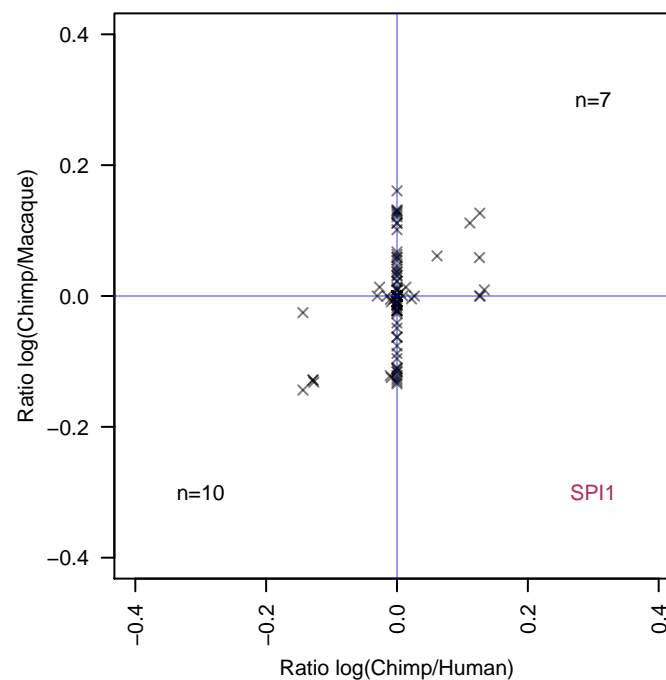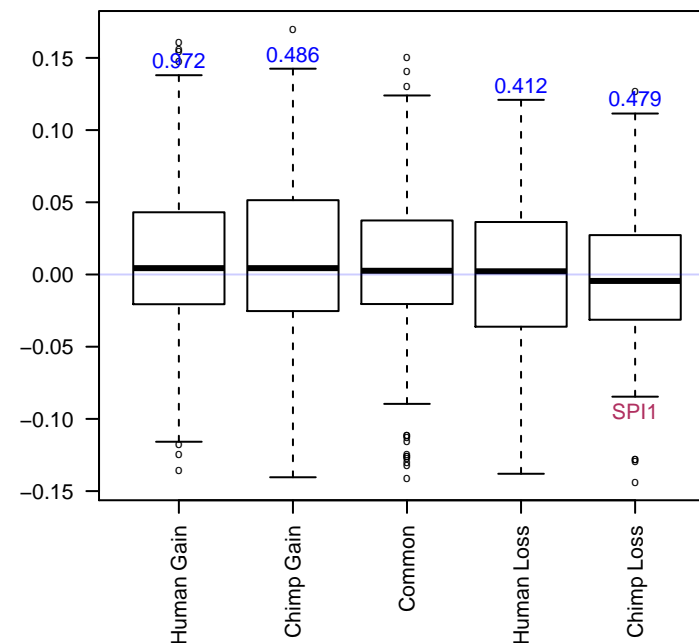

124 HumanUpFibroblast.final.bed

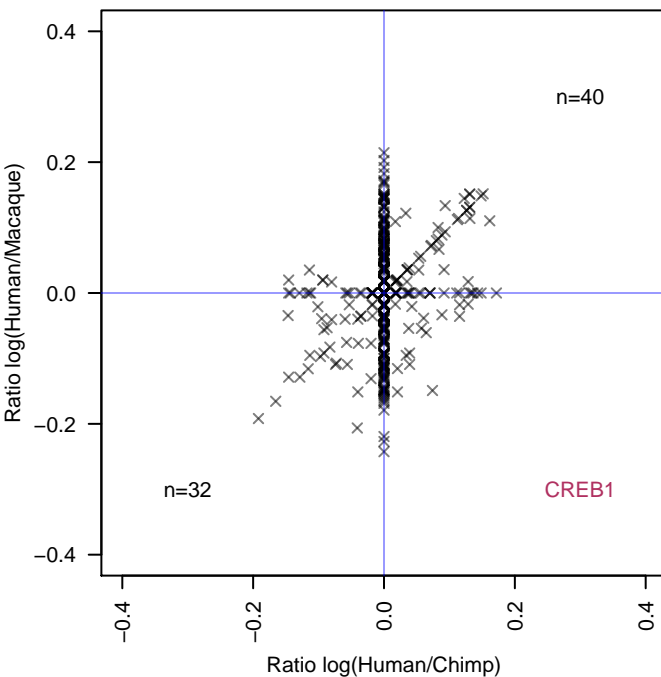

HumanDownFibroblast.final.bed

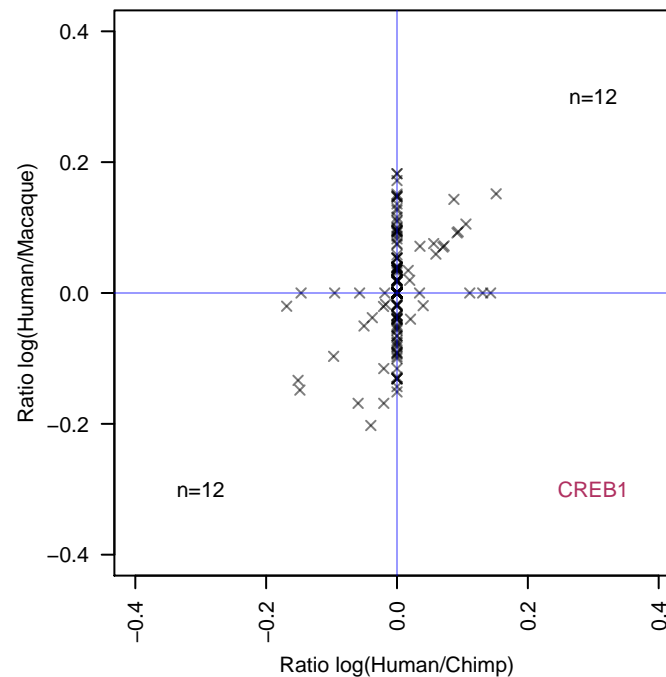

commonFibroblast.final.bed

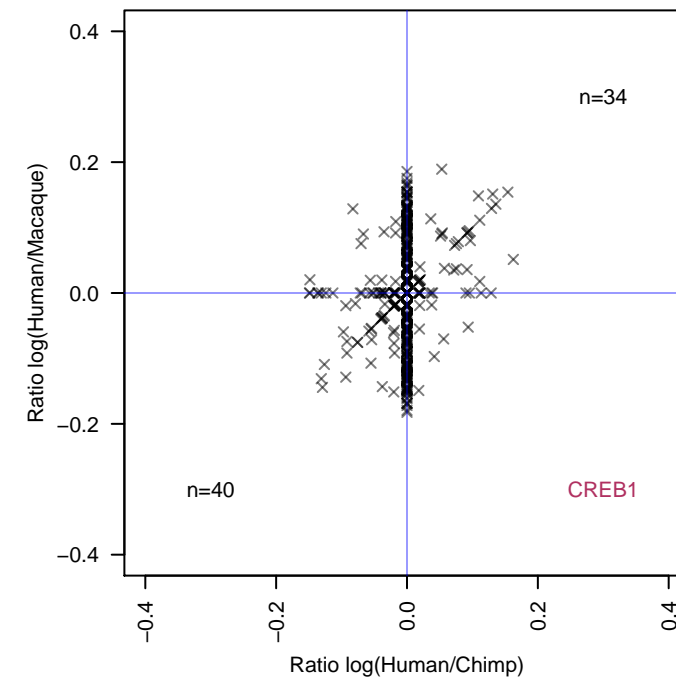

ChimpUpFibroblast.final.bed

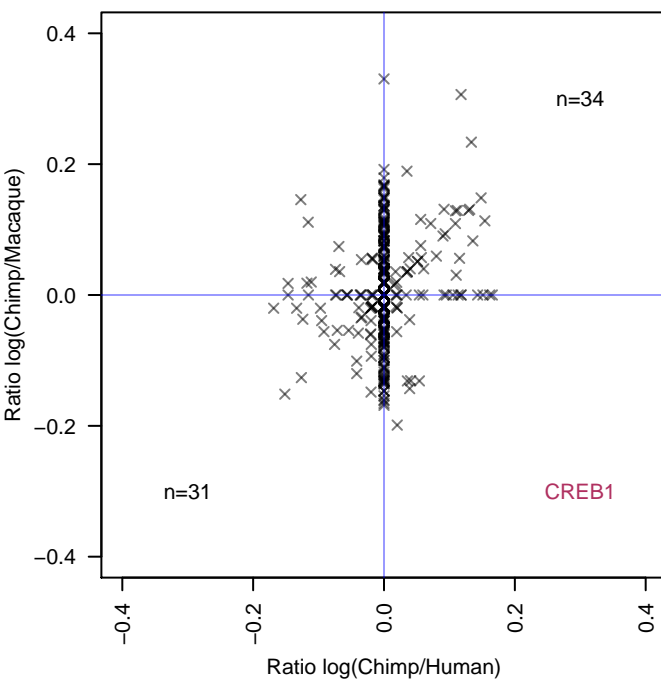

ChimpDownFibroblast.final.bed

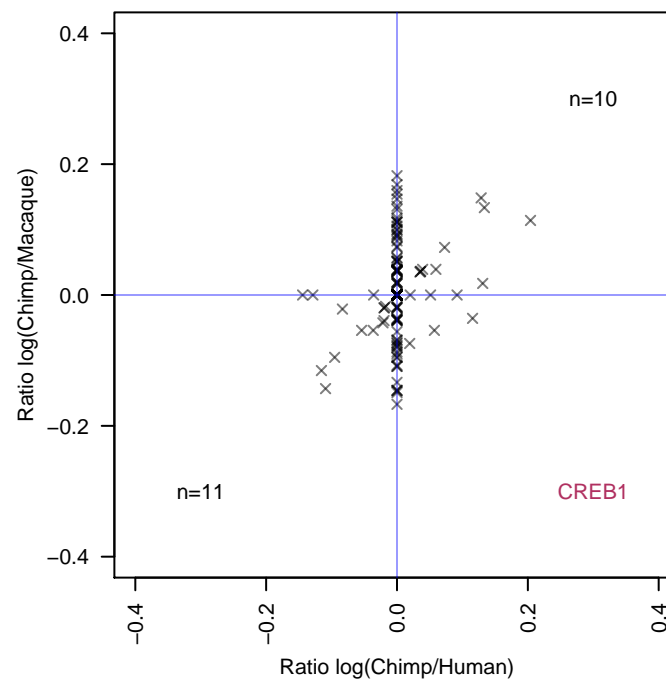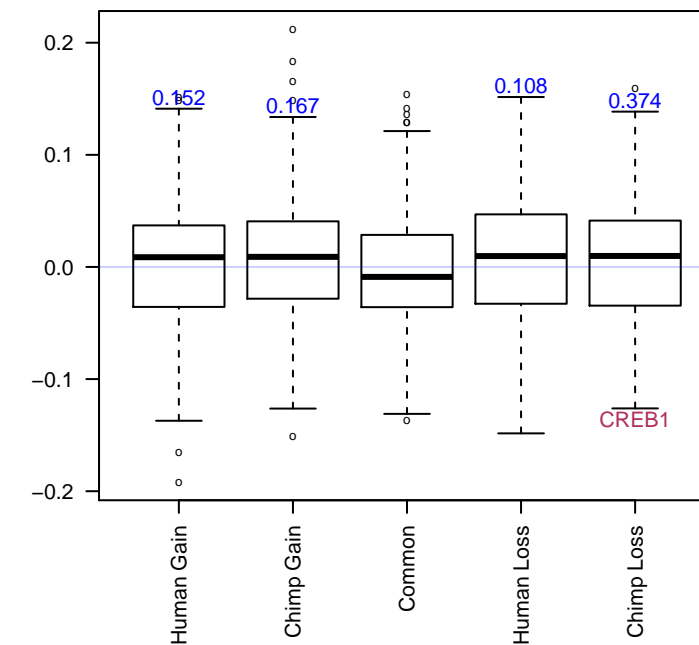

125 HumanUpFibroblast.final.bed

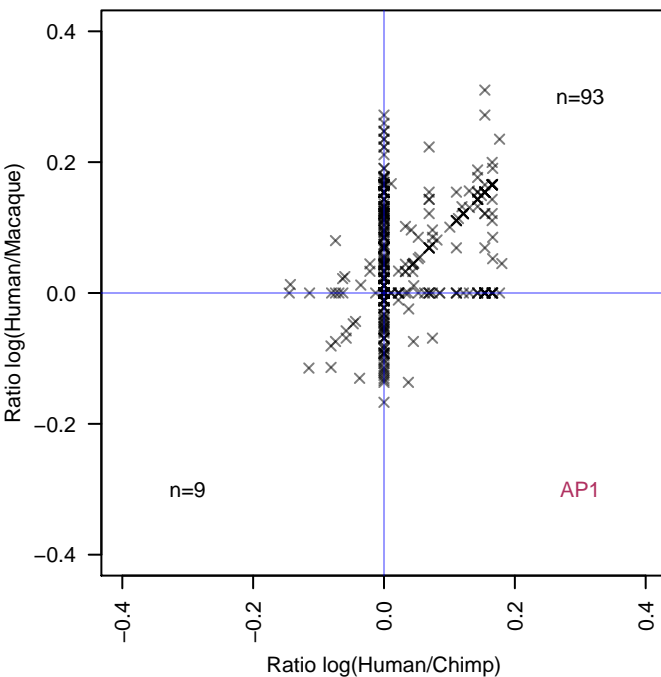

HumanDownFibroblast.final.bed

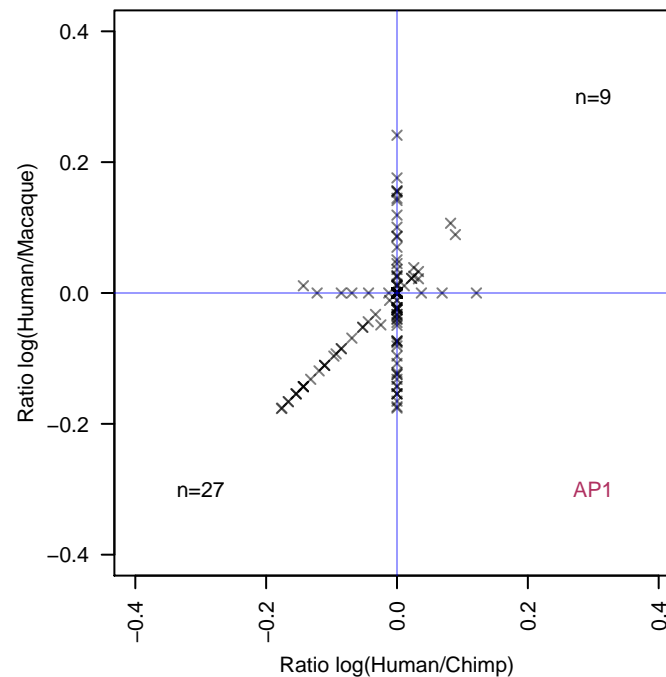

commonFibroblast.final.bed

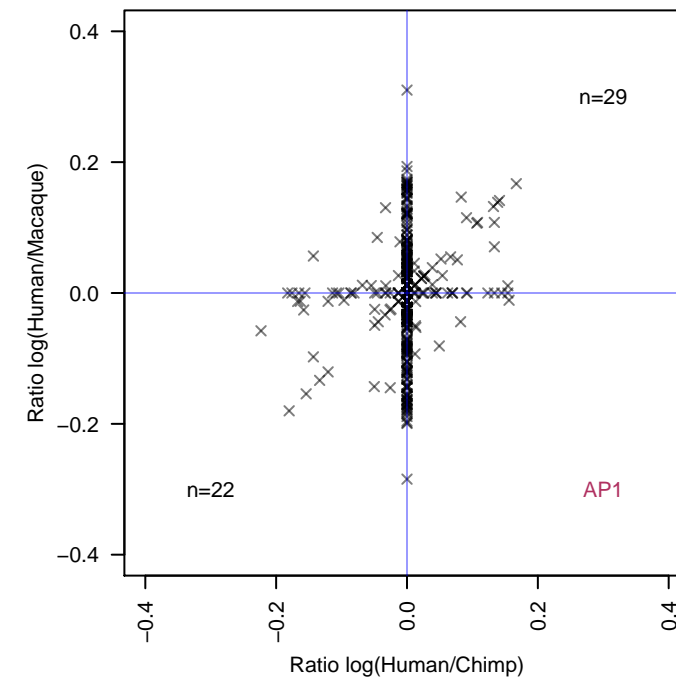

ChimpUpFibroblast.final.bed

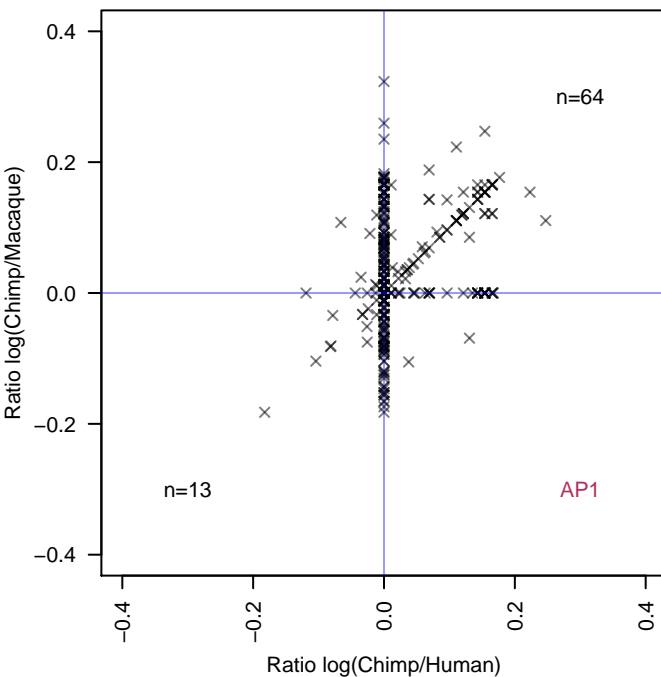

ChimpDownFibroblast.final.bed

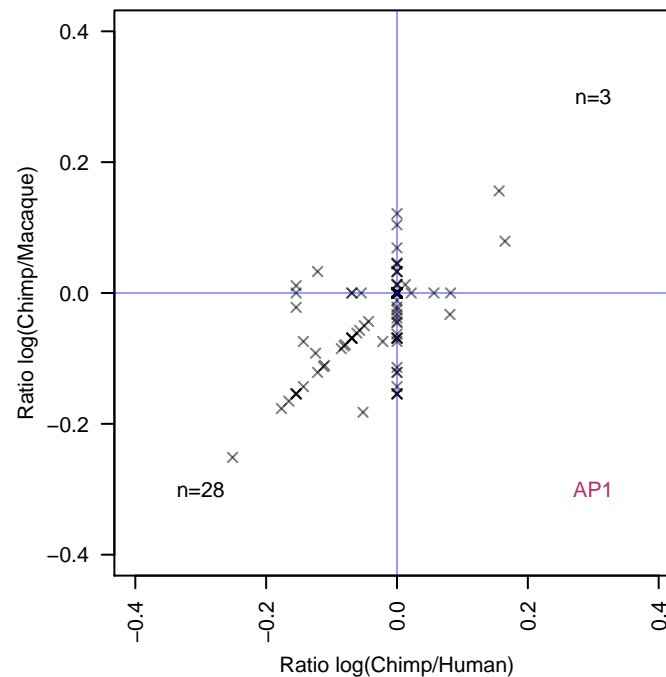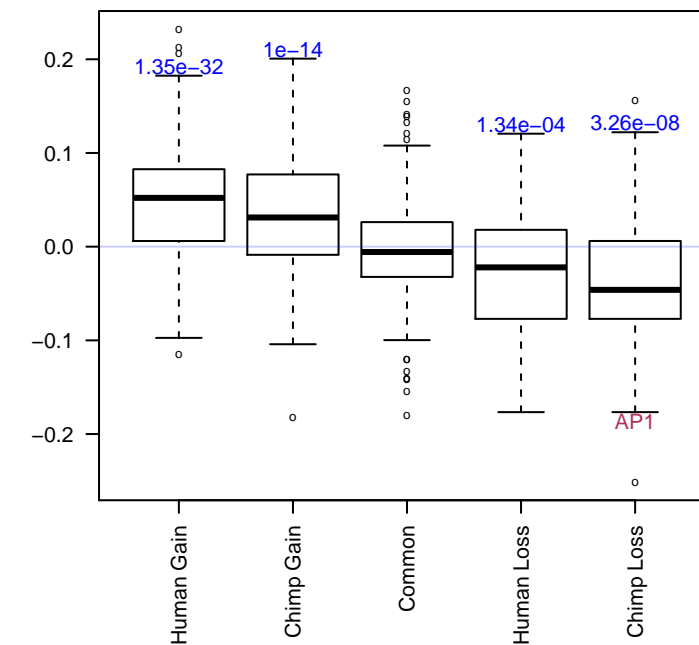

126 HumanUpFibroblast.final.bed

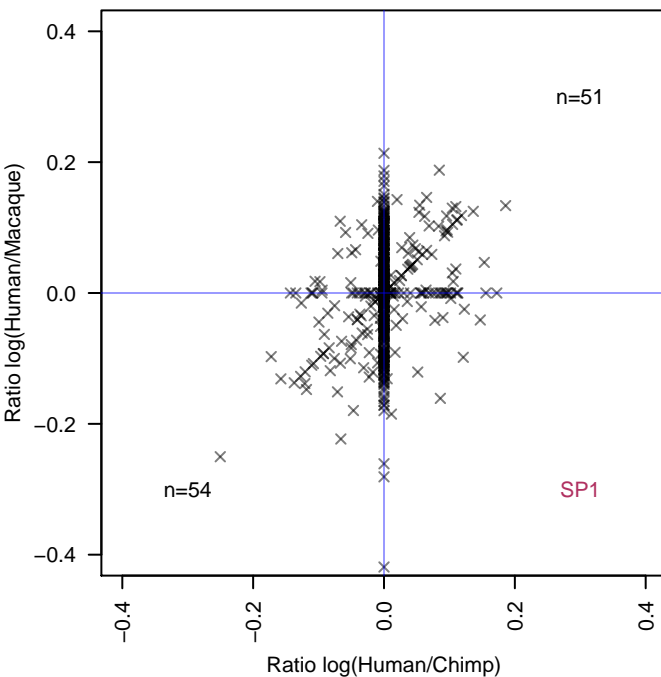

HumanDownFibroblast.final.bed

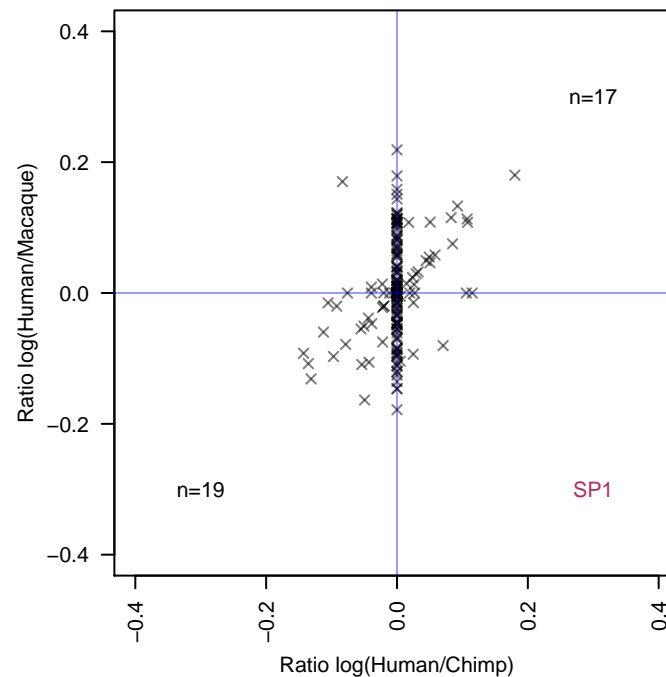

commonFibroblast.final.bed

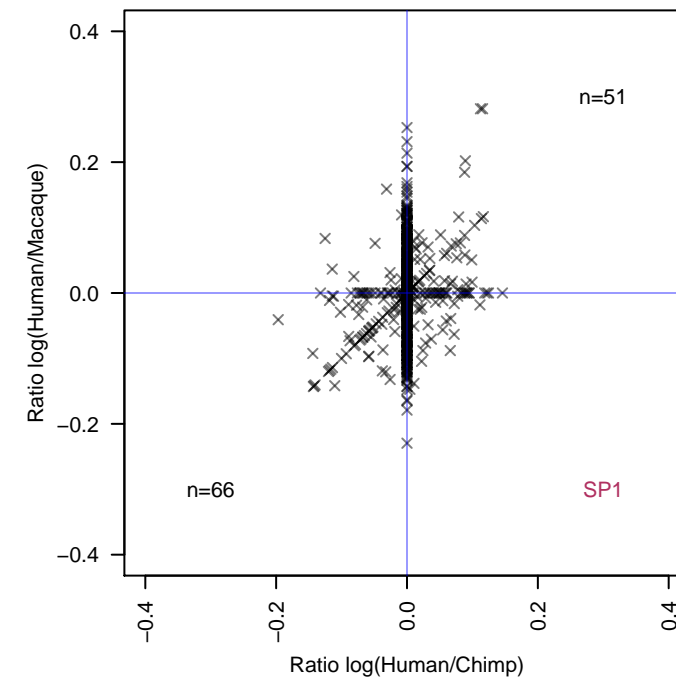

ChimpUpFibroblast.final.bed

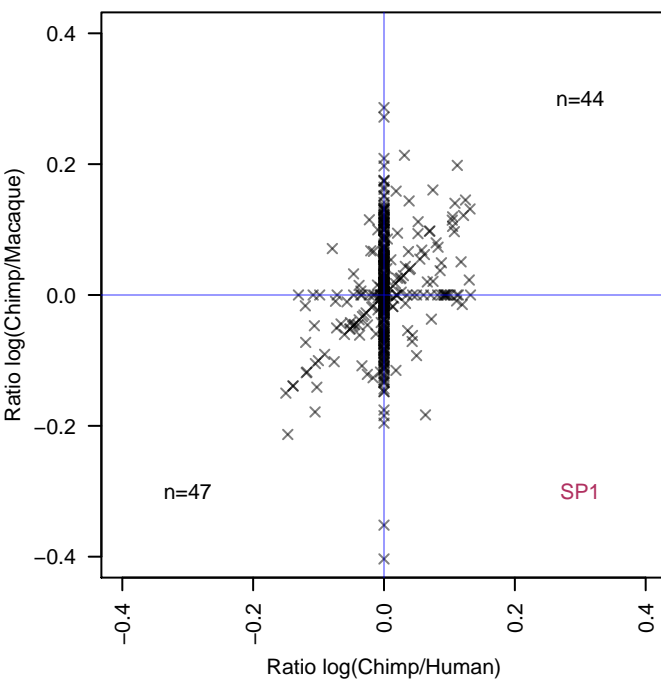

ChimpDownFibroblast.final.bed

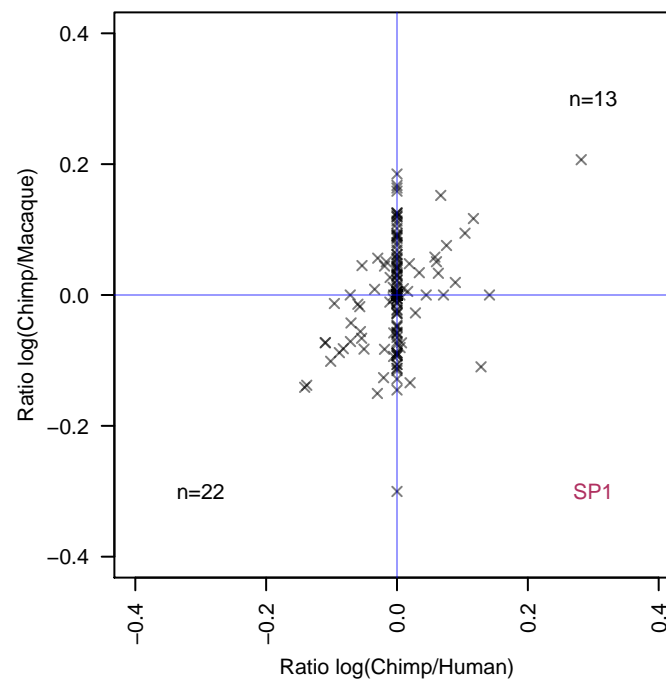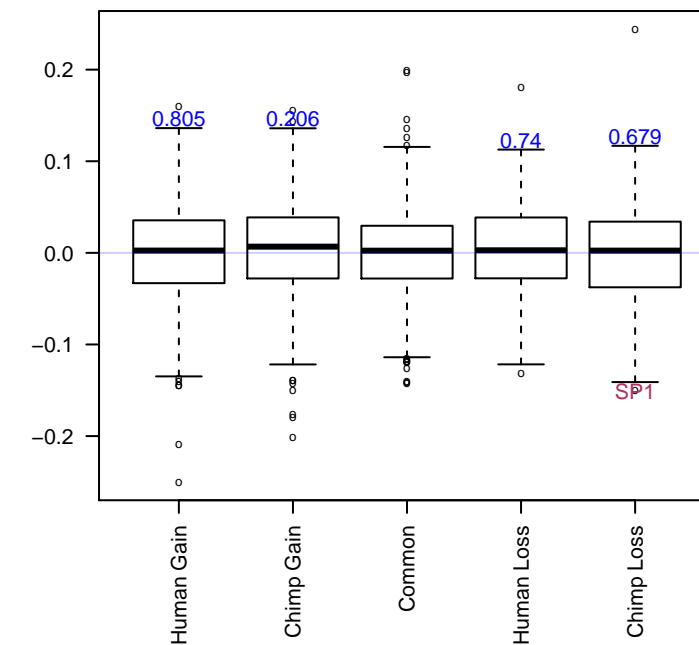

127 HumanUpFibroblast.final.bed

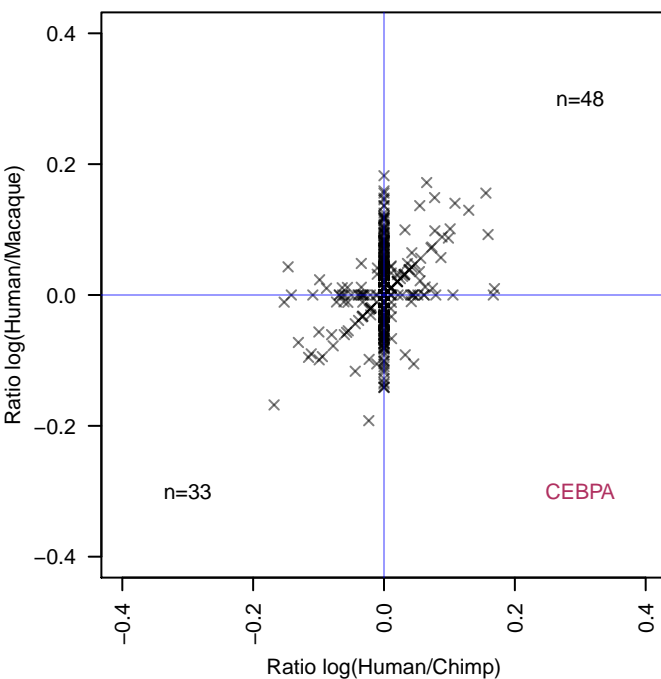

HumanDownFibroblast.final.bed

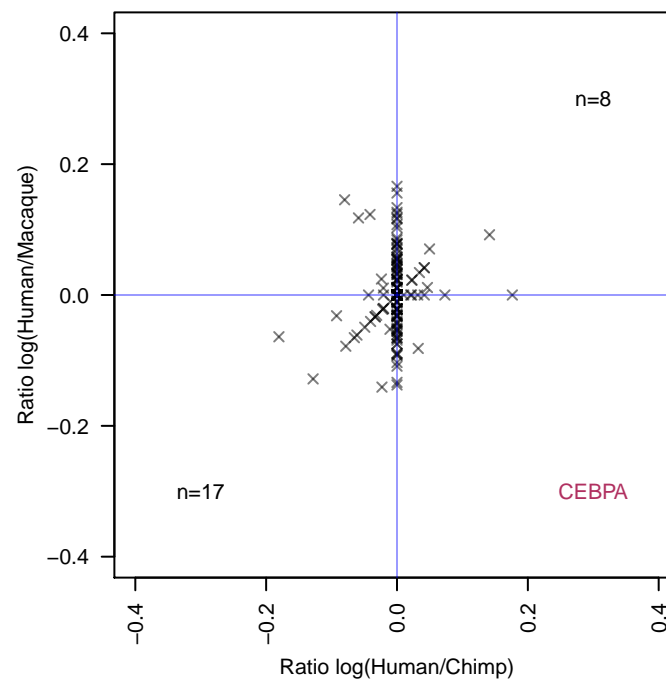

commonFibroblast.final.bed

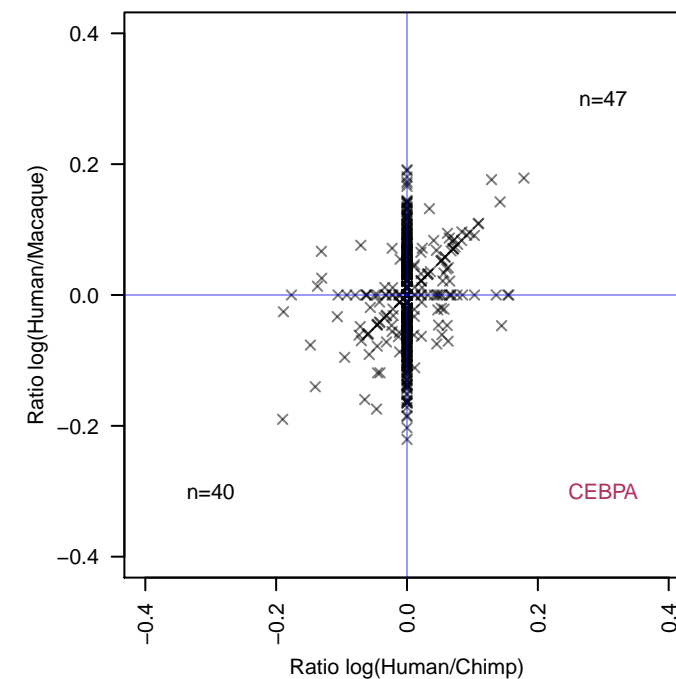

ChimpUpFibroblast.final.bed

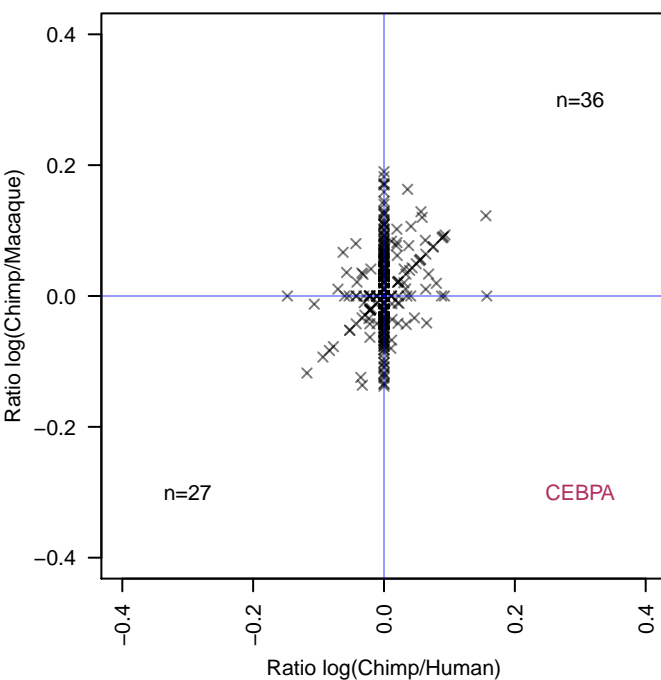

ChimpDownFibroblast.final.bed

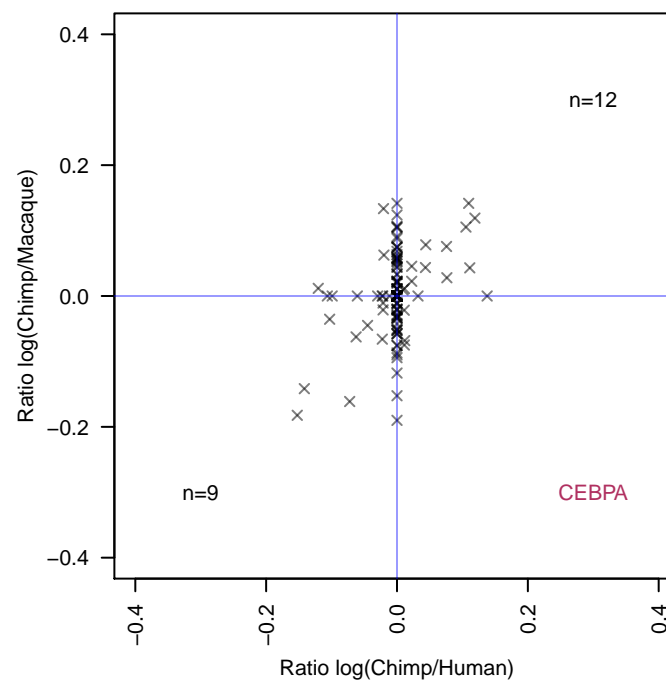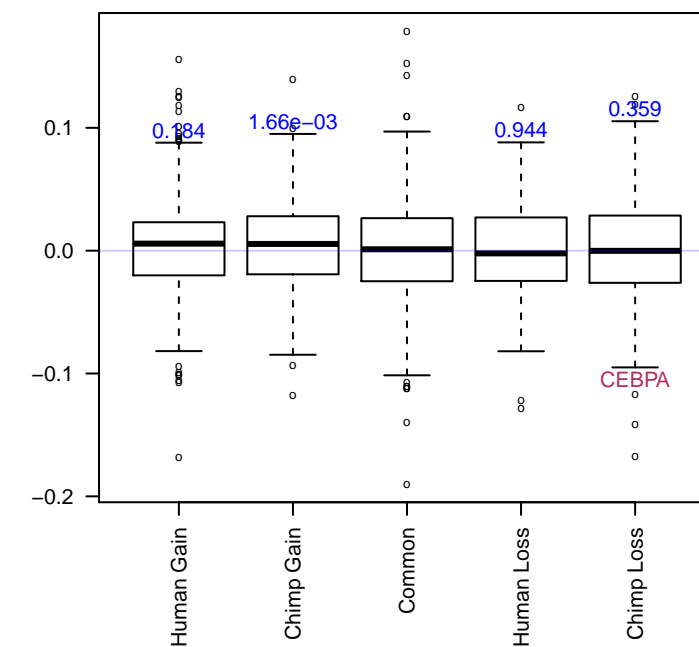

128 HumanUpFibroblast.final.bed

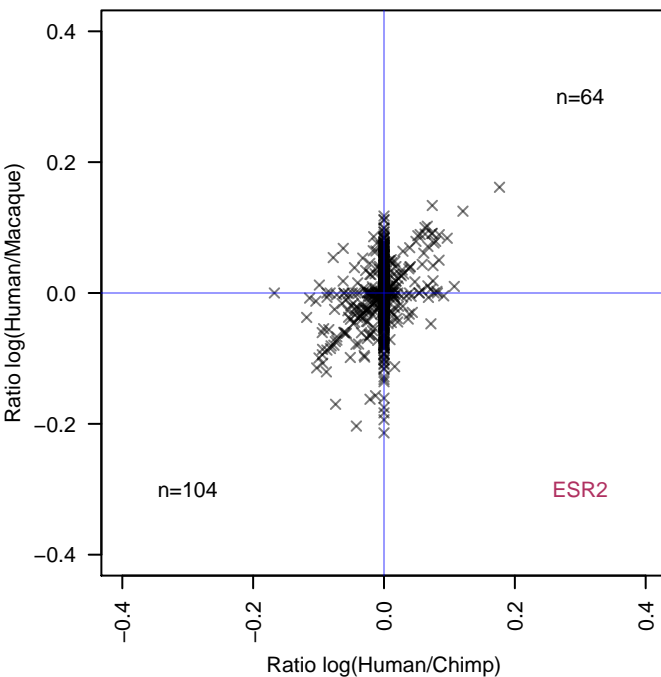

HumanDownFibroblast.final.bed

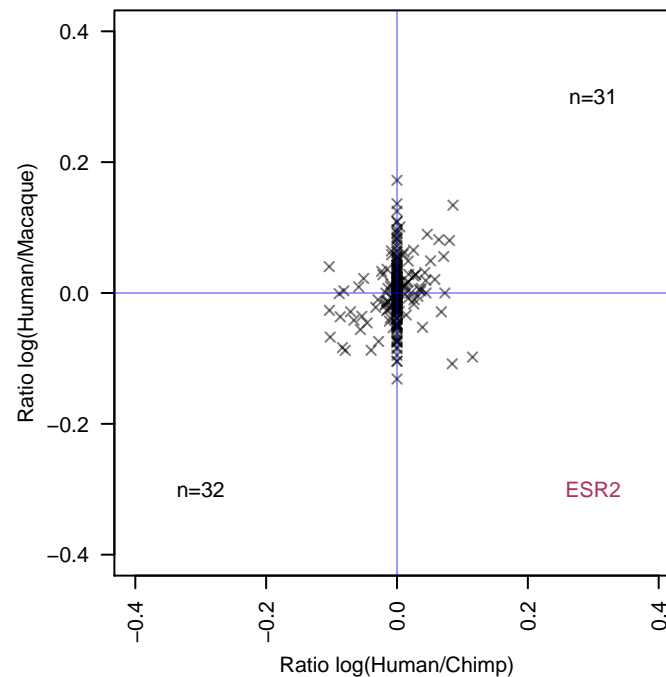

commonFibroblast.final.bed

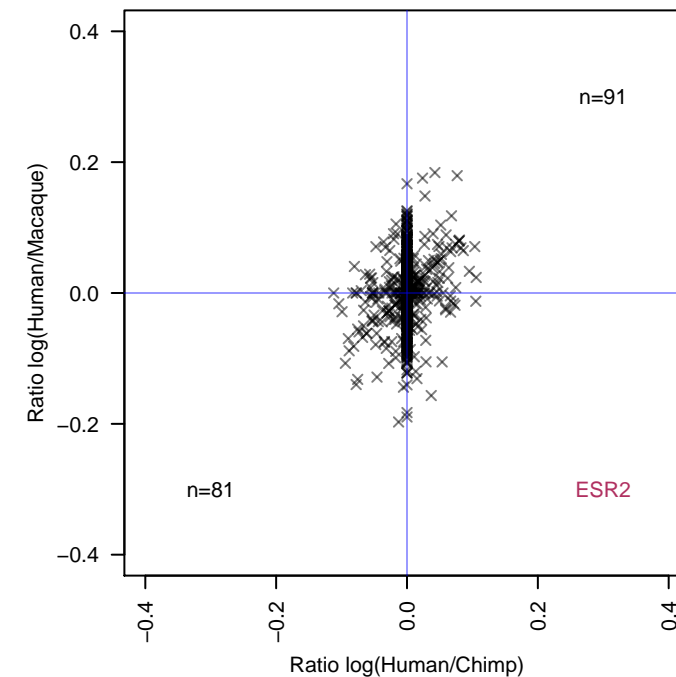

ChimpUpFibroblast.final.bed

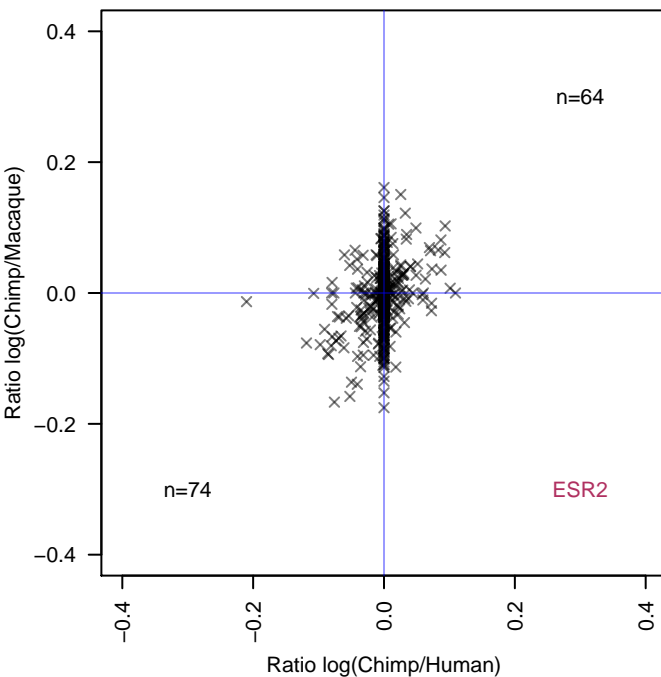

ChimpDownFibroblast.final.bed

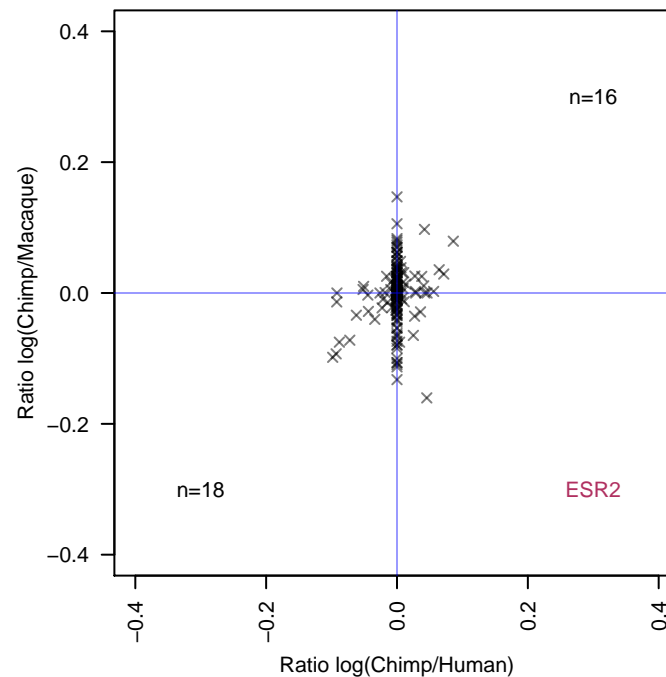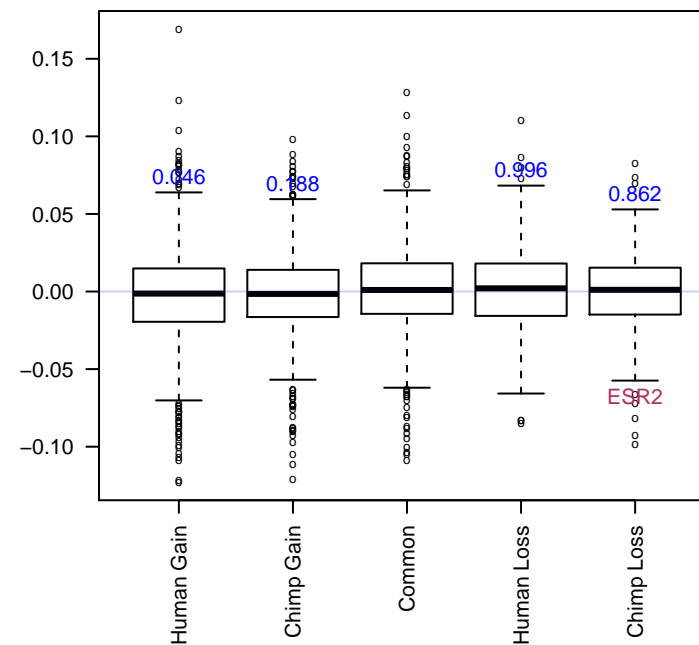

129 HumanUpFibroblast.final.bed

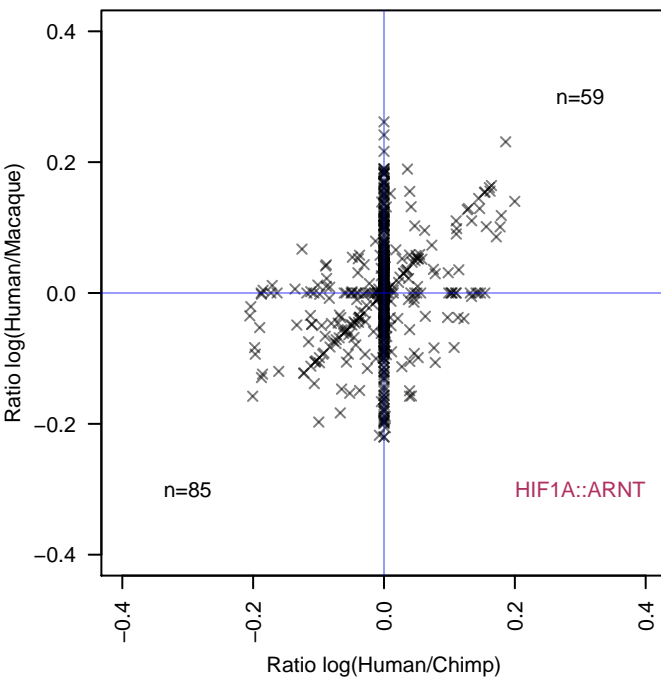

HumanDownFibroblast.final.bed

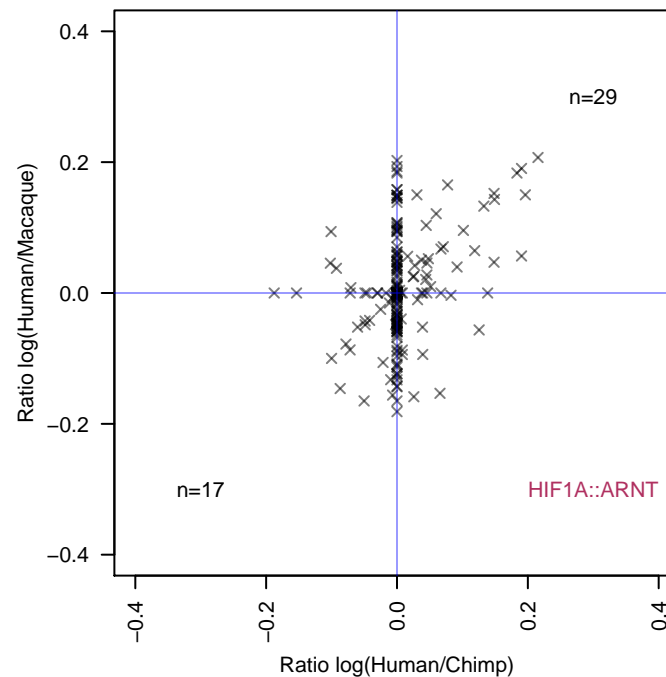

commonFibroblast.final.bed

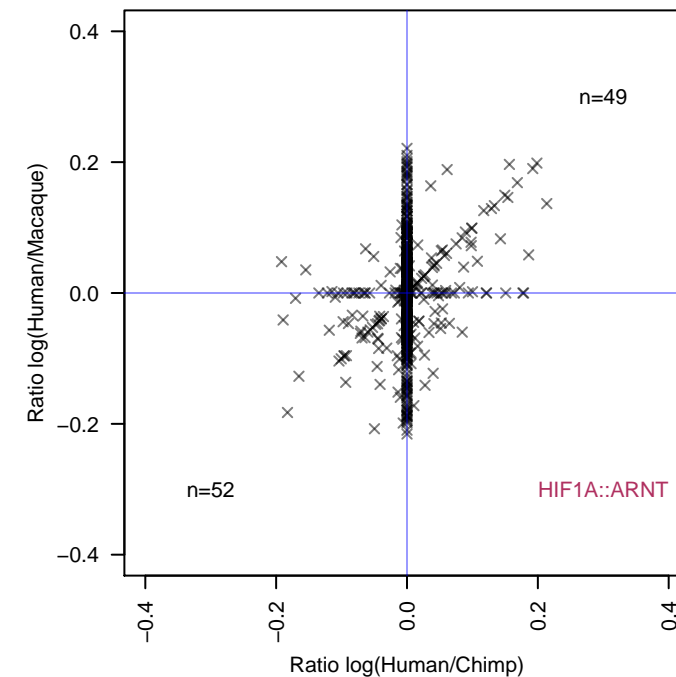

ChimpUpFibroblast.final.bed

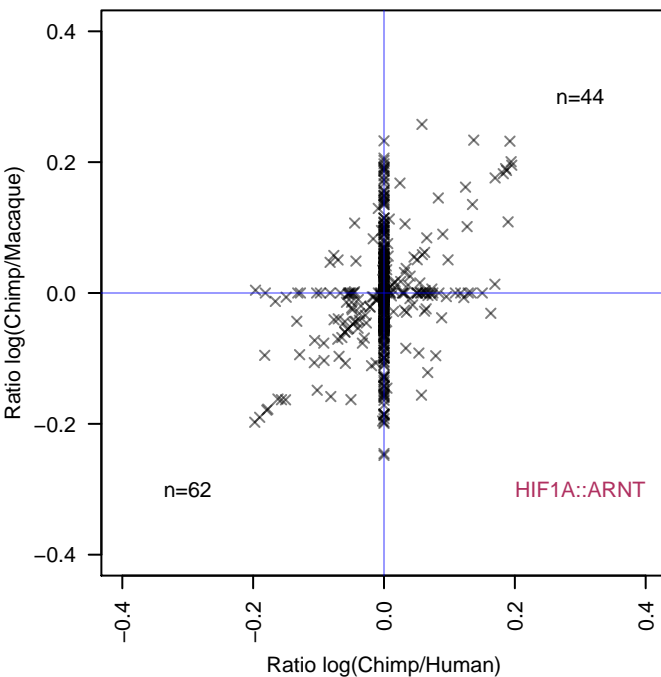

ChimpDownFibroblast.final.bed

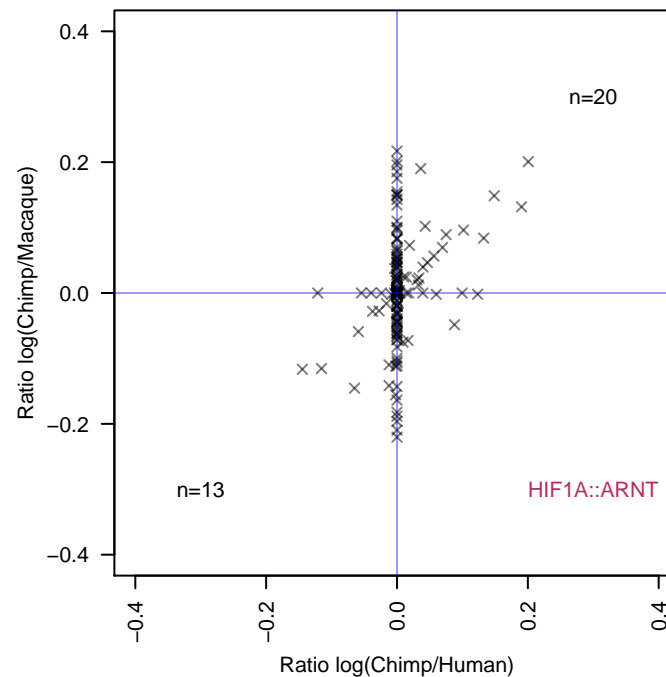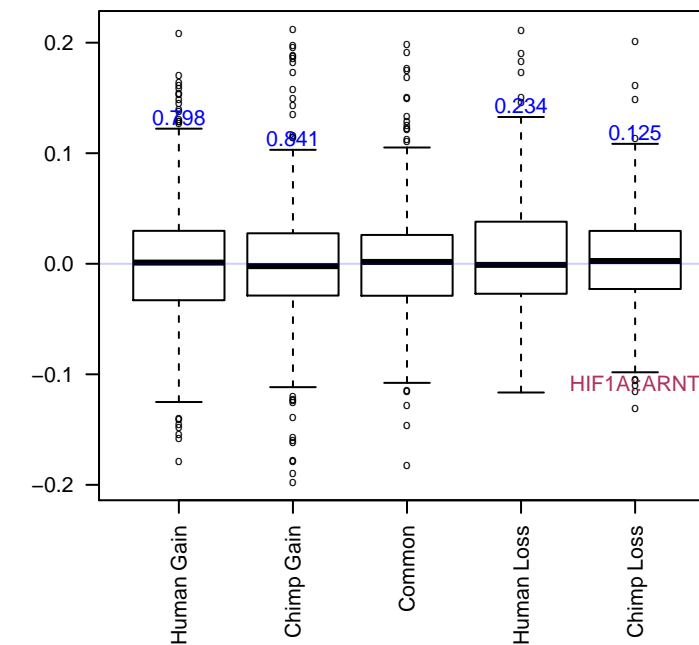

130 HumanUpFibroblast.final.bed

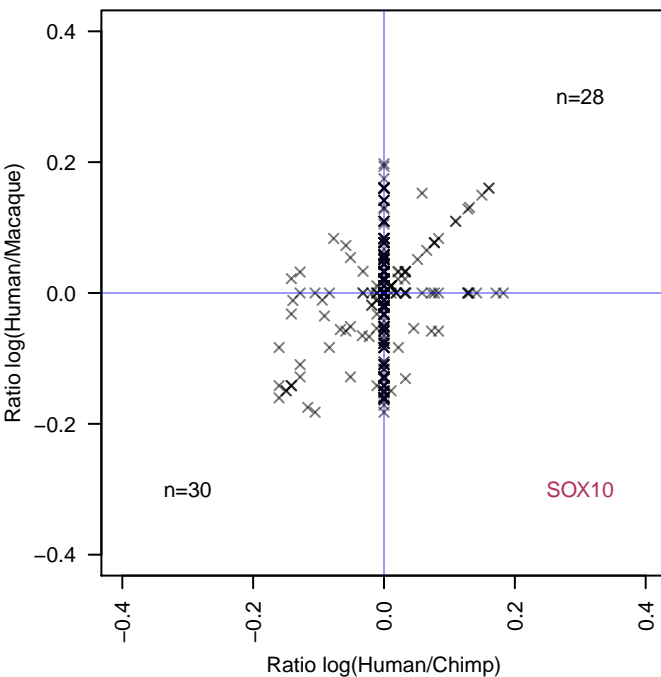

HumanDownFibroblast.final.bed

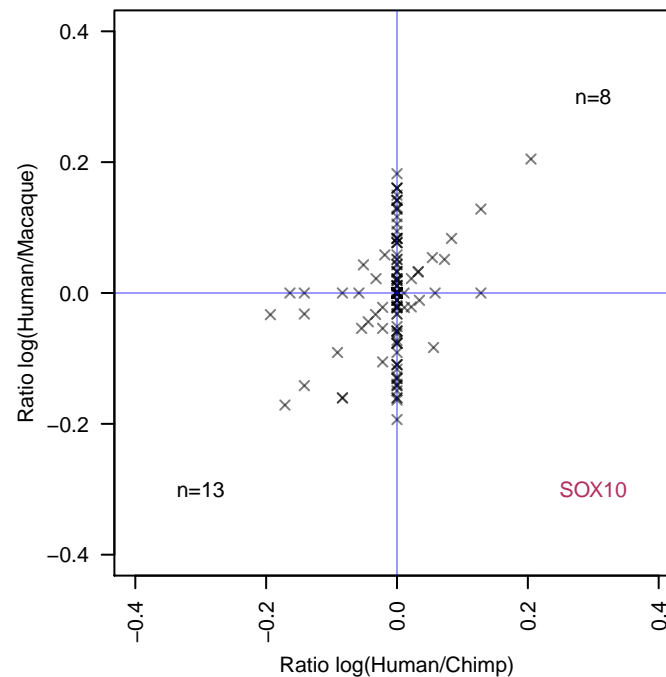

commonFibroblast.final.bed

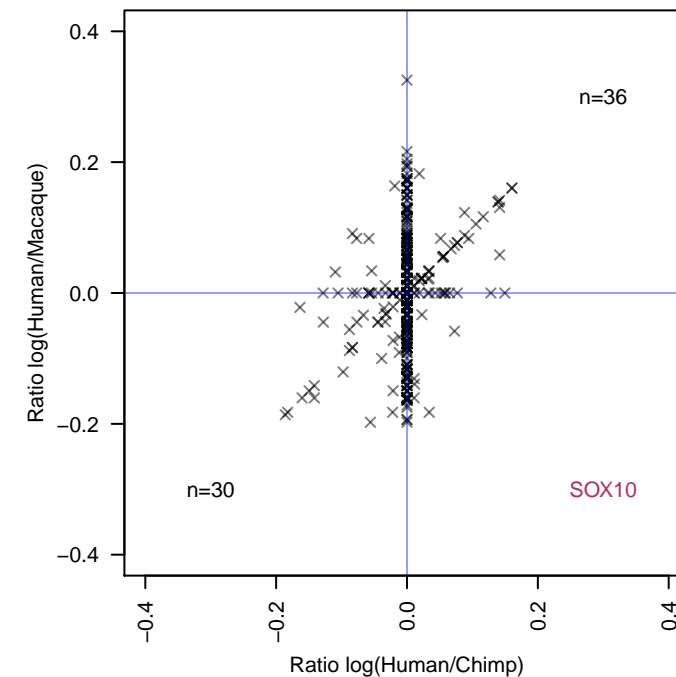

ChimpUpFibroblast.final.bed

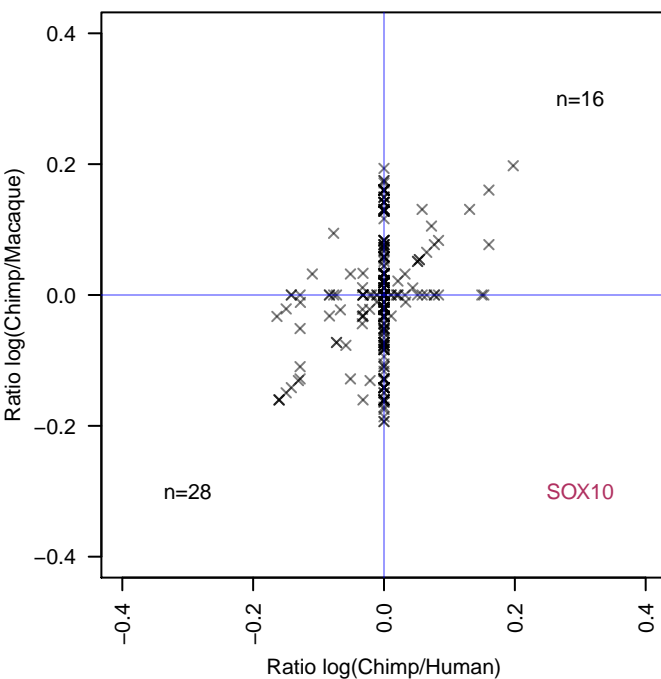

ChimpDownFibroblast.final.bed

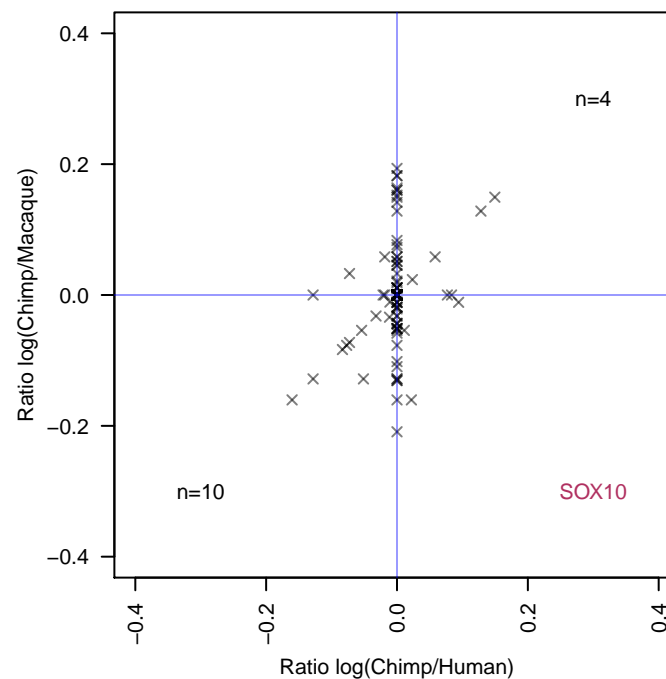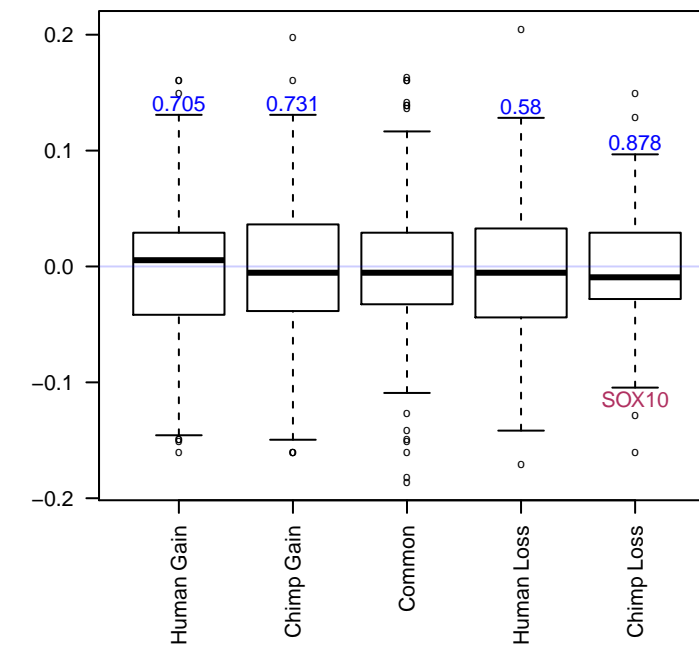

Supplement: S1 (10.1371/journal.pgen.1002789.s001) [file journal.pgen.1002789.s001]
