# Supplementary material for: Extensive Evolutionary Changes in Regulatory Element Activity during Human Origins Are Associated with Altered Gene Expression and Positive Selection
Source: PubMed Central journal article supplement (PMC3386175; doi:10.1371/journal.pgen.1002789), 2012-06-28

Number of cell types overlapping DHS sites

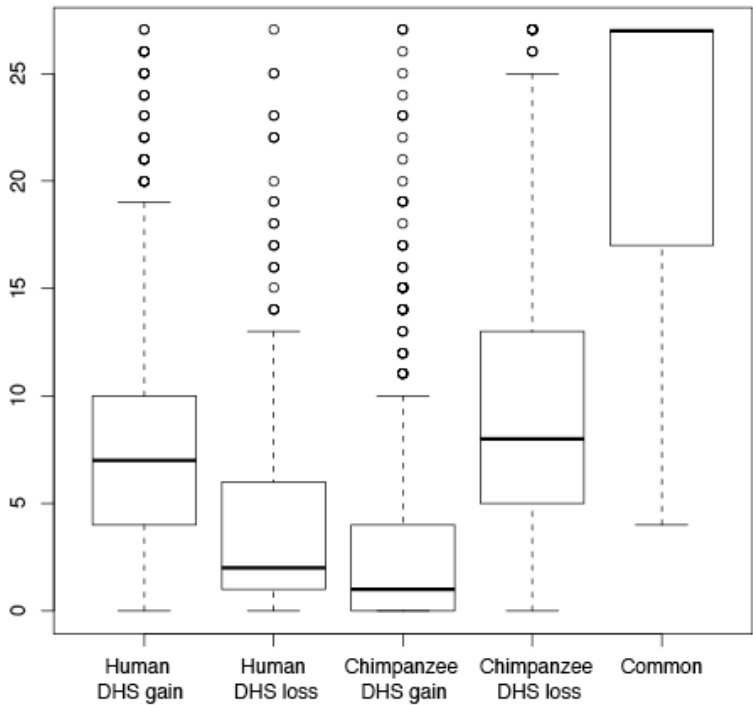

Supplement: pgen.1002789.s006.pdf [file pgen.1002789.s006.pdf]
