# Supplementary material for: Extensive Evolutionary Changes in Regulatory Element Activity during Human Origins Are Associated with Altered Gene Expression and Positive Selection
Source: PubMed Central journal article supplement (PMC3386175; doi:10.1371/journal.pgen.1002789), 2012-06-28
Supplement: pgen.1002789.s017.pdf [file pgen.1002789.s017.pdf]

| Sample ID | Species         | Age (yr) | Gender | Coriell Catalog No. | Cell Type                 | Site of biopsy         | DNase-seq, Total # of sequences (in hg19 space) | DNase-seq, % genome coverage of top100k peaks | DNase-seq, Median # of sequences per DHS site (top100k peaks) | DGE-seq, Total # of sequences |
|-----------|-----------------|----------|--------|---------------------|---------------------------|------------------------|-------------------------------------------------|-----------------------------------------------|---------------------------------------------------------------|-------------------------------|
| HF1       | Human           | 12       | M      | AG16408             | Lymphoblastoid            | blood, peripheral vein | 29,332,310                                      | 1.89%                                         | 51                                                            | 10,950,474                    |
| HL1       |                 |          |        | AG16409             | Primary Dermal Fibroblast | skin, unspecified      | 37,624,821                                      | 2.13%                                         | 26                                                            | 8,876,138                     |
| HF2       | Human           | 36       | M      | GM02184             | Lymphoblastoid            | blood, peripheral vein | 30,272,133                                      | 2.2%                                          | 29                                                            | 5,701,620                     |
| HL2       |                 |          |        | GM02185             | Primary Dermal Fibroblast | skin, unspecified      | 25,253,295                                      | 1.77%                                         | 31                                                            | 9,960,440                     |
| HF3       | Human           | 48       | F      | GM05920             | Lymphoblastoid            | blood, peripheral vein | 28,414,314                                      | 2.73%                                         | 25                                                            | 6,729,690                     |
| HL3       |                 |          |        | GM05879             | Primary Dermal Fibroblast | skin, upper arm        | 17,998,960                                      | 1.82%                                         | 40                                                            | 8,470,902                     |
| CF1       | Pan troglodytes | 9        | M      | S003648             | Lymphoblastoid            | blood, peripheral vein | 29,343,610                                      | 3.02%                                         | 55                                                            | 4,223,955                     |
| CL1       |                 |          |        | S003649             | Primary Dermal Fibroblast | skin, unspecified*     | 34,974,357                                      | 2.4%                                          | 50                                                            | 9,711,114                     |
| CF2       | Pan troglodytes | 14       | M      | S003623             | Lymphoblastoid            | blood, peripheral vein | 41,226,270                                      | 1.9%                                          | 94                                                            | 5,788,846                     |
| CL2       |                 |          |        | S003624             | Primary Dermal Fibroblast | skin, unspecified*     | 59,866,736                                      | 3.07%                                         | 33                                                            | 10,349,784                    |
| CF3       | Pan troglodytes | 16       | M      | S007602             | Lymphoblastoid            | blood, peripheral vein | 20,329,252                                      | 1.64%                                         | 33                                                            | 4,721,760                     |
| CL3       |                 |          |        | S007603             | Primary Dermal Fibroblast | skin, unspecified*     | 24,840,265                                      | 2.03%                                         | 17                                                            | 7,420,880                     |
| MF1       | Macaca mulatta  | 5        | F      | AG06252             | Primary Dermal Fibroblast | skin, upper arm        | 29,330,217                                      | 2.04%                                         | 36                                                            | 3,626,144                     |
| MF2       | Macaca mulatta  | 1        | M      | AG08305             | Primary Dermal Fibroblast | skin, upper arm        | 31,937,760                                      | 2.49%                                         | 50                                                            | 5,142,449                     |
| MF3       | Macaca mulatta  | 1        | M      | AG08308             | Primary Dermal Fibroblast | skin, upper arm        | 20,324,578                                      | 1.99%                                         | 29                                                            | 7,004,730                     |

\* Standard location of skin punch biopsy for chimpanzees at Yerkes Regional Primate Research Center is the ear pinna.
