# Supplementary material for: Extensive Evolutionary Changes in Regulatory Element Activity during Human Origins Are Associated with Altered Gene Expression and Positive Selection
Source: PubMed Central journal article supplement (PMC3386175; doi:10.1371/journal.pgen.1002789), 2012-06-28
Supplement: pgen.1002789.s022.pdf [file pgen.1002789.s022.pdf]

|               | <b>Human DHS gain vs loss</b> | <b>Human DHS gain vs common</b> | <b>Human DHS loss vs common</b> |
|---------------|-------------------------------|---------------------------------|---------------------------------|
| <b>K4me1</b>  | <2.2e-16                      | <2.2e-16                        | 0.02426                         |
| <b>K4me2</b>  | 1.529e-15                     | 0.2836                          | <2.2e-16                        |
| <b>K4me3</b>  | 3.459e-12                     | 0.5739                          | <2.2e-16                        |
| <b>K9me3</b>  | 0.0005996                     | 0.04043                         | 0.008462                        |
| <b>K27me3</b> | 0.03788                       | 0.6775                          | 0.0001605                       |
| <b>K27ac</b>  | 3.728e-12                     | 0.3278                          | <2.2e-16                        |
| <b>CTCF</b>   | 4.34e-07                      | 0.00914                         | <2.2e-16                        |
