# Supplementary material for: Extensive Evolutionary Changes in Regulatory Element Activity during Human Origins Are Associated with Altered Gene Expression and Positive Selection
Source: PLOS journal article supplement (doi:10.1371/journal.pgen.1002789), 2012-06-28

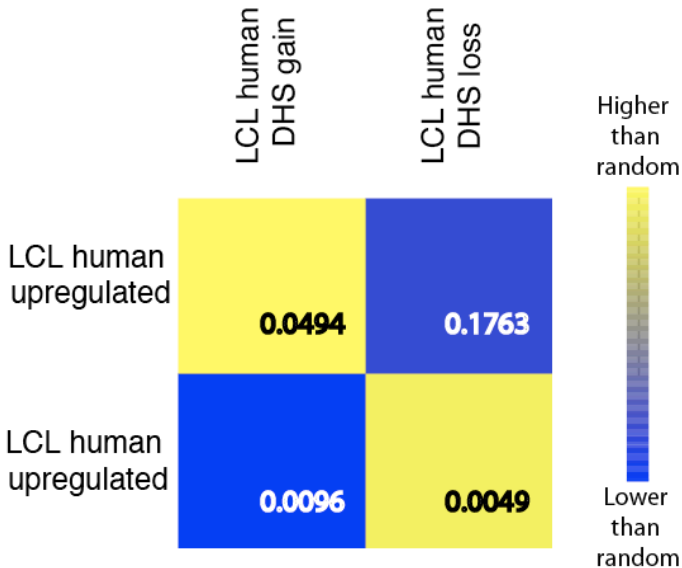

Supplement: S9 (10.1371/journal.pgen.1002789.s009) [file journal.pgen.1002789.s009]
