# Supplementary material for: Extensive Evolutionary Changes in Regulatory Element Activity during Human Origins Are Associated with Altered Gene Expression and Positive Selection
Source: PLOS journal article supplement (doi:10.1371/journal.pgen.1002789), 2012-06-28
Supplement: S21 (10.1371/journal.pgen.1002789.s021) [file journal.pgen.1002789.s021]

|                   | human DHS gains (%) | human DHS losses (%) | common DHS (%) |
|-------------------|---------------------|----------------------|----------------|
| GM12878           | 96.12%              | 16.02%               | 99.94%         |
| GM19239           | 96.12%              | 14.92%               | 99.87%         |
| GM19240           | 93.20%              | 14.36%               | 99.87%         |
| GM18507           | 92.23%              | 12.15%               | 99.43%         |
| GM19238           | 92.23%              | 19.34%               | 99.87%         |
| GM12891           | 85.44%              | 20.99%               | 99.43%         |
| GM12892           | 85.44%              | 21.55%               | 97.79%         |
| Myotube           | 37.86%              | 20.99%               | 77.95%         |
| Chorion           | 36.89%              | 23.76%               | 65.70%         |
| HelaS3            | 35.92%              | 21.55%               | 77.38%         |
| HelaS3_IFNA       | 35.92%              | 17.68%               | 77.20%         |
| Myometrial        | 35.92%              | 18.23%               | 76.25%         |
| MCF7              | 33.98%              | 13.81%               | 74.48%         |
| Fibroblasts_park  | 33.01%              | 16.57%               | 80.48%         |
| HUVEC             | 33.01%              | 21.55%               | 79.91%         |
| Myoblast          | 33.01%              | 23.20%               | 78.33%         |
| Pancreatic_islets | 33.01%              | 20.44%               | 78.02%         |
| FB0167P           | 32.04%              | 16.57%               | 77.57%         |
| H1_ES             | 32.04%              | 24.86%               | 72.46%         |
| NHEK              | 32.04%              | 15.47%               | 77.26%         |
| H9_ES             | 31.07%              | 17.68%               | 74.48%         |
| D721              | 30.10%              | 12.71%               | 69.36%         |
| K562              | 29.13%              | 19.89%               | 78.27%         |
| Melanocyte        | 29.13%              | 12.15%               | 77.83%         |
| HepG2             | 28.16%              | 18.23%               | 75.99%         |
| FB8470            | 27.18%              | 10.50%               | 72.52%         |
| SM_SFM            | 23.30%              | 11.60%               | 75.05%         |
