# Supplementary material for: Extensive Evolutionary Changes in Regulatory Element Activity during Human Origins Are Associated with Altered Gene Expression and Positive Selection
Source: PLOS journal article supplement (doi:10.1371/journal.pgen.1002789), 2012-06-28
Supplement: S23 (10.1371/journal.pgen.1002789.s023) [file journal.pgen.1002789.s023]

| <b>a</b> <b>Number of overlap between species-specific DNaseHS and Expression</b> |                       |                       |                            |                            |
|-----------------------------------------------------------------------------------|-----------------------|-----------------------|----------------------------|----------------------------|
|                                                                                   | <u>Human DHS gain</u> | <u>Human DHS loss</u> | <u>Chimpanzee DHS gain</u> | <u>Chimpanzee DHS loss</u> |
| <u>Human upregulated</u>                                                          | 58                    | 5                     | 23                         | 14                         |
| <u>Human downregulated</u>                                                        | 17                    | 28                    | 43                         | 10                         |
| <u>Chimpanzee upregulated</u>                                                     | 16                    | 16                    | 37                         | 3                          |
| <u>Chimpanzee downregulated</u>                                                   | 42                    | 3                     | 13                         | 12                         |
|                                                                                   |                       |                       |                            |                            |
|                                                                                   |                       |                       |                            |                            |
|                                                                                   |                       |                       |                            |                            |

| <b>b</b> <b>Likelihood of finding LESS matches by random chance (permuted 100,000x)</b> |                       |                       |                            |                            |
|-----------------------------------------------------------------------------------------|-----------------------|-----------------------|----------------------------|----------------------------|
|                                                                                         | <u>Human DHS gain</u> | <u>Human DHS loss</u> | <u>Chimpanzee DHS gain</u> | <u>Chimpanzee DHS loss</u> |
| <u>Human upregulated</u>                                                                | >0.999                | 0.002                 | 0.093                      | 0.769                      |
| <u>Human downregulated</u>                                                              | 0.008                 | >0.999                | >0.999                     | 0.472                      |
| <u>Chimpanzee upregulated</u>                                                           | 0.018                 | 0.95                  | 0.999                      | 0.009                      |
| <u>Chimpanzee downregulated</u>                                                         | 0.999                 | 0.002                 | 0.013                      | 0.861                      |
|                                                                                         |                       |                       |                            |                            |
|                                                                                         |                       |                       |                            |                            |
|                                                                                         |                       |                       |                            |                            |

| <b>c</b> <b>Likelihood of finding MORE matches by random chance (permuted 100,000x)</b> |                       |                       |                            |                            |
|-----------------------------------------------------------------------------------------|-----------------------|-----------------------|----------------------------|----------------------------|
|                                                                                         | <u>Human DHS gain</u> | <u>Human DHS loss</u> | <u>Chimpanzee DHS gain</u> | <u>Chimpanzee DHS loss</u> |
| <u>Human upregulated</u>                                                                | <0.001                | 0.998                 | 0.907                      | 0.231                      |
| <u>Human downregulated</u>                                                              | 0.992                 | <0.001                | <0.001                     | 0.528                      |
| <u>Chimpanzee upregulated</u>                                                           | 0.982                 | 0.05                  | 0.001                      | 0.991                      |
| <u>Chimpanzee downregulated</u>                                                         | 0.001                 | 0.998                 | 0.987                      | 0.139                      |
